# Supplementary material for: Electrophilic trifluoromethylthiolation of thiols with trifluoromethanesulfenamide
Source: Royal Society of Chemistry journal article supplement (doi:10.1039/c5ra07316b), 2015-01-01
Supplement: c5ra07316b1.pdf [file c5ra07316b1.pdf]

Supporting Information

**Electrophilic Trifluoromethylthiolation of Thiols with  
Trifluoromethanesulfenamide**

**Marjan Jereb\* and Darko Dolenc**

*Department of Organic Chemistry, Faculty of Chemistry and Chemical Technology, Večna pot 113,  
1001 Ljubljana, Slovenia*

(marjan.jereb@fkkt.uni-lj.si)

**Computational details**

Final optimized geometries and energies of species, appearing in Scheme

Geometries optimized at MPW1K/6-311\*\*+ level of theory in dichloromethane, using Poisson-Boltzmann model.

Enthalpies are calculated from solution optimized geometries and energies, corrected by vibrational contribution computed in vacuum:  $H(\text{sol}) = E_{\text{tot}}(\text{sol}) - E_{\text{tot}}(\text{vac}) + H(\text{vac})$

### PhNH<sub>2</sub>

final geometry:

|      | angstroms     |               |               |
|------|---------------|---------------|---------------|
| atom | x             | y             | z             |
| C1   | -1.4197109564 | -0.7636274957 | -1.8836995515 |
| C2   | -1.0204717347 | -1.9595860016 | -1.2860717972 |
| C3   | -1.8044062715 | -2.5569581249 | -0.3140725627 |
| C4   | -3.0023301175 | -1.9839136112 | 0.0843447465  |
| C5   | -3.4075858294 | -0.8008207393 | -0.5146399158 |
| C6   | -2.6318875689 | -0.1962192916 | -1.4883508559 |
| H7   | -0.0888200416 | -2.4206662491 | -1.5854491752 |
| H8   | -1.4706951350 | -3.4797701360 | 0.1393659765  |
| H9   | -3.6078792080 | -2.4495853448 | 0.8473417081  |
| H10  | -4.3395879429 | -0.3389155421 | -0.2203263814 |
| H11  | -2.9650720406 | 0.7244191340  | -1.9481647937 |
| N17  | -0.6580782571 | -0.1817661996 | -2.8911103472 |
| H18  | -0.7747774658 | 0.8142302554  | -2.9862042610 |
| H19  | 0.3193719674  | -0.4247417208 | -2.8738590247 |

$E_{\text{tot}}(\text{vac})$  -287.59610888789 hartrees  
Total enthalpy,  $H_{\text{tot}}(U_{\text{tot}} + pV)$ : -287.469312 hartrees  
 $E_{\text{tot}}(\text{sol})$  -287.60846329315 hartrees

### MeSO<sub>3</sub>H

final geometry:

|      | angstroms     |               |               |
|------|---------------|---------------|---------------|
| atom | x             | y             | z             |
| S1   | -0.7906516857 | 0.3480676509  | -0.0859850385 |
| O2   | -2.1801786363 | -0.1145666175 | -0.2428671330 |
| O5   | -0.6965316685 | 1.5941206758  | 0.6936674236  |
| C5   | 0.0416600009  | -0.8959381679 | 0.8639148957  |
| H6   | 1.0741135717  | -0.5906145023 | 1.0032822582  |
| H7   | -0.4586361587 | -0.9890363337 | 1.8229764349  |
| H8   | -0.0059163723 | -1.8338650887 | 0.3193018737  |
| O8   | -0.0782866507 | 0.4324231797  | -1.3724023970 |

$E_{\text{tot}}(\text{vac})$  -663.80175100915 hartrees  
Total enthalpy,  $H_{\text{tot}}(U_{\text{tot}} + pV)$ : -663.744055 hartrees  
 $E_{\text{tot}}(\text{sol})$  -663.90882875403 hartrees

### PhNH<sub>3</sub><sup>+</sup>MeSO<sub>3</sub><sup>-</sup>-Ion Pair

final geometry:

|      | angstroms     |               |               |  |
|------|---------------|---------------|---------------|--|
| atom | x             | y             | z             |  |
| C1   | -1.4393358364 | -0.7755623178 | -1.8529372708 |  |
| C2   | -1.0073780464 | -1.9546028048 | -1.2747661723 |  |
| C3   | -1.7926147563 | -2.5554474660 | -0.3024841987 |  |
| C4   | -2.9947681786 | -1.9820677051 | 0.0786276189  |  |
| C5   | -3.4117466648 | -0.7983863449 | -0.5085881242 |  |
| C6   | -2.6341613668 | -0.1874316139 | -1.4803914269 |  |
| H7   | -0.0765075134 | -2.4114341872 | -1.5813186841 |  |
| H8   | -1.4657916960 | -3.4791299212 | 0.1525084211  |  |
| H9   | -3.6077587354 | -2.4589491355 | 0.8302792243  |  |
| H10  | -4.3503610301 | -0.3502064264 | -0.2165424868 |  |
| H11  | -2.9673760936 | 0.7303316668  | -1.9444891503 |  |
| N17  | -0.6681578025 | -0.1881368497 | -2.9442684213 |  |
| H18  | -0.7156690757 | 0.8306890442  | -2.9581596146 |  |
| H19  | 0.3200019827  | -0.4386302076 | -2.9086334103 |  |
| H15  | -1.0644598431 | -0.5502969464 | -3.8438727279 |  |
| O16  | -1.8599339941 | -1.5281828253 | -4.9875238051 |  |
| S17  | -3.2615919915 | -1.8097346313 | -5.3985246113 |  |
| O18  | -3.3111914754 | -2.4429675004 | -6.7206901293 |  |
| O20  | -4.1089376450 | -0.6178216279 | -5.2873945746 |  |
| C20  | -3.8917056648 | -3.0038319975 | -4.2515551350 |  |
| H21  | -3.8539181461 | -2.5870072971 | -3.2511243769 |  |
| H22  | -4.9182628233 | -3.2225240614 | -4.5303216479 |  |
| H23  | -3.2846129725 | -3.9015851803 | -4.3175576736 |  |

E<sub>tot</sub>(vac) -951.90311284220 hartrees  
Total enthalpy, H<sub>tot</sub> (U<sub>tot</sub> + pV): -951.702411 hartrees  
E<sub>tot</sub>(sol) -951.97792337242 hartrees

### MeSH

final geometry:

|      | angstroms    |               |              |  |
|------|--------------|---------------|--------------|--|
| atom | x            | y             | z            |  |
| S20  | 2.0419665628 | 0.2567851955  | 1.1980632207 |  |
| C21  | 1.9680242525 | 1.1343775418  | 2.8115083462 |  |
| H22  | 2.4226242235 | 0.5345060787  | 3.5986021445 |  |
| H23  | 2.5403079460 | 2.0557901051  | 2.6913352537 |  |
| H24  | 0.9399474146 | 1.3861371299  | 3.0679797982 |  |
| H25  | 1.3098343490 | -0.8312440138 | 1.5185789533 |  |

E<sub>tot</sub>(vac) -438.73132234960 hartrees  
Total enthalpy, H<sub>tot</sub> (U<sub>tot</sub> + pV): -438.679556hartrees  
E<sub>tot</sub>(sol) -438.74790202778hartrees

**PhNHSCF<sub>3</sub>**

final geometry:

|      | angstroms     |               |               |  |
|------|---------------|---------------|---------------|--|
| atom | x             | y             | z             |  |
| C1   | -2.1457879778 | 0.8863314613  | -0.5644325925 |  |
| C2   | -3.4929848844 | 1.0120806131  | -0.2410895631 |  |
| C3   | -4.3897918820 | 0.0249583395  | -0.6080935239 |  |
| C4   | -3.9598892066 | -1.1015051753 | -1.2923513992 |  |
| C5   | -2.6166624189 | -1.2263041847 | -1.6062364832 |  |
| C6   | -1.7113803961 | -0.2415329957 | -1.2500697223 |  |
| H7   | -3.8323251431 | 1.8837773025  | 0.3017470079  |  |
| H8   | -5.4324868779 | 0.1352577289  | -0.3480794163 |  |
| H9   | -4.6617854219 | -1.8713643878 | -1.5761264244 |  |
| H10  | -2.2641905499 | -2.0954216313 | -2.1433222400 |  |
| H11  | -0.6706944272 | -0.3506386178 | -1.5100772528 |  |
| S12  | 0.3444590552  | 1.6957501110  | 0.0853296063  |  |
| C13  | 1.0543167963  | 2.2836698166  | -1.4703730652 |  |
| F14  | 2.3699153152  | 2.1483282852  | -1.3769920022 |  |
| F15  | 0.6444765800  | 1.5975600778  | -2.5271126770 |  |
| F16  | 0.7873364138  | 3.5577456666  | -1.7167813304 |  |
| N17  | -1.2749919402 | 1.9261921861  | -0.2153210567 |  |
| H19  | -1.6851634543 | 2.7174043921  | 0.2535910104  |  |

E<sub>tot</sub>(vac) -1022.81627067316 hartreesTotal enthalpy, H<sub>tot</sub> (U<sub>tot</sub> + pV): -1022.678048 hartreesE<sub>tot</sub>(sol) -1022.82491302671 hartrees

**PhNH<sub>2</sub>SCF<sub>3</sub><sup>+</sup>MeSO<sub>3</sub><sup>-</sup>-Ion Pair**

final geometry:

|      | angstroms     |               |               |  |
|------|---------------|---------------|---------------|--|
| atom | x             | y             | z             |  |
| C1   | -1.1515179130 | 1.3811921695  | -0.7346724079 |  |
| C2   | -1.7745584229 | 1.0134570073  | 0.4418903421  |  |
| C3   | -2.7150862677 | -0.0017715269 | 0.4054072555  |  |
| C4   | -3.0265375267 | -0.6246373257 | -0.7928647666 |  |
| C5   | -2.3997608652 | -0.2310378385 | -1.9626935483 |  |
| C6   | -1.4500407338 | 0.7775443868  | -1.9403634461 |  |
| H7   | -1.5210866796 | 1.4870846390  | 1.3778078445  |  |
| H8   | -3.1989744653 | -0.3115663828 | 1.3199088236  |  |
| H9   | -3.7576963268 | -1.4196143080 | -0.8137899225 |  |
| H10  | -2.6429406634 | -0.7102495790 | -2.8993052482 |  |
| H11  | -0.9621078313 | 1.0903586607  | -2.8514419754 |  |
| S12  | 1.0074645263  | 2.5068268308  | 0.6037599591  |  |
| C13  | 1.6520448054  | 0.7970482748  | 0.5281103055  |  |
| F14  | 2.8403324342  | 0.8333703738  | 1.0967989033  |  |
| F15  | 0.9124482818  | -0.0641017288 | 1.1987144226  |  |
| F16  | 1.7651394383  | 0.3583914193  | -0.7036628990 |  |
| N17  | -0.1328485071 | 2.4417603333  | -0.7538769808 |  |
| H18  | 0.4488476472  | 2.3957946415  | -1.6509749769 |  |
| H19  | -0.5752840008 | 3.3716317342  | -0.7554713937 |  |
| O20  | 1.5216442545  | 2.4190066279  | -2.7773718754 |  |
| S21  | 1.6033713410  | 2.0209846132  | -4.2137842541 |  |
| O22  | 2.5241977881  | 2.8899561292  | -4.9455129072 |  |
| O24  | 0.2678702566  | 1.9204181403  | -4.8105325512 |  |
| C24  | 2.3037548016  | 0.3955845867  | -4.2401186853 |  |
| H25  | 1.6504971706  | -0.2839947535 | -3.7021988259 |  |
| H26  | 2.3847189484  | 0.0932590906  | -5.2802453543 |  |
| H27  | 3.2860708359  | 0.4305062558  | -3.7789305920 |  |

E<sub>tot</sub>(vac) -1687.10713467076 hartreesTotal enthalpy, H<sub>tot</sub> (U<sub>tot</sub> + pV): -1686.896548 hartreesE<sub>tot</sub>(sol) -1687.16153625804 hartrees

## Int

Title: Int1\_M\_IP\_Vib

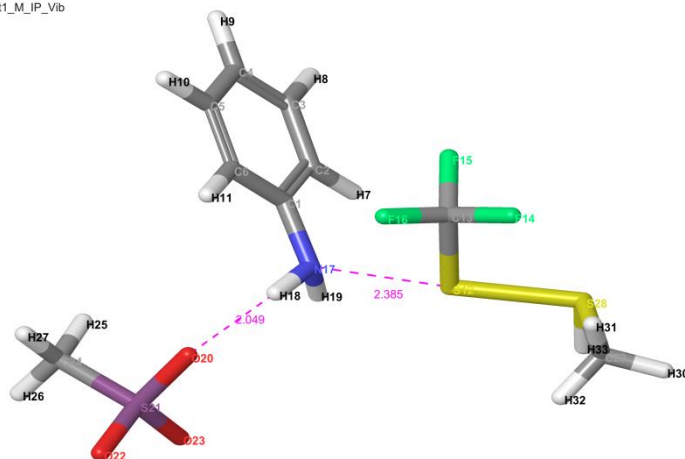

final geometry:

angstroms

| atom | x             | y             | z             |
|------|---------------|---------------|---------------|
| C1   | -0.5101430000 | 0.5569230000  | -0.9327650000 |
| C2   | -1.7848590000 | 0.7352830000  | -0.4106230000 |
| C3   | -2.6546430000 | -0.3379800000 | -0.3281710000 |
| C4   | -2.2730280000 | -1.5925750000 | -0.7778660000 |
| C5   | -1.0080580000 | -1.7645090000 | -1.3155910000 |
| C6   | -0.1272630000 | -0.6999400000 | -1.3910630000 |
| H7   | -2.0879660000 | 1.7077310000  | -0.0488980000 |
| H8   | -3.6415960000 | -0.1929050000 | 0.0870460000  |
| H9   | -2.9582800000 | -2.4256520000 | -0.7158250000 |
| H10  | -0.7041540000 | -2.7335850000 | -1.6857730000 |
| H11  | 0.8546860000  | -0.8417190000 | -1.8194830000 |
| S12  | 1.0920130000  | 2.6746730000  | 1.0728750000  |
| C13  | 1.3933760000  | 0.9816800000  | 1.7353700000  |
| F14  | 2.1755590000  | 1.0231070000  | 2.8121230000  |
| F15  | 0.2745180000  | 0.3829430000  | 2.0815790000  |
| F16  | 2.0035300000  | 0.2408510000  | 0.8461220000  |
| N17  | 0.4110660000  | 1.6255100000  | -0.9583630000 |
| H18  | 1.1918850000  | 1.5161850000  | -1.5997760000 |
| H19  | -0.0512910000 | 2.5009220000  | -1.1652640000 |
| O20  | 2.3202210000  | 1.5991510000  | -3.3081760000 |
| S21  | 2.1298380000  | 2.3813840000  | -4.5455590000 |
| O22  | 3.3642760000  | 2.4736890000  | -5.3401810000 |
| O23  | 1.5265020000  | 3.6970480000  | -4.2818910000 |
| C24  | 0.9645070000  | 1.4813480000  | -5.5274400000 |
| H25  | 0.0459540000  | 1.3780160000  | -4.9594160000 |
| H26  | 0.7834620000  | 2.0388610000  | -6.4410010000 |
| H27  | 1.3868330000  | 0.5066600000  | -5.7516730000 |
| S28  | 1.5136200000  | 3.6678660000  | 3.0429020000  |
| C29  | 3.2963630000  | 3.9757330000  | 3.1214630000  |
| H30  | 3.4786420000  | 4.6477310000  | 3.9553330000  |
| H31  | 3.7646600000  | 3.0196190000  | 3.3244320000  |
| H32  | 3.6571870000  | 4.3850090000  | 2.1860700000  |
| H33  | 1.0873130000  | 4.8658280000  | 2.5811870000  |

$E_{\text{tot}}(\text{vac})$  -2125.80158074047 hartrees  
 Total enthalpy,  $H_{\text{tot}}$  ( $U_{\text{tot}} + pV$ ): -2125.537581 hartrees  
 $E_{\text{tot}}(\text{sol})$  -2125.887264

Charge on MeSH moiety (NBO): +0.561  
 N-S-S bond angle: 174.2°

Summary of Natural Population Analysis:

| Atom No   | Natural Population |          |           |         | Total     |
|-----------|--------------------|----------|-----------|---------|-----------|
|           | Natural Charge     | Core     | Valence   | Rydberg |           |
| C 1       | 0.12465            | 1.99911  | 3.85401   | 0.02223 | 5.87535   |
| C 2       | -0.23265           | 1.99917  | 4.21679   | 0.01669 | 6.23265   |
| C 3       | -0.19281           | 1.99930  | 4.17585   | 0.01767 | 6.19281   |
| C 4       | -0.20991           | 1.99928  | 4.19297   | 0.01765 | 6.20991   |
| C 5       | -0.18852           | 1.99930  | 4.17169   | 0.01754 | 6.18852   |
| C 6       | -0.21433           | 1.99918  | 4.19790   | 0.01725 | 6.21433   |
| H 7       | 0.21092            | 0.00000  | 0.78751   | 0.00157 | 0.78908   |
| H 8       | 0.21495            | 0.00000  | 0.78360   | 0.00145 | 0.78505   |
| H 9       | 0.21662            | 0.00000  | 0.78219   | 0.00119 | 0.78338   |
| H 10      | 0.21943            | 0.00000  | 0.77919   | 0.00138 | 0.78057   |
| H 11      | 0.24088            | 0.00000  | 0.75760   | 0.00152 | 0.75912   |
| S 12      | 0.17389            | 9.99938  | 5.79220   | 0.03452 | 15.82611  |
| C 13      | 0.93638            | 1.99985  | 2.98478   | 0.07900 | 5.06362   |
| F 14      | -0.35773           | 1.99991  | 7.35060   | 0.00723 | 9.35773   |
| F 15      | -0.32881           | 1.99990  | 7.32076   | 0.00816 | 9.32881   |
| F 16      | -0.31747           | 1.99990  | 7.30918   | 0.00839 | 9.31747   |
| N 17      | -0.76474           | 1.99941  | 5.74097   | 0.02436 | 7.76474   |
| H 18      | 0.47827            | 0.00000  | 0.51948   | 0.00225 | 0.52173   |
| H 19      | 0.40307            | 0.00000  | 0.59472   | 0.00221 | 0.59693   |
| O 20      | -1.09246           | 1.99978  | 7.07940   | 0.01328 | 9.09246   |
| S 21      | 2.34845            | 9.99920  | 3.42417   | 0.22819 | 13.65155  |
| O 22      | -1.01397           | 1.99981  | 7.00186   | 0.01229 | 9.01397   |
| O 23      | -1.04056           | 1.99981  | 7.02815   | 0.01259 | 9.04056   |
| C 24      | -0.83740           | 1.99938  | 4.81876   | 0.01926 | 6.83740   |
| H 25      | 0.21042            | 0.00000  | 0.78841   | 0.00117 | 0.78958   |
| H 26      | 0.22962            | 0.00000  | 0.76950   | 0.00088 | 0.77038   |
| H 27      | 0.22272            | 0.00000  | 0.77629   | 0.00099 | 0.77728   |
| S 28      | 0.34518            | 9.99921  | 5.61227   | 0.04335 | 15.65482  |
| C 29      | -0.71158           | 1.99937  | 4.69837   | 0.01383 | 6.71158   |
| H 30      | 0.24529            | 0.00000  | 0.75374   | 0.00097 | 0.75471   |
| H 31      | 0.25718            | 0.00000  | 0.74186   | 0.00096 | 0.74282   |
| H 32      | 0.25178            | 0.00000  | 0.74721   | 0.00101 | 0.74822   |
| H 33      | 0.17324            | 0.00000  | 0.82106   | 0.00570 | 0.82676   |
| =====     |                    |          |           |         |           |
| * Total * | 0.00000            | 61.99024 | 111.37305 | 0.63671 | 174.00000 |

**TS**

Title: PS\_M\_IP\_Vib

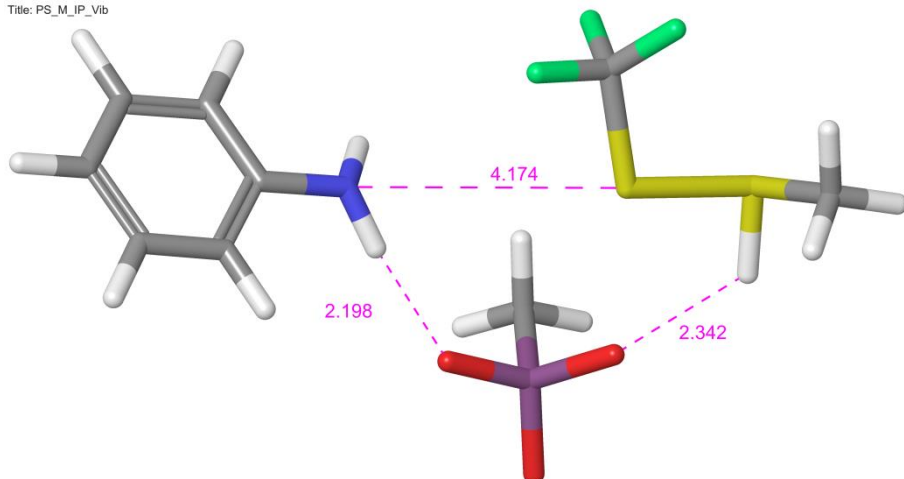

final geometry:

|      | angstroms     |               |               |  |
|------|---------------|---------------|---------------|--|
| atom | x             | y             | z             |  |
| C1   | -1.3694468786 | -1.0817687195 | -1.2478466763 |  |
| C2   | -2.7280310260 | -1.1149787456 | -0.9172996853 |  |
| C3   | -3.4624667057 | -2.2794907861 | -1.0583150125 |  |
| C4   | -2.8720792190 | -3.4433508437 | -1.5271774074 |  |
| C5   | -1.5230344660 | -3.4189838740 | -1.8472993464 |  |
| C6   | -0.7790488590 | -2.2606954142 | -1.7121455415 |  |
| H7   | -3.2105310498 | -0.2198441605 | -0.5491740074 |  |
| H8   | -4.5129097201 | -2.2751591854 | -0.8015361510 |  |
| H9   | -3.4514125730 | -4.3470760961 | -1.6447489883 |  |
| H10  | -1.0418502138 | -4.3125706719 | -2.2200247754 |  |
| H11  | 0.2713456090  | -2.2633927168 | -1.9668682181 |  |
| S12  | 2.1762095097  | 2.6850934622  | 0.5801098302  |  |
| C13  | 0.9321575535  | 2.7150870117  | 1.9133837804  |  |
| F14  | 1.4083273096  | 3.0092320602  | 3.1068135149  |  |
| F15  | -0.0764163959 | 3.5276162443  | 1.6781009404  |  |
| F16  | 0.5003548800  | 1.4718893266  | 1.8996088672  |  |
| N17  | -0.6262859038 | 0.0661390278  | -1.0848609952 |  |
| H18  | 0.2303255078  | 0.1896095287  | -1.6051861212 |  |
| H19  | -1.1660683808 | 0.9111297727  | -1.0446179661 |  |
| O20  | 1.7835010825  | 1.0913750301  | -2.8747219812 |  |
| S21  | 2.5211111132  | 2.3538362456  | -3.0357879162 |  |
| O22  | 3.3304483325  | 2.3845327850  | -4.2609771082 |  |
| O23  | 3.3262681850  | 2.7206757917  | -1.8468074954 |  |
| C24  | 1.2852746762  | 3.6160292083  | -3.1954044205 |  |
| H25  | 0.6838399021  | 3.6211263740  | -2.2918194395 |  |
| H26  | 1.7785182096  | 4.5741028746  | -3.3254445040 |  |
| H27  | 0.6674828655  | 3.3845220579  | -4.0573161931 |  |
| S28  | 3.1297467529  | 4.5189999983  | 0.8712932255  |  |
| C29  | 4.4386601894  | 4.1752147220  | 2.0637828353  |  |
| H30  | 5.0402817752  | 5.0804534845  | 2.1132786152  |  |
| H31  | 3.9480584050  | 4.0084298202  | 3.0177402286  |  |
| H32  | 5.0166276734  | 3.3119568069  | 1.7563388190  |  |
| H33  | 3.8142920528  | 4.4313238393  | -0.3007311538 |  |



$E_{\text{tot}}(\text{vac})$  -2125.80752098714 hartrees  
 Total enthalpy,  $H_{\text{tot}} (U_{\text{tot}} + pV)$ : -2125.544819 hartrees  
 $E_{\text{tot}}(\text{sol})$  -2125.87846166324 hartrees

Charge on MeSH moiety (NBO): +0.775

Summary of Natural Population Analysis:

| Natural   |          | Natural Population |           |         |           | Total |
|-----------|----------|--------------------|-----------|---------|-----------|-------|
| Atom No   | Charge   | Core               | Valence   | Rydberg |           |       |
| C 1       | 0.18020  | 1.99917            | 3.80094   | 0.01970 | 5.81980   |       |
| C 2       | -0.27630 | 1.99919            | 4.26019   | 0.01692 | 6.27630   |       |
| C 3       | -0.18720 | 1.99930            | 4.17008   | 0.01783 | 6.18720   |       |
| C 4       | -0.26925 | 1.99927            | 4.25104   | 0.01893 | 6.26925   |       |
| C 5       | -0.18341 | 1.99930            | 4.16642   | 0.01770 | 6.18341   |       |
| C 6       | -0.26340 | 1.99918            | 4.24705   | 0.01717 | 6.26340   |       |
| H 7       | 0.19870  | 0.00000            | 0.79940   | 0.00189 | 0.80130   |       |
| H 8       | 0.20375  | 0.00000            | 0.79473   | 0.00152 | 0.79625   |       |
| H 9       | 0.20689  | 0.00000            | 0.79174   | 0.00137 | 0.79311   |       |
| H 10      | 0.20625  | 0.00000            | 0.79226   | 0.00149 | 0.79375   |       |
| H 11      | 0.21682  | 0.00000            | 0.78153   | 0.00165 | 0.78318   |       |
| S 12      | 0.25963  | 9.99935            | 5.69812   | 0.04290 | 15.74037  |       |
| C 13      | 0.90455  | 1.99985            | 3.01619   | 0.07941 | 5.09545   |       |
| F 14      | -0.34582 | 1.99990            | 7.33912   | 0.00680 | 9.34582   |       |
| F 15      | -0.33307 | 1.99990            | 7.32614   | 0.00703 | 9.33307   |       |
| F 16      | -0.31363 | 1.99990            | 7.30482   | 0.00891 | 9.31363   |       |
| N 17      | -0.82862 | 1.99948            | 5.80867   | 0.02047 | 7.82862   |       |
| H 18      | 0.42719  | 0.00000            | 0.57077   | 0.00204 | 0.57281   |       |
| H 19      | 0.36426  | 0.00000            | 0.63353   | 0.00221 | 0.63574   |       |
| O 20      | -1.03036 | 1.99980            | 7.01754   | 0.01302 | 9.03036   |       |
| S 21      | 2.35296  | 9.99917            | 3.42158   | 0.22628 | 13.64704  |       |
| O 22      | -0.99221 | 1.99981            | 6.98002   | 0.01238 | 8.99221   |       |
| O 23      | -1.10134 | 1.99978            | 7.08613   | 0.01542 | 9.10134   |       |
| C 24      | -0.83898 | 1.99938            | 4.82013   | 0.01948 | 6.83898   |       |
| H 25      | 0.20591  | 0.00000            | 0.79285   | 0.00124 | 0.79409   |       |
| H 26      | 0.21909  | 0.00000            | 0.77987   | 0.00103 | 0.78091   |       |
| H 27      | 0.24252  | 0.00000            | 0.75666   | 0.00082 | 0.75748   |       |
| S 28      | 0.45282  | 9.99909            | 5.49638   | 0.05171 | 15.54718  |       |
| C 29      | -0.71600 | 1.99939            | 4.70121   | 0.01540 | 6.71600   |       |
| H 30      | 0.25159  | 0.00000            | 0.74739   | 0.00102 | 0.74841   |       |
| H 31      | 0.25900  | 0.00000            | 0.73996   | 0.00104 | 0.74100   |       |
| H 32      | 0.26436  | 0.00000            | 0.73467   | 0.00097 | 0.73564   |       |
| H 33      | 0.26310  | 0.00000            | 0.73075   | 0.00615 | 0.73690   |       |
| =====     |          |                    |           |         |           |       |
| * Total * | 0.00000  | 61.99021           | 111.35788 | 0.65191 | 174.00000 |       |

**MeSSCF3**

final geometry:

|      | angstroms     |               |               |  |
|------|---------------|---------------|---------------|--|
| atom | x             | y             | z             |  |
| S20  | 2.5730558424  | -0.2614434485 | 1.4716059681  |  |
| C21  | 1.4987956731  | 1.0046988424  | 2.1770462552  |  |
| H22  | 1.2541926086  | 0.7727773290  | 3.2077946154  |  |
| H23  | 2.0818044695  | 1.9230184325  | 2.1445820566  |  |
| H24  | 0.5997954205  | 1.1264342037  | 1.5849546678  |  |
| S6   | 1.4969041174  | -1.9880156080 | 1.7096059292  |  |
| C7   | 0.5945510807  | -2.0623561752 | 0.1473300808  |  |
| F8   | -0.1730324762 | -3.1413037434 | 0.1853788705  |  |
| F9   | -0.1835322748 | -1.0100268079 | -0.0533070814 |  |
| F10  | 1.3850292390  | -2.1629032301 | -0.9085451424 |  |

 $E_{\text{tot}}(\text{vac})$  -1173.97478928869 hartreesTotal enthalpy,  $H_{\text{tot}}$  ( $U_{\text{tot}} + pV$ ): -1173.909419 hartrees $E_{\text{tot}}(\text{sol})$  -1173.97804457676 hartrees
