# Supplementary material for: Electrophilic trifluoromethylthiolation of thiols with trifluoromethanesulfenamide
Source: Royal Society of Chemistry journal article supplement (doi:10.1039/c5ra07316b), 2015-01-01
Supplement: c5ra07316b2.pdf [file c5ra07316b2.pdf]

Supporting Information

**Electrophilic Trifluoromethylthiolation of Thiols with  
Trifluoromethanesulfenamide**

**Marjan Jereb\* and Darko Dolenc**

*Department of Organic Chemistry, Faculty of Chemistry and Chemical Technology, Večna pot 113,  
1001 Ljubljana, Slovenia*

(marjan.jereb@fkkt.uni-lj.si)

**Copies of  $^1\text{H}$ ,  $^{13}\text{C}$  and  $^{19}\text{F}$  NMR spectra**

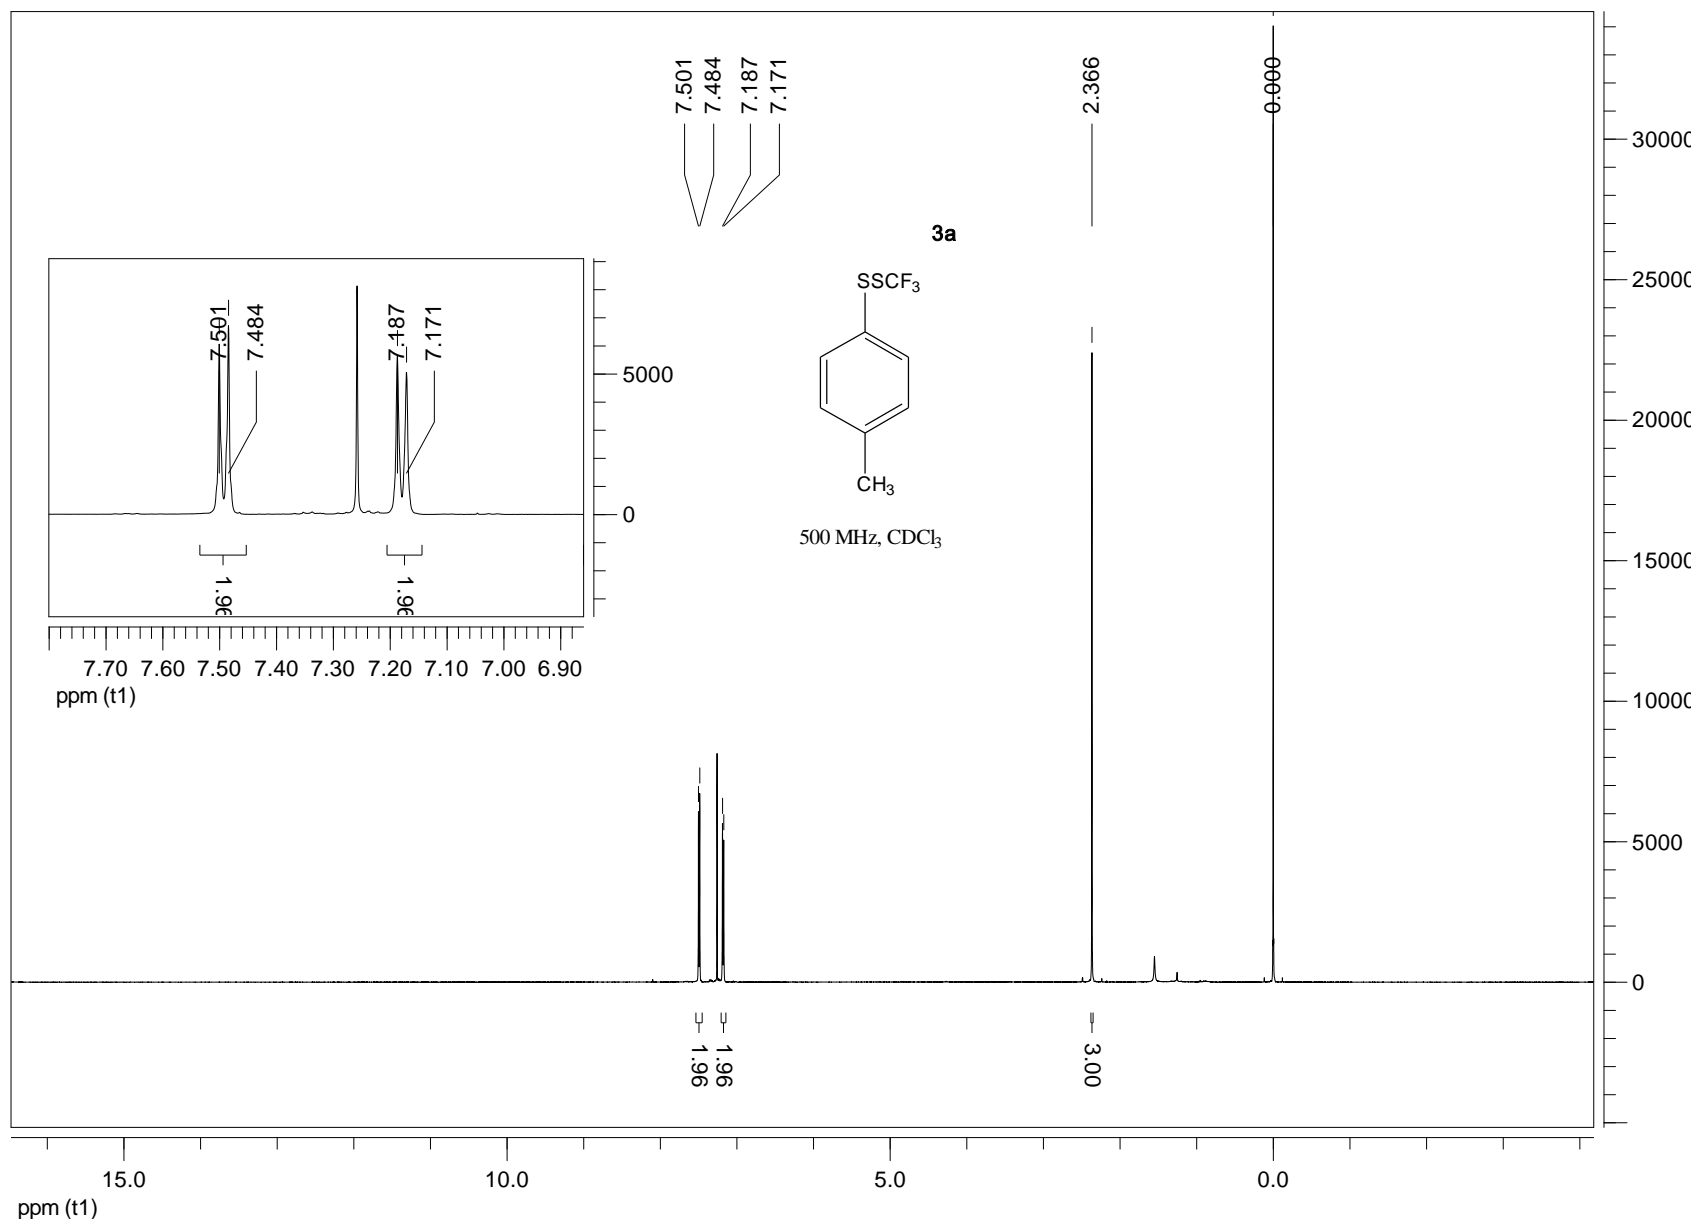

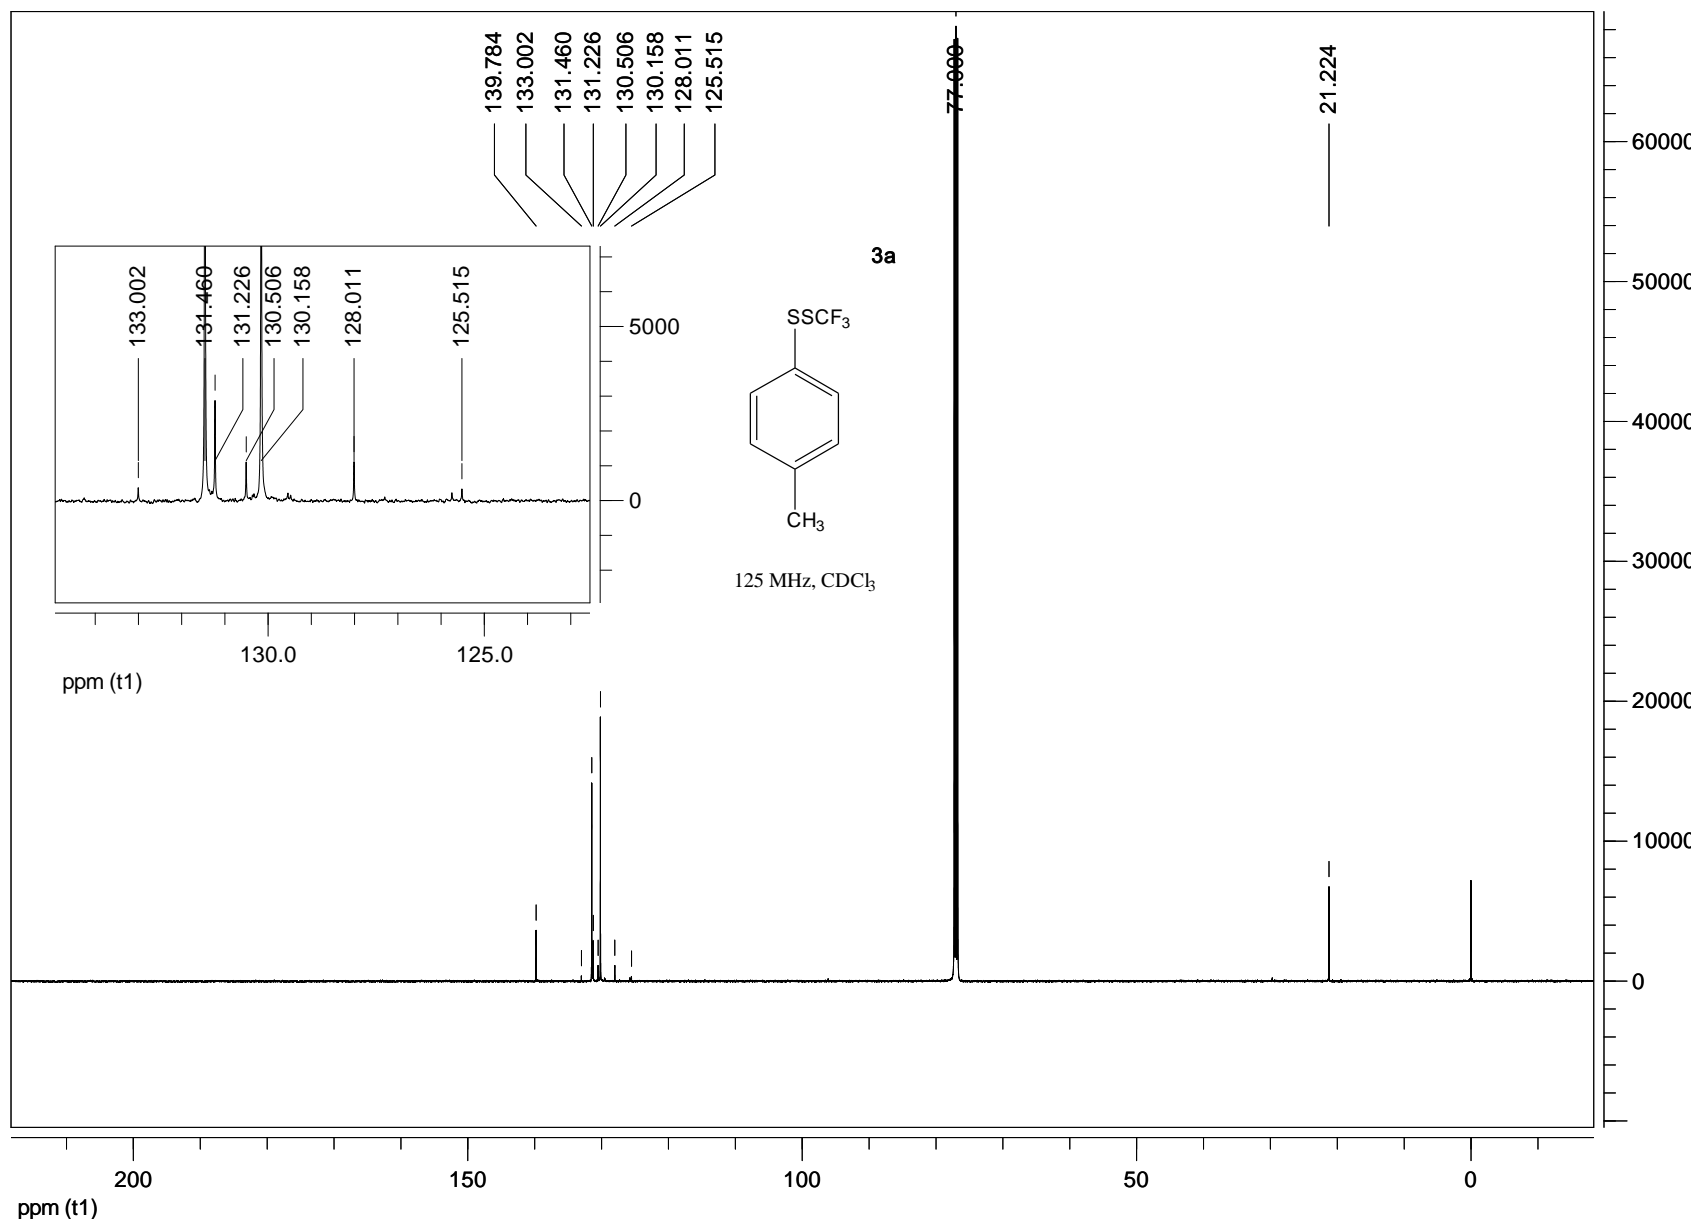

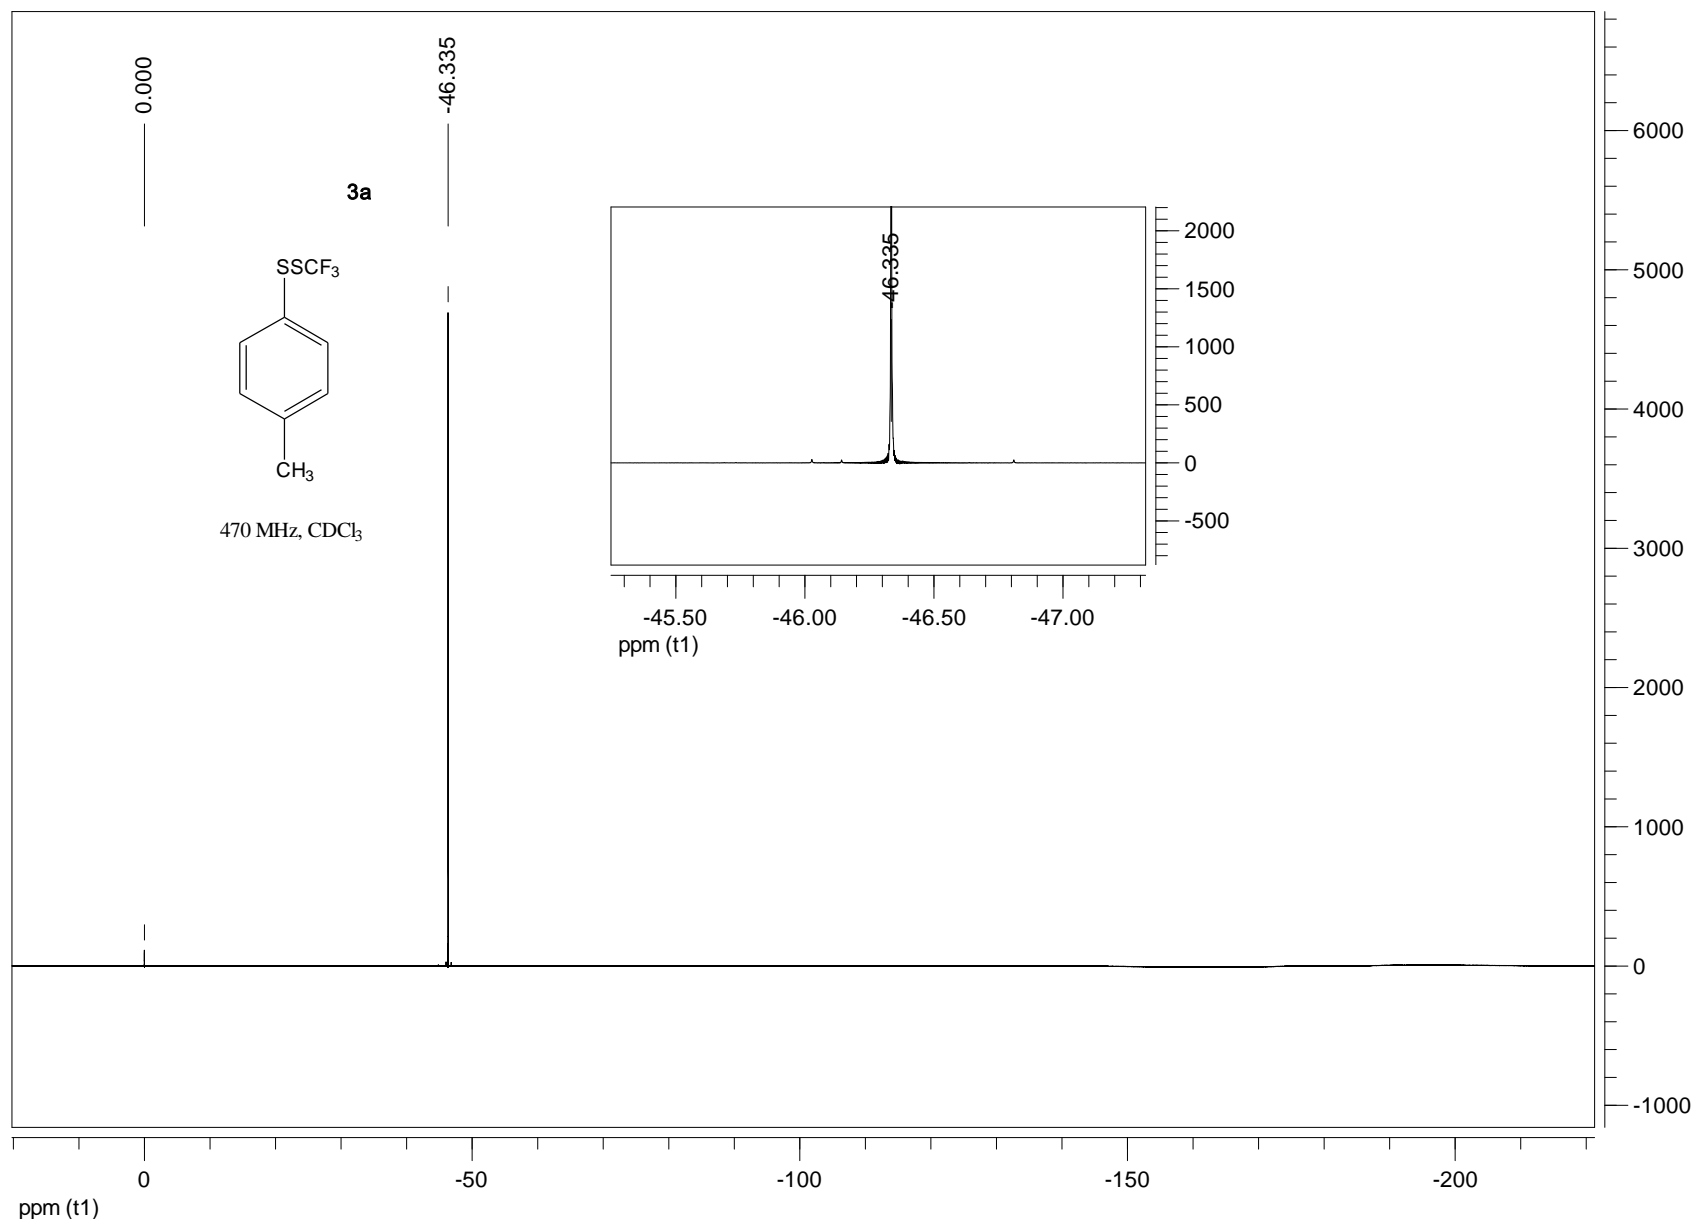



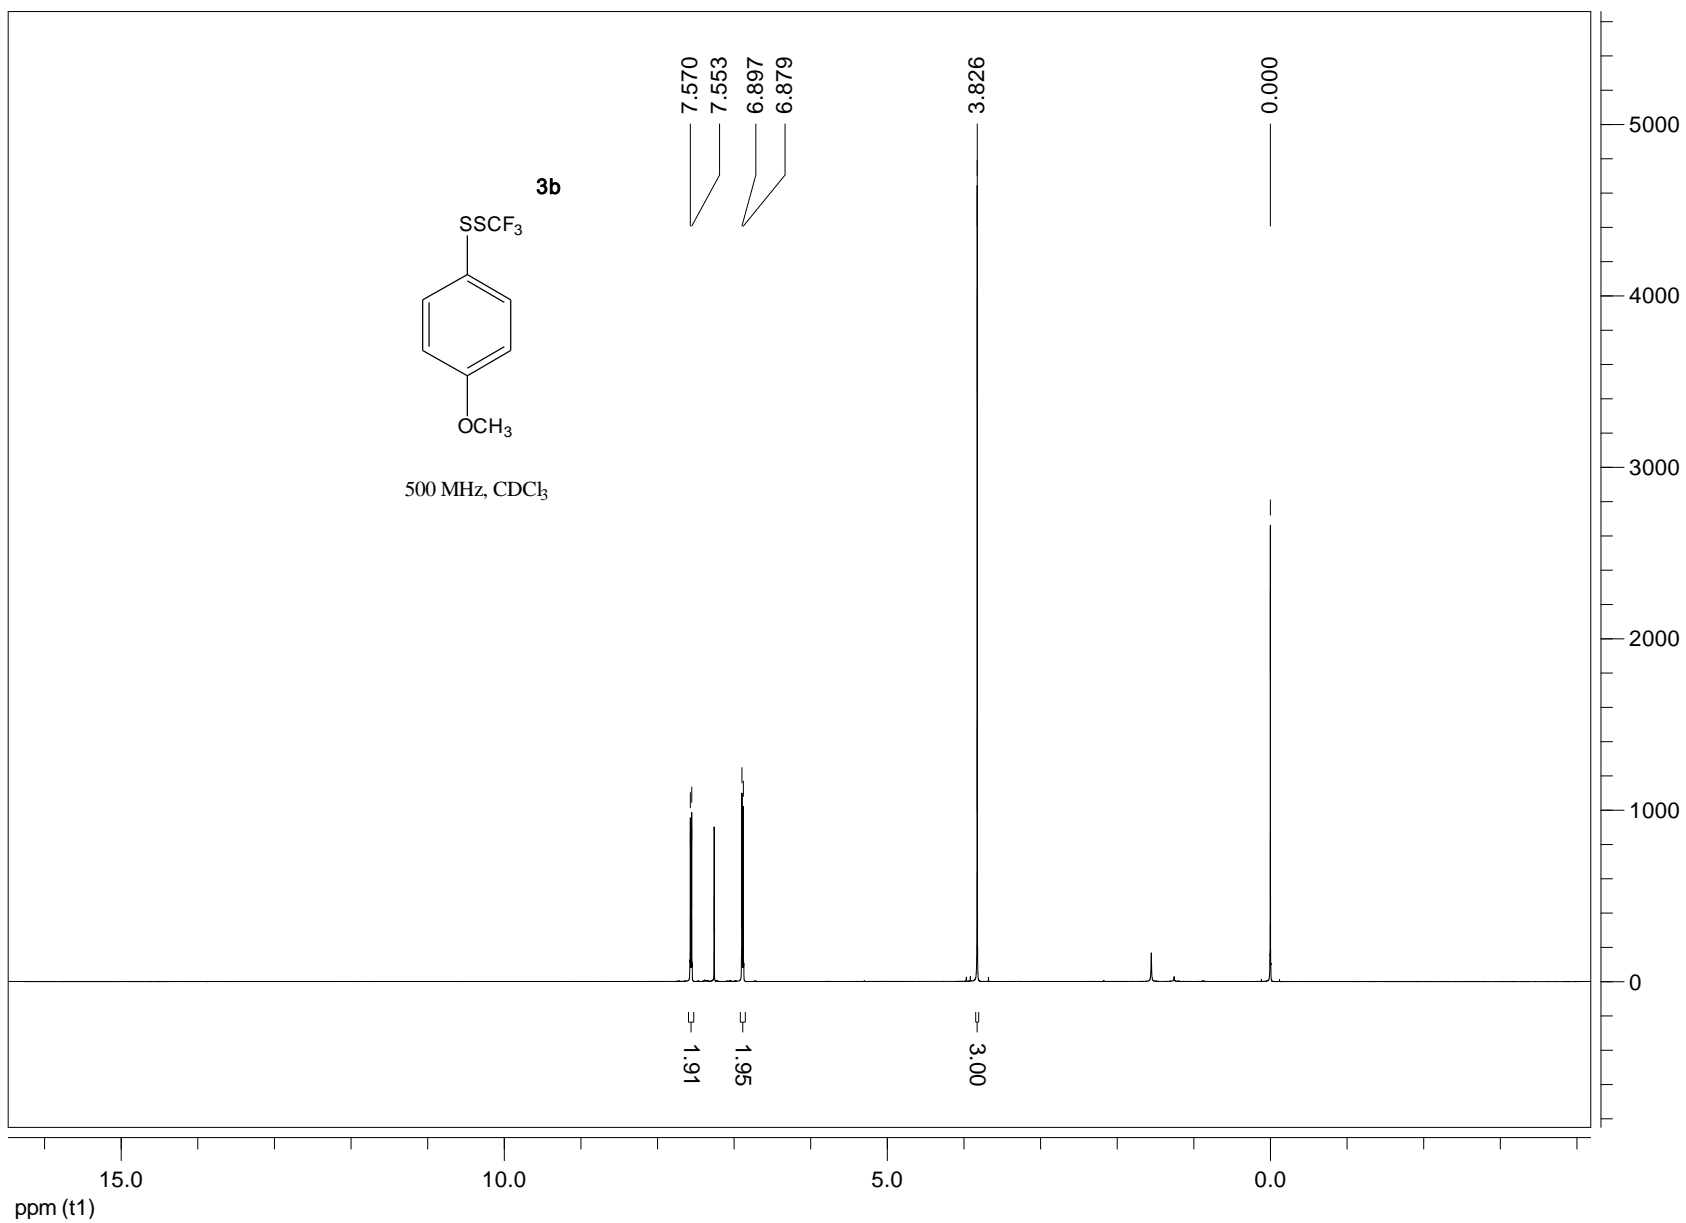

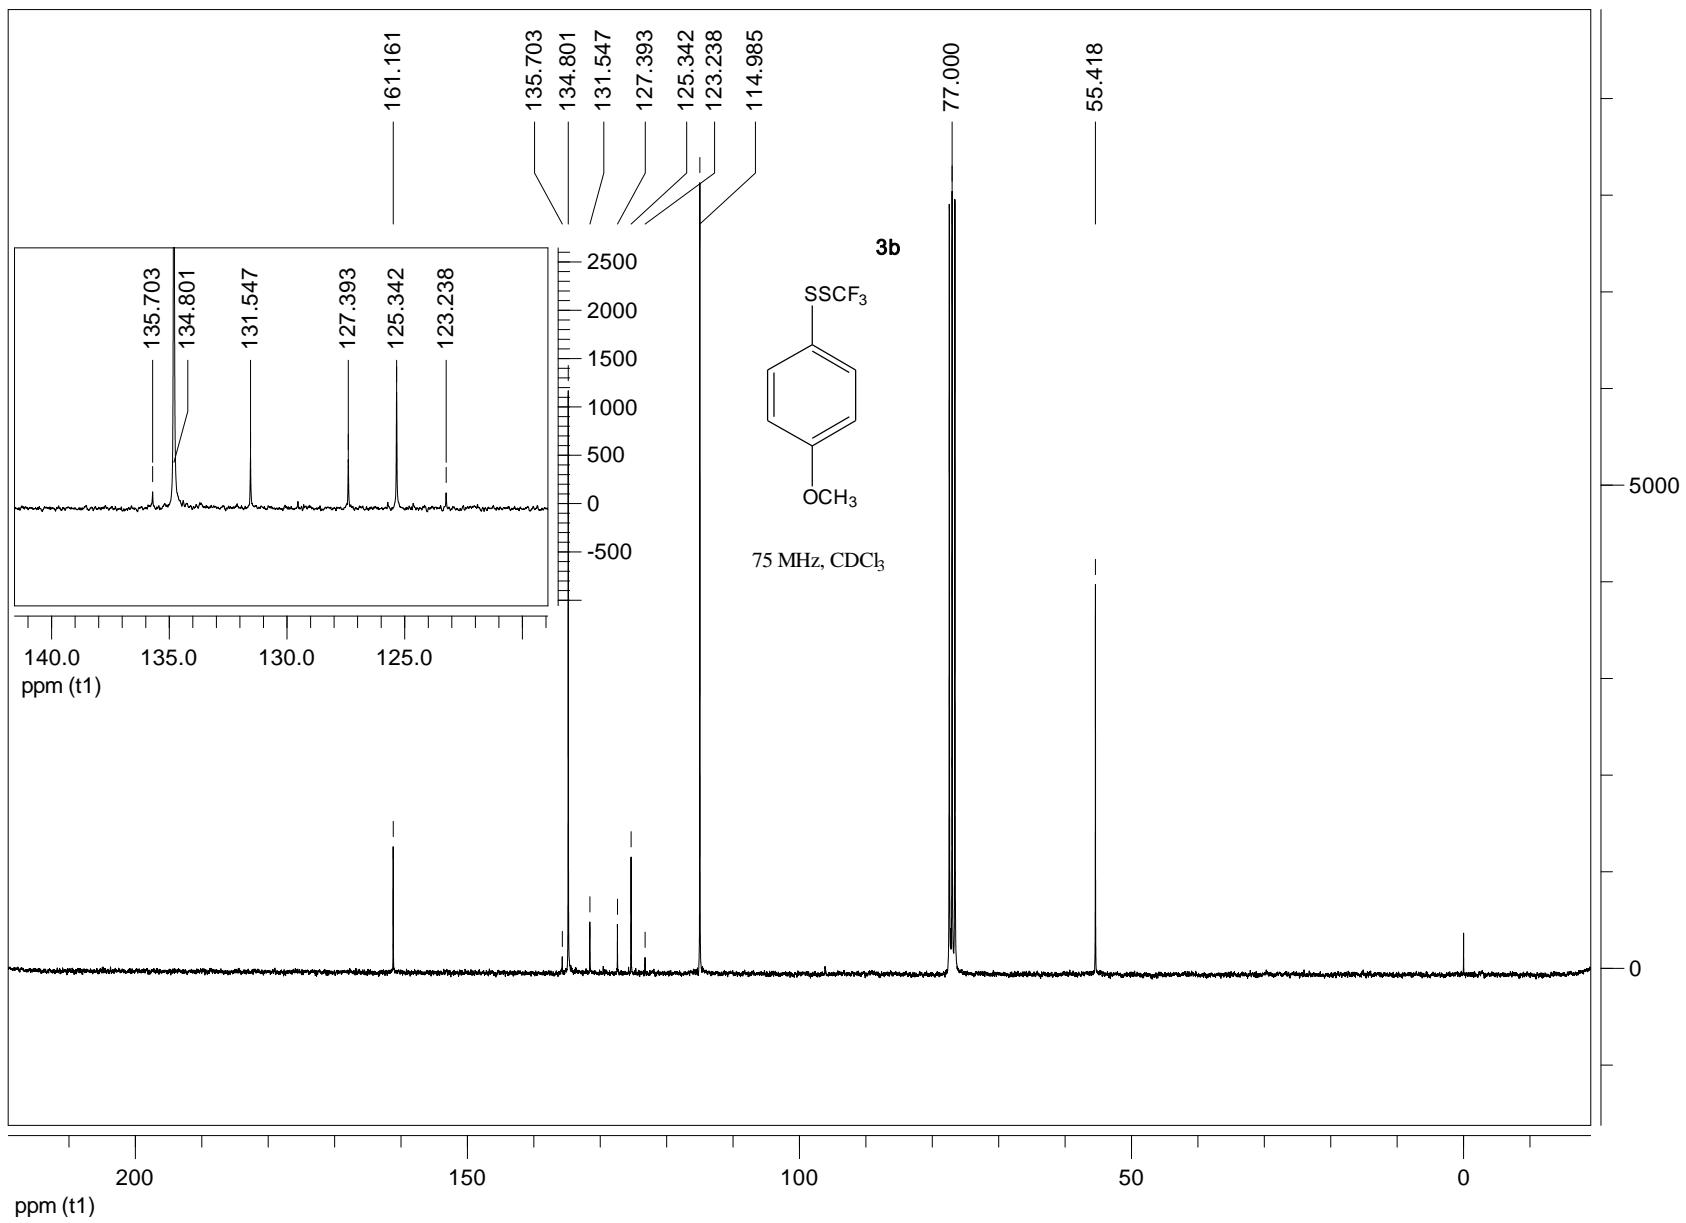

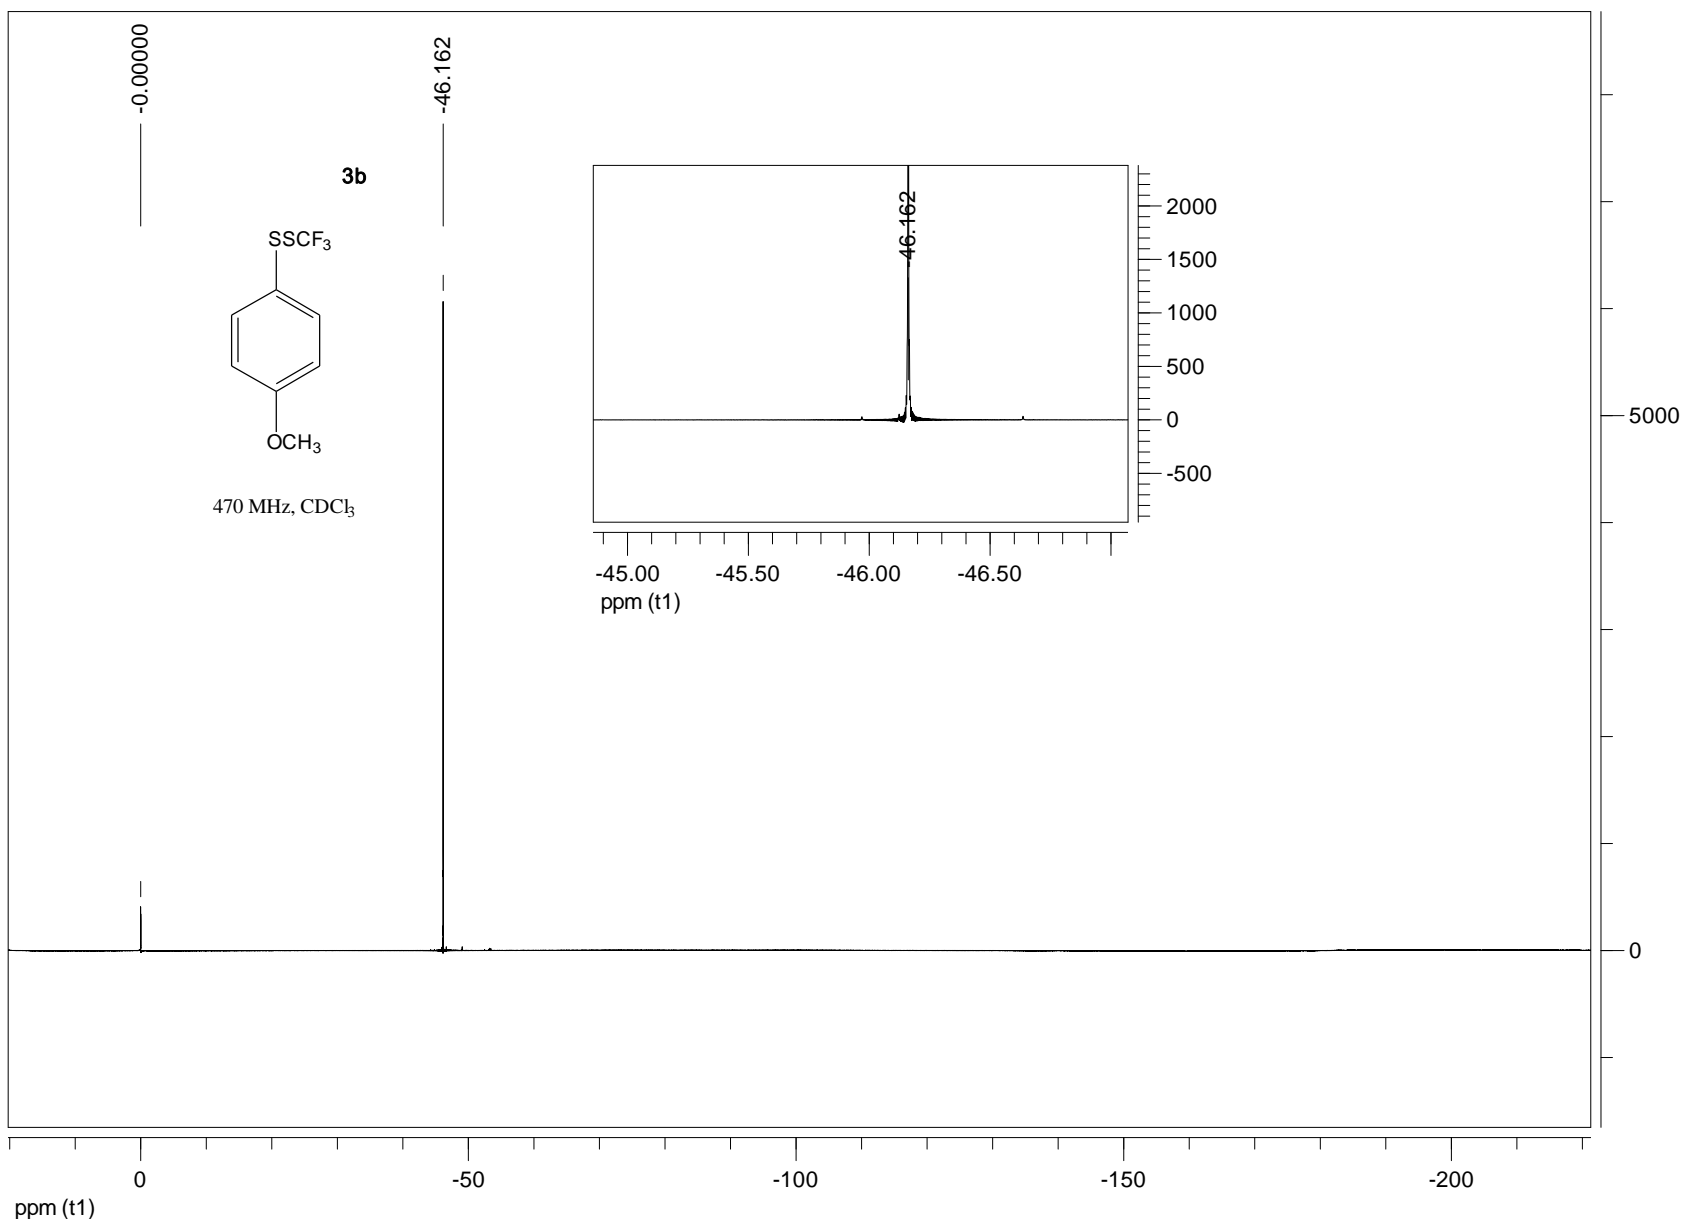

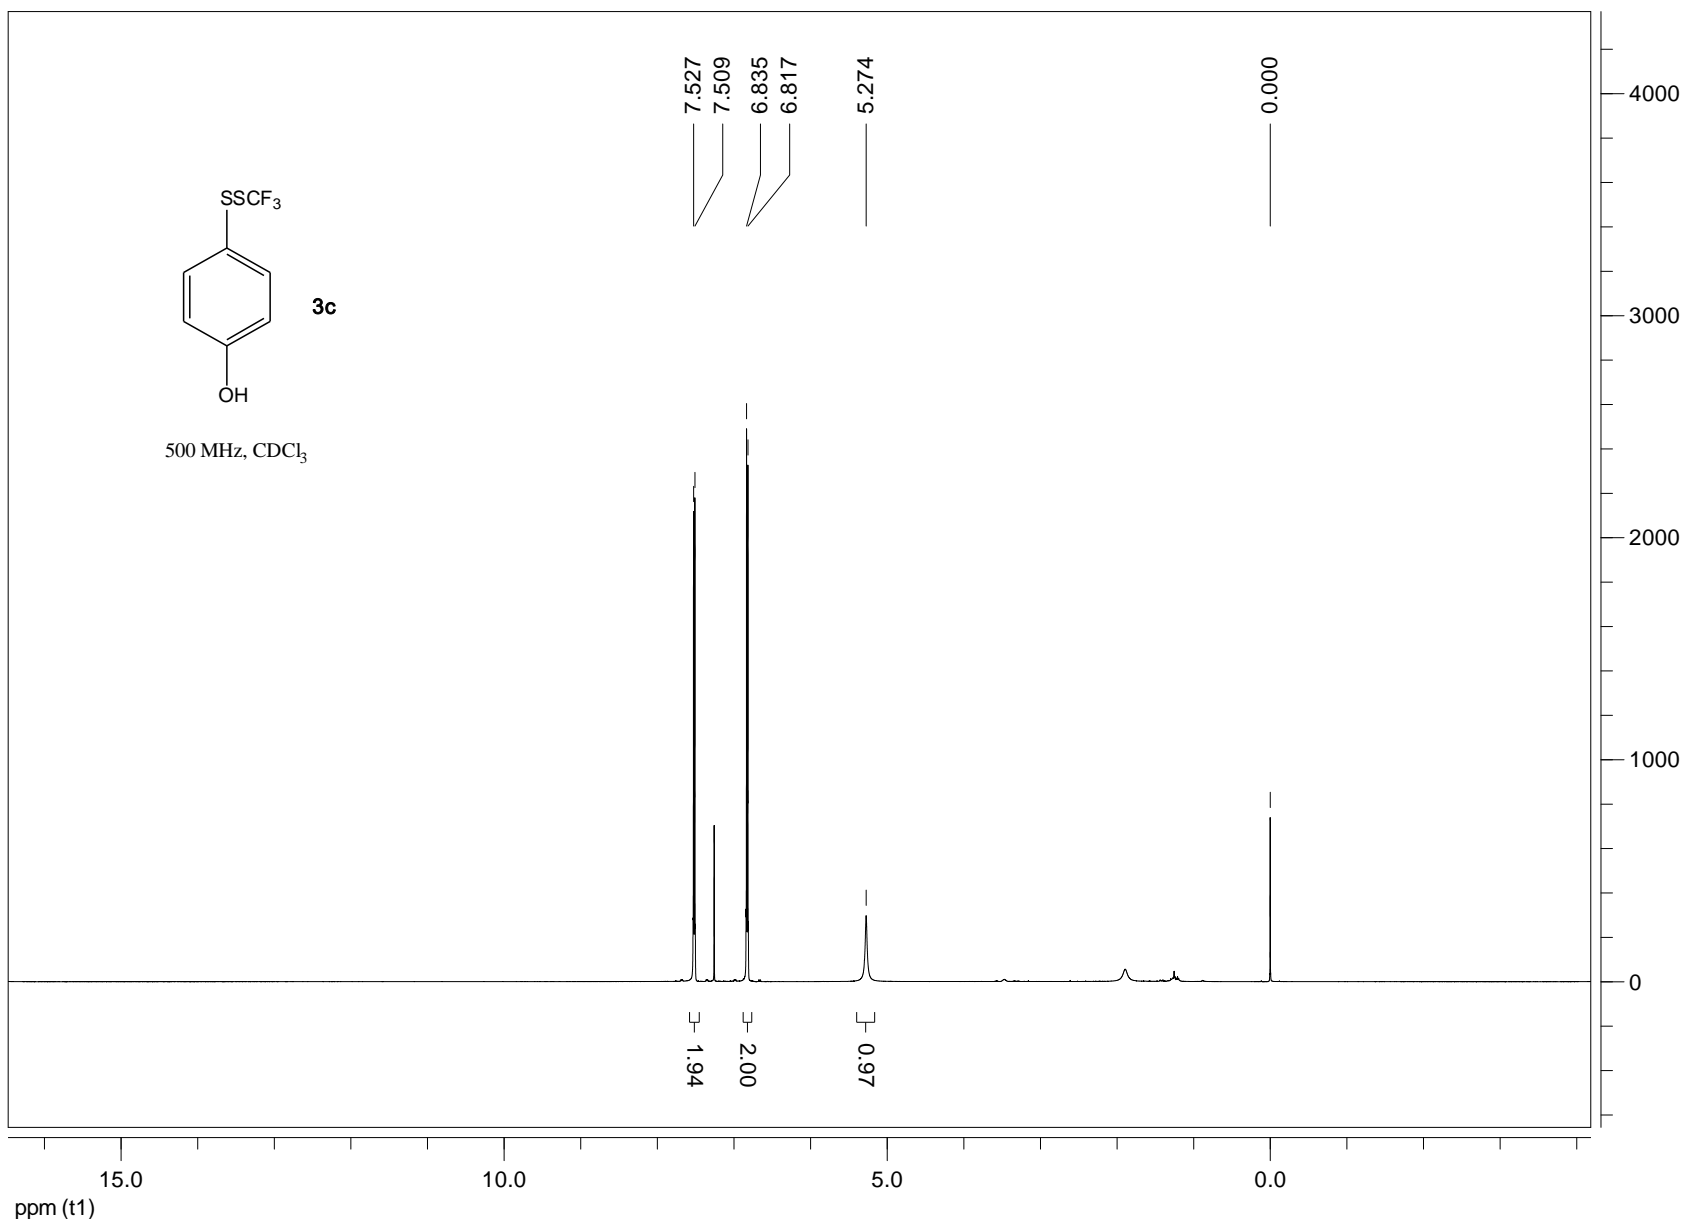

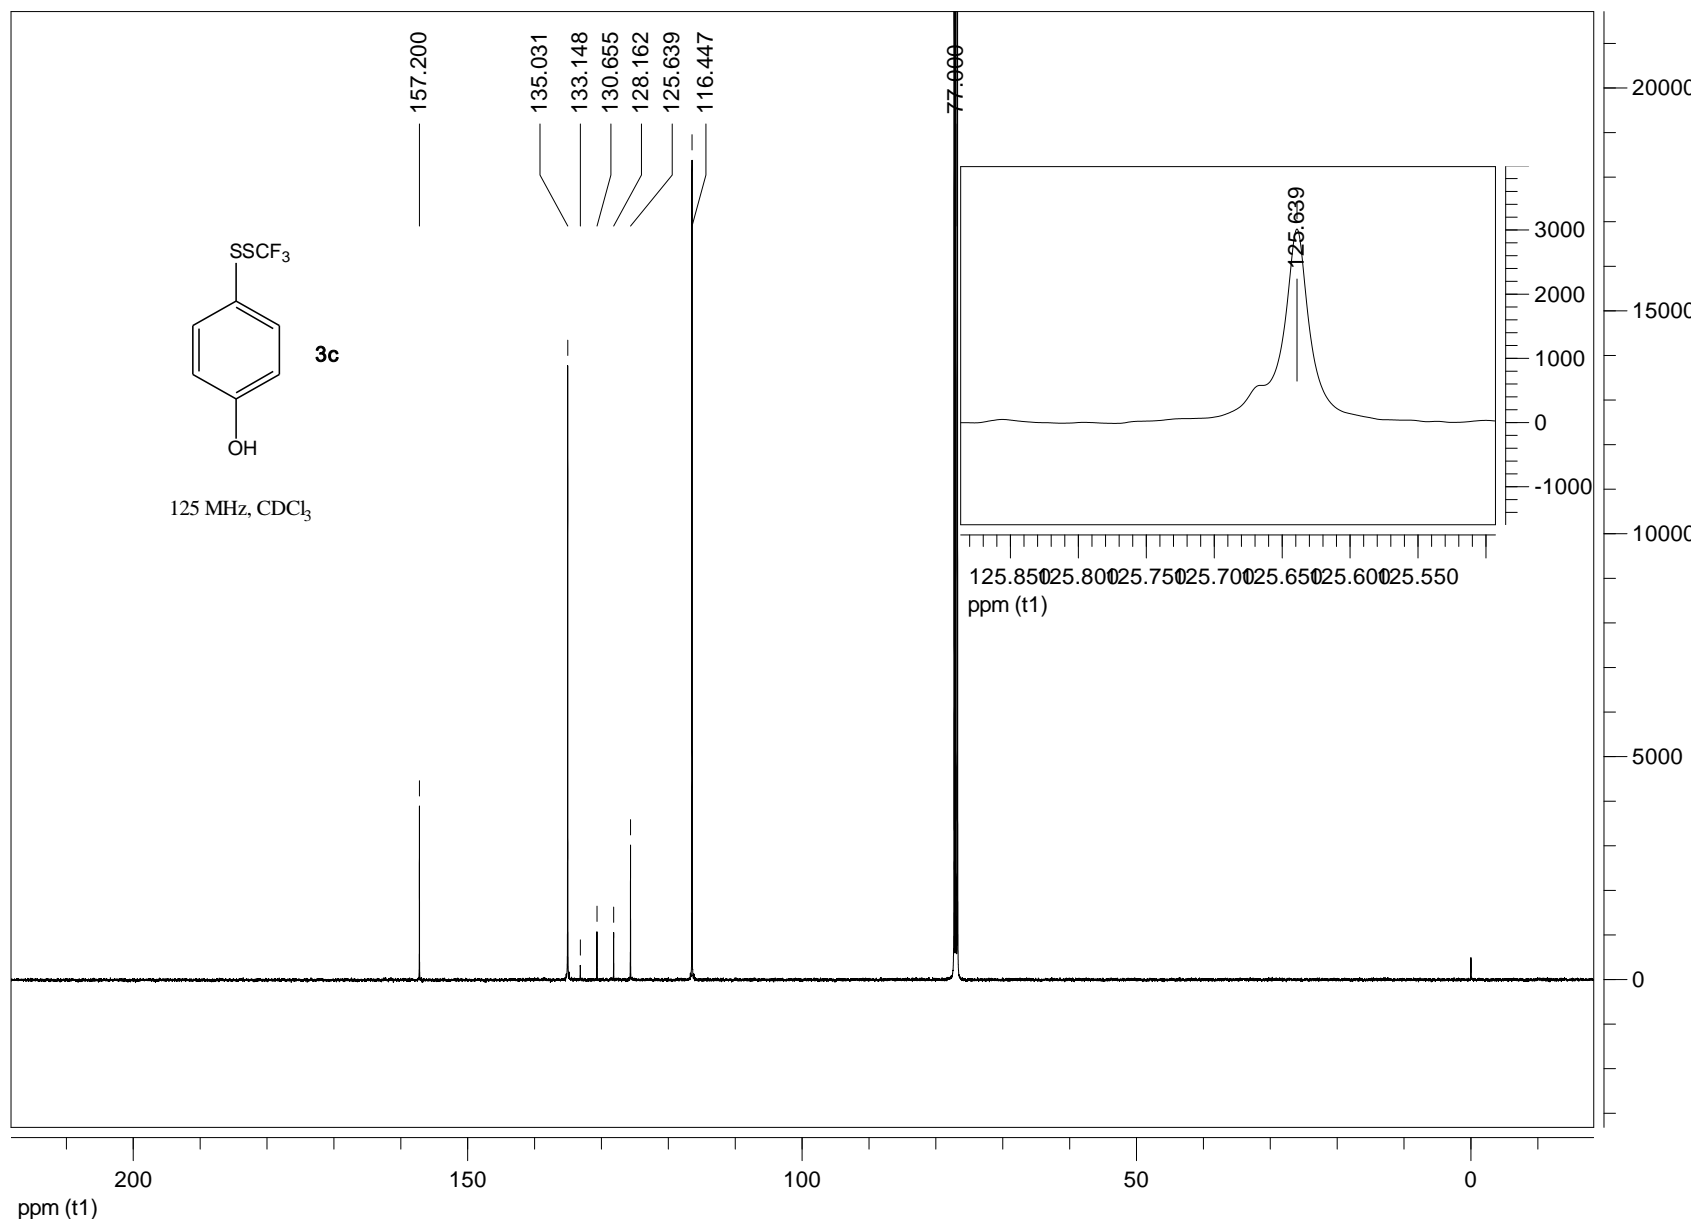

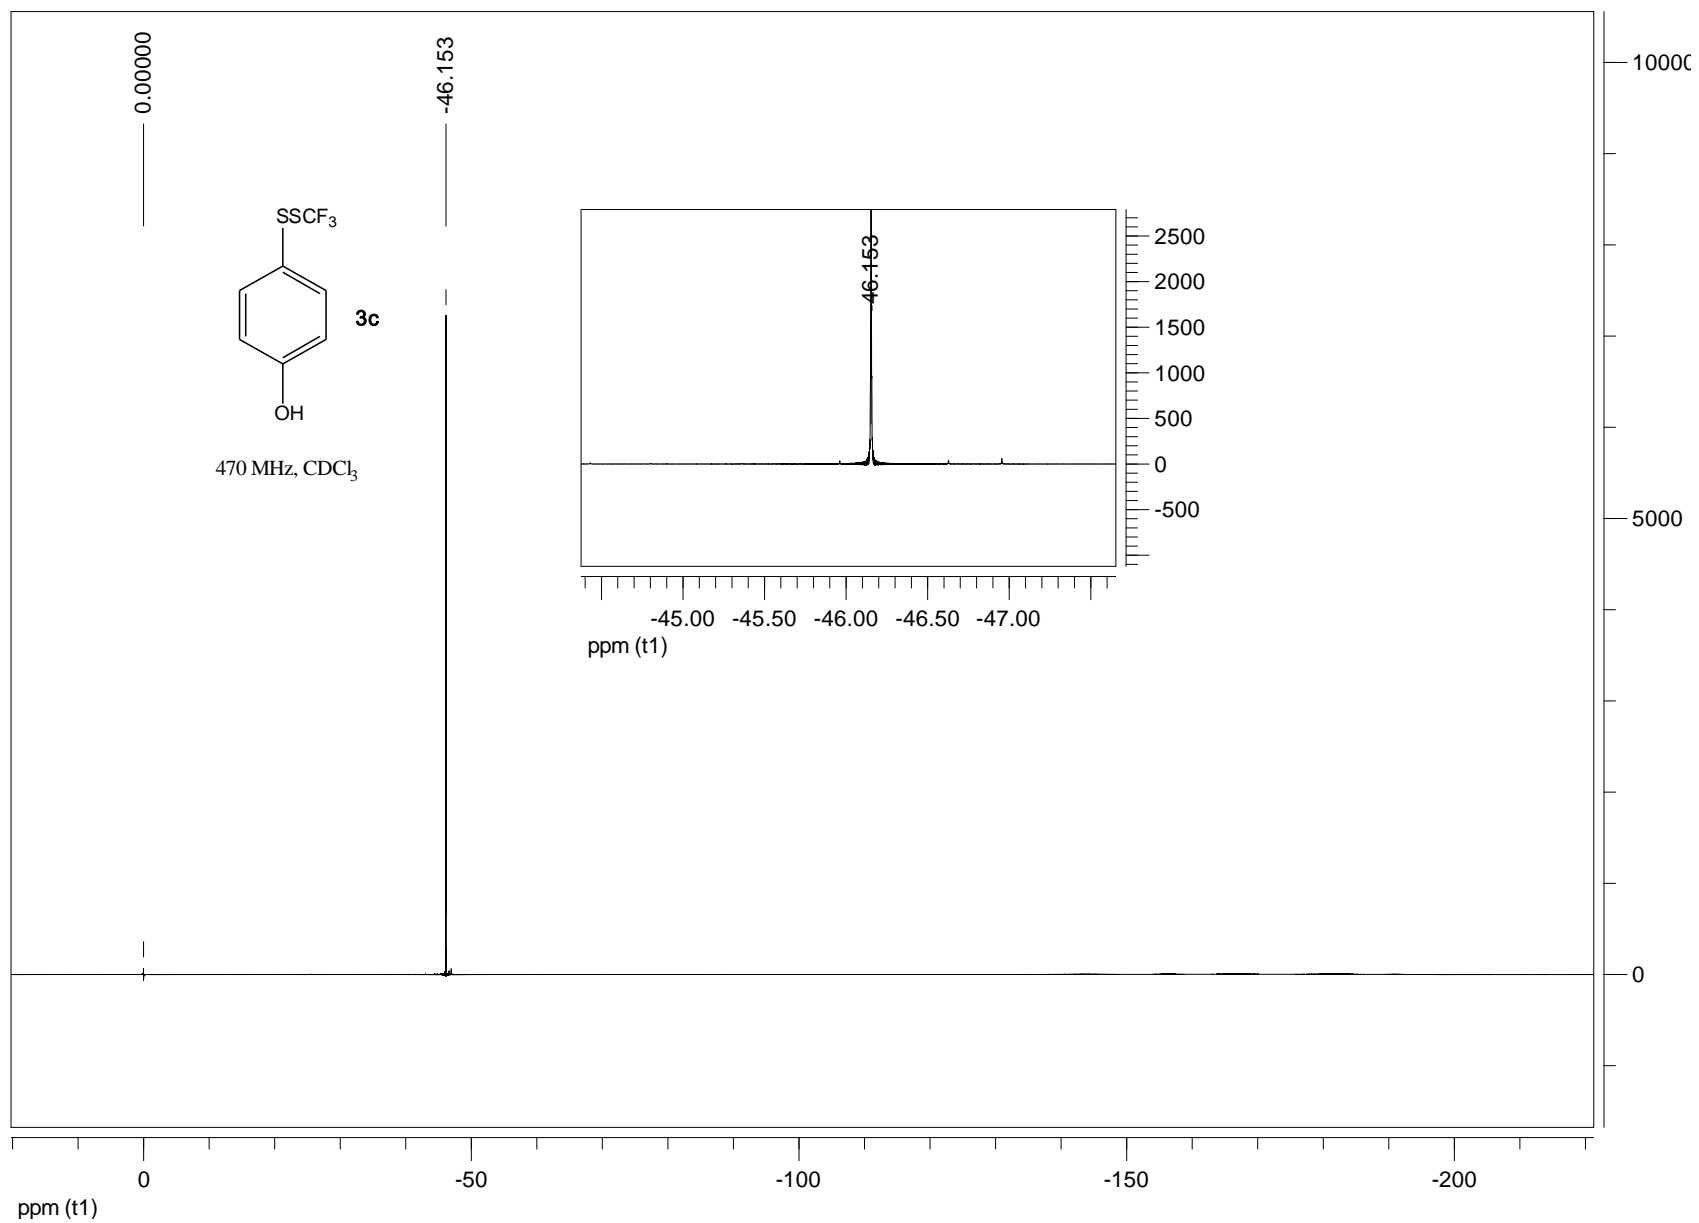

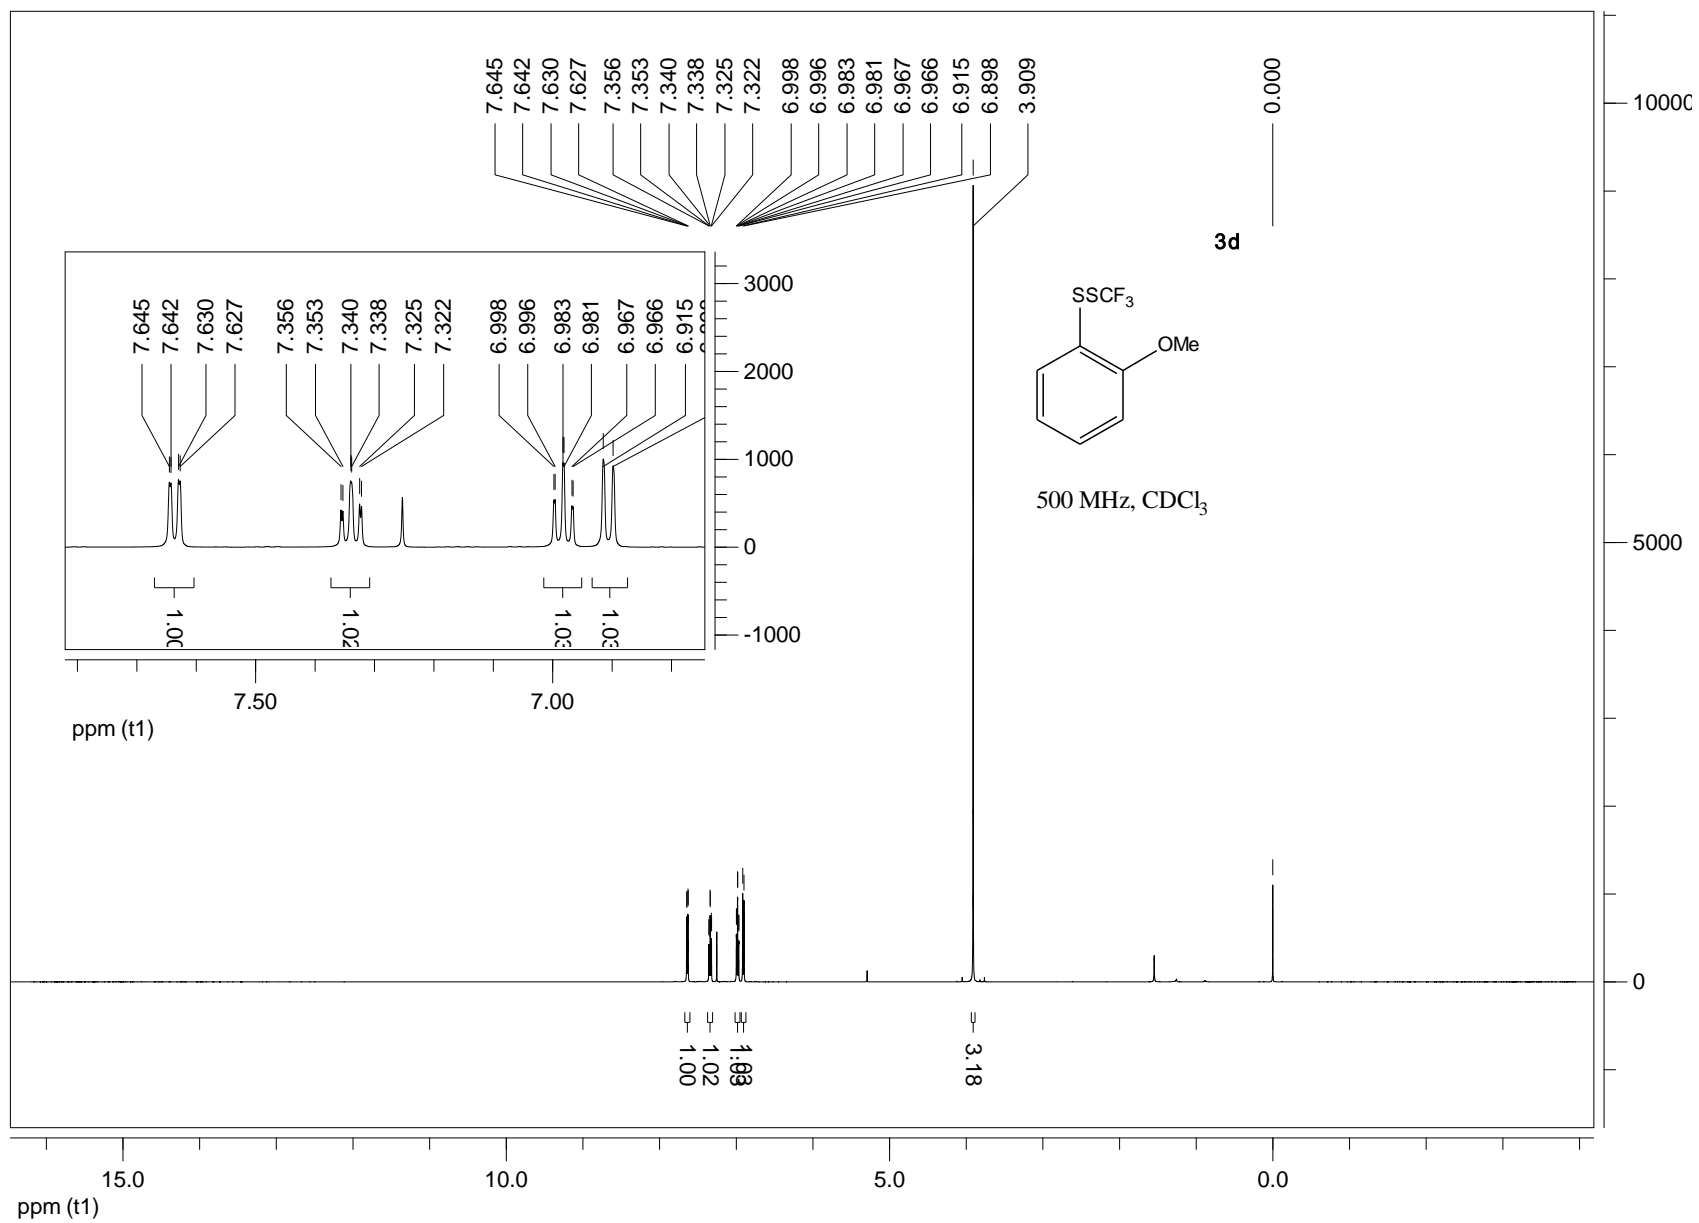

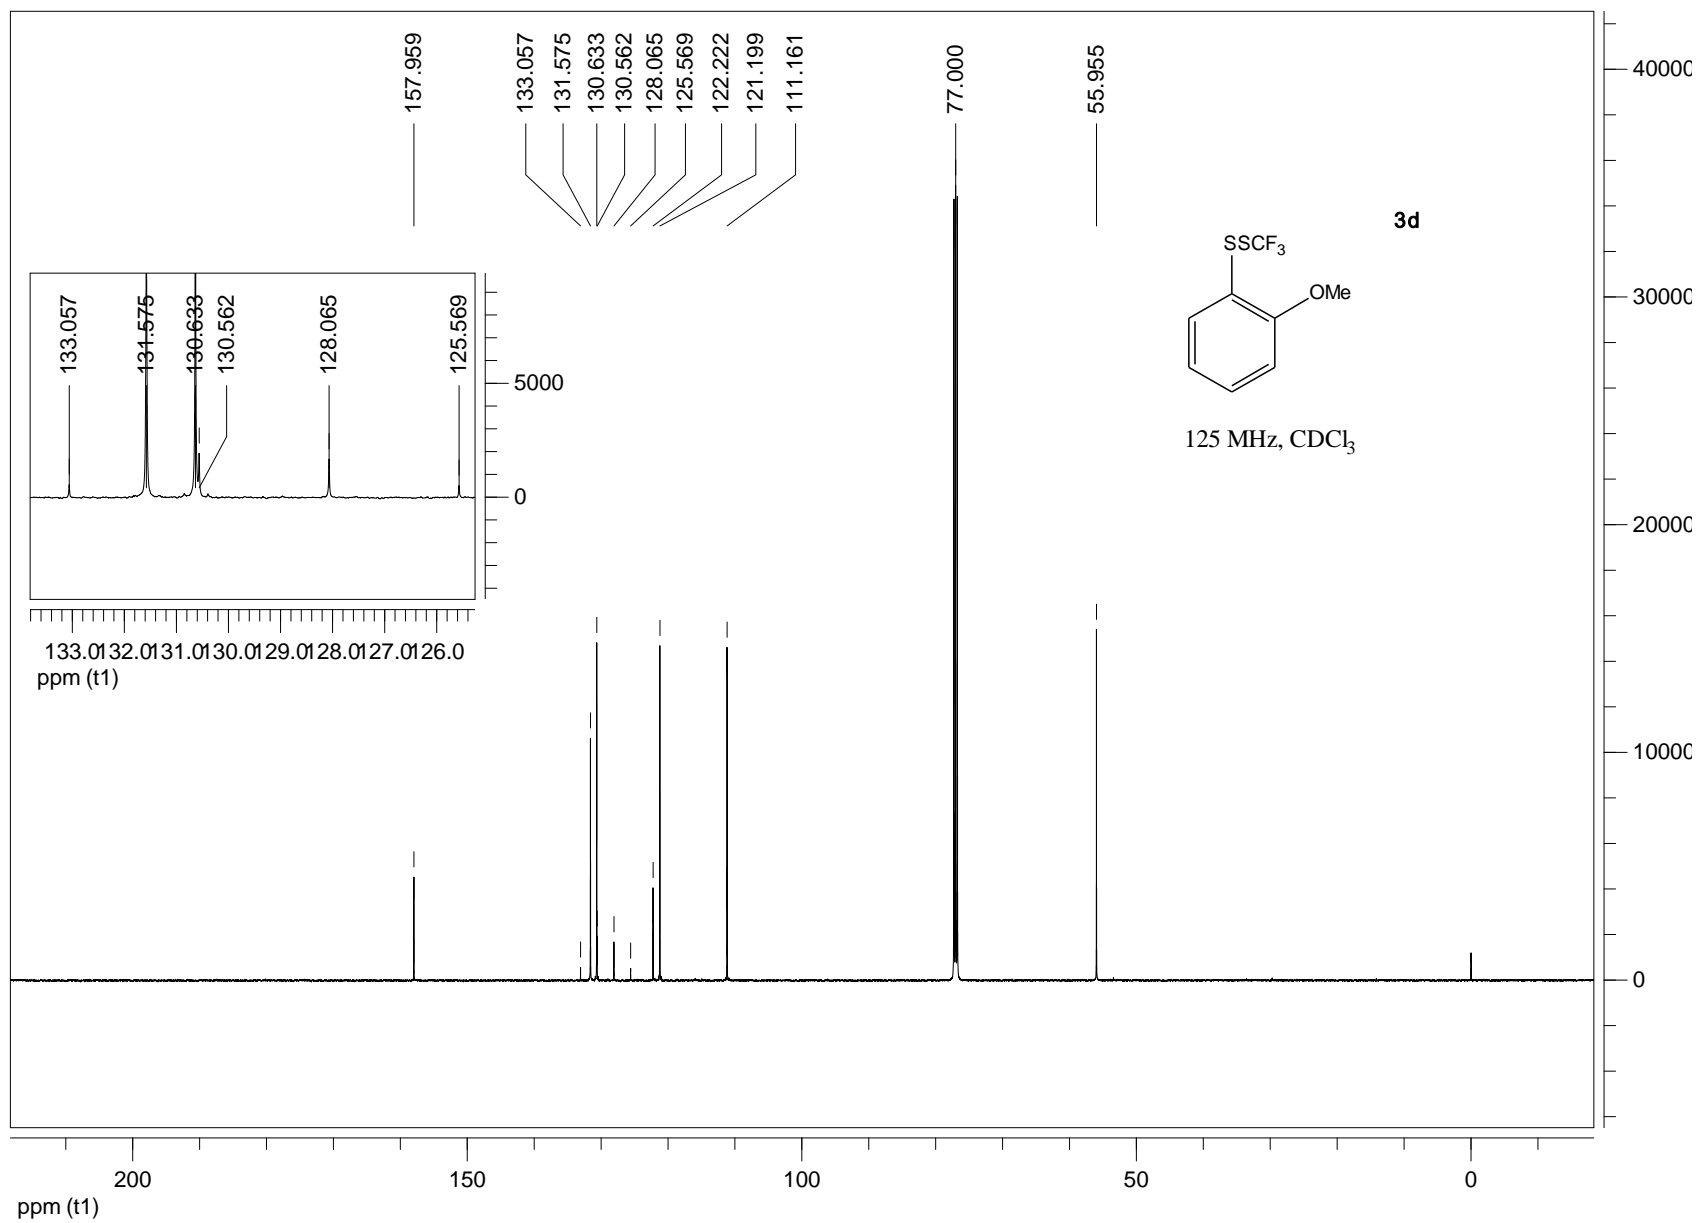



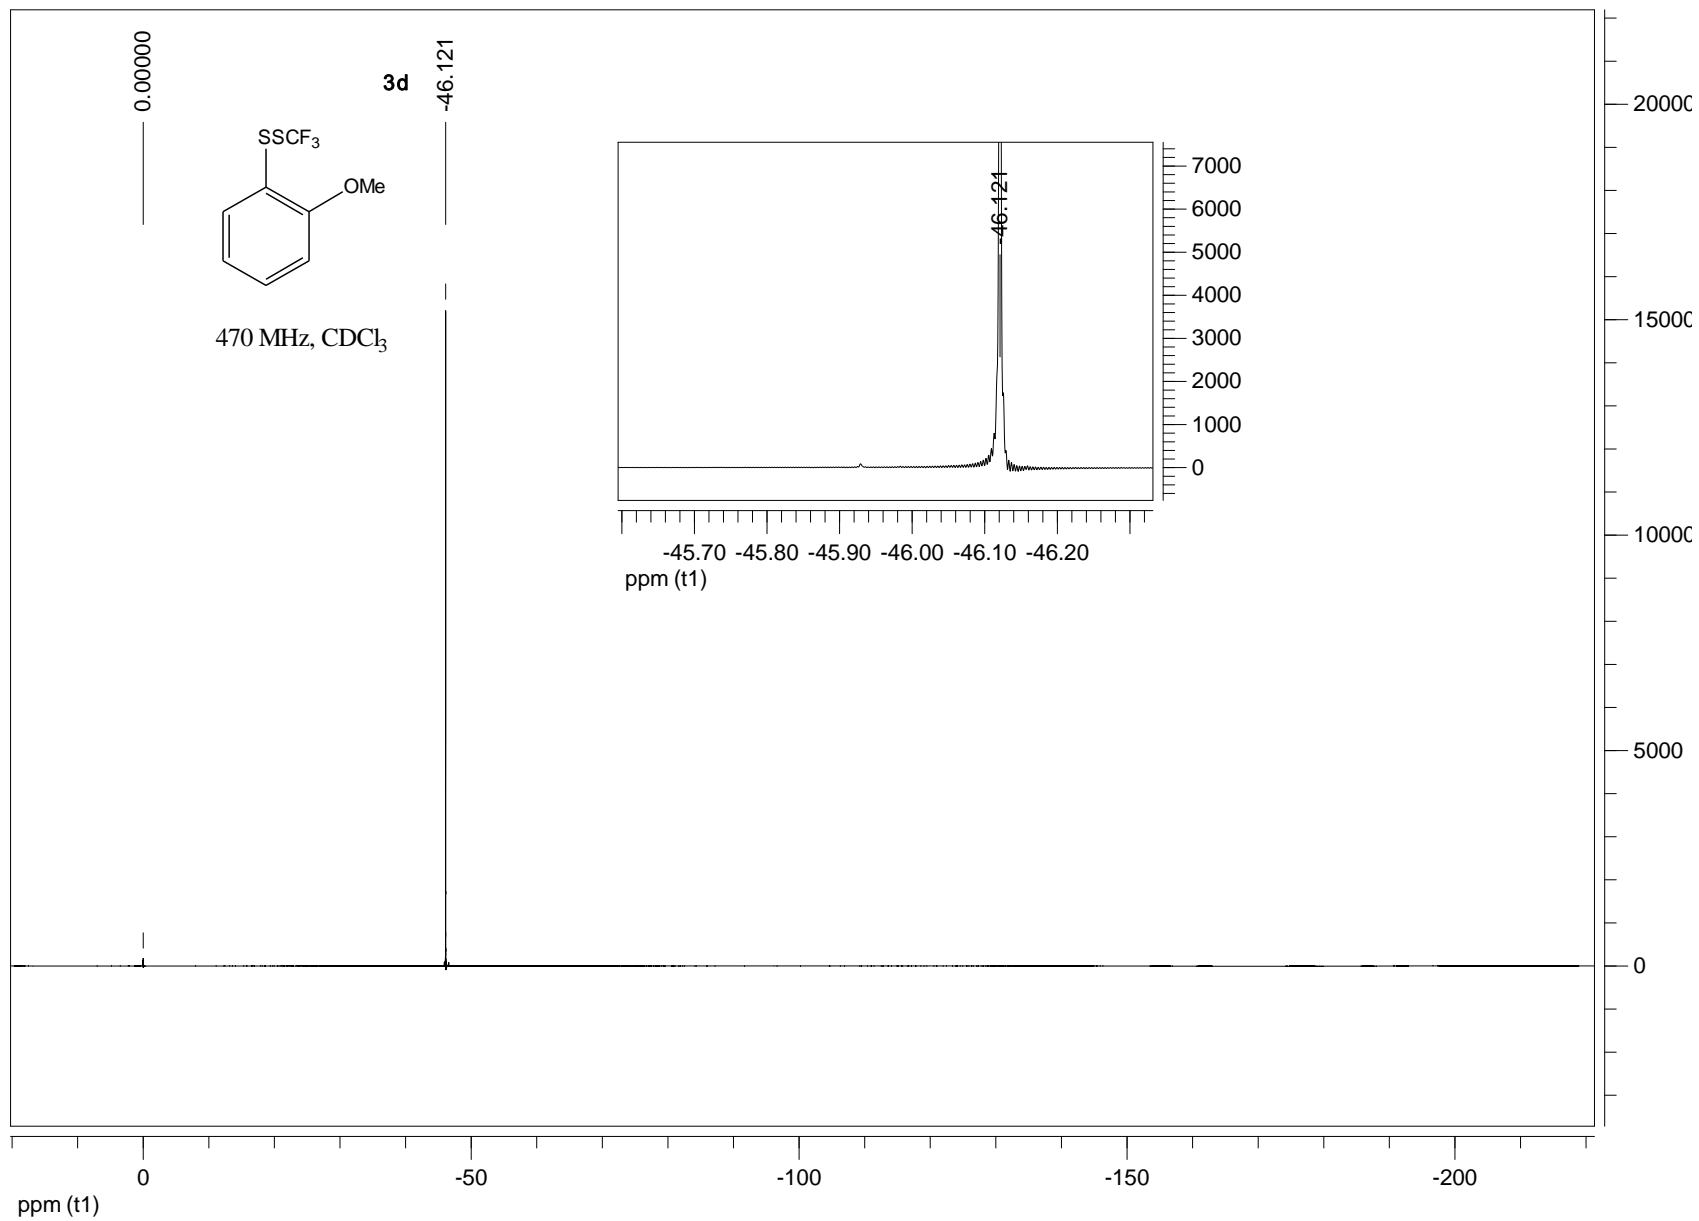

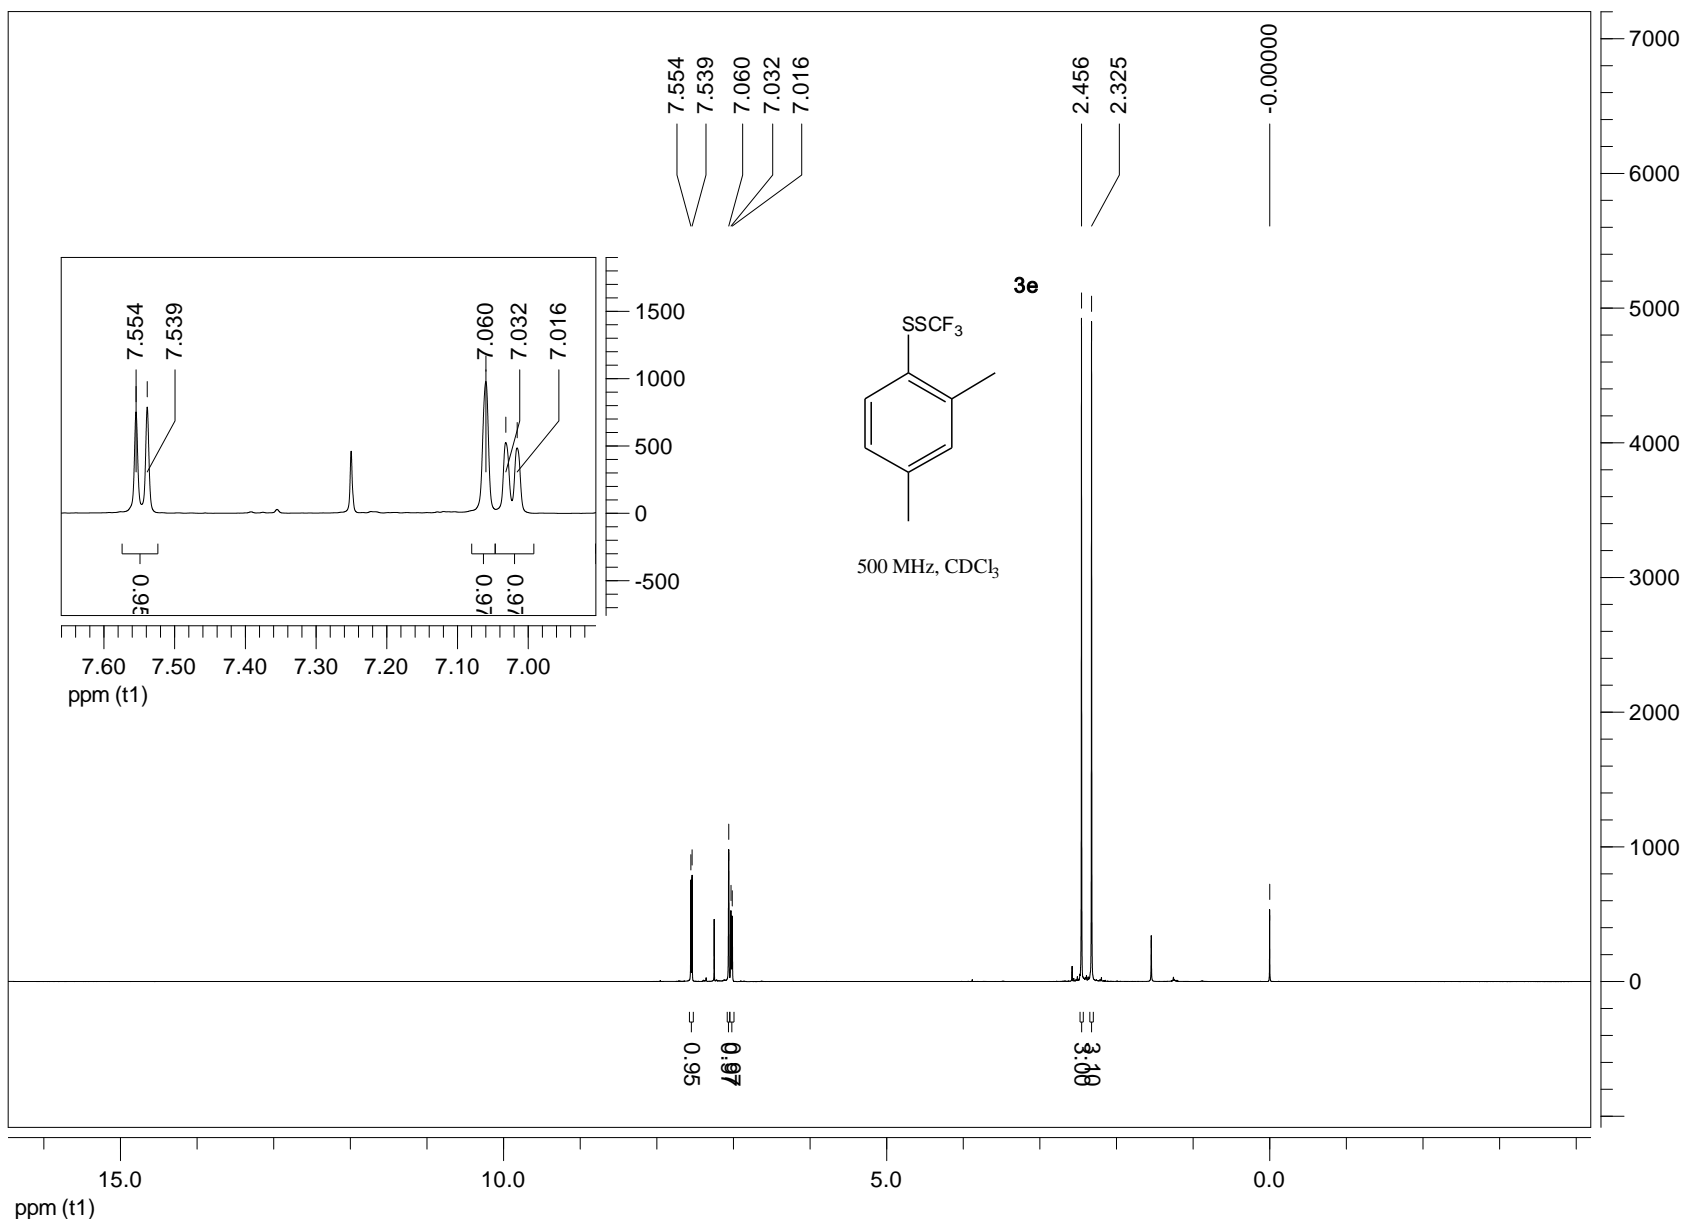

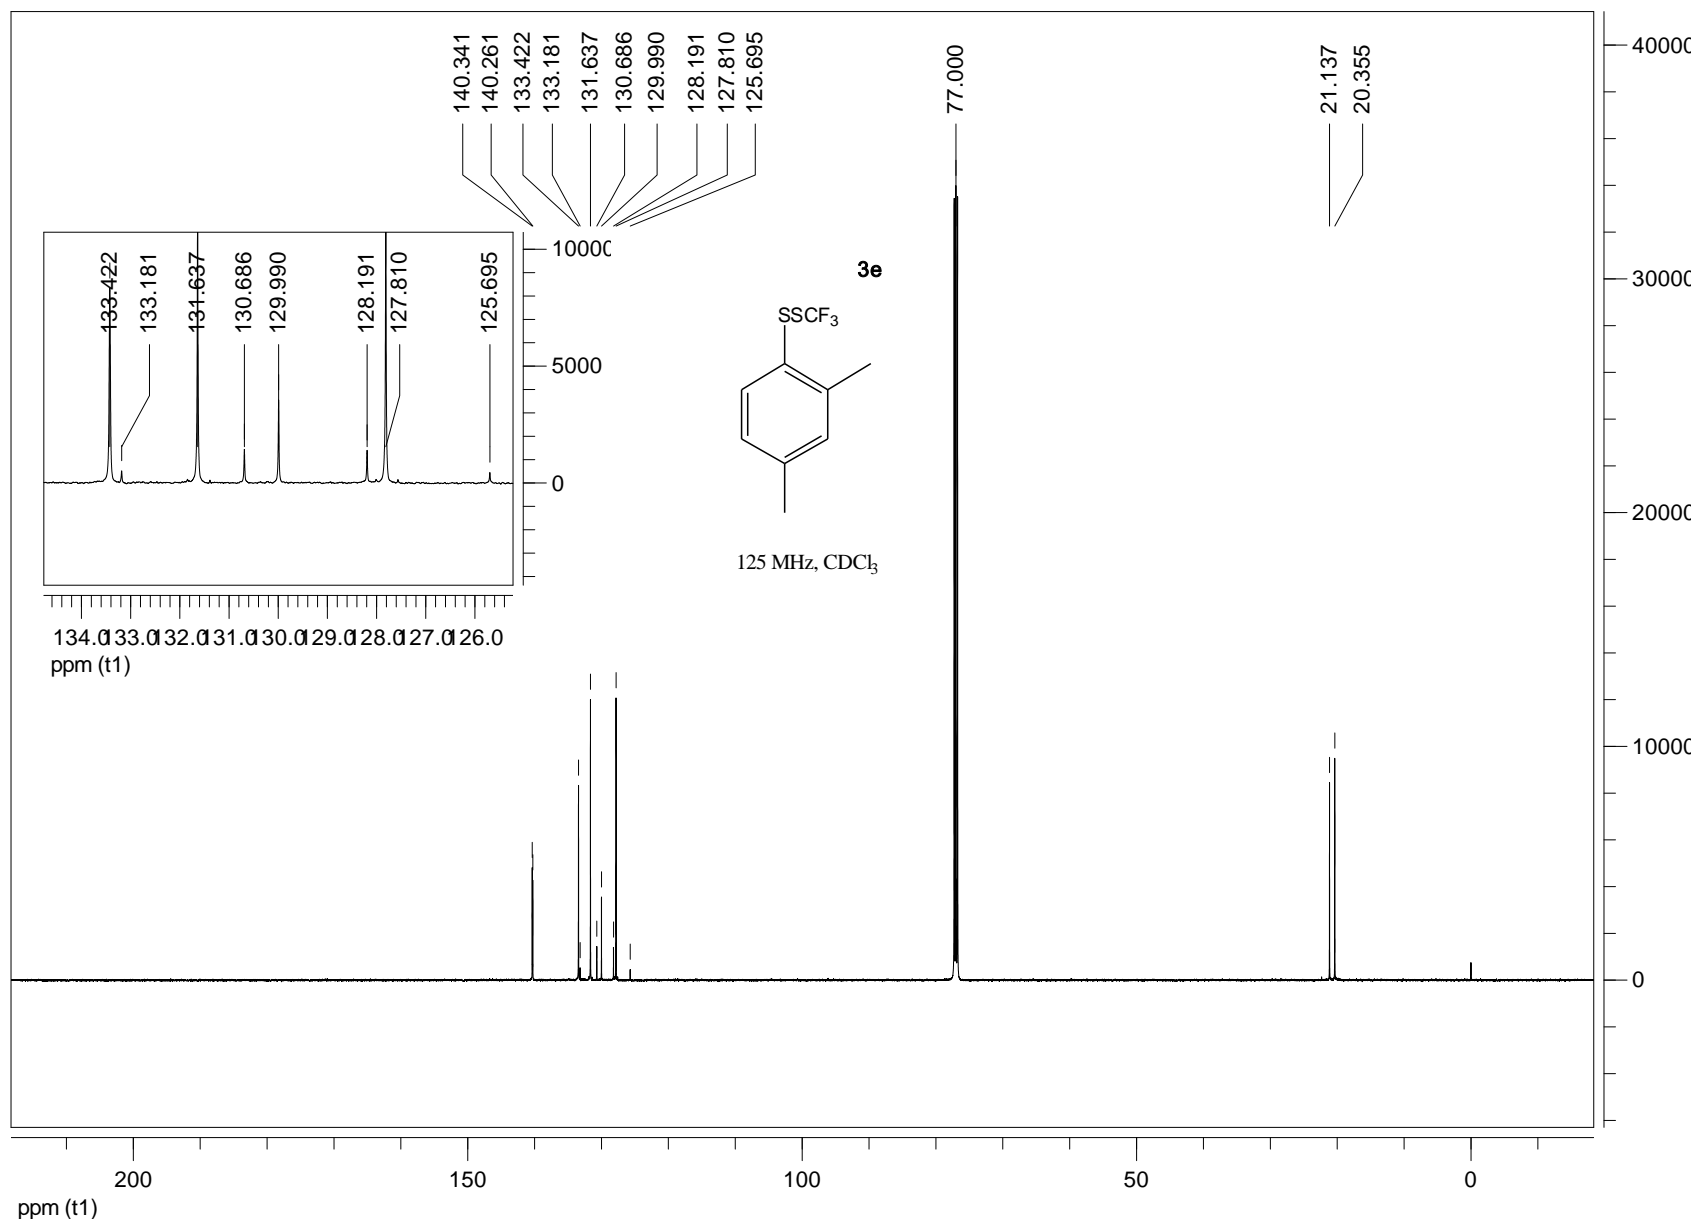

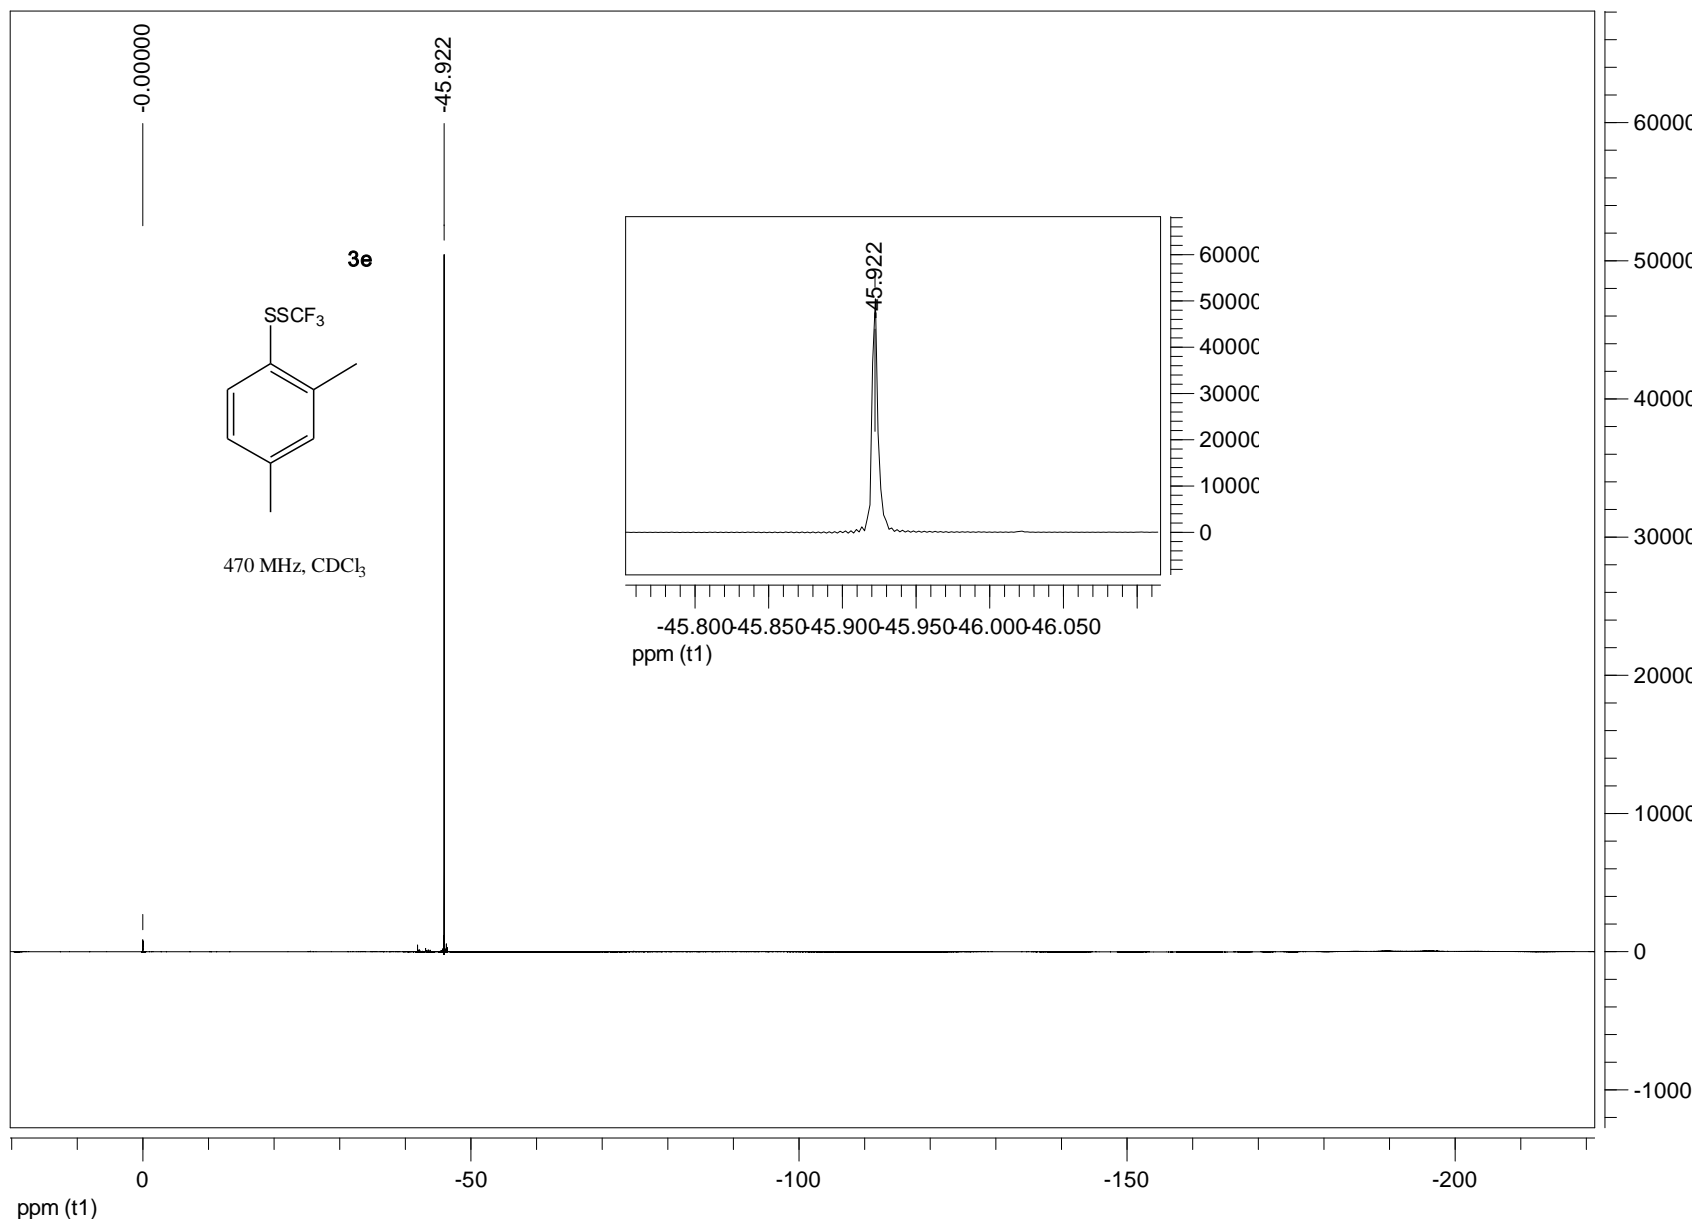



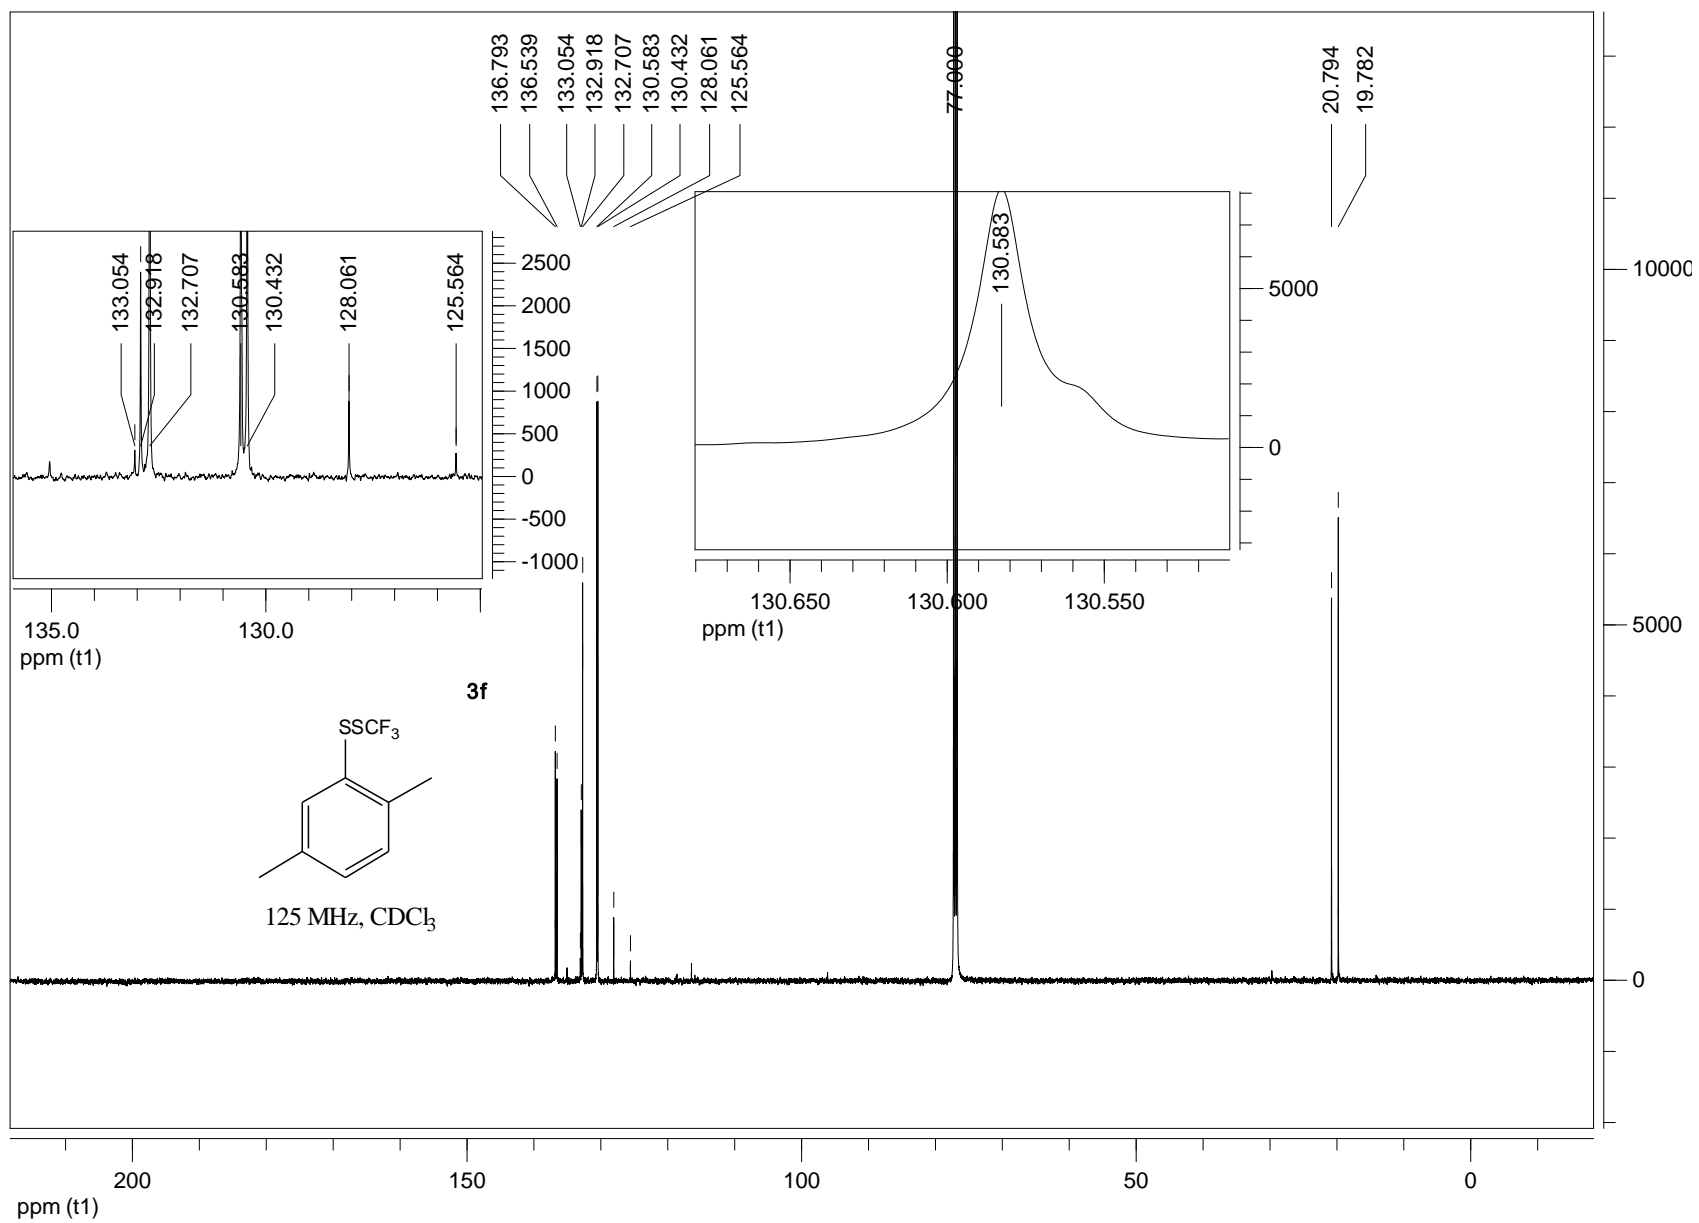



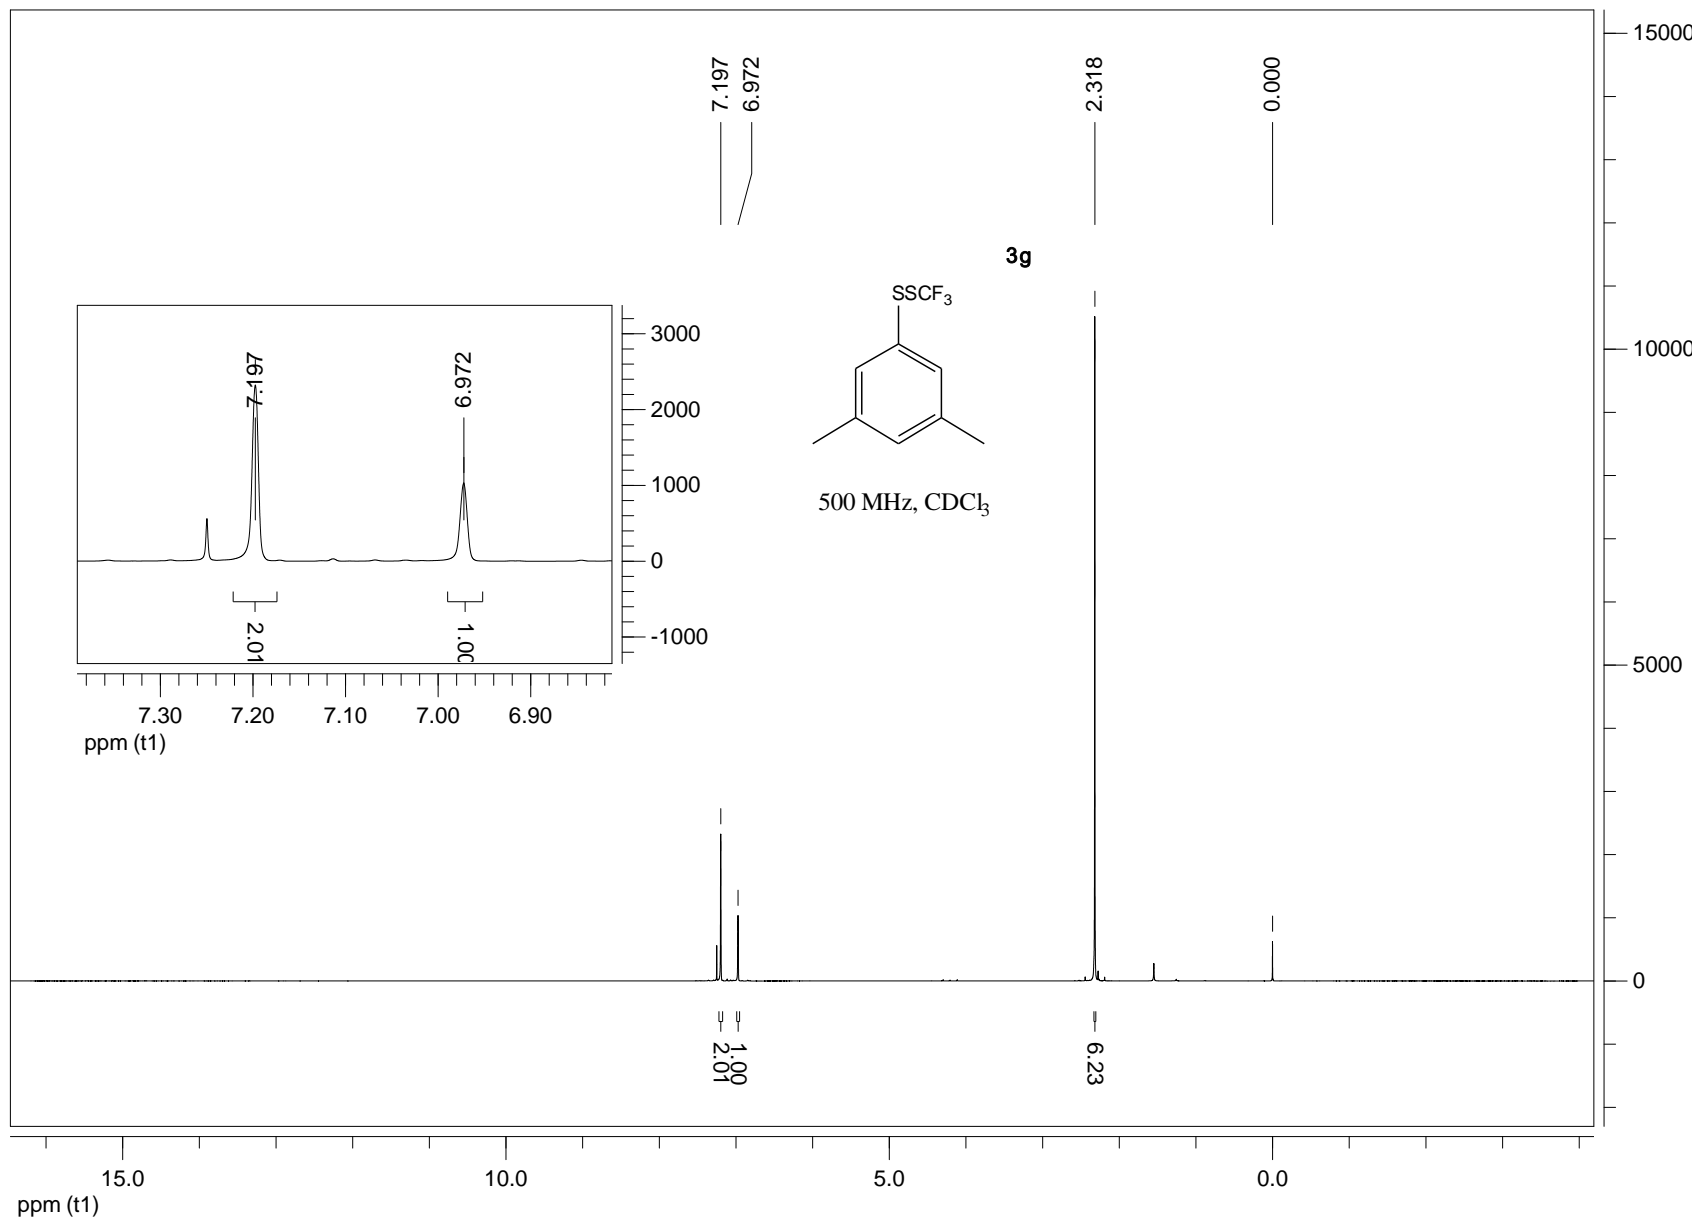



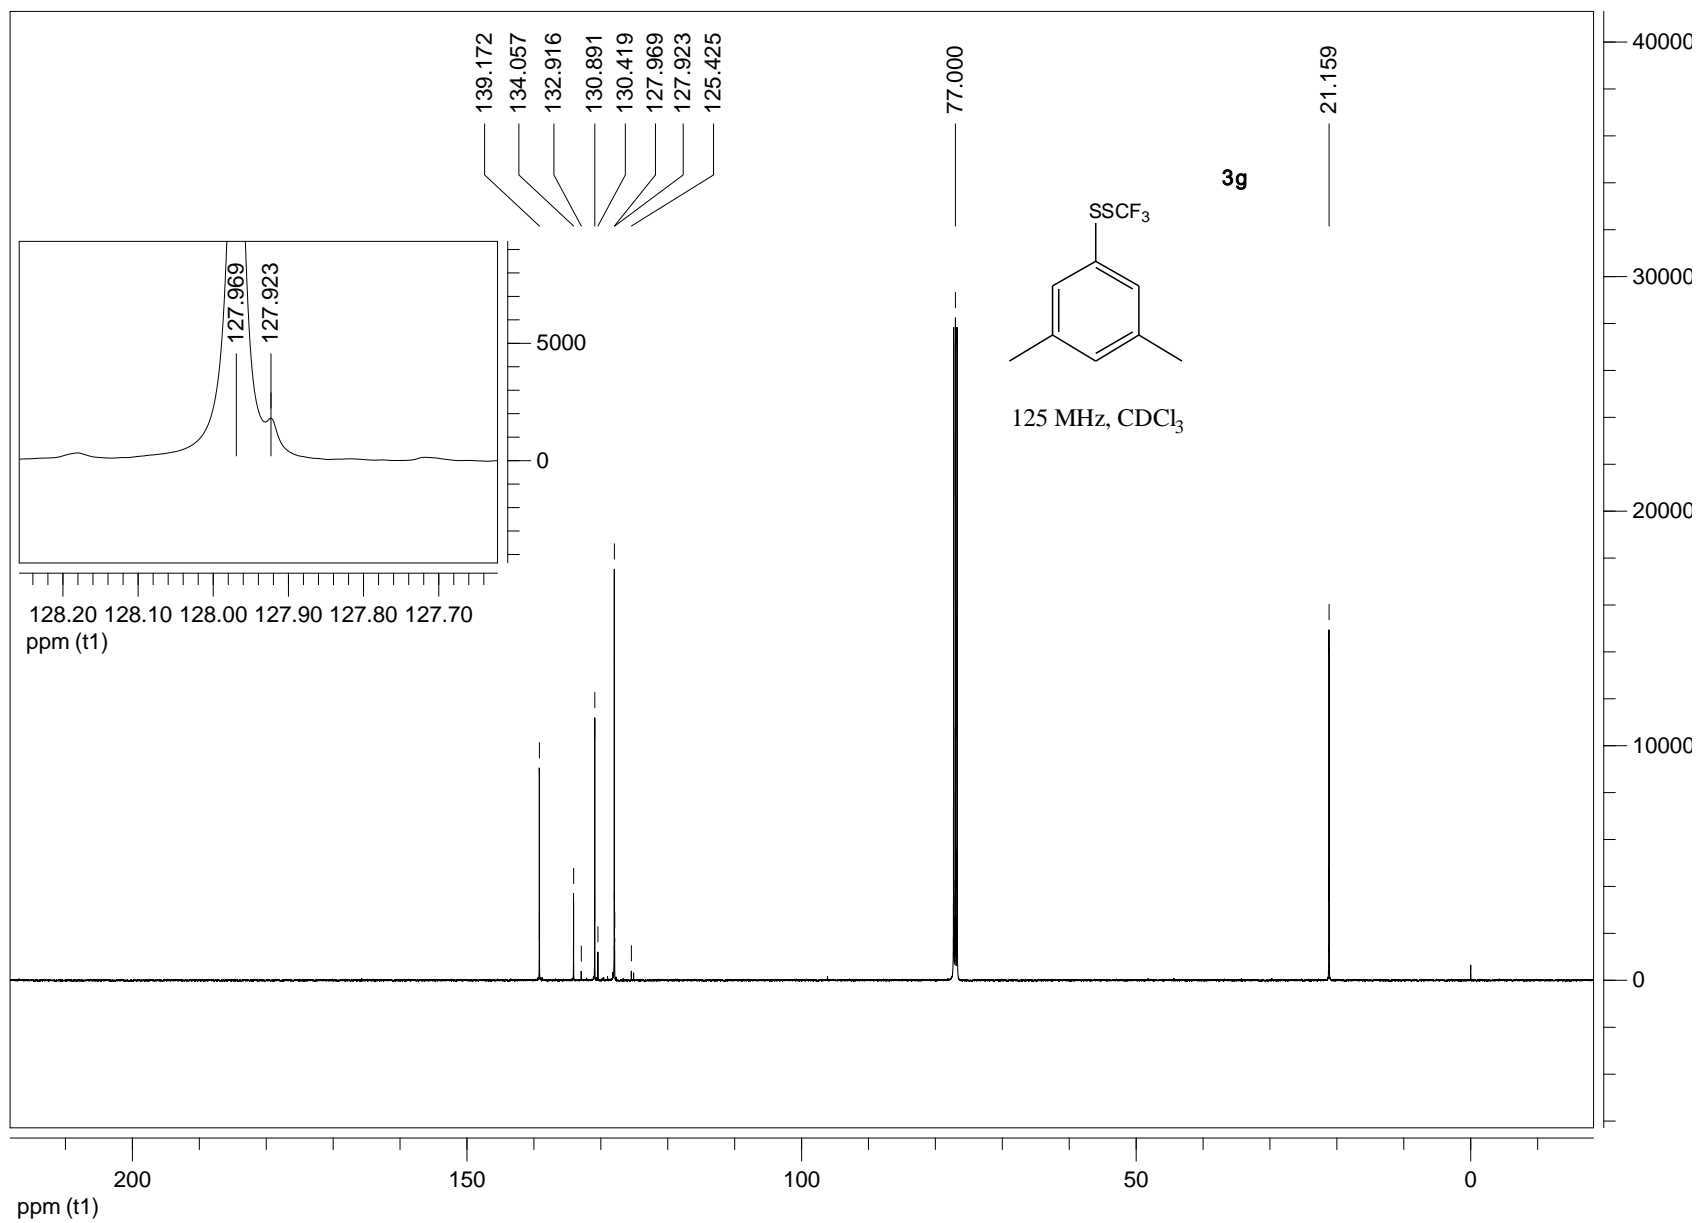

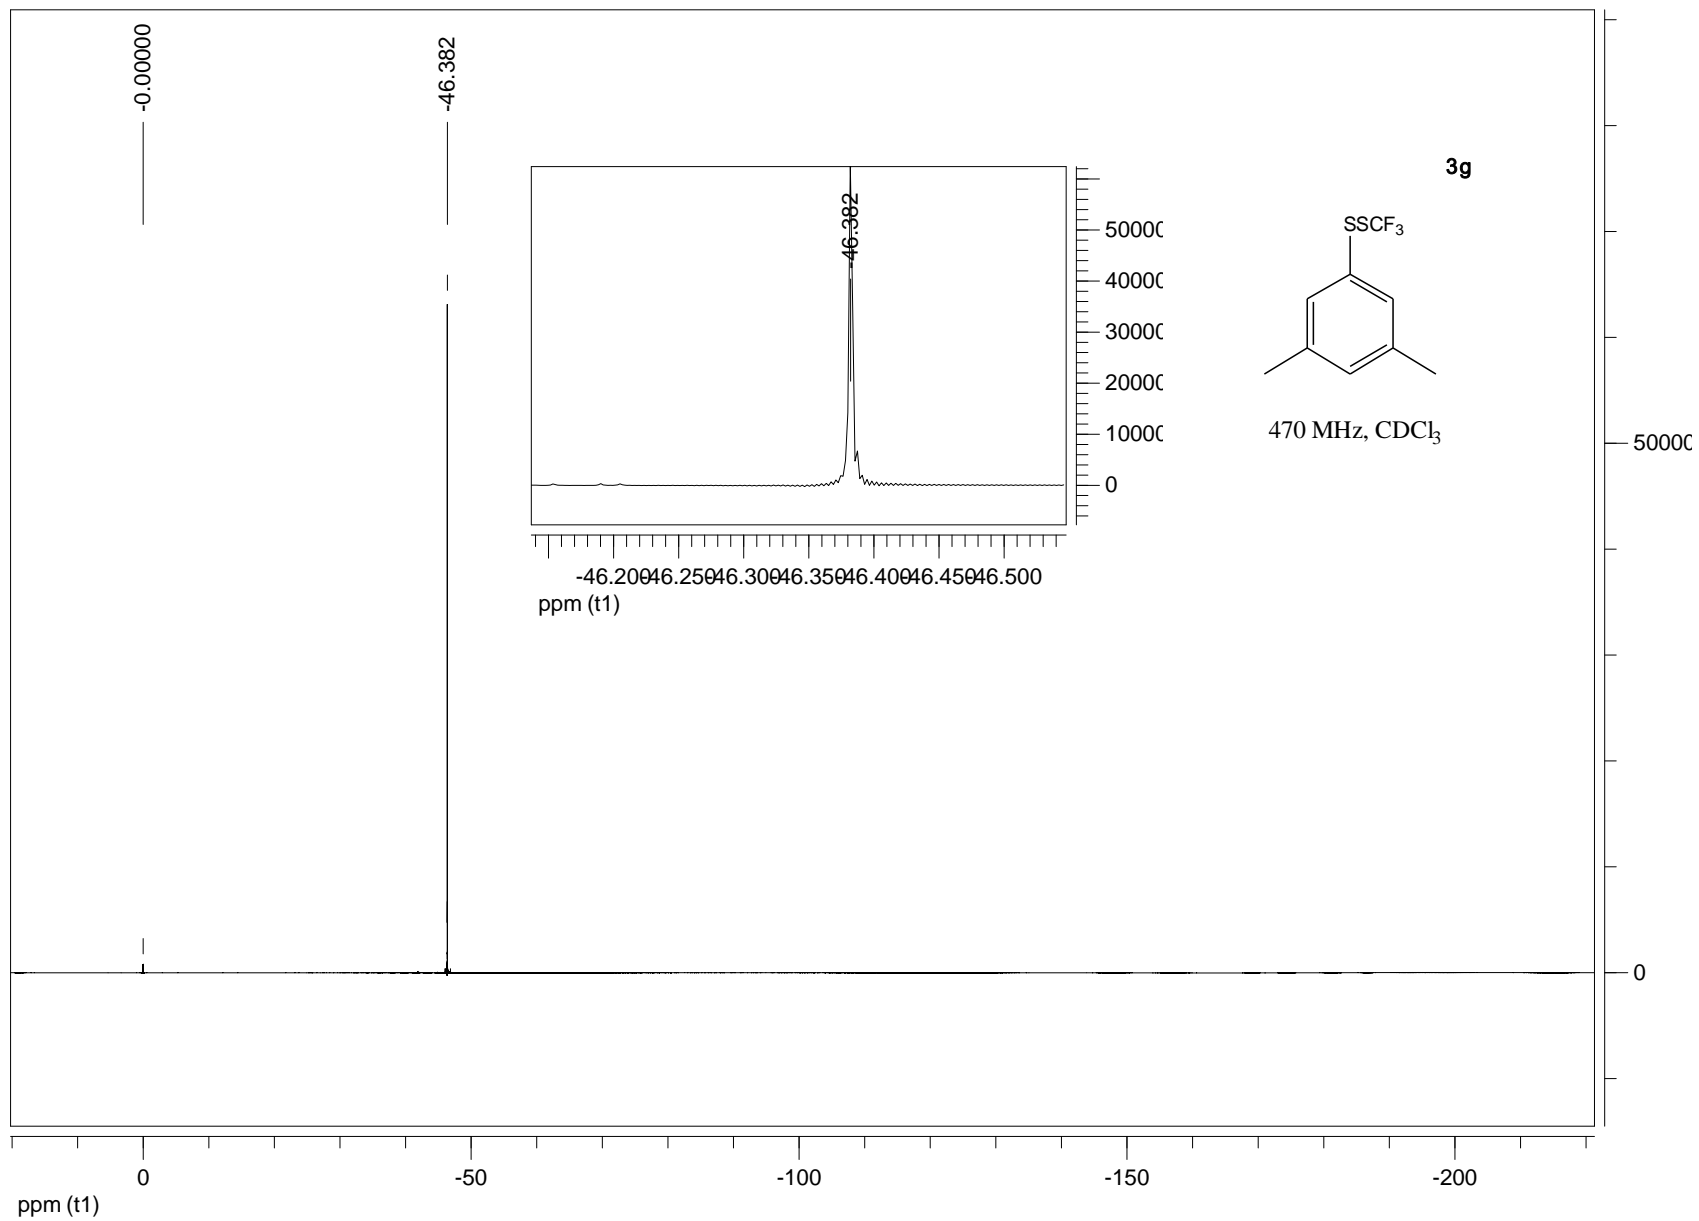

S22

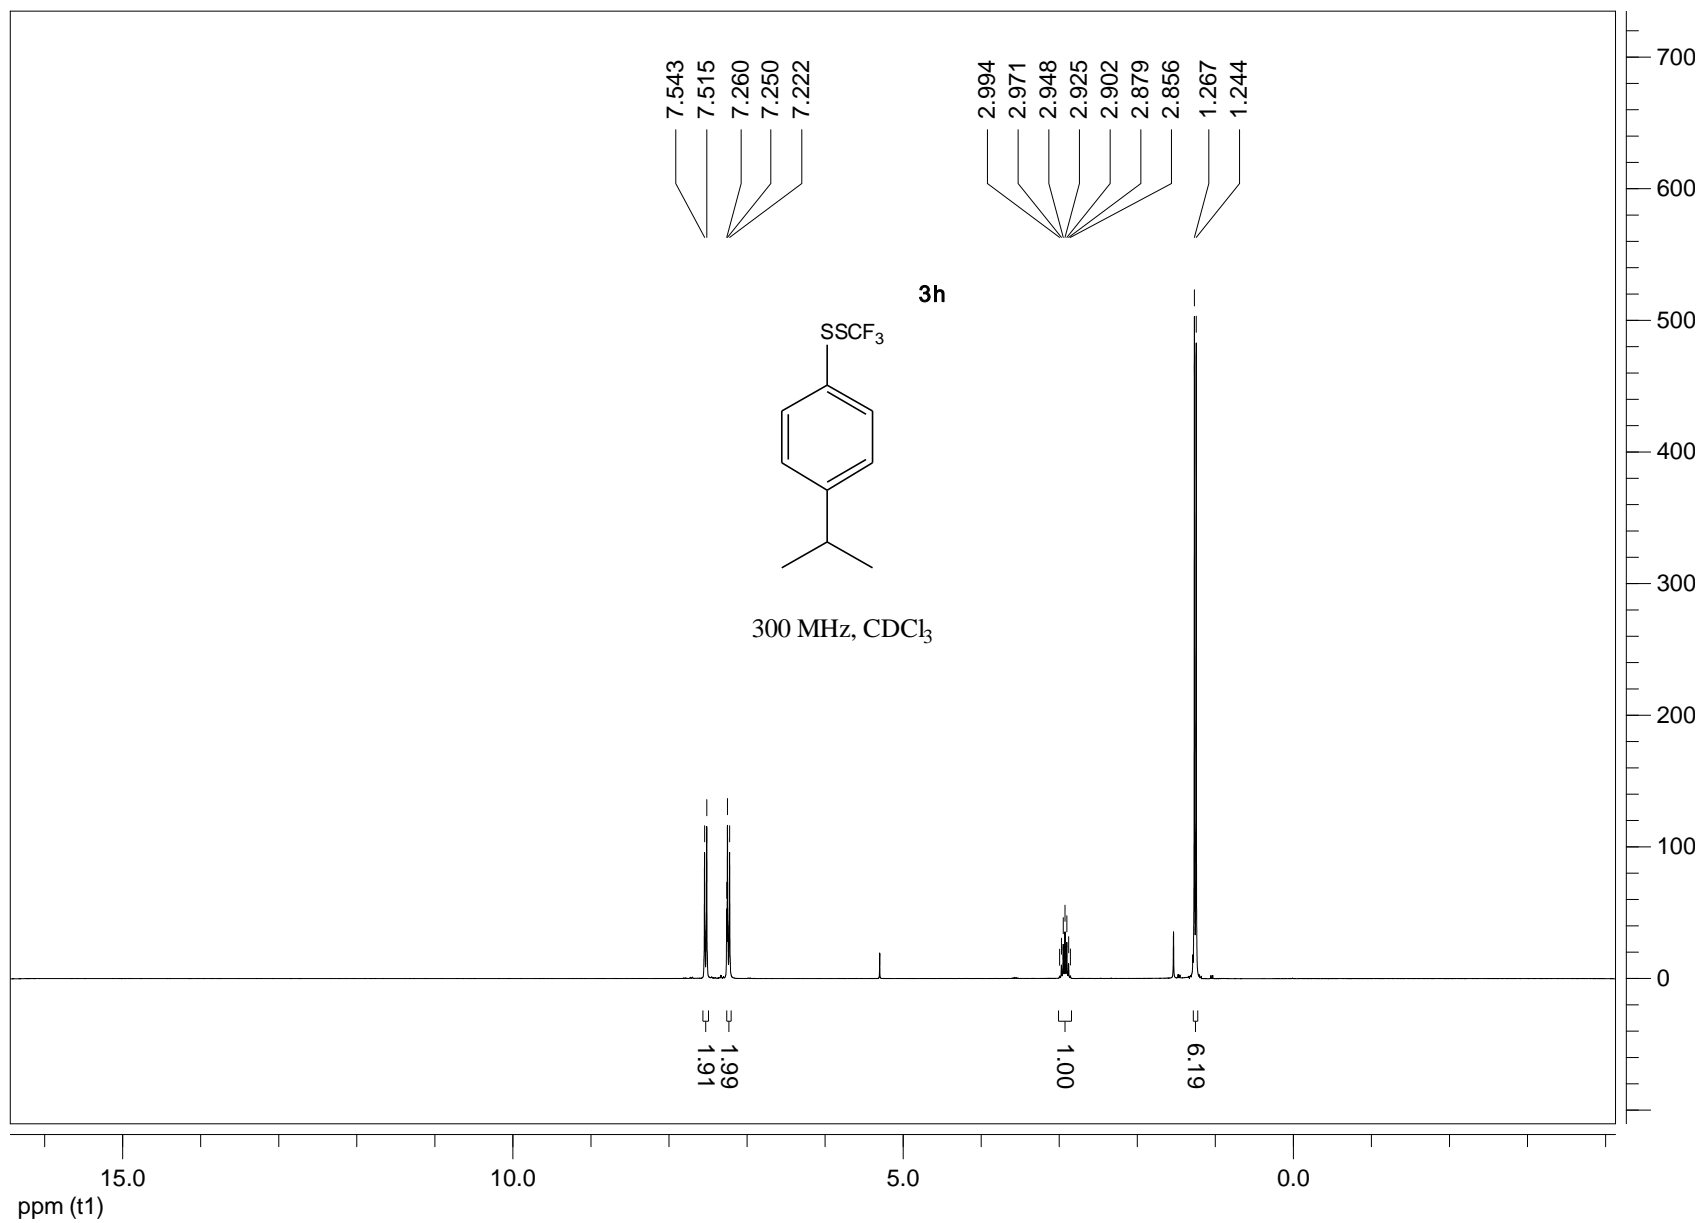

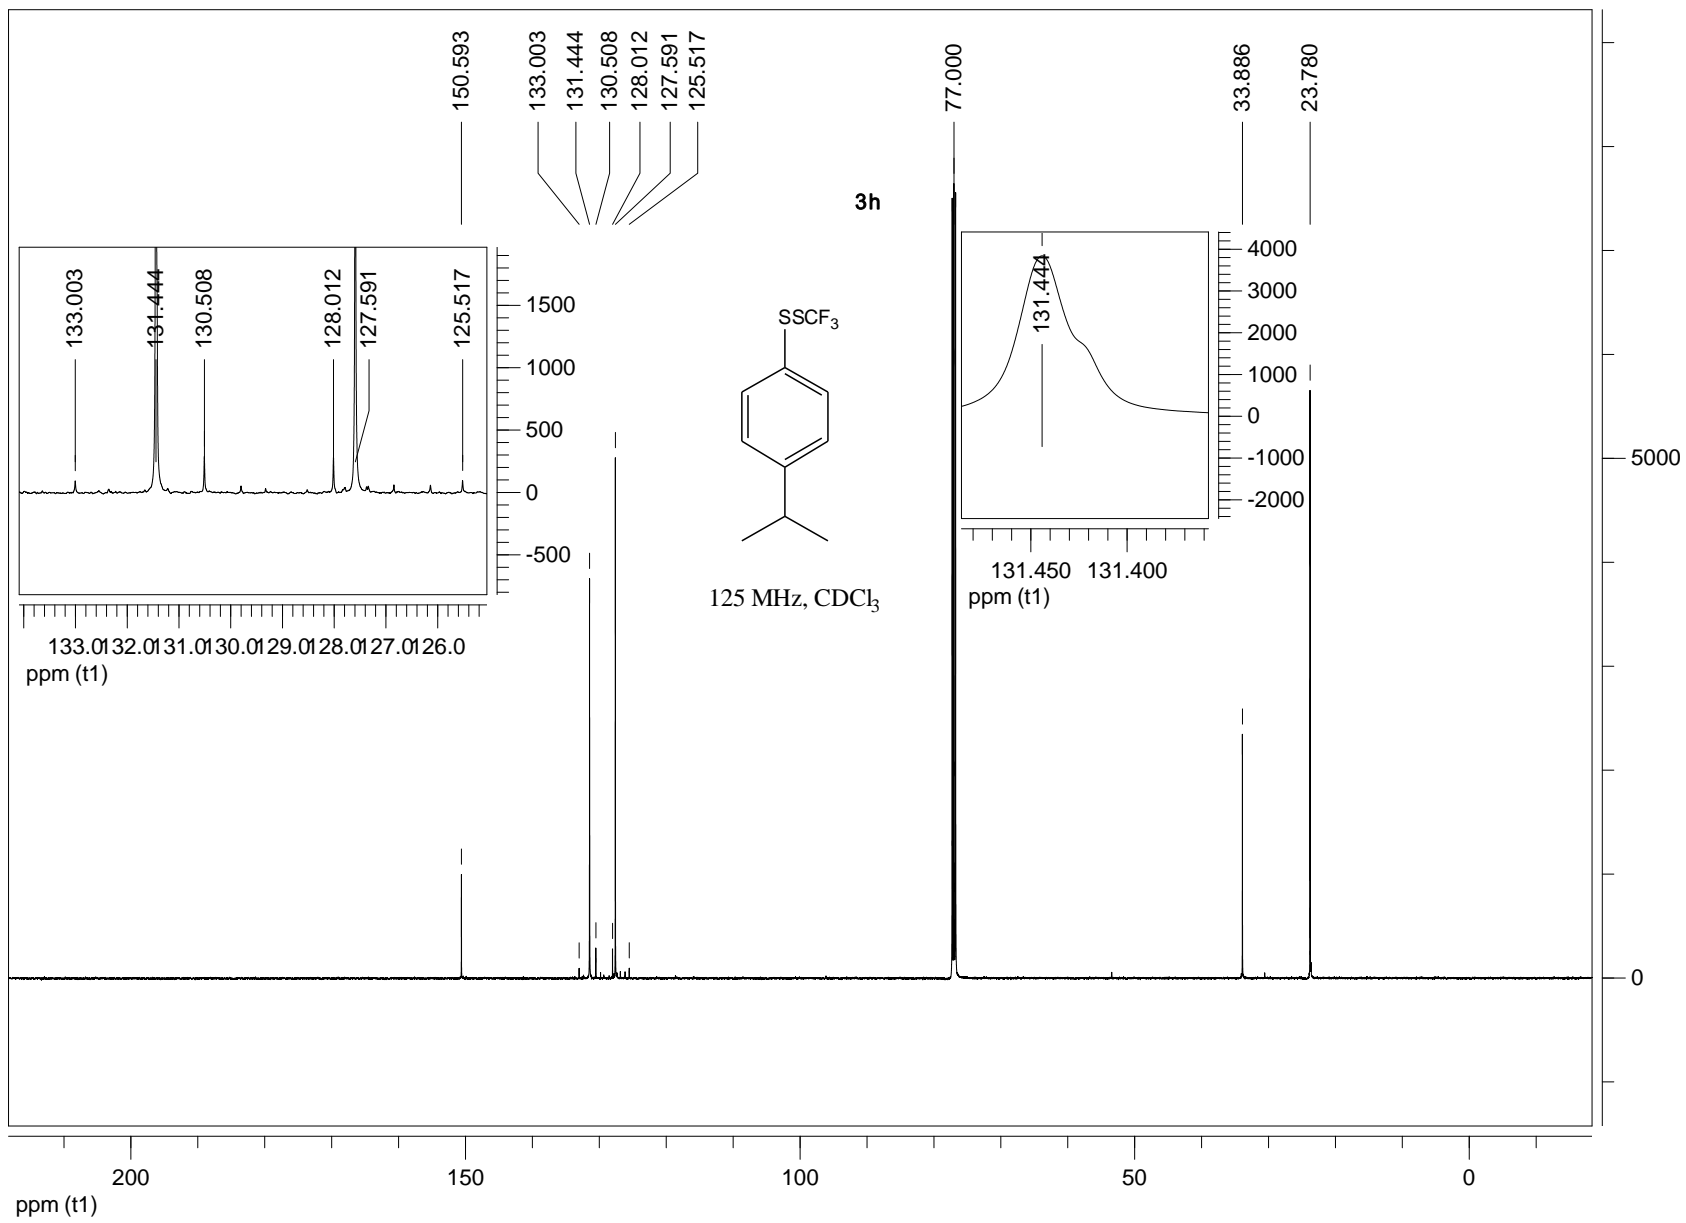

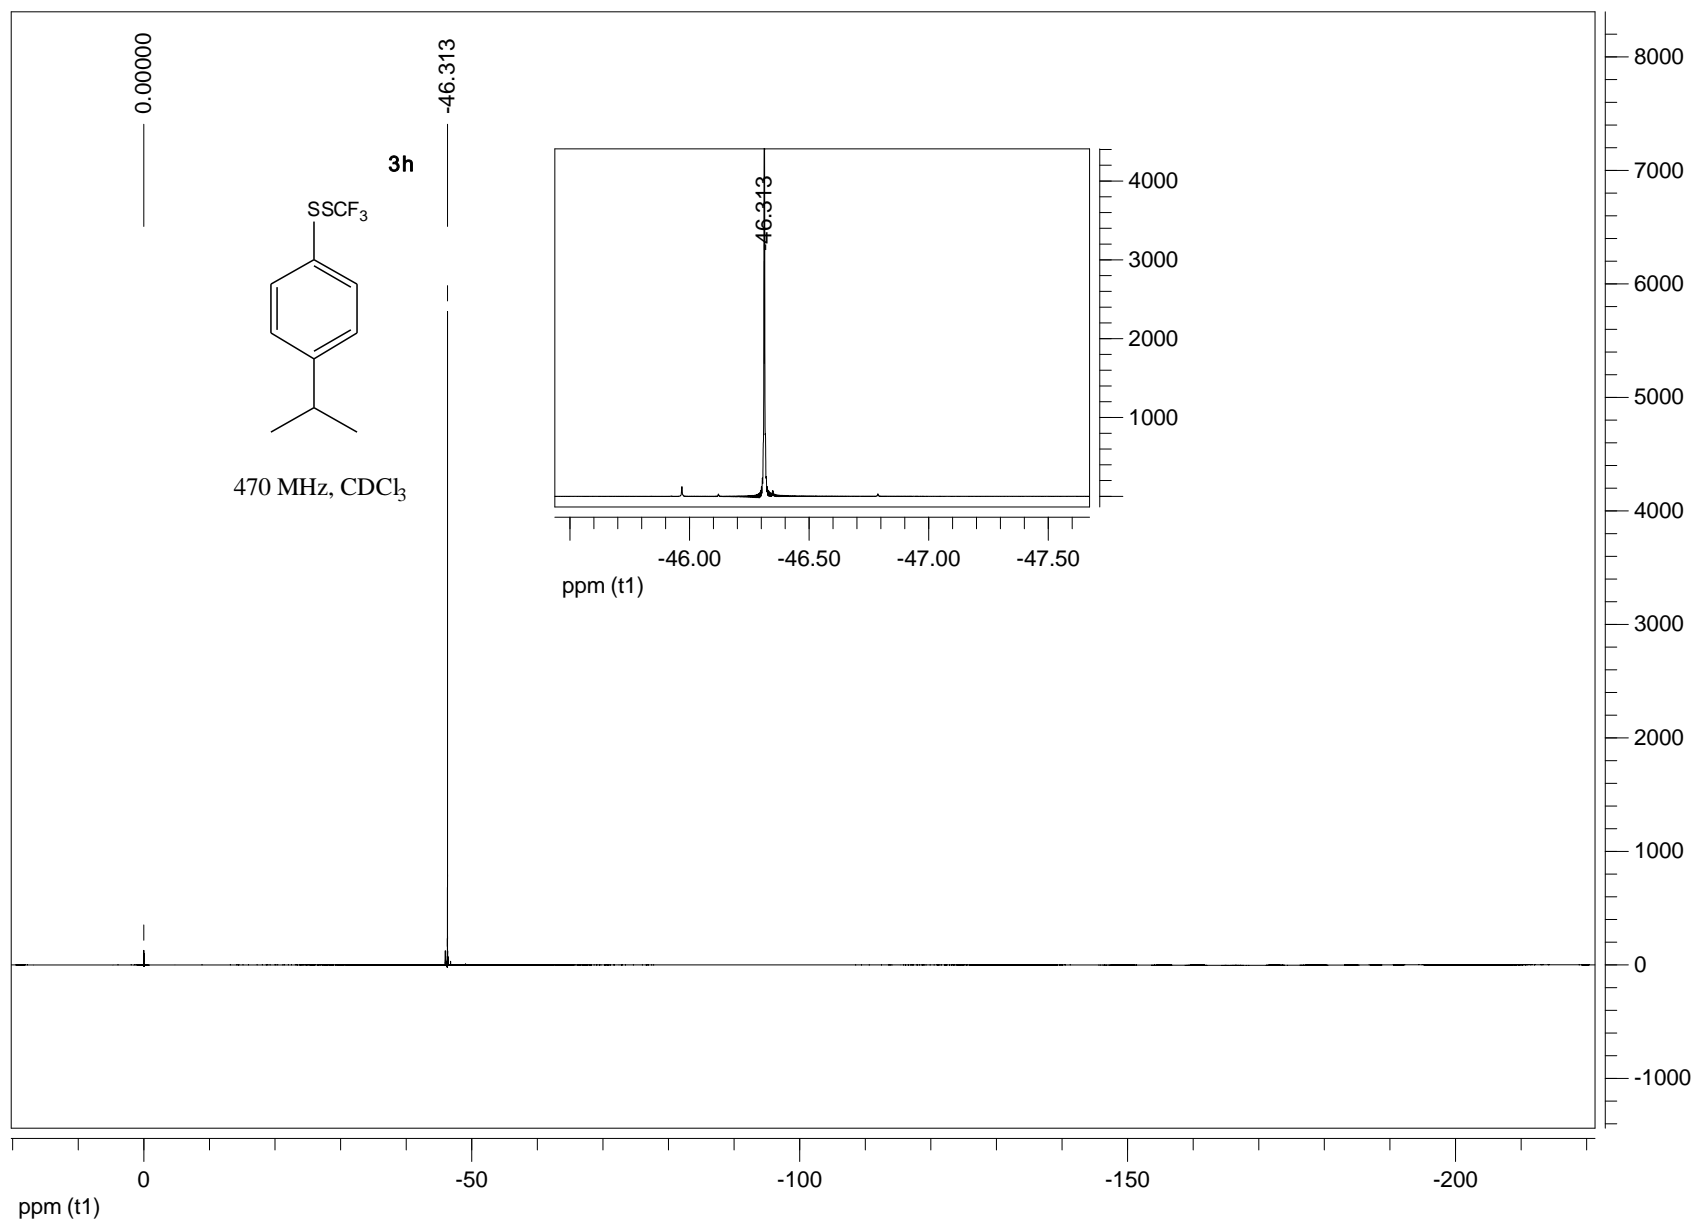

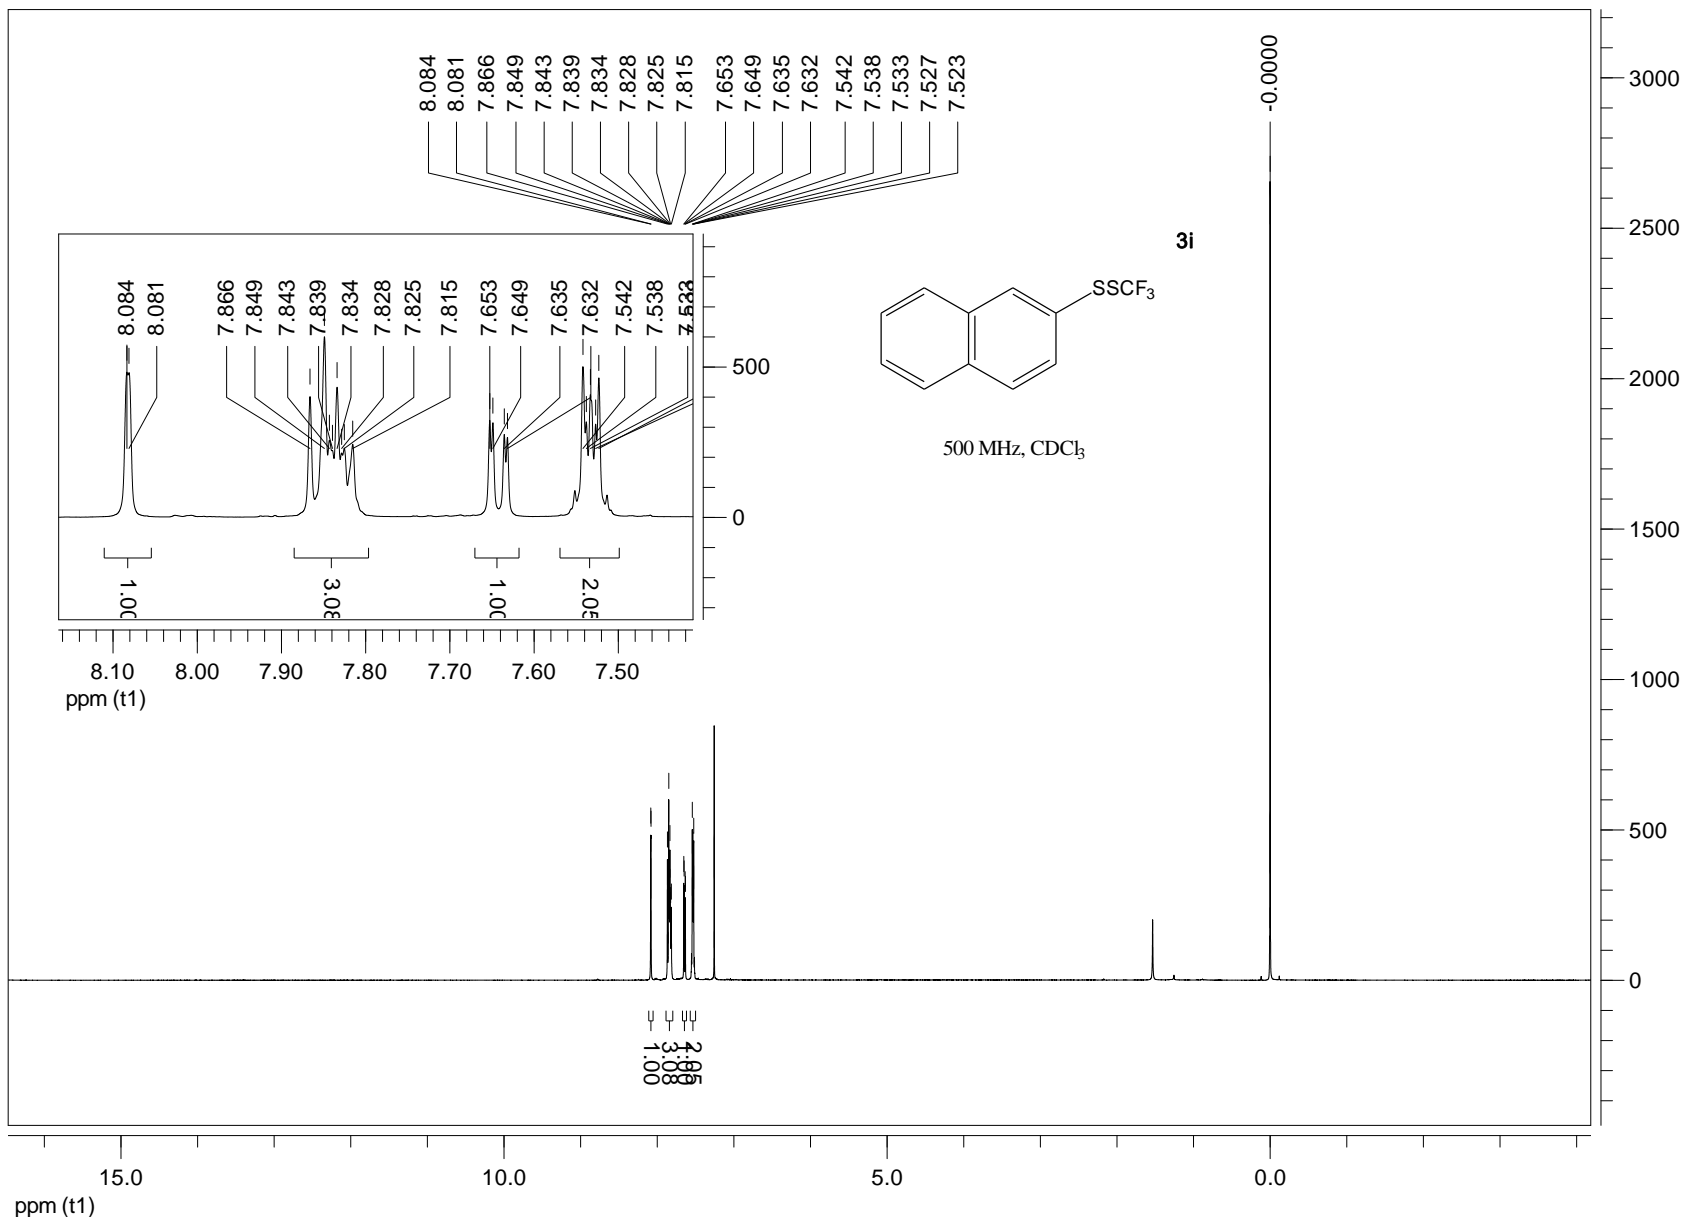

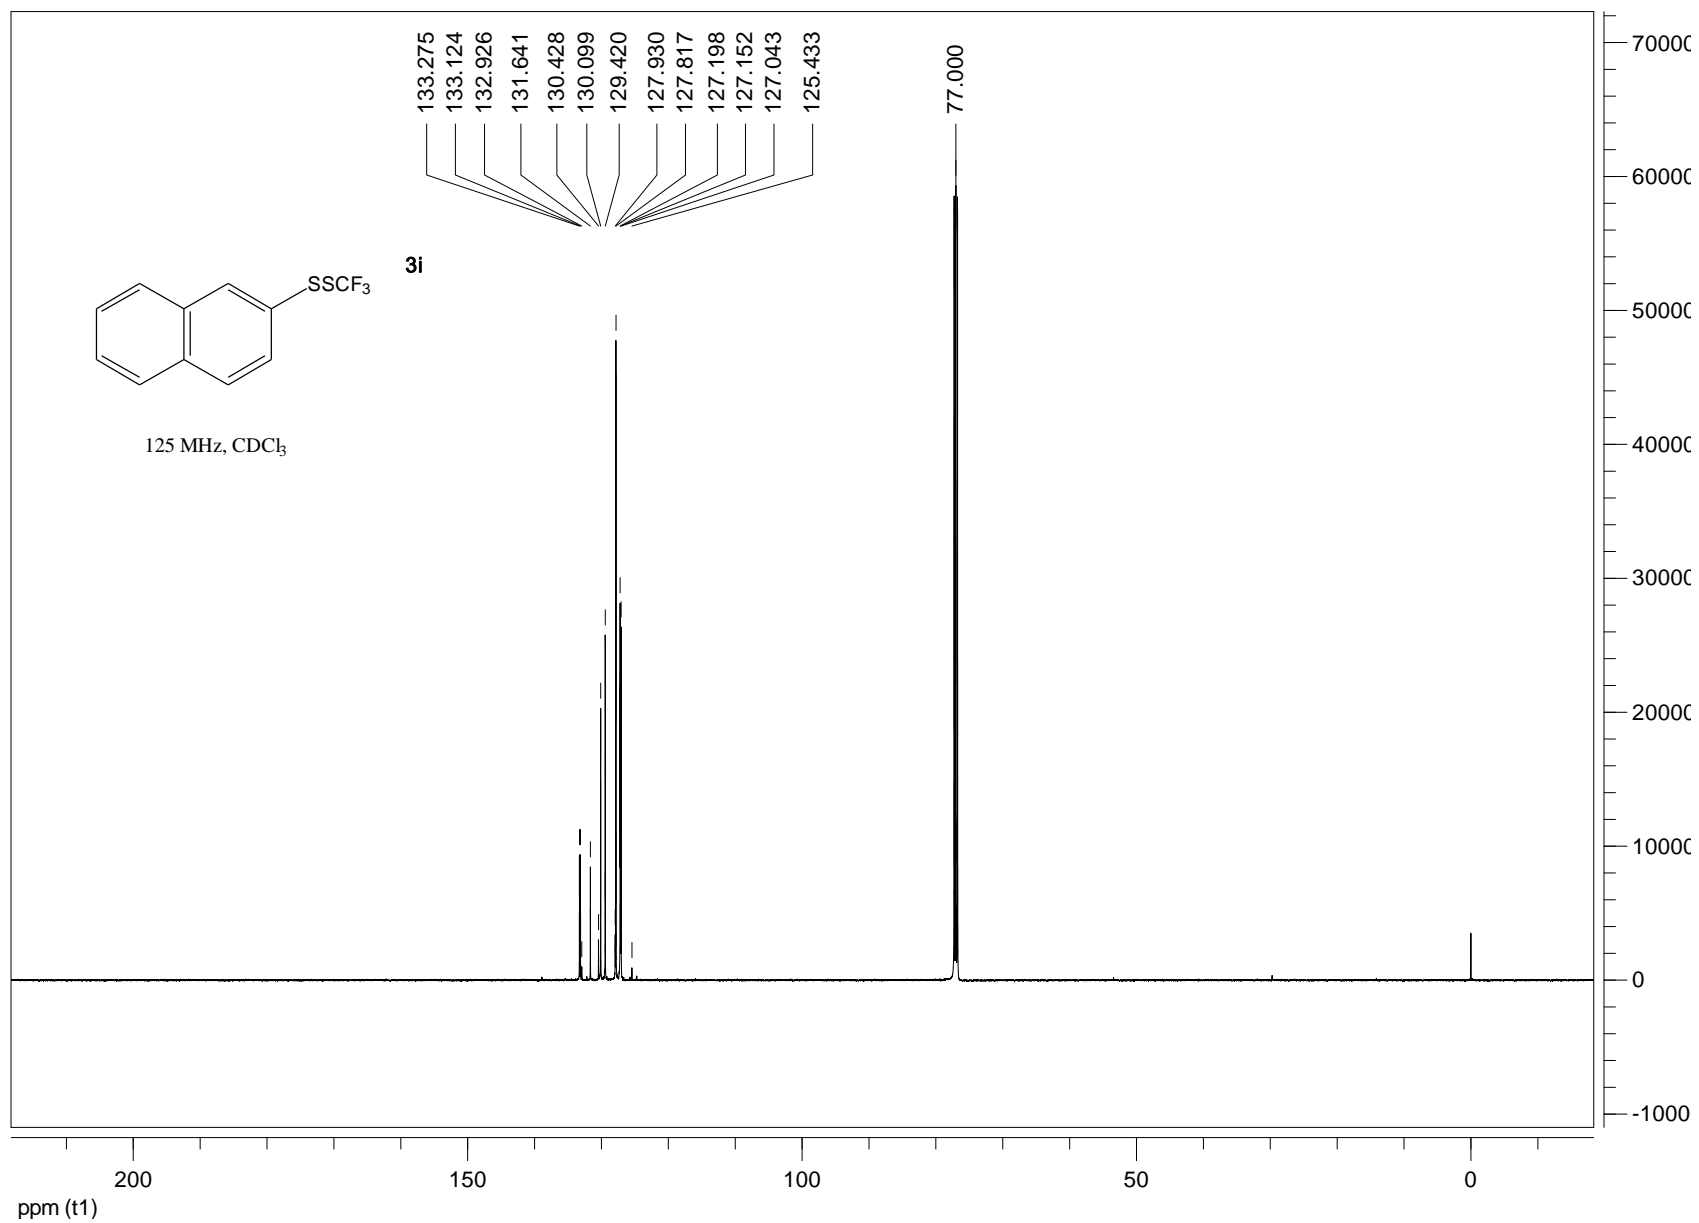

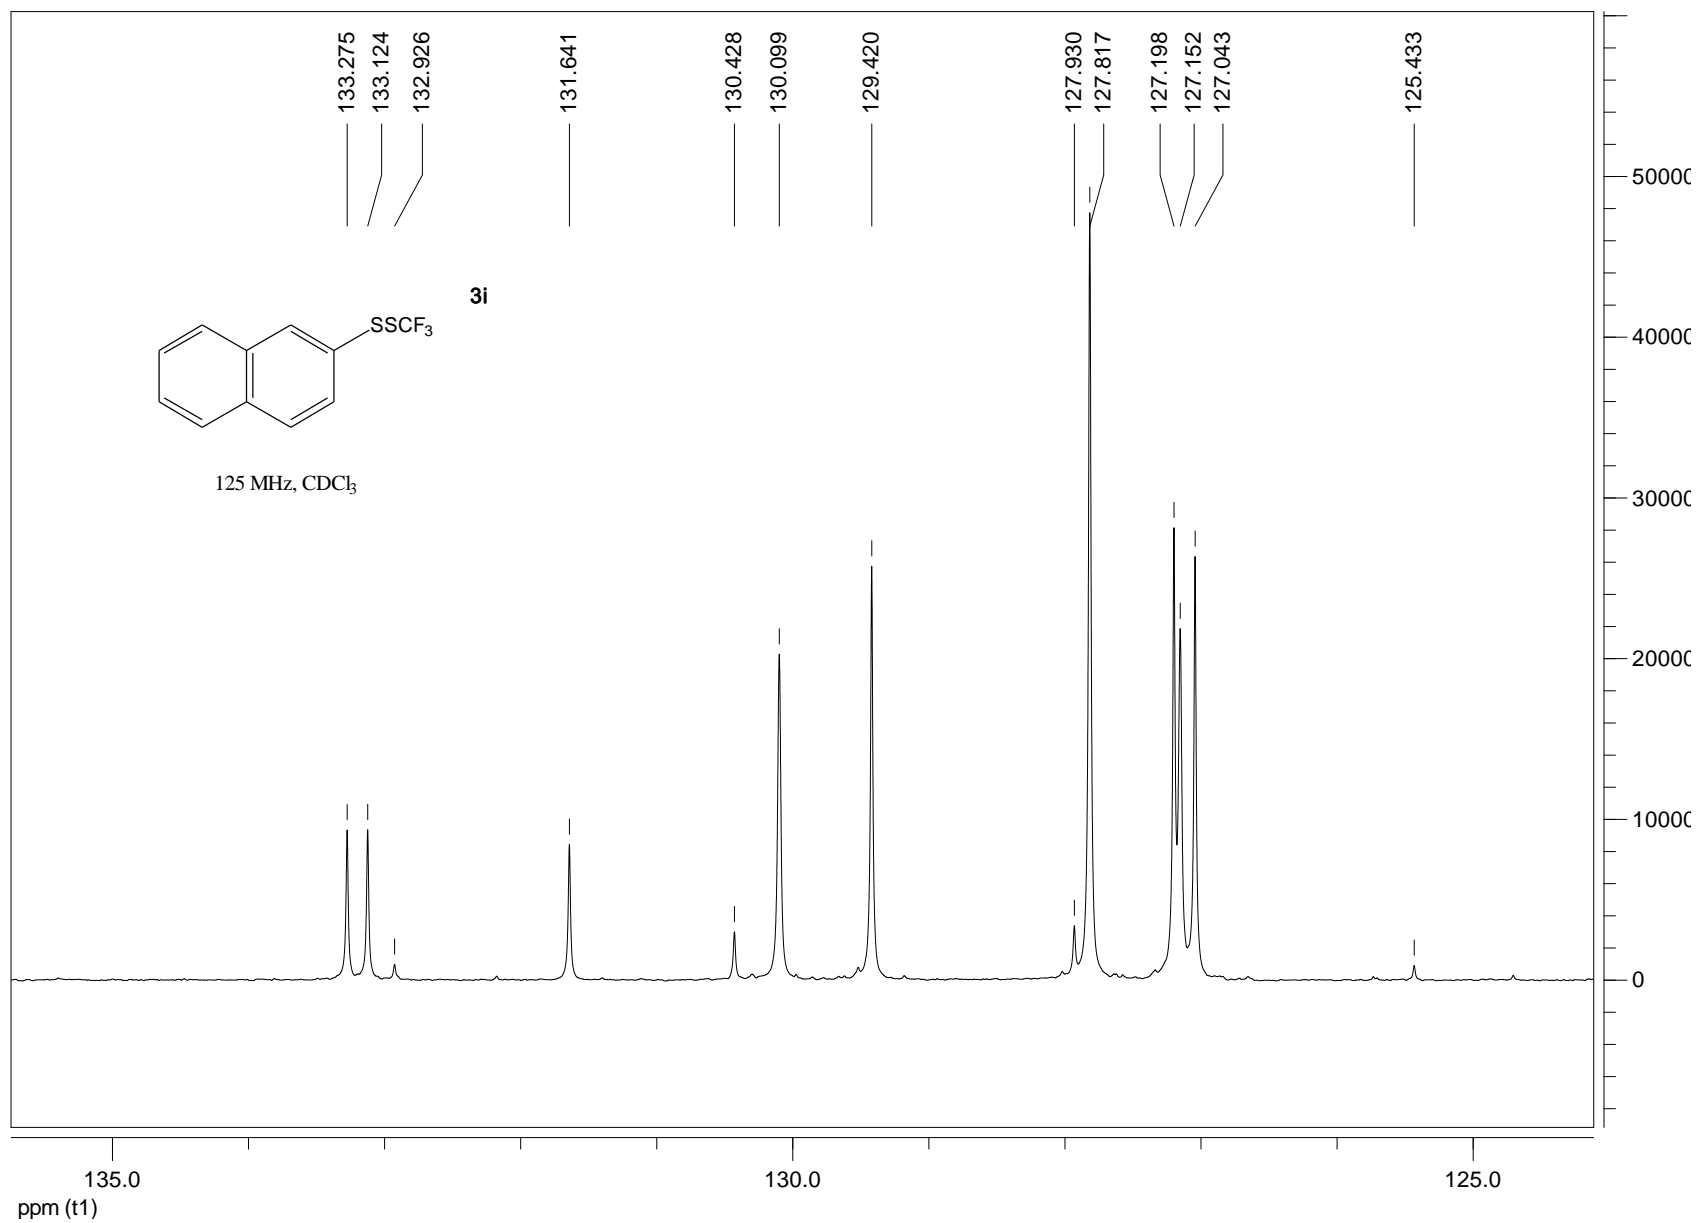



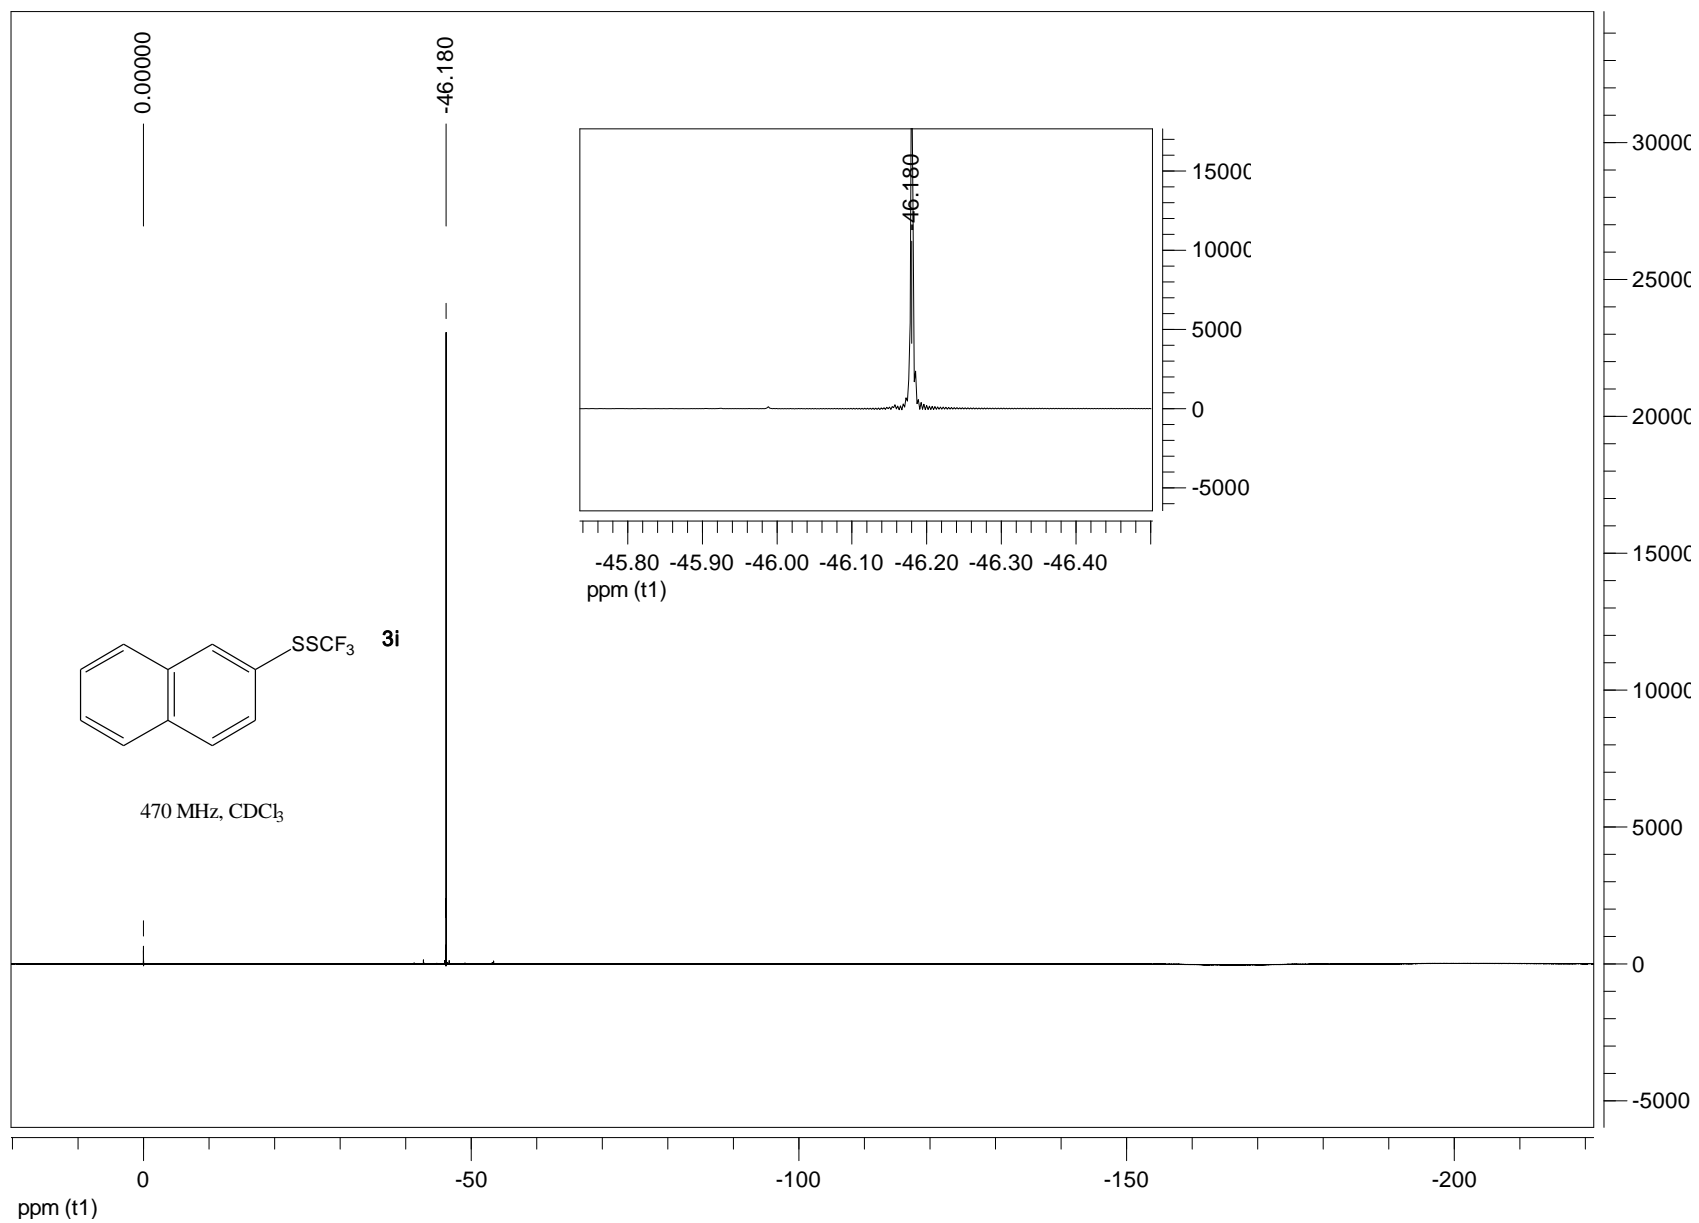

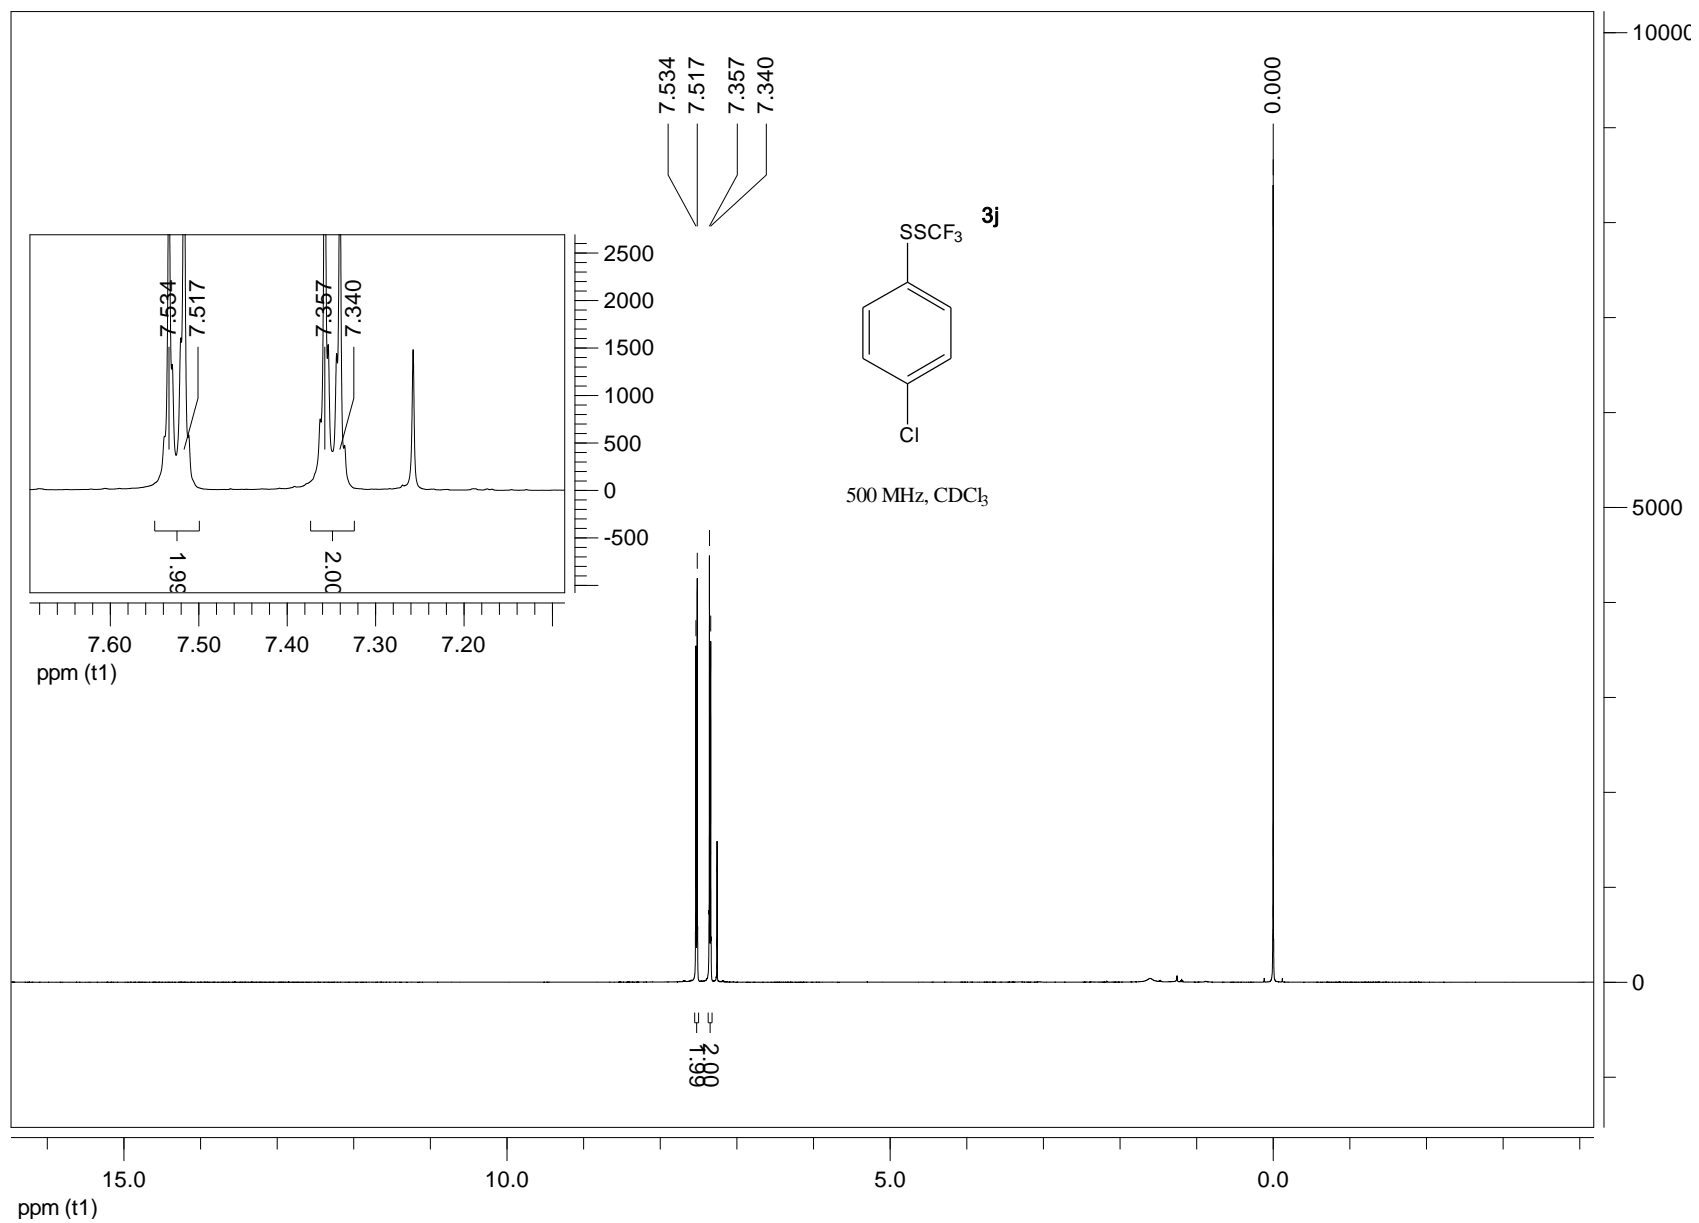

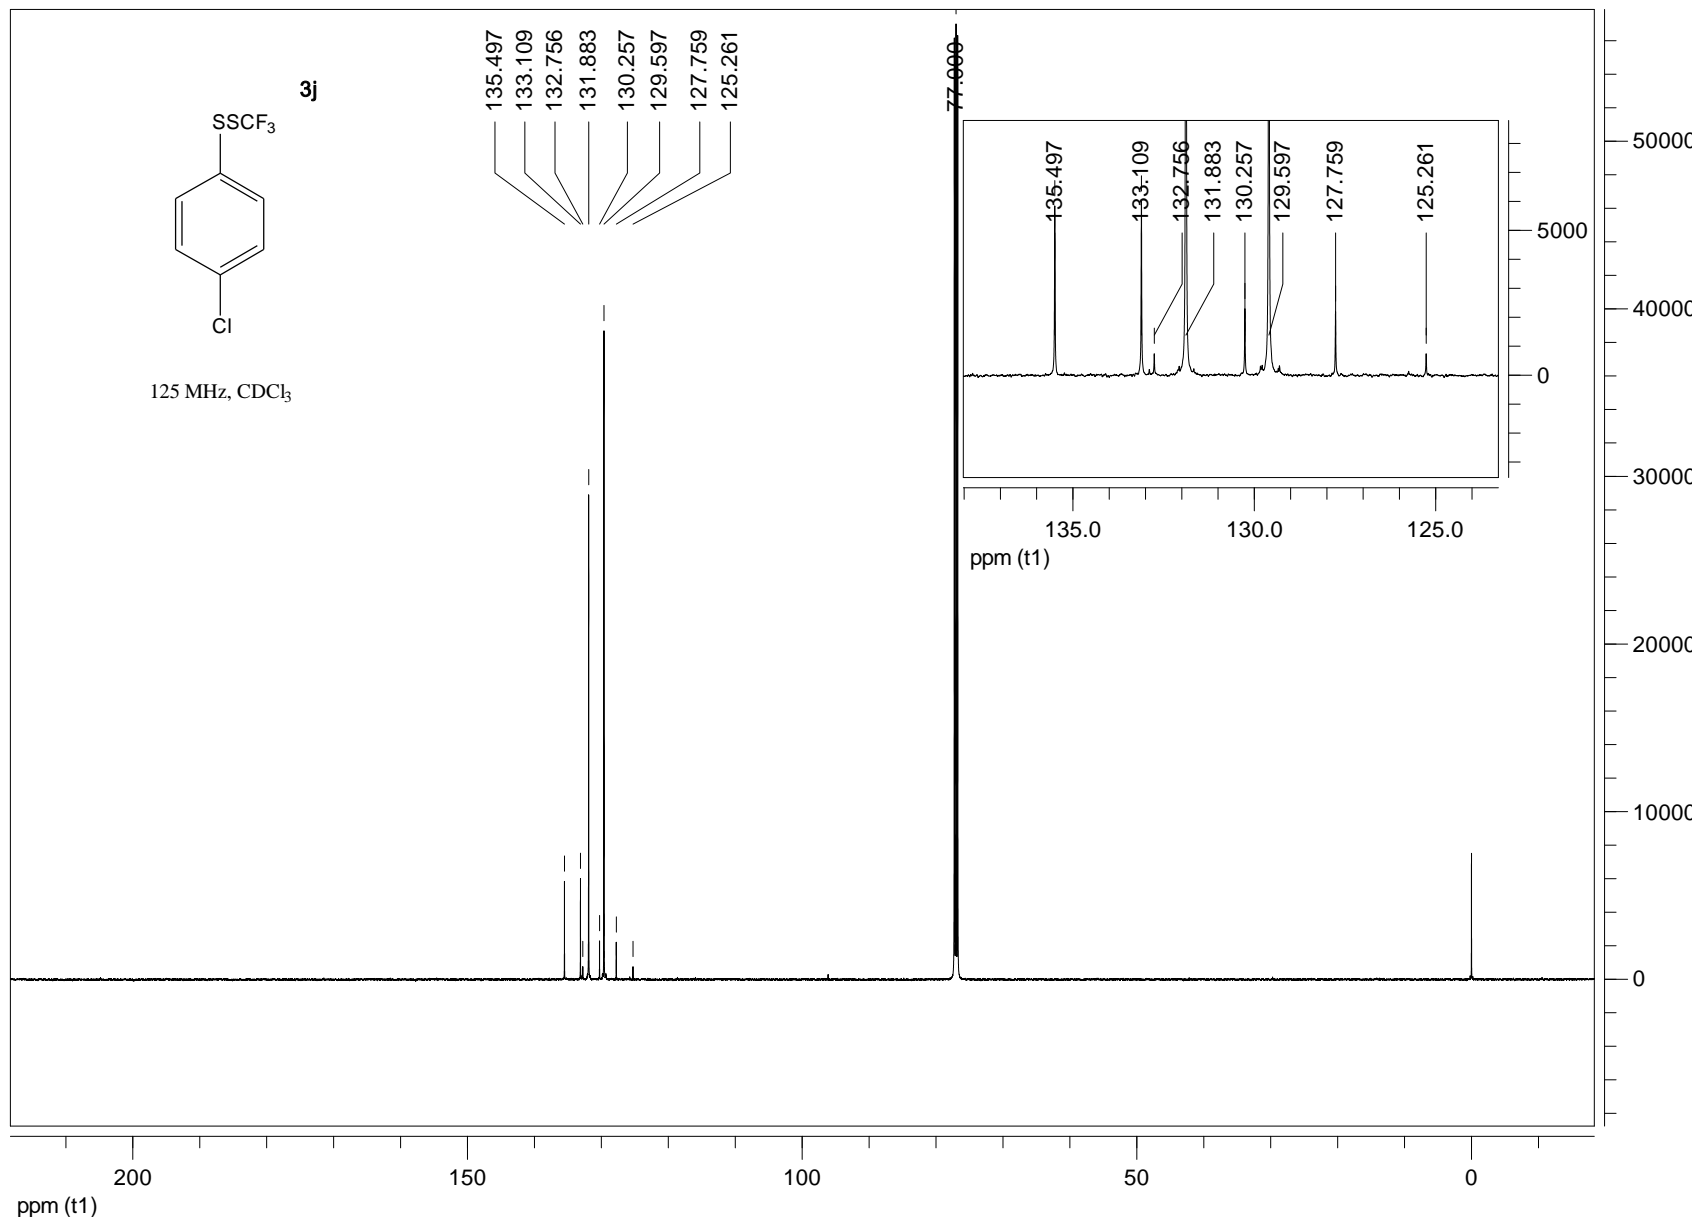

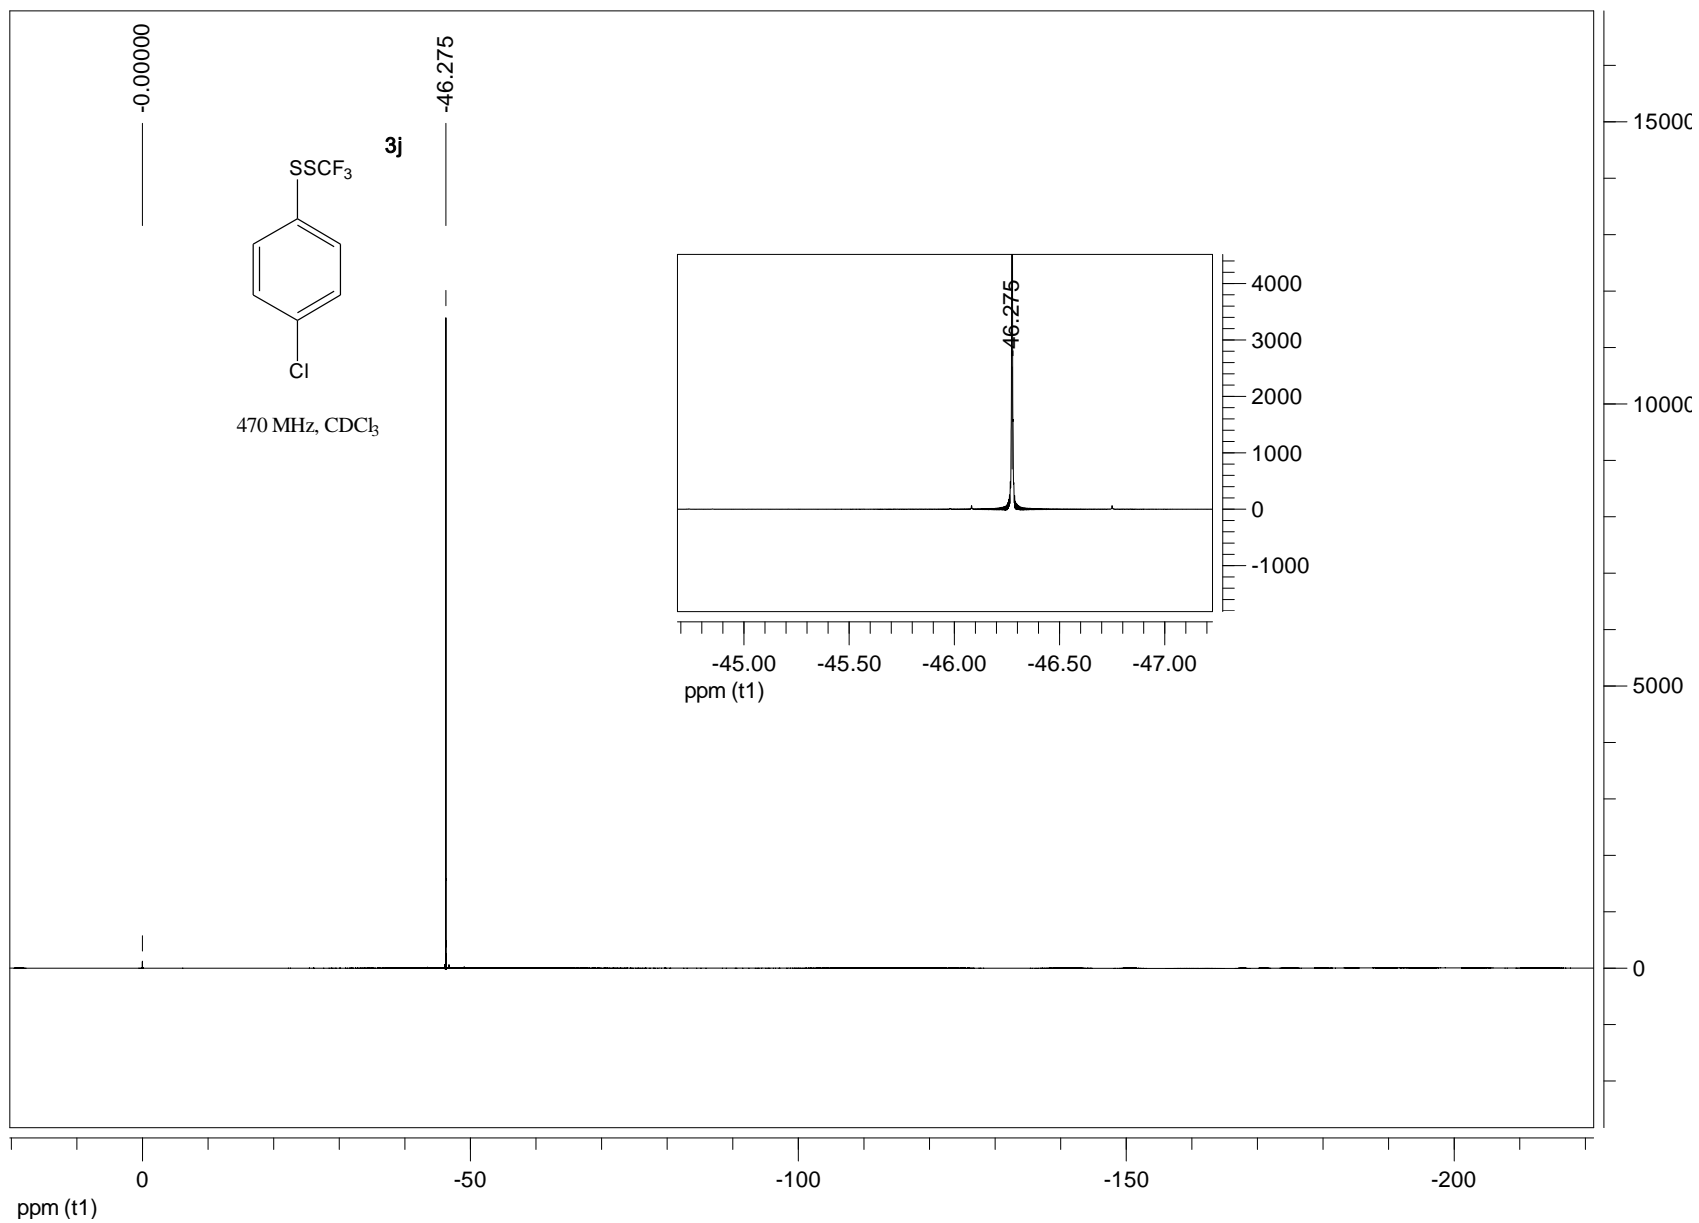

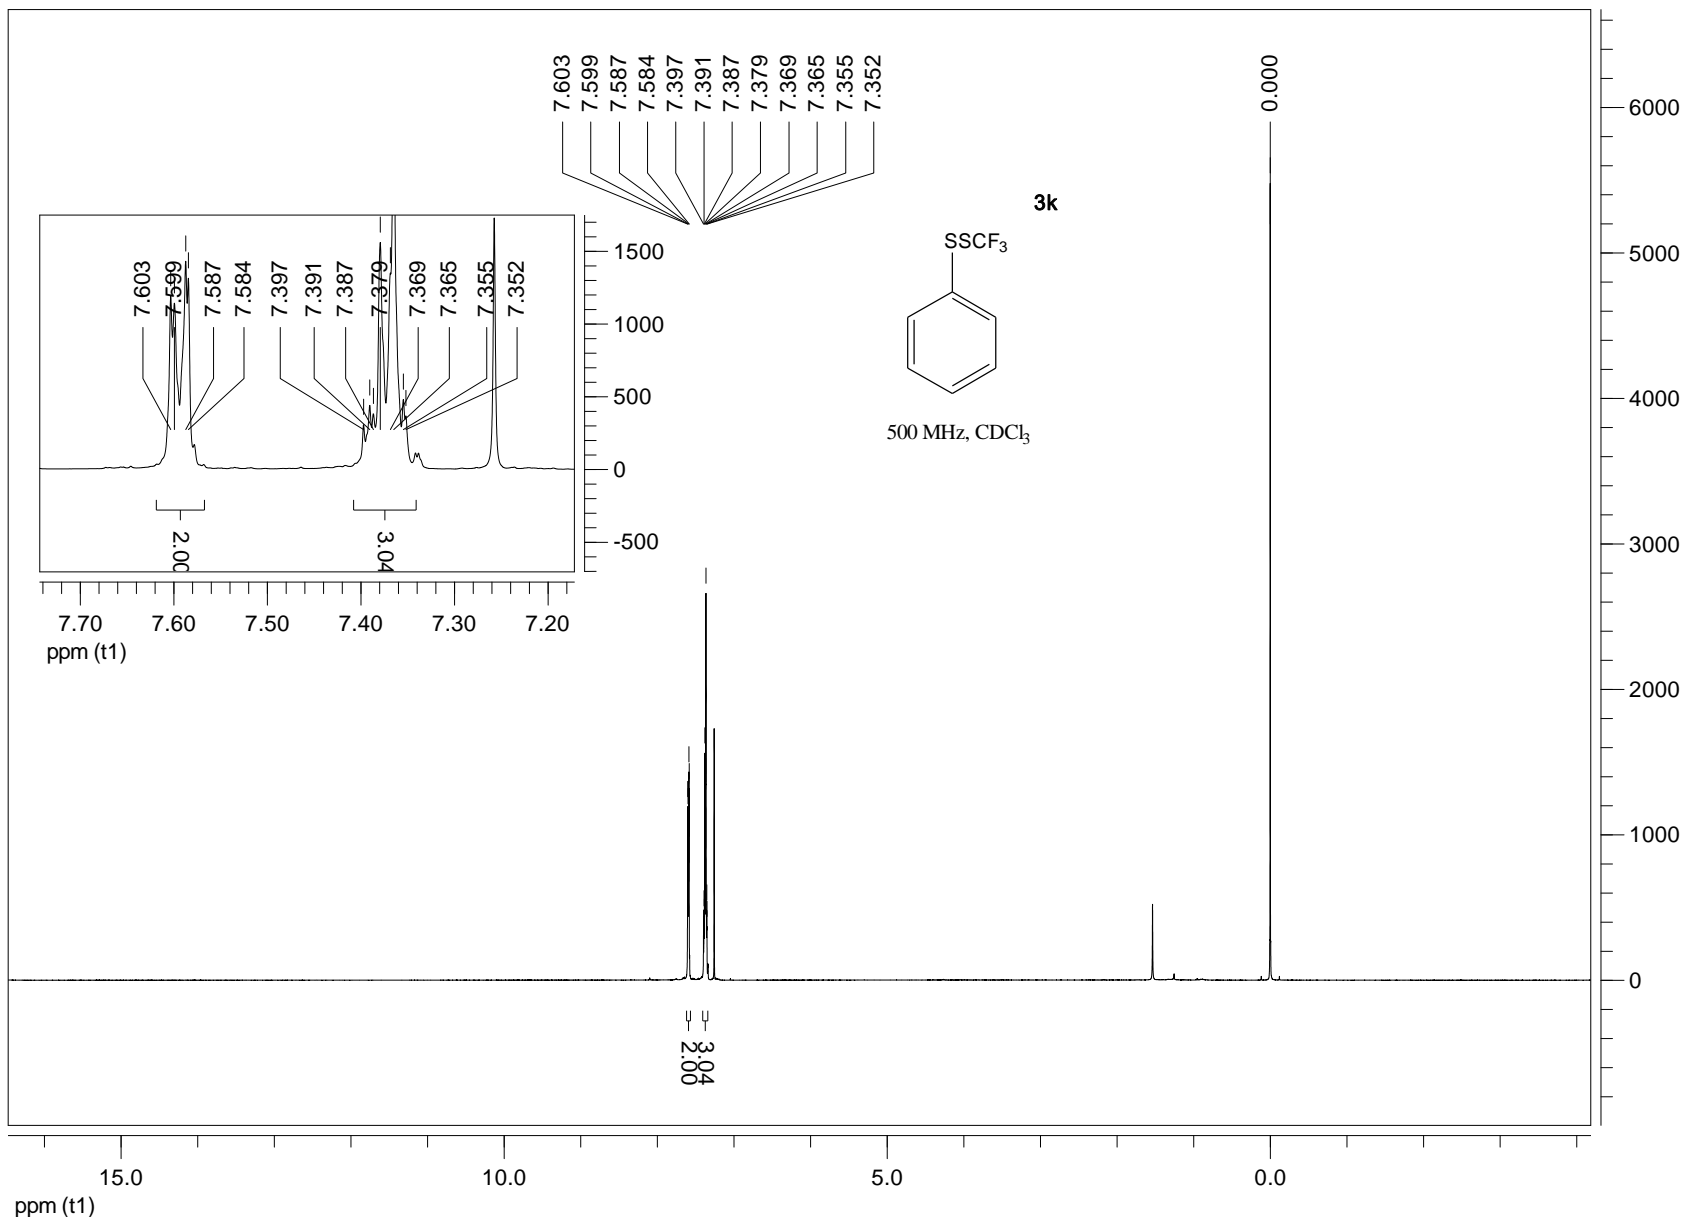

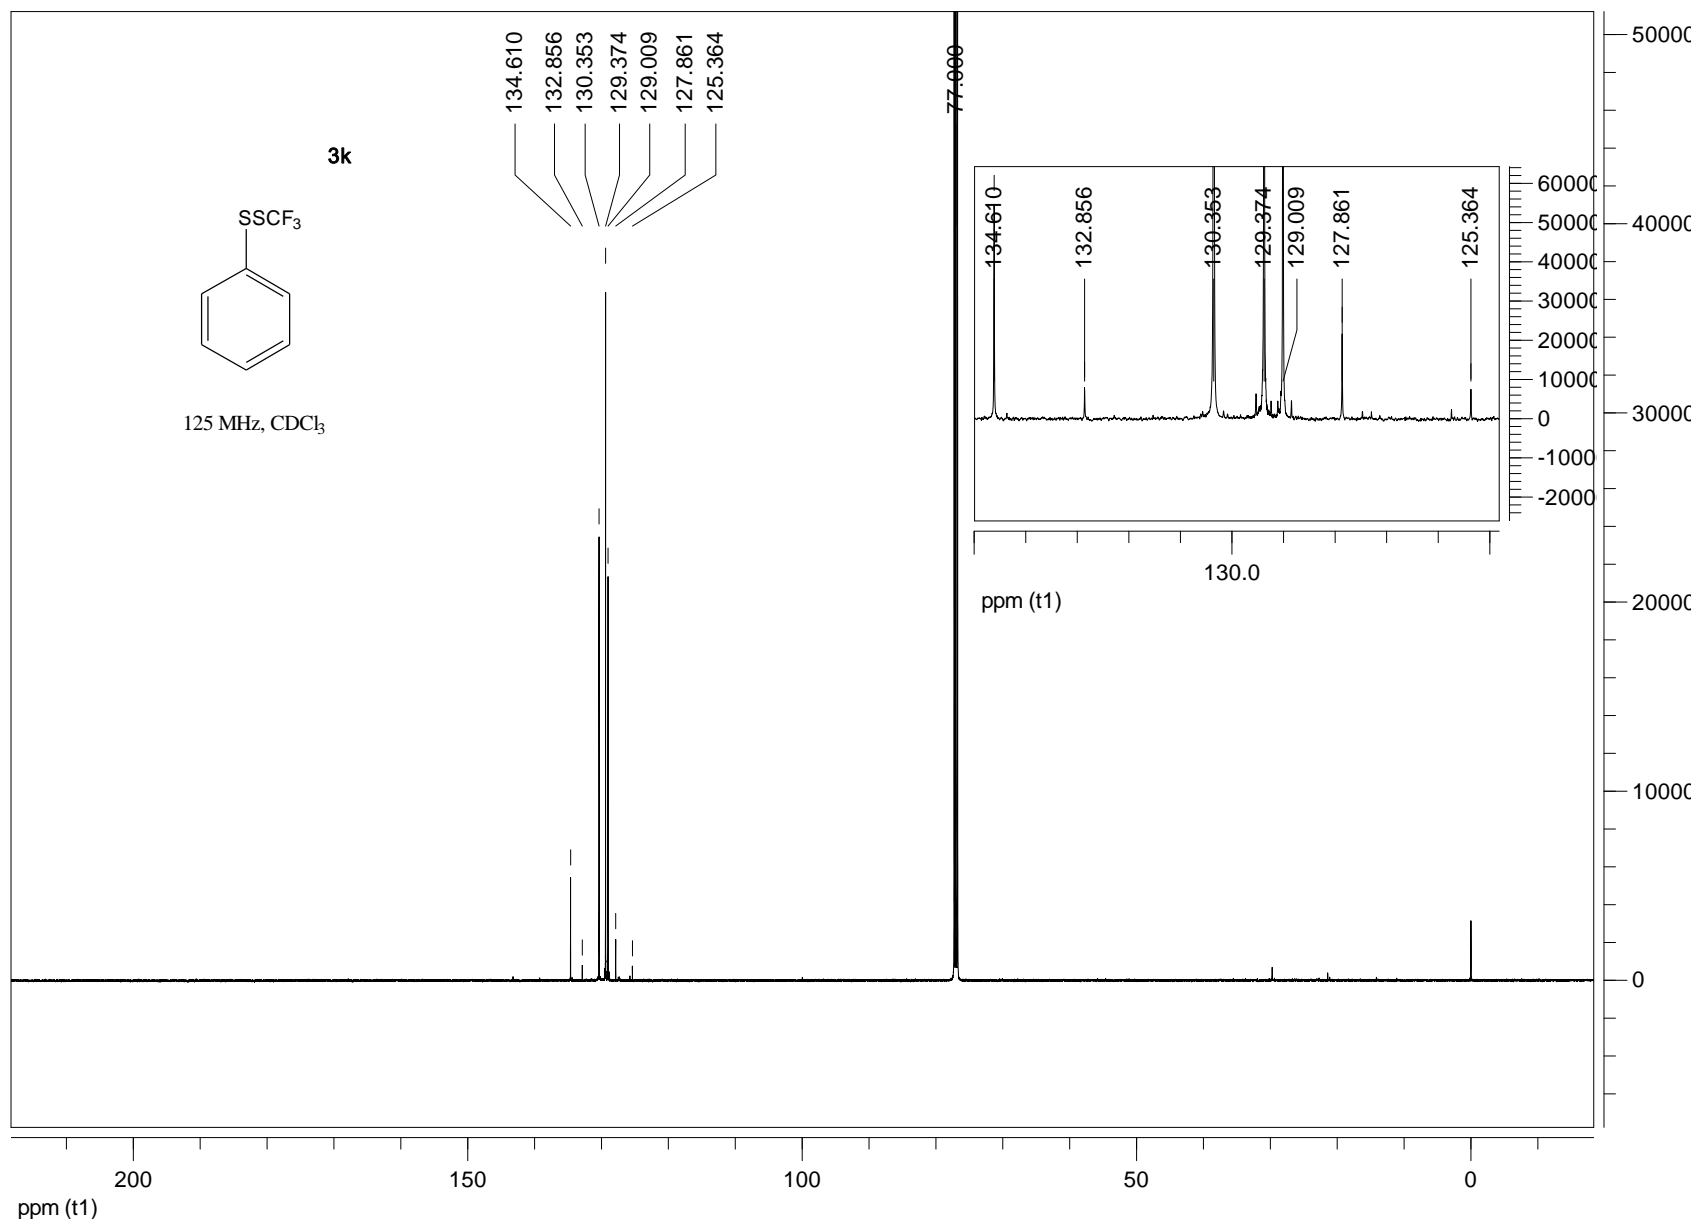

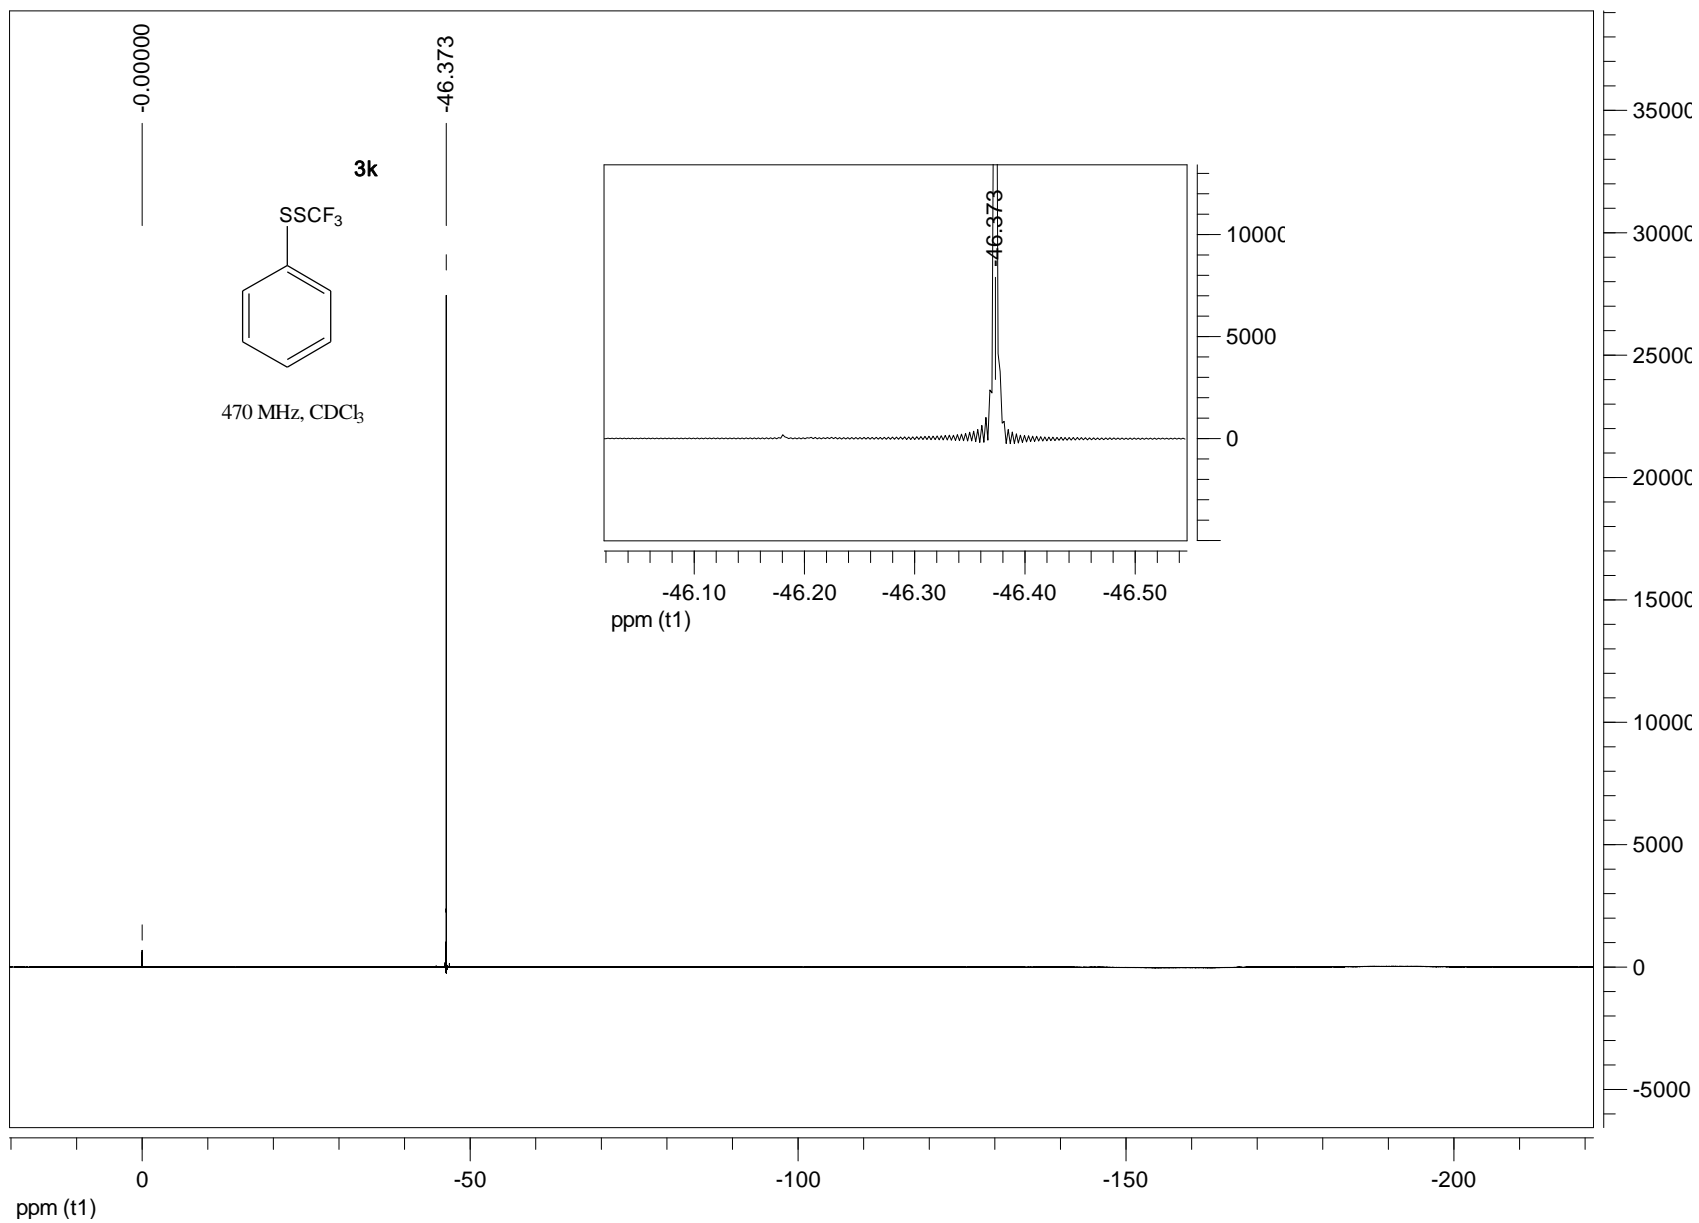

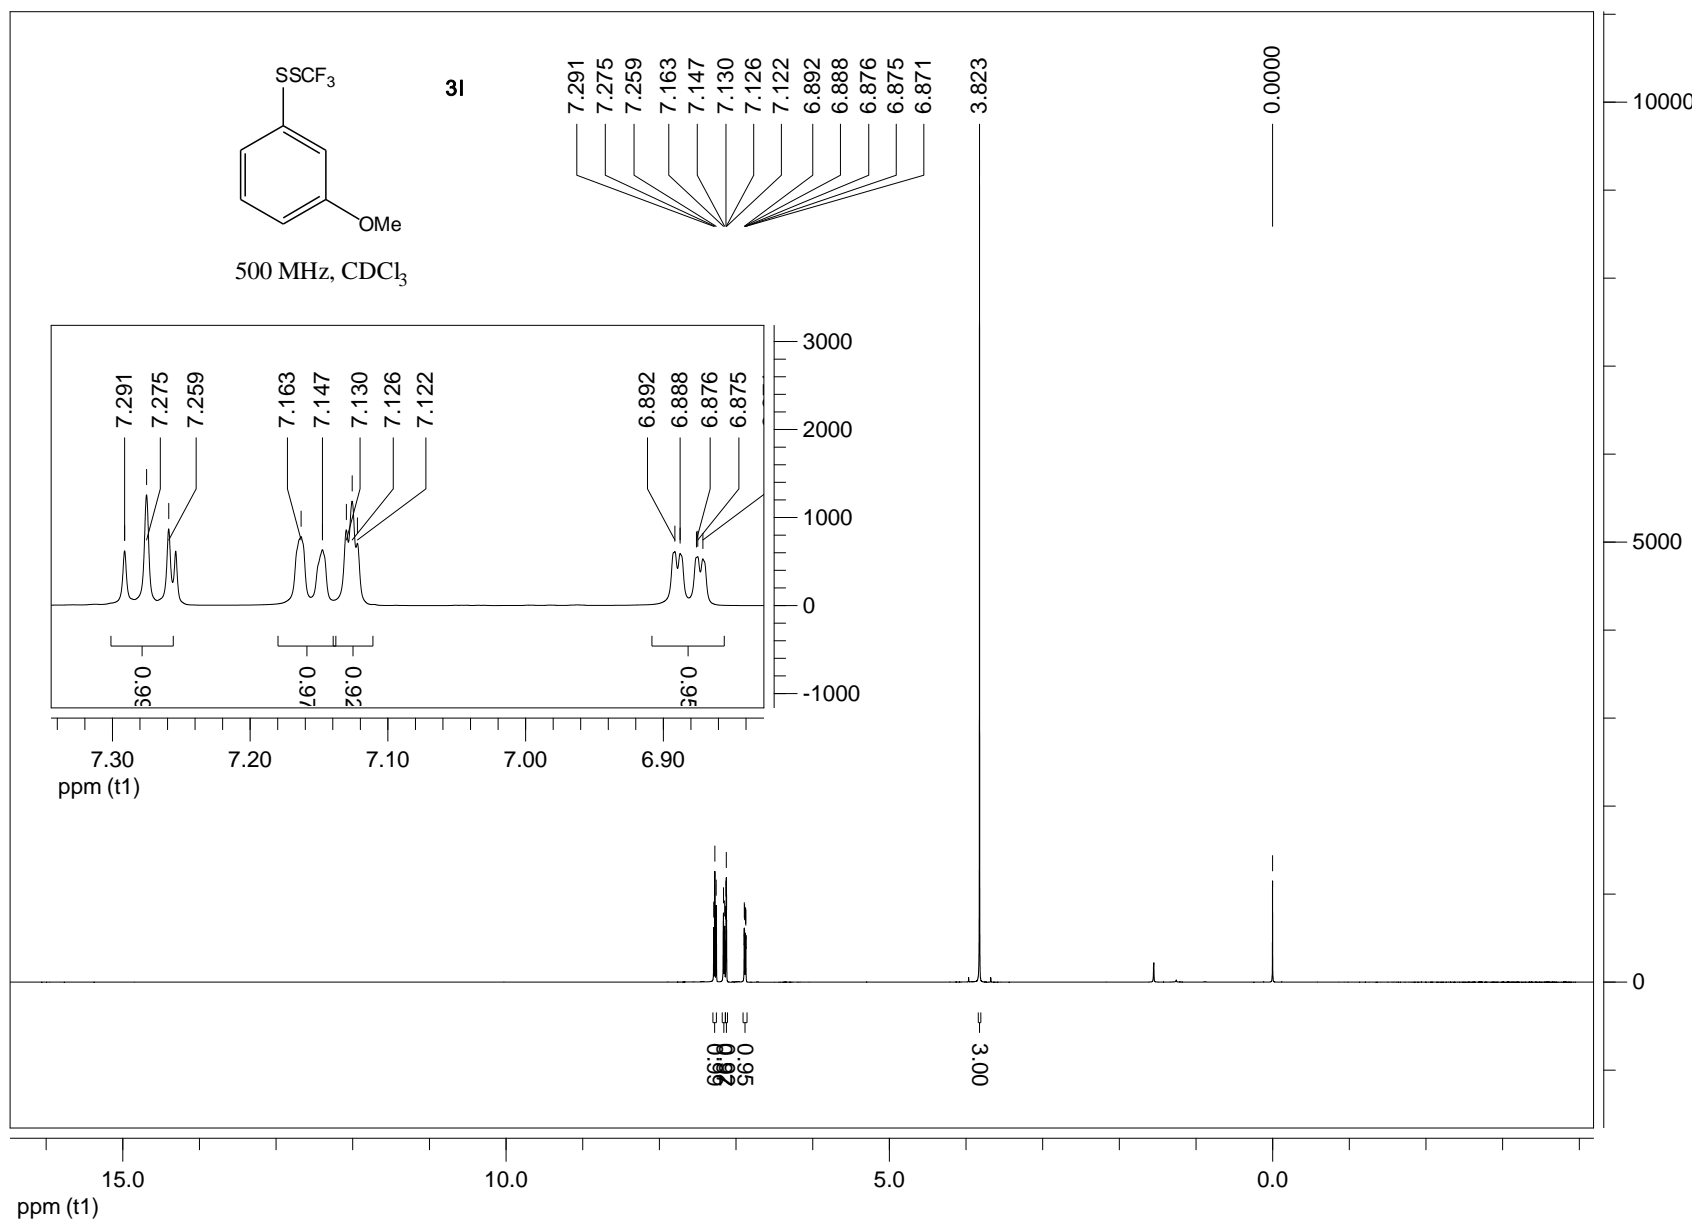



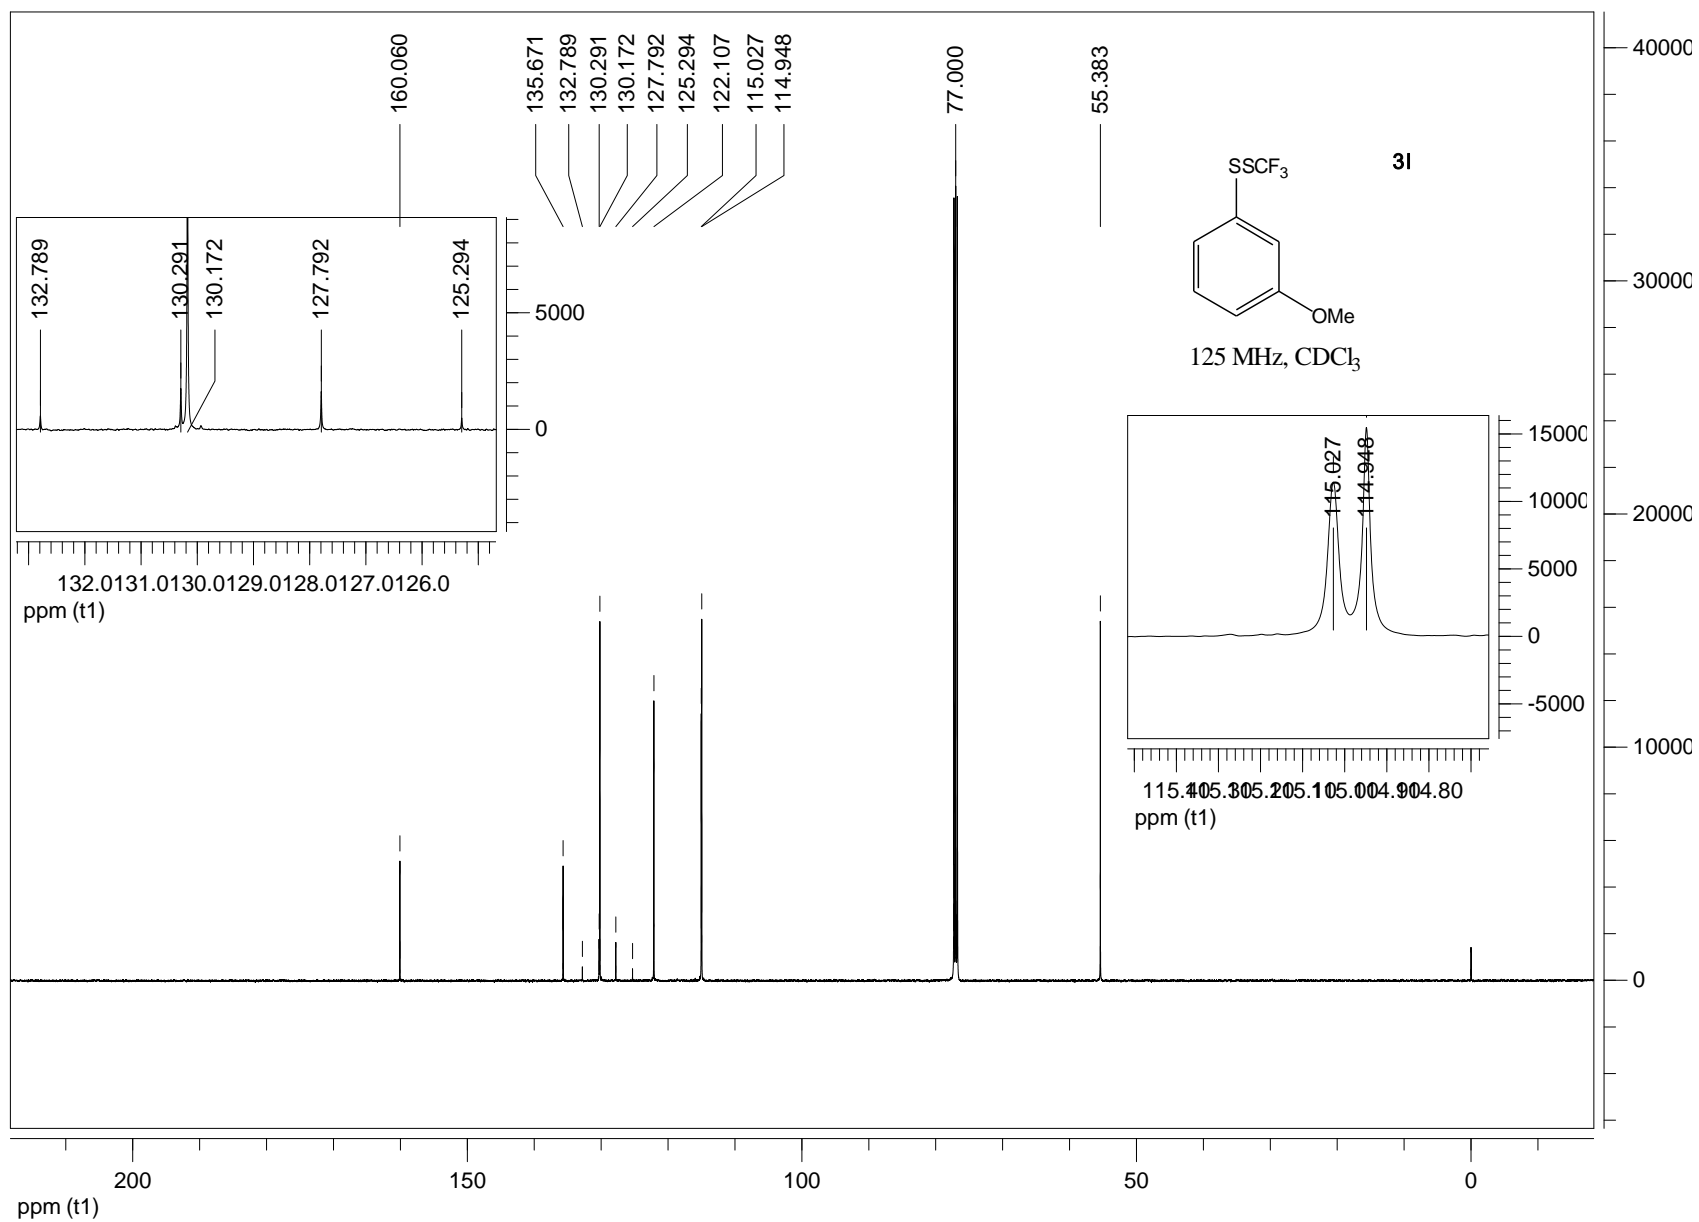

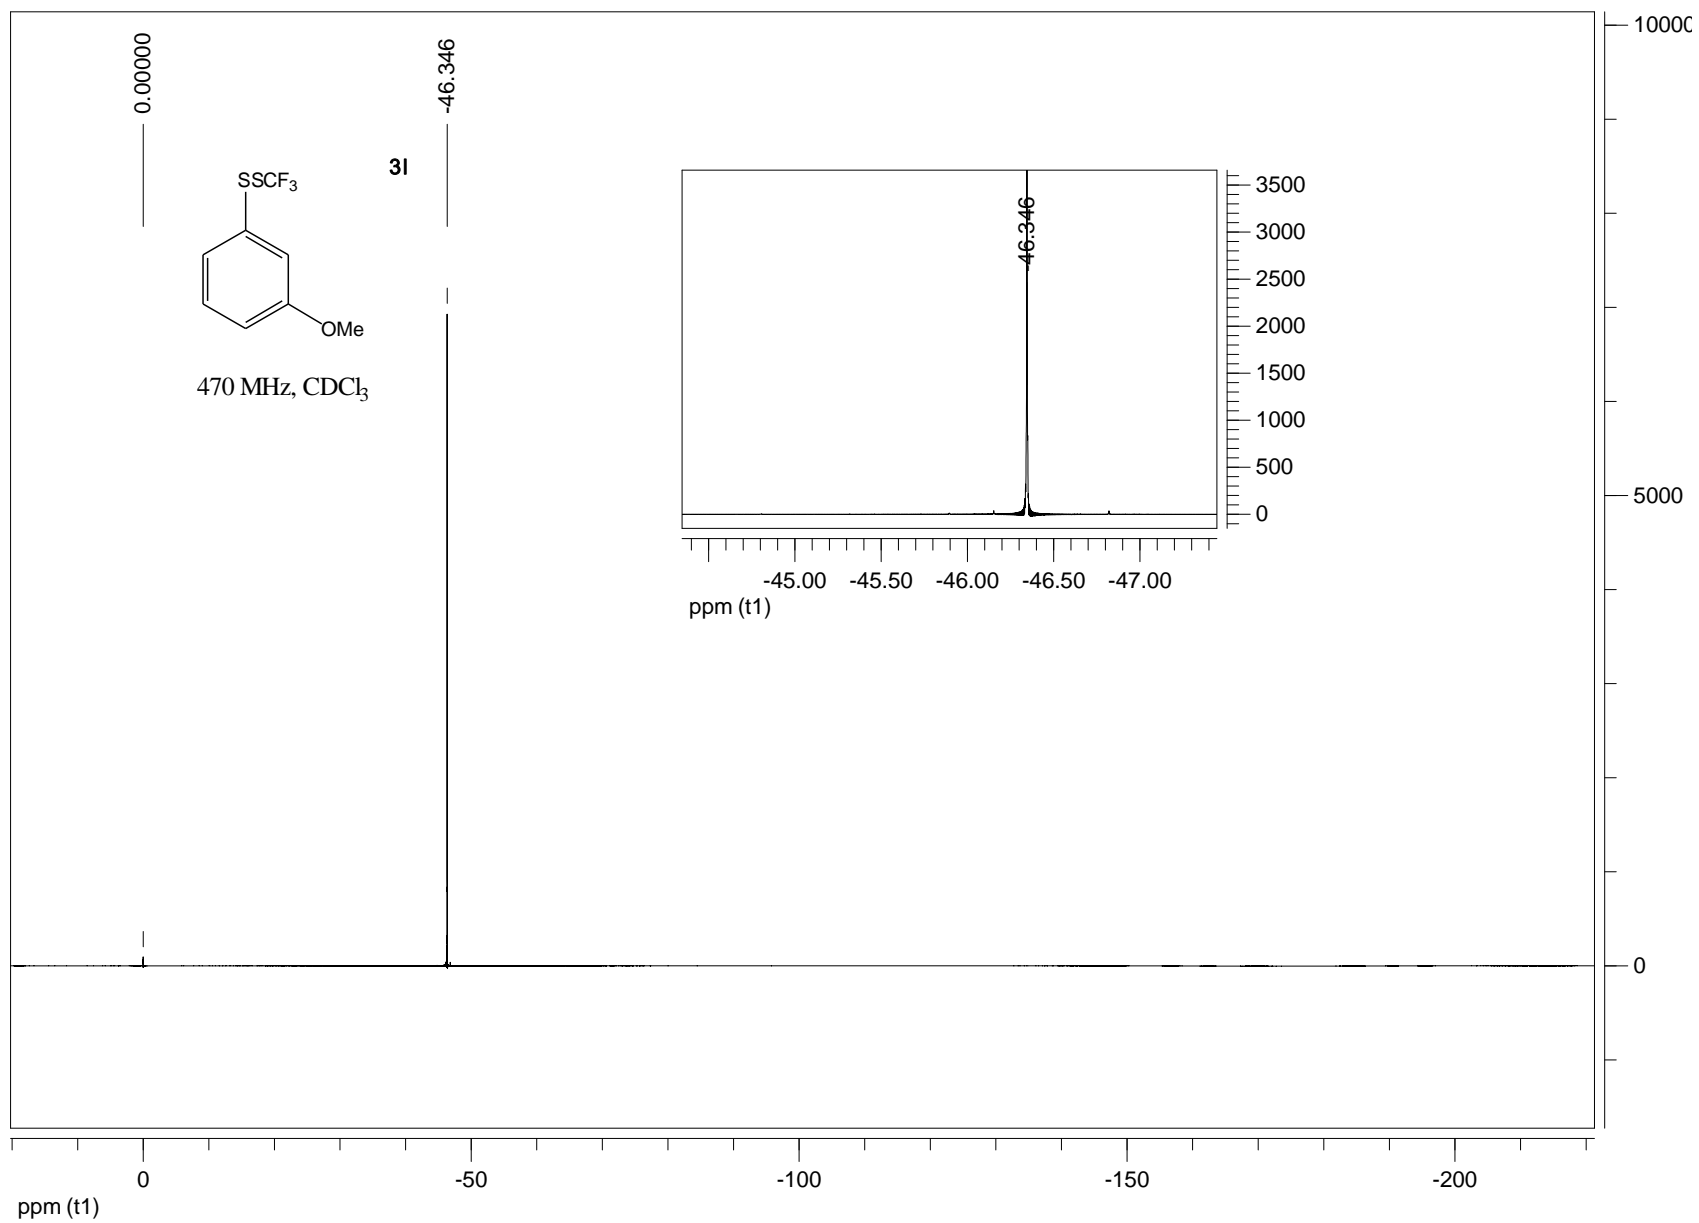

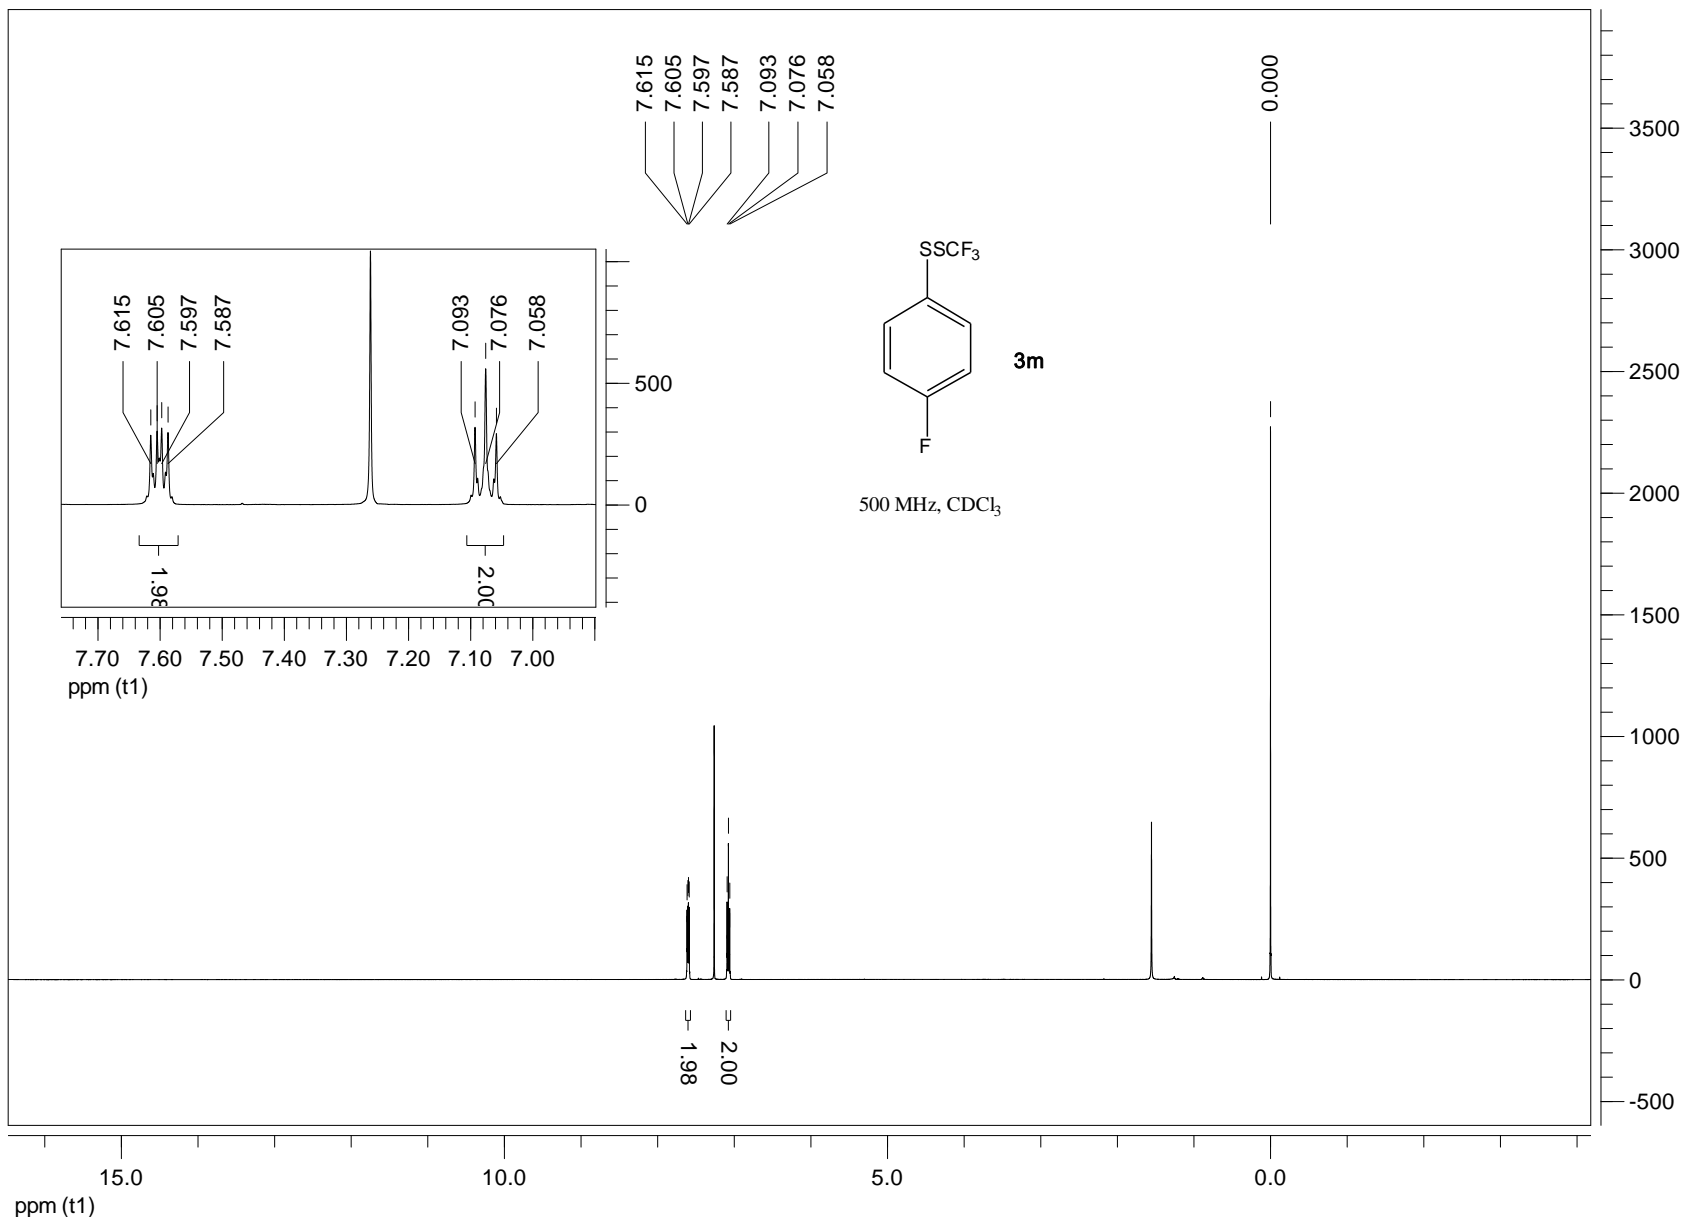

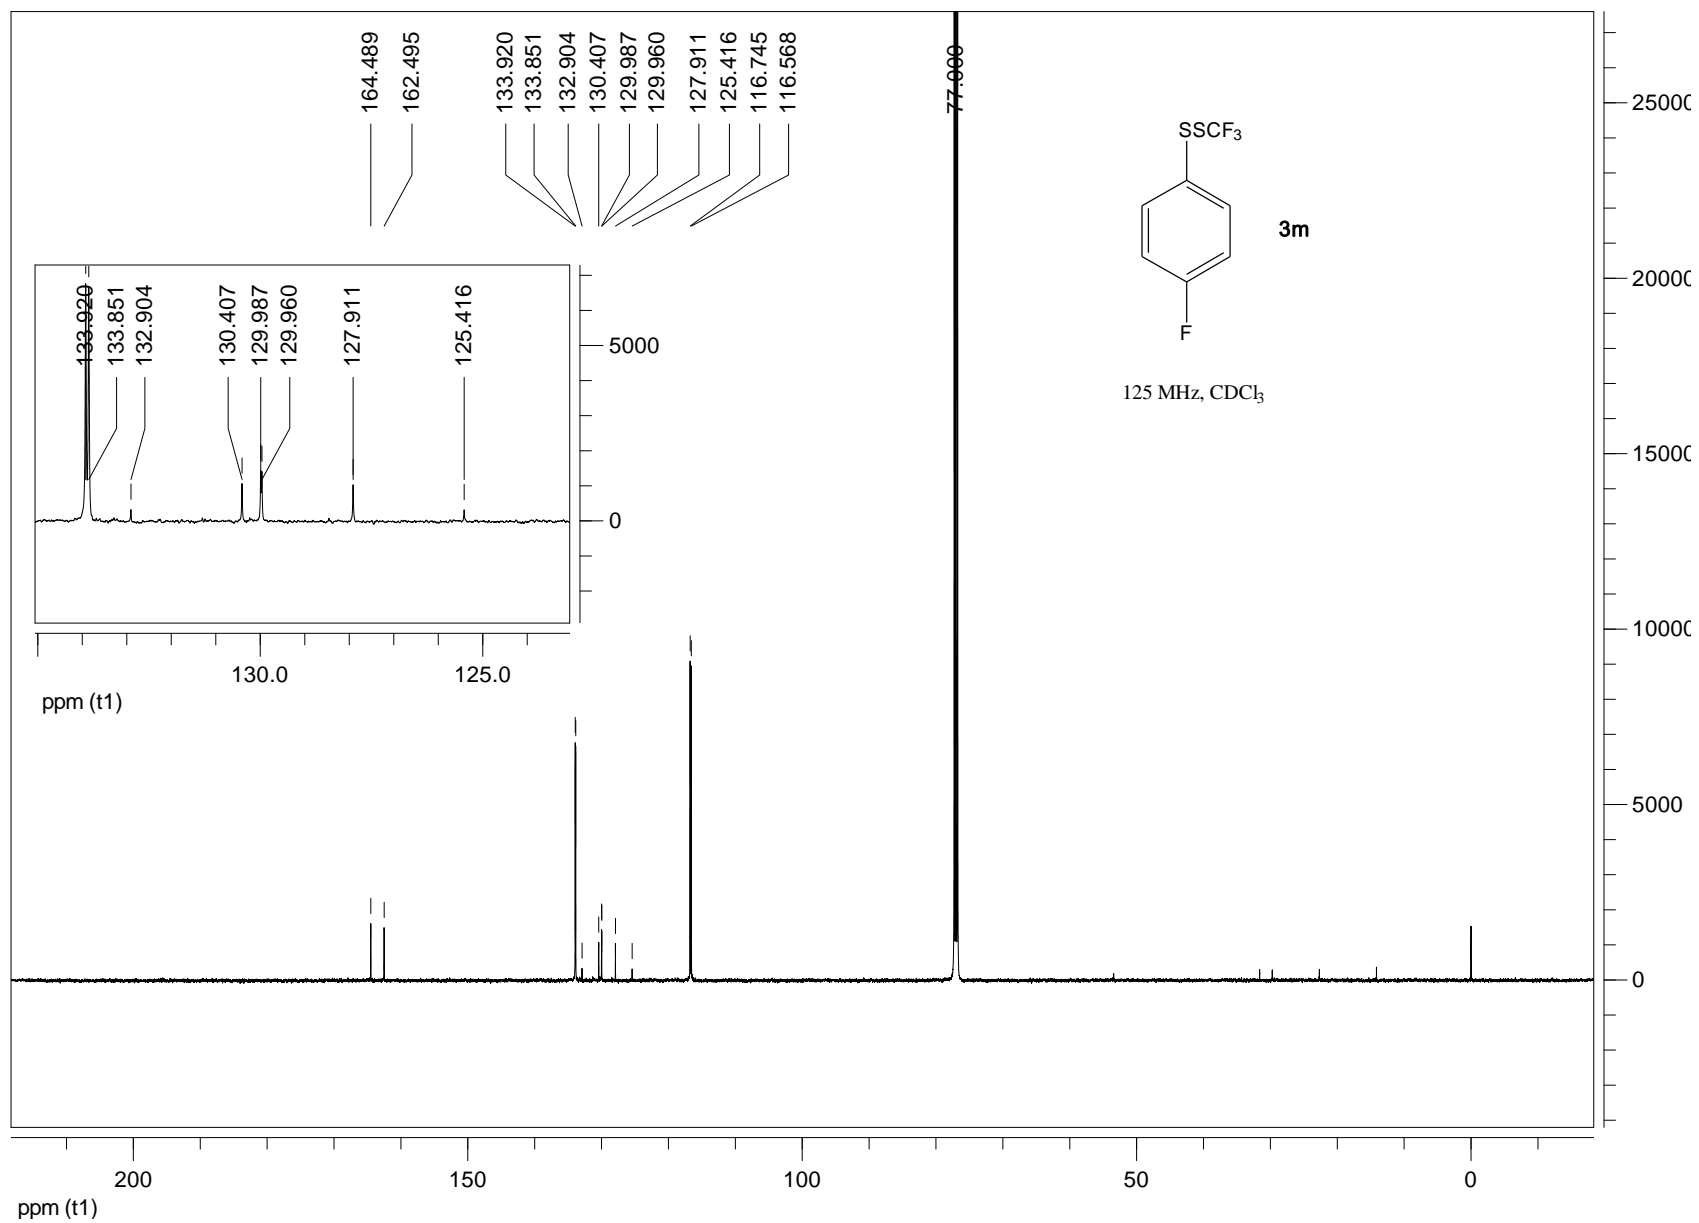

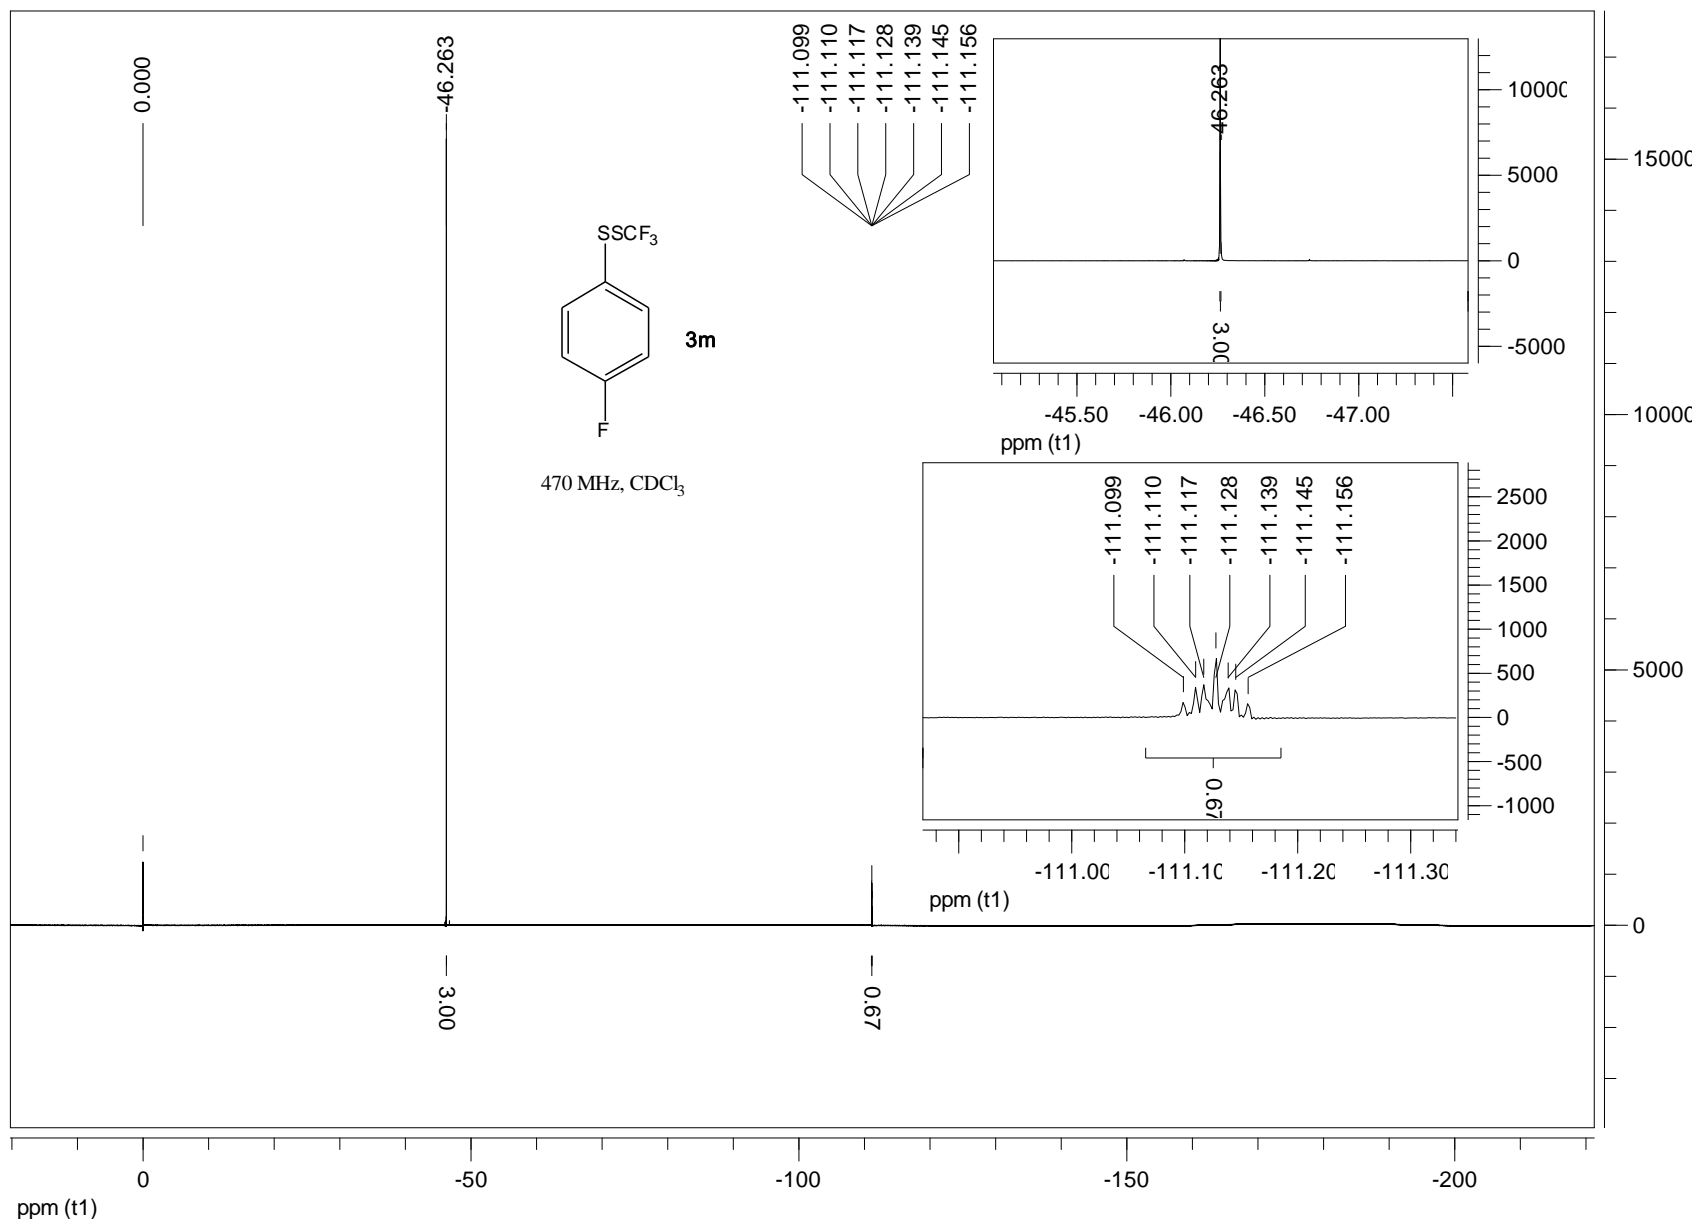



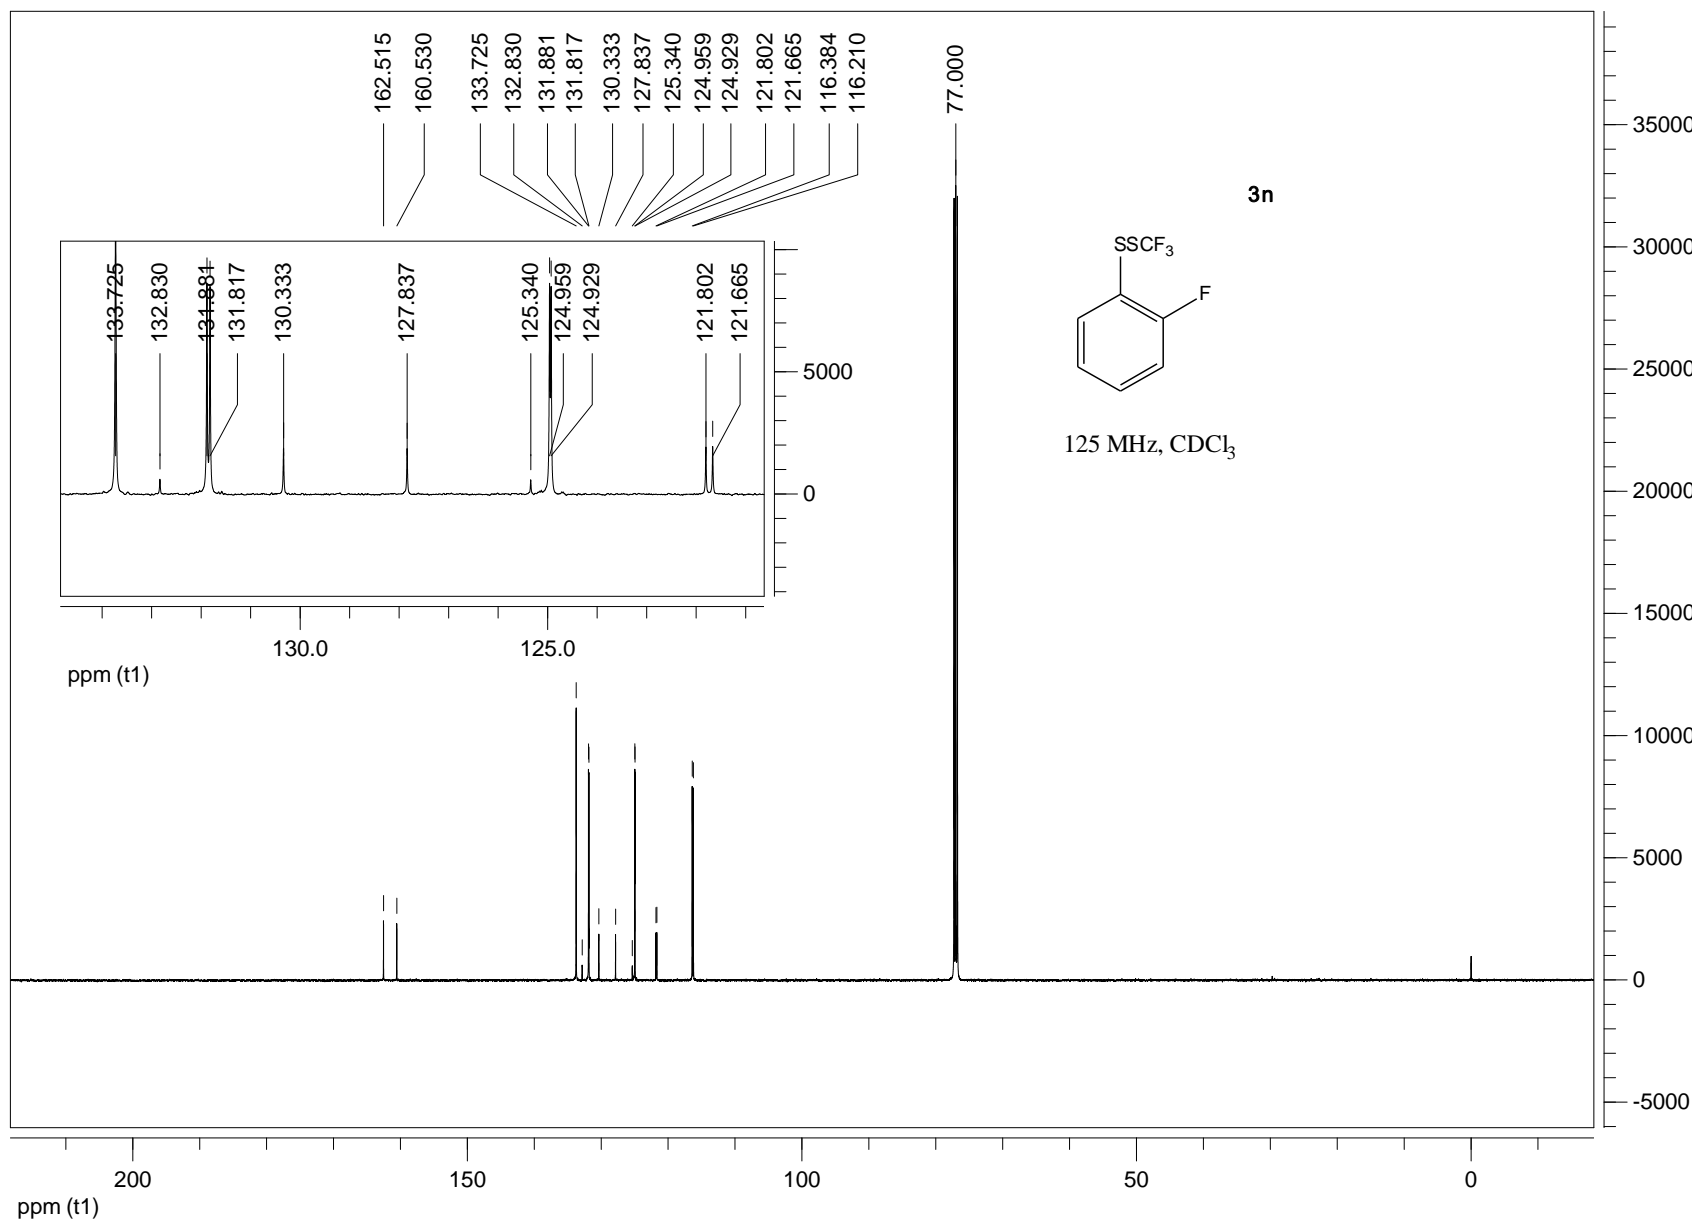

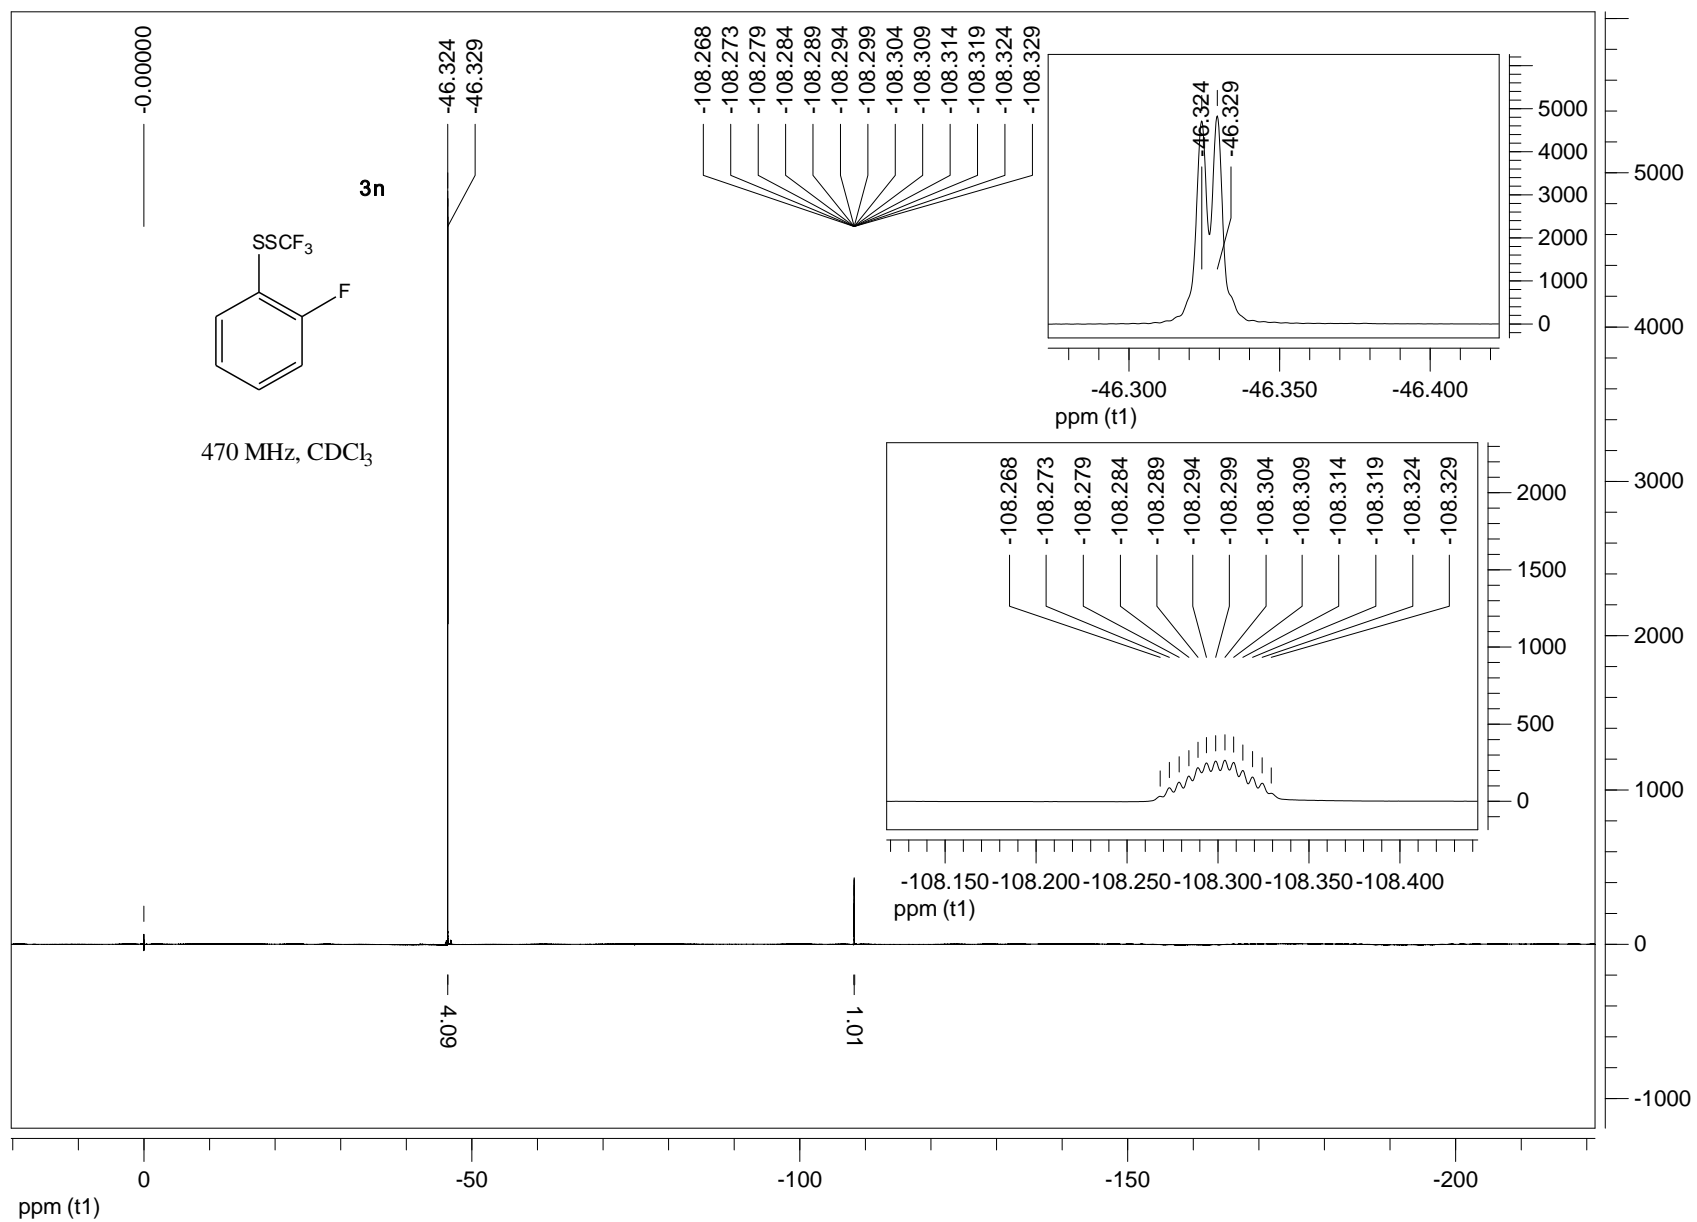



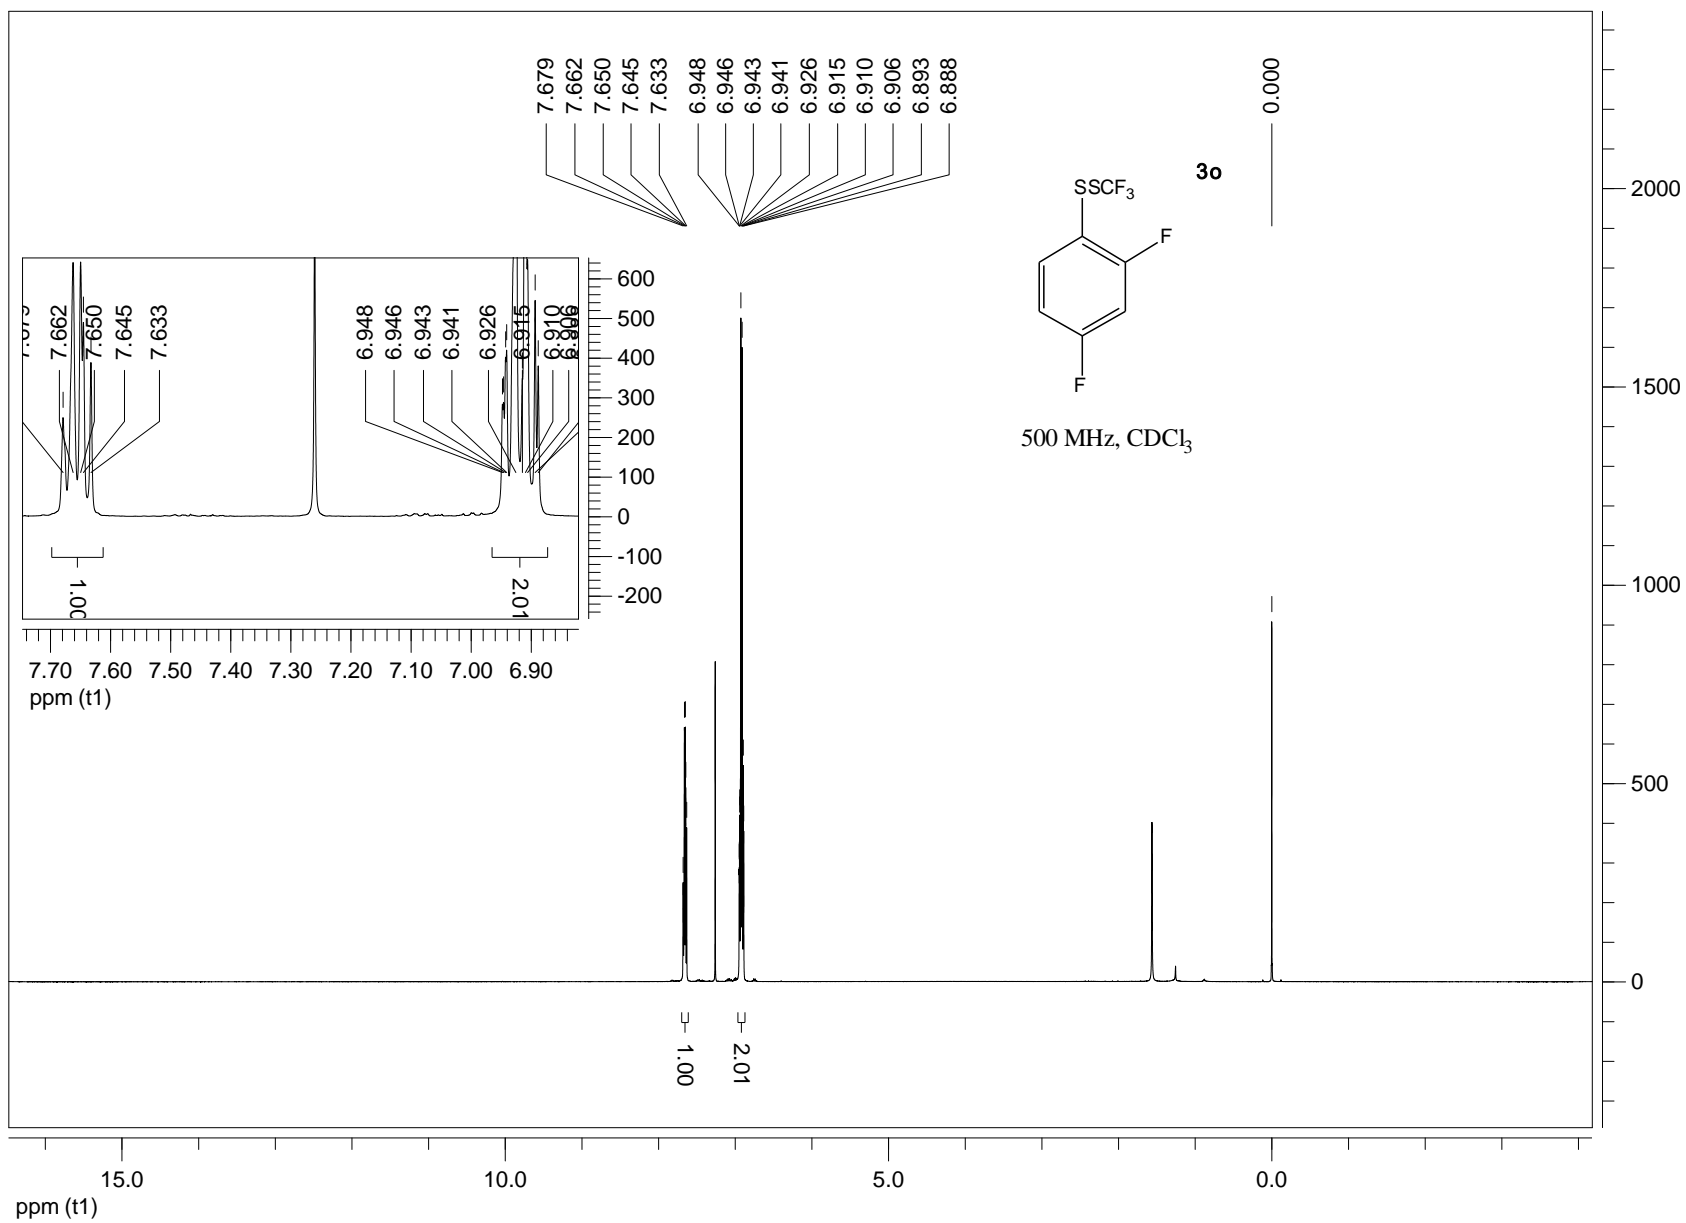

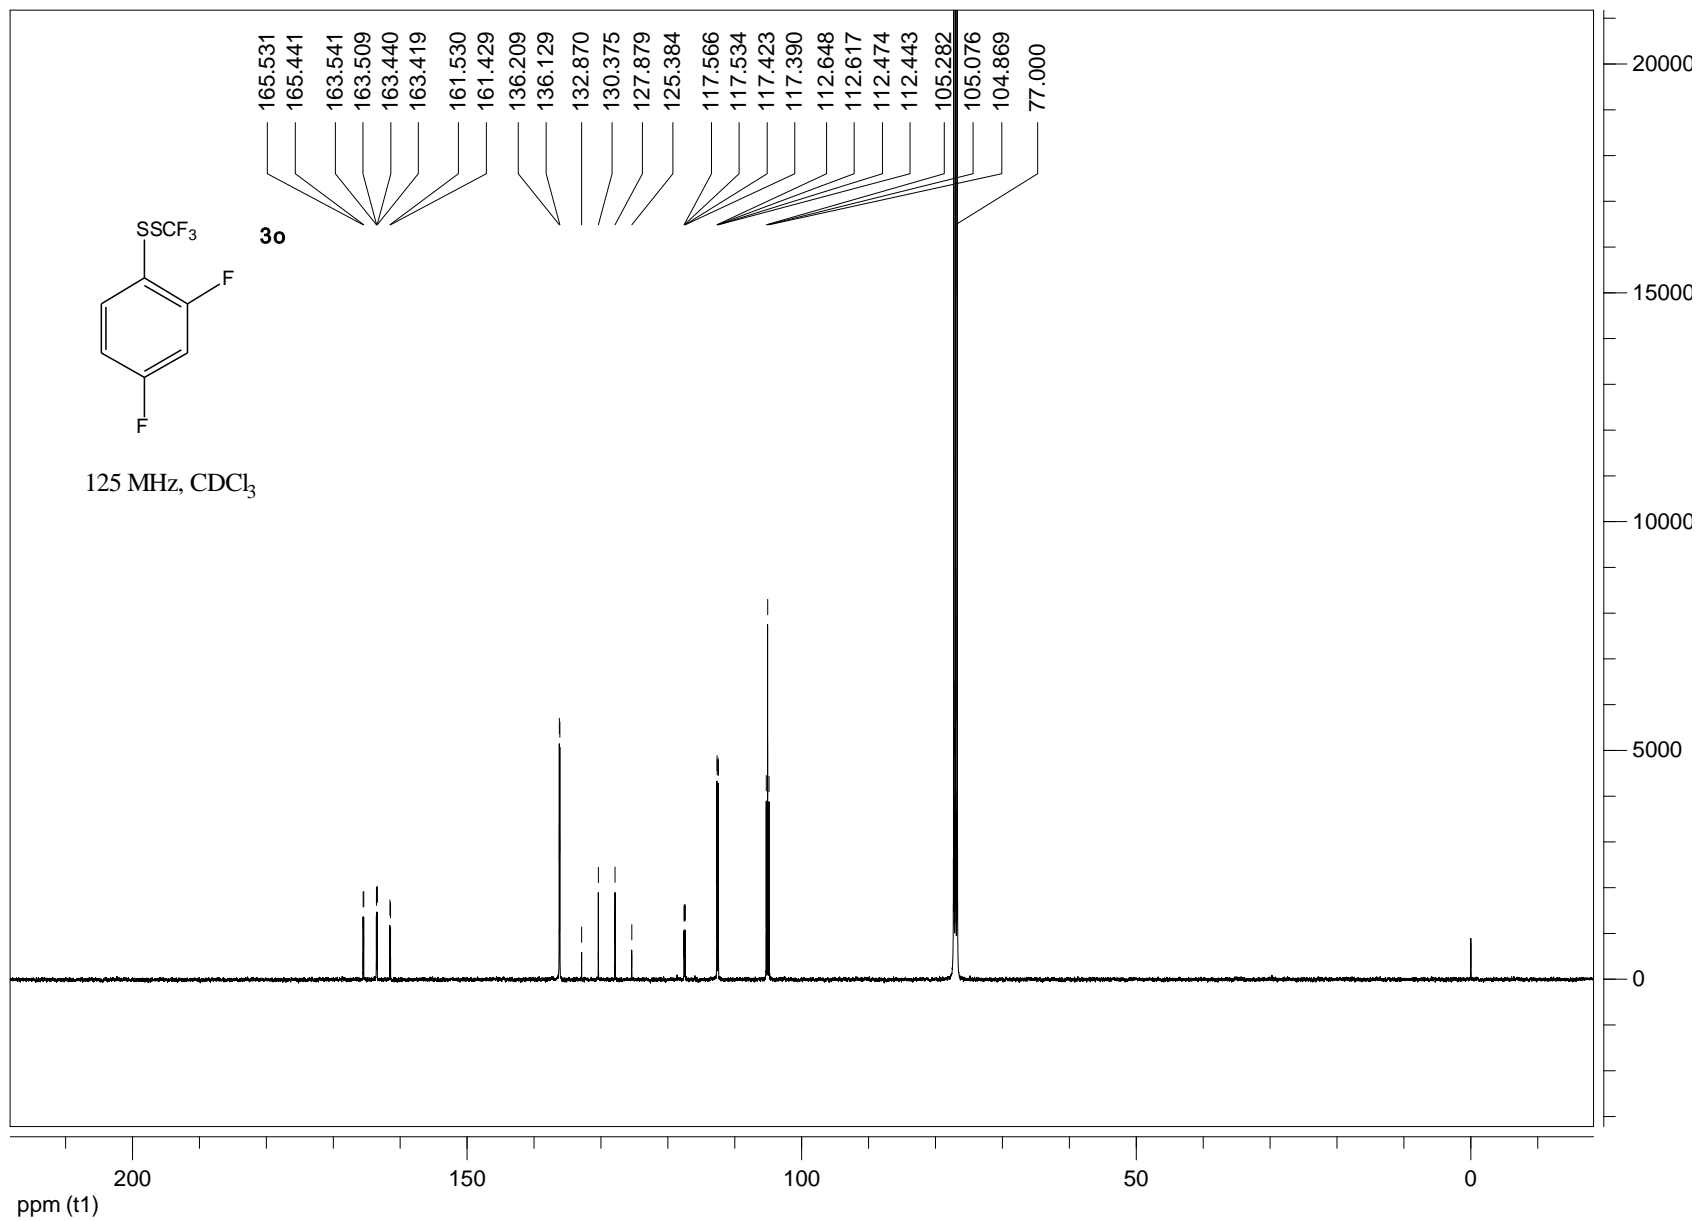

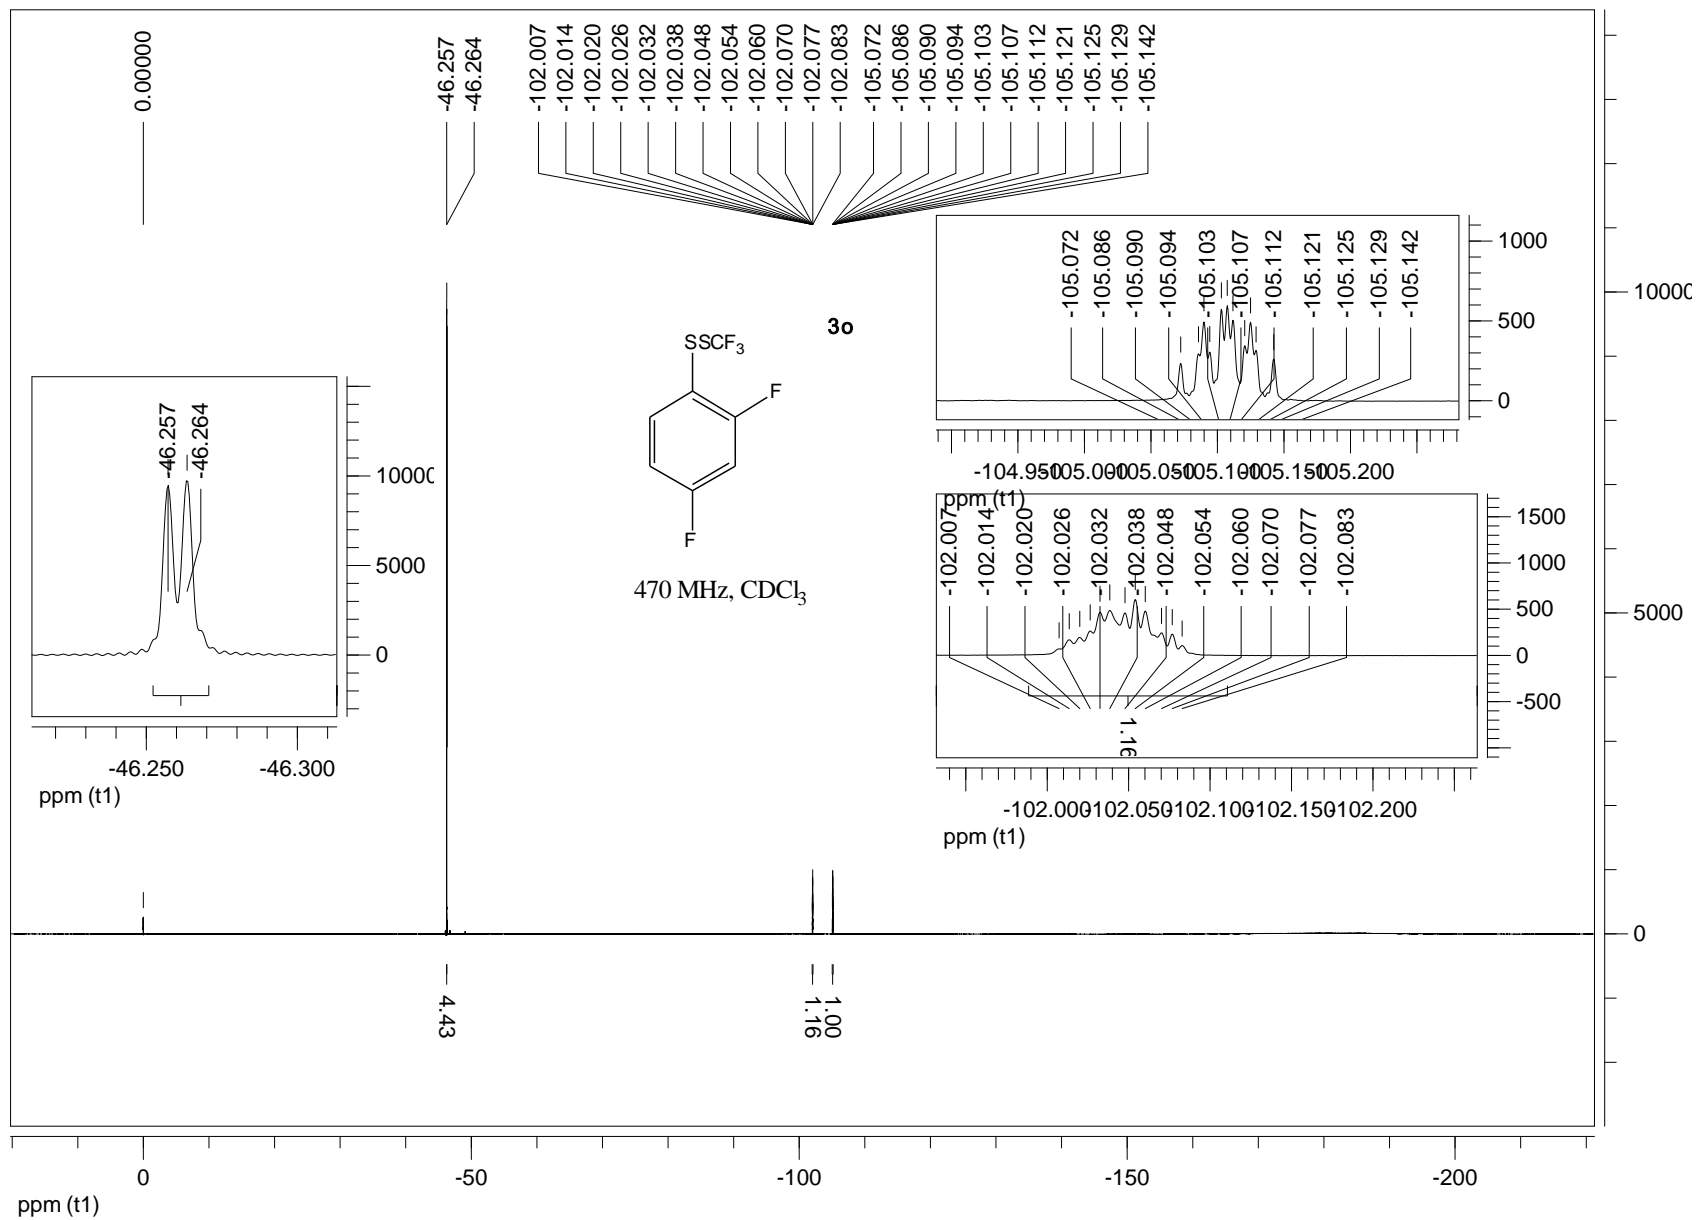

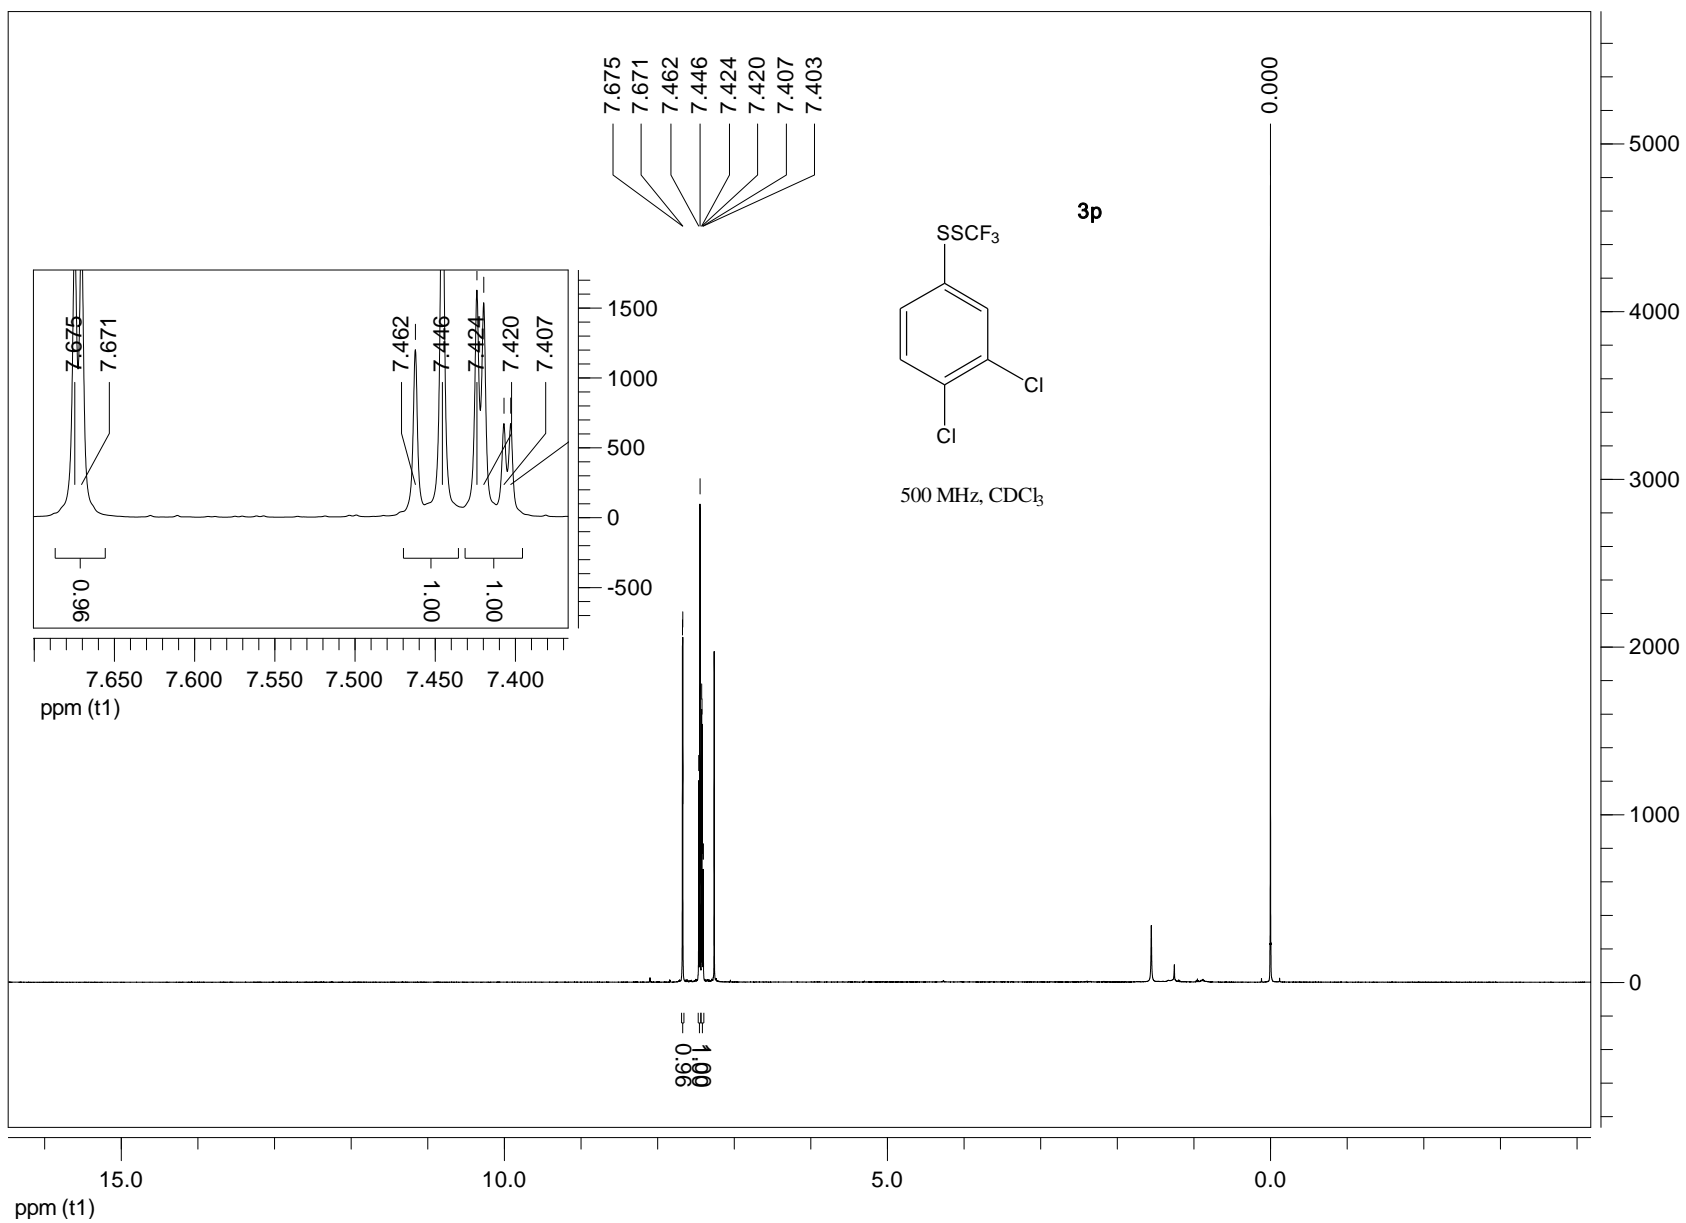

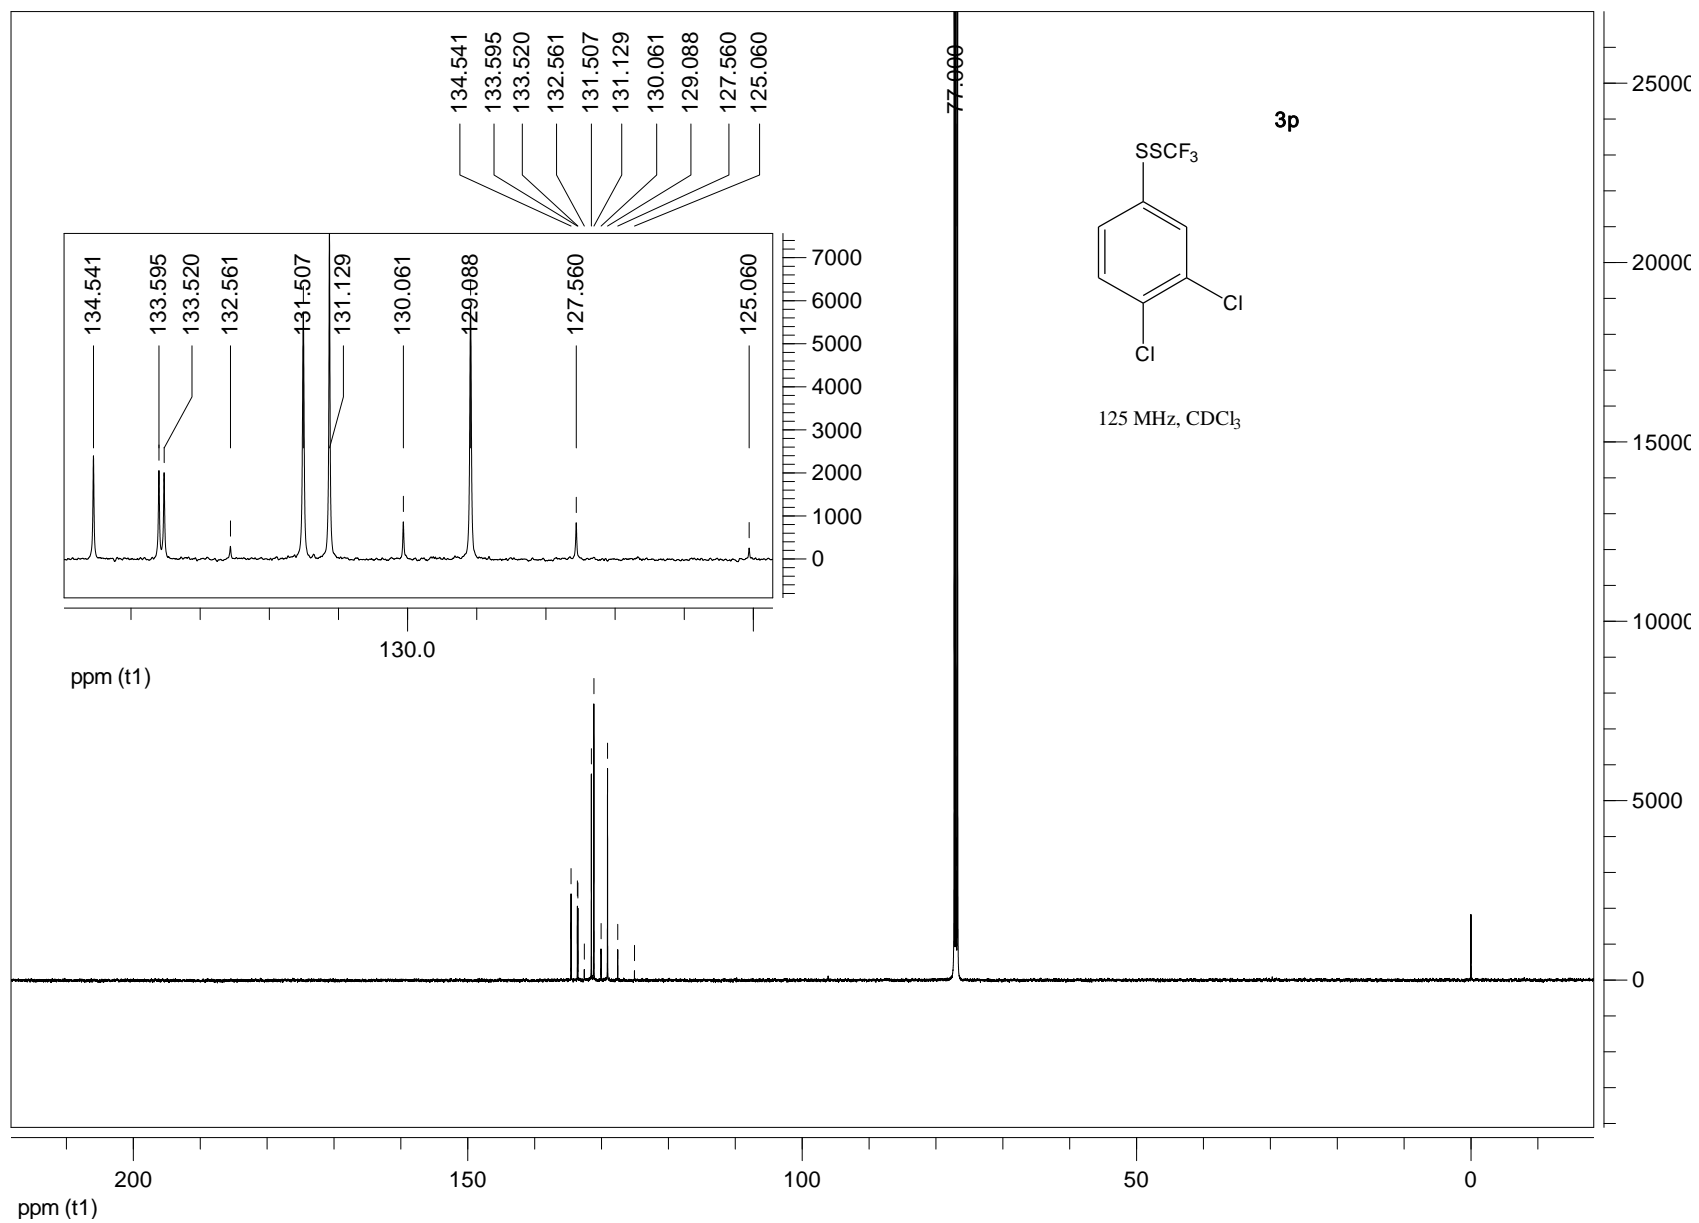

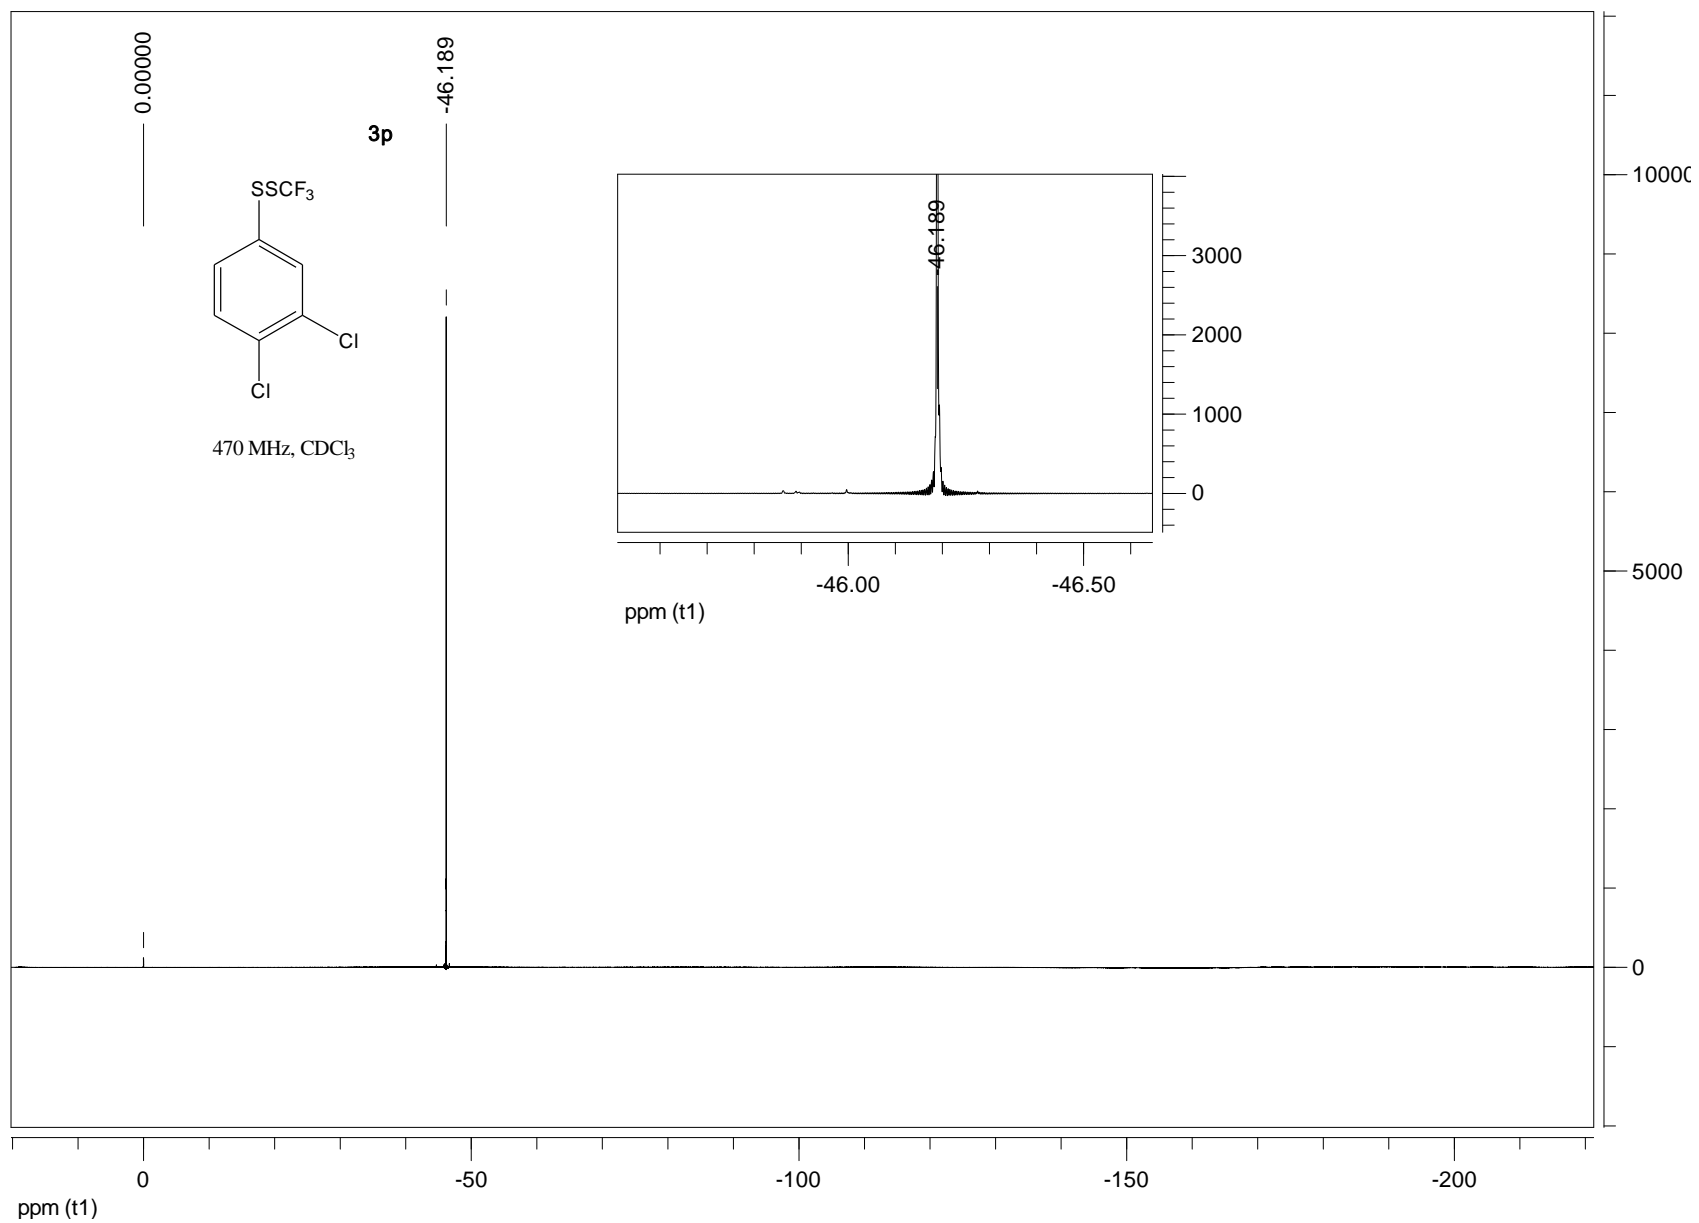

S50

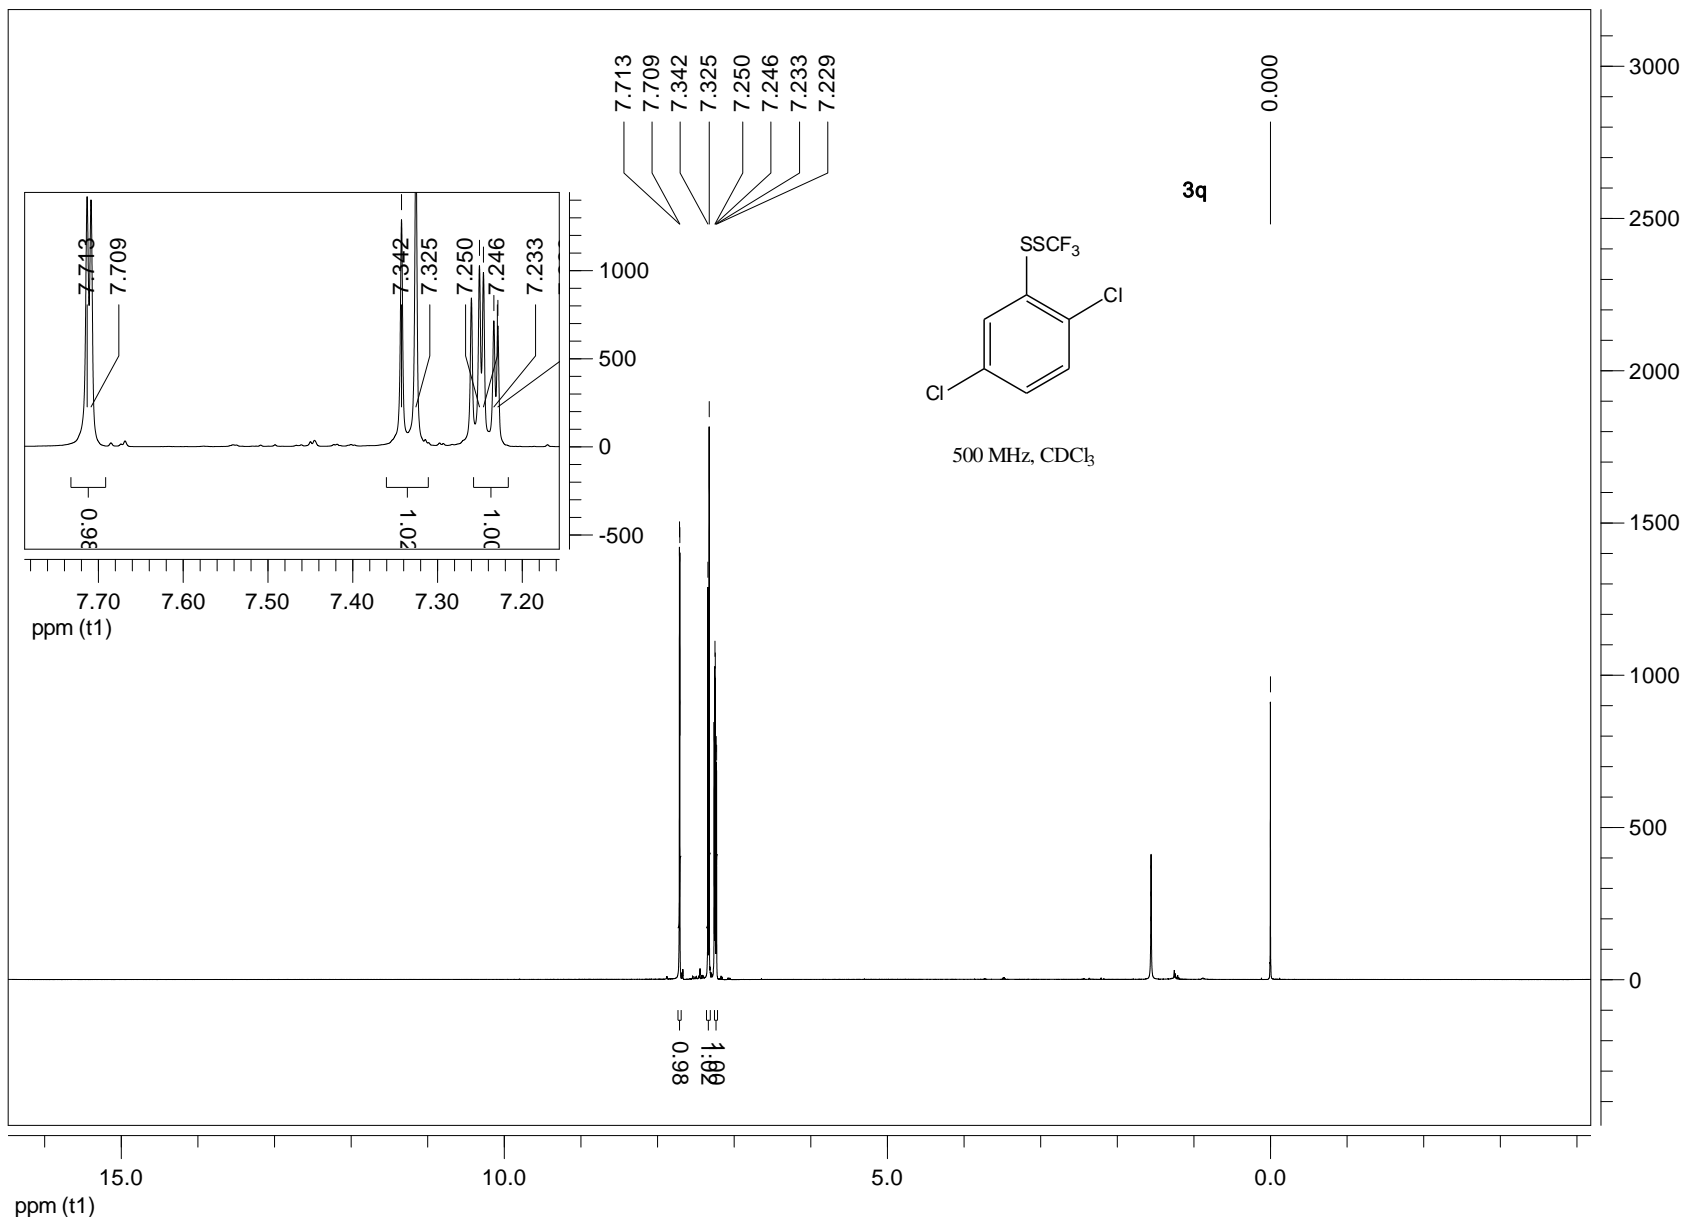

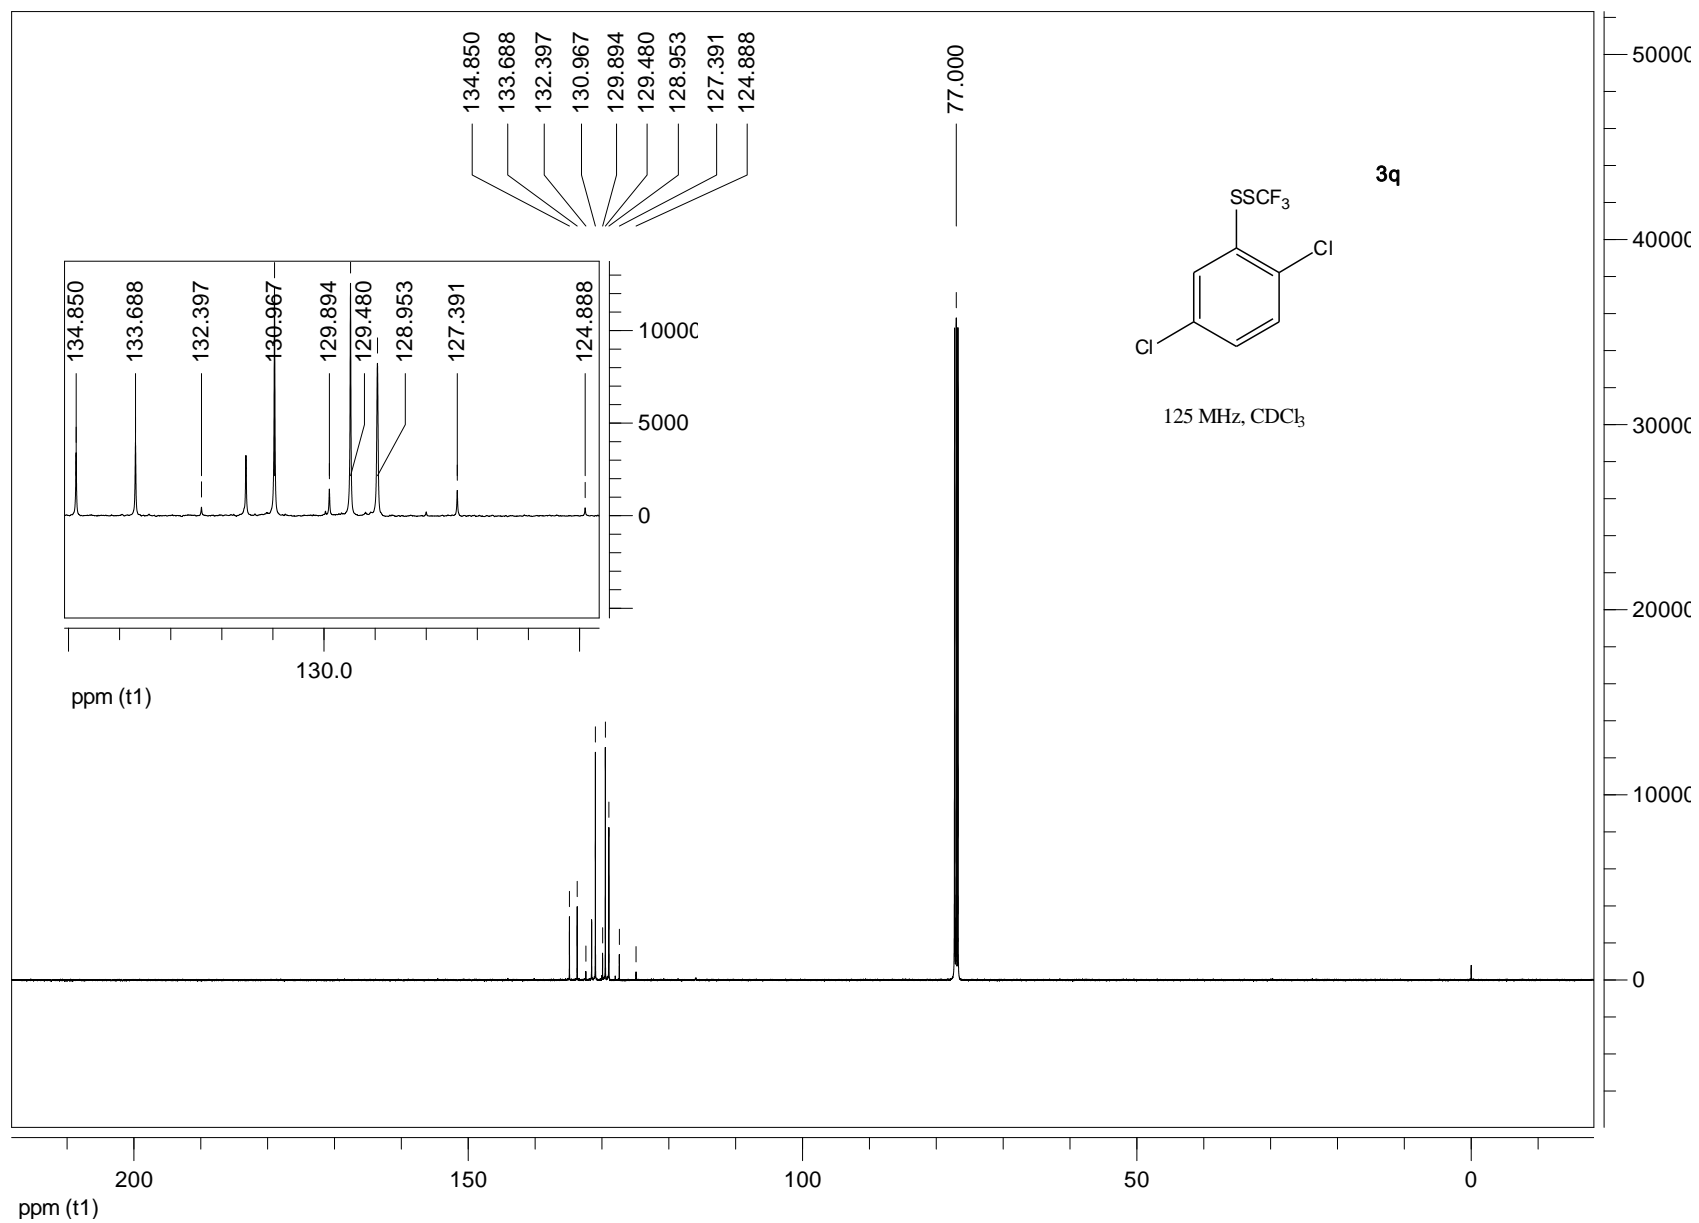



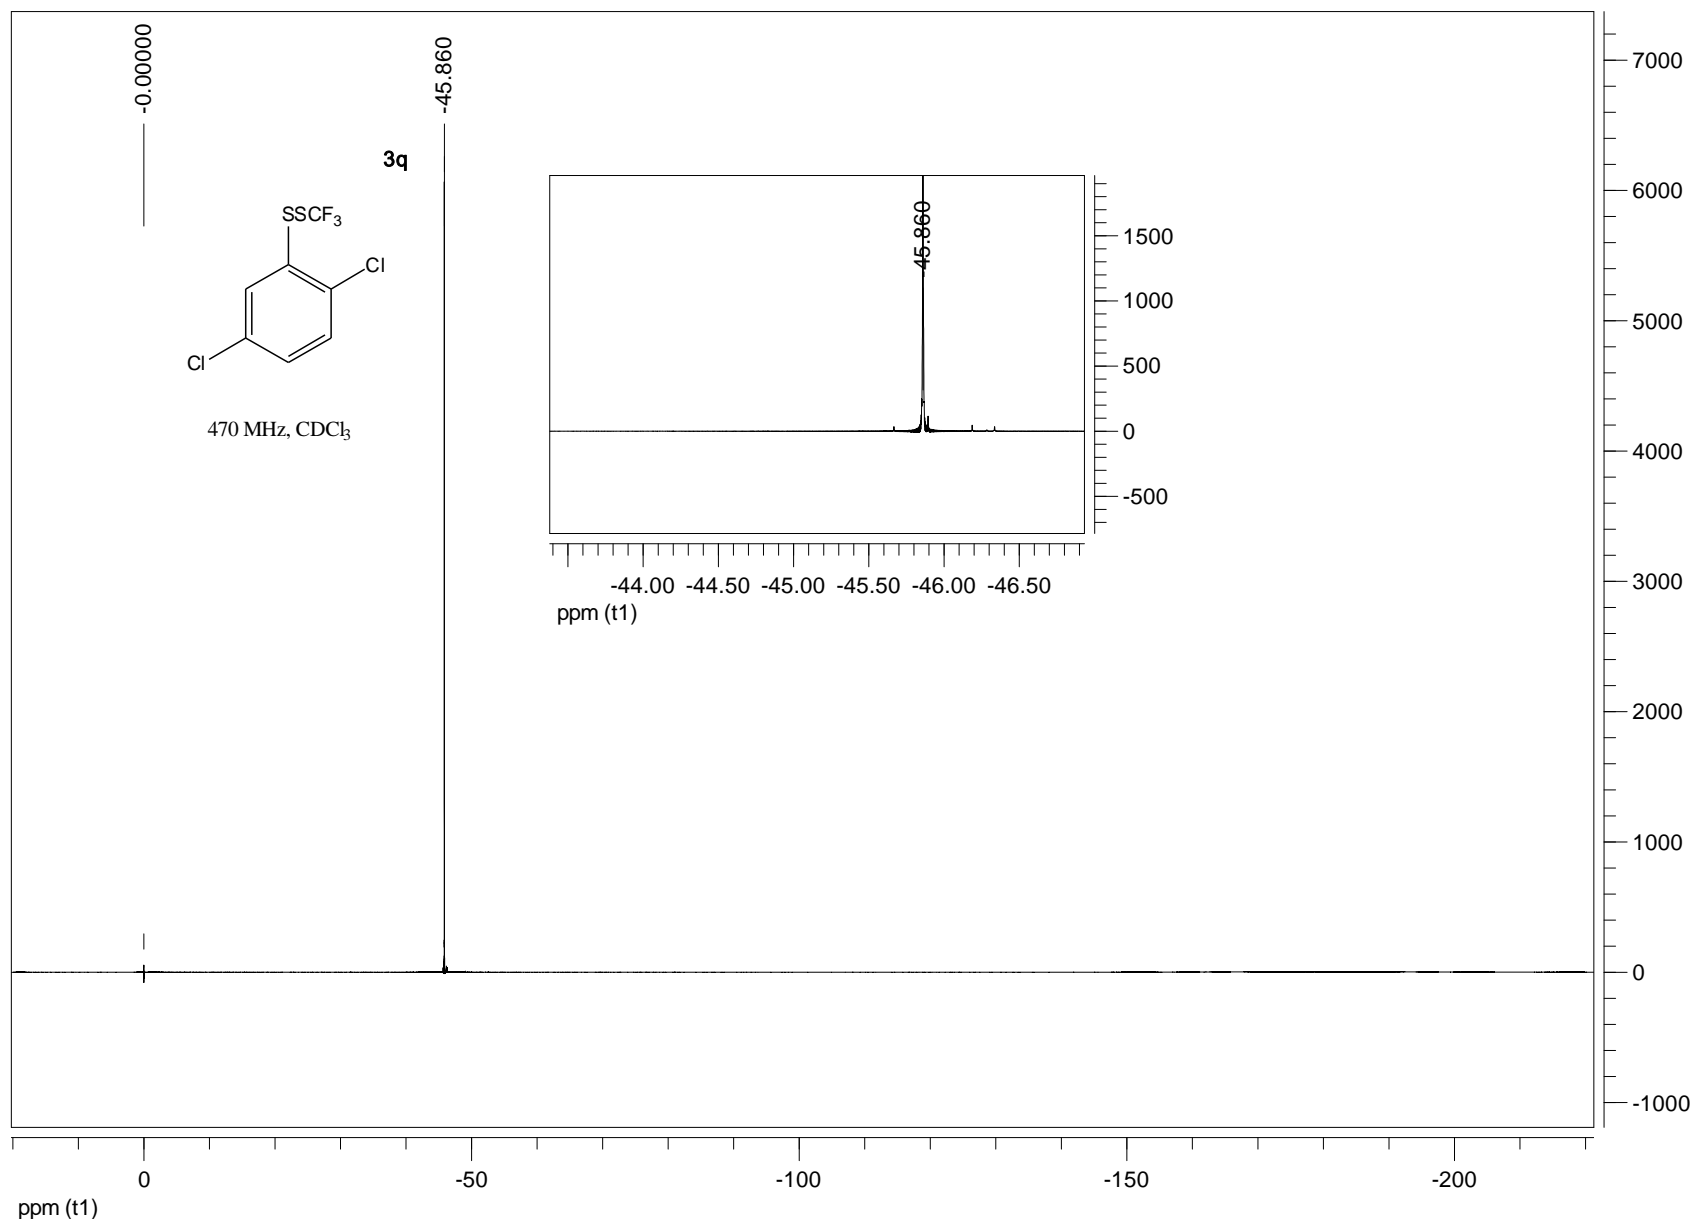

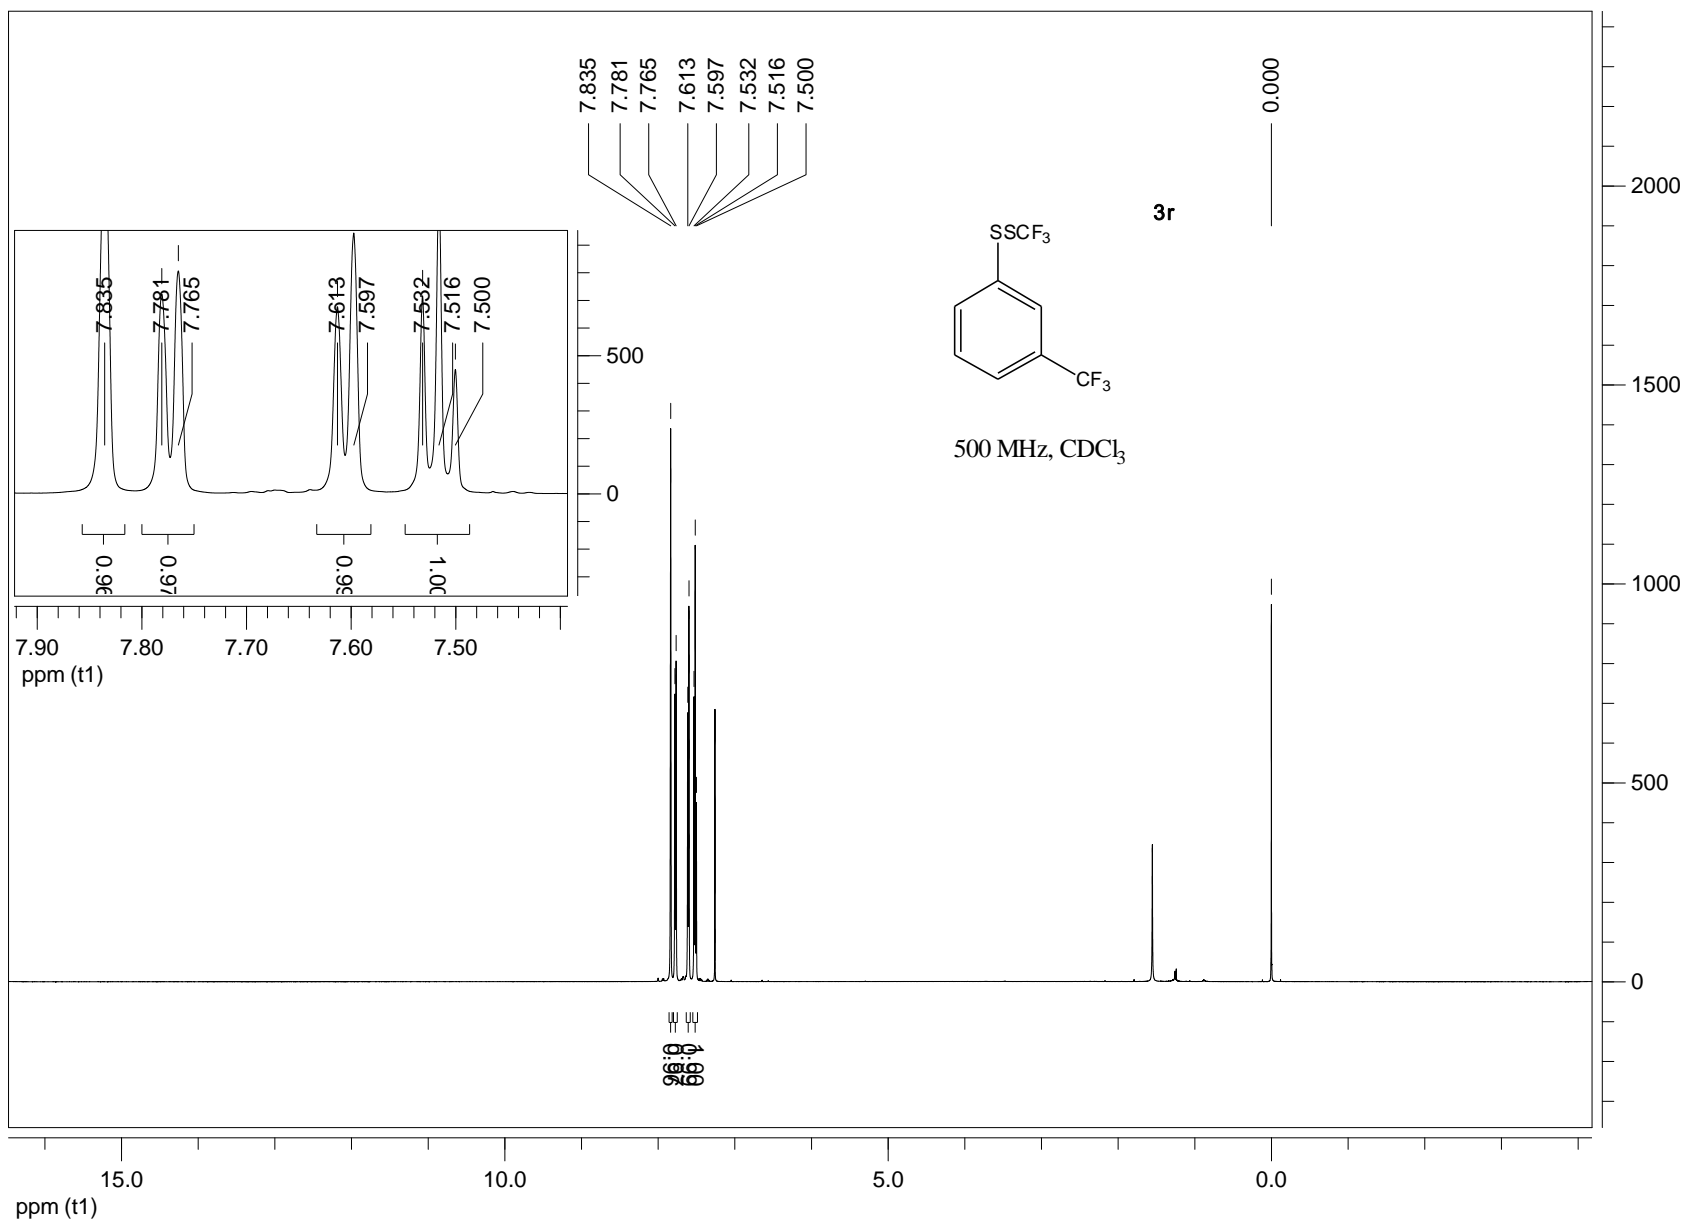

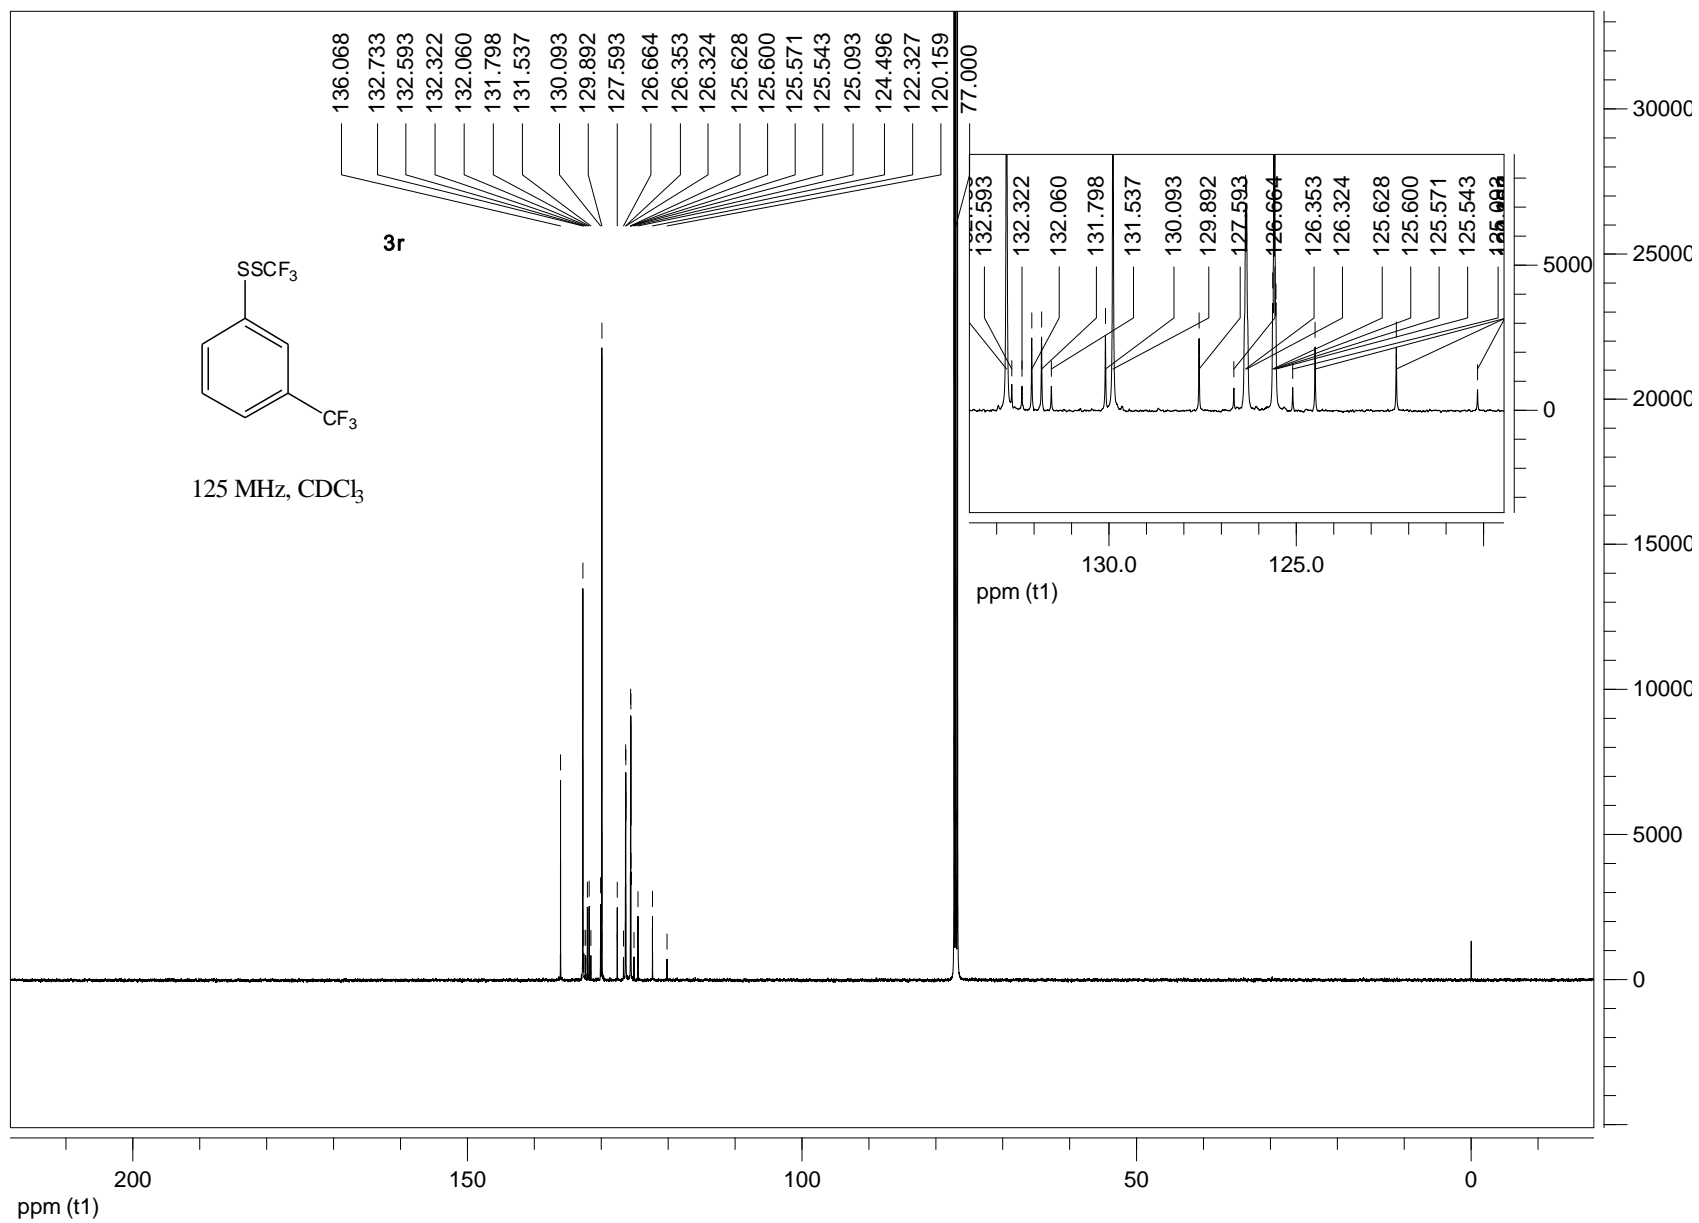

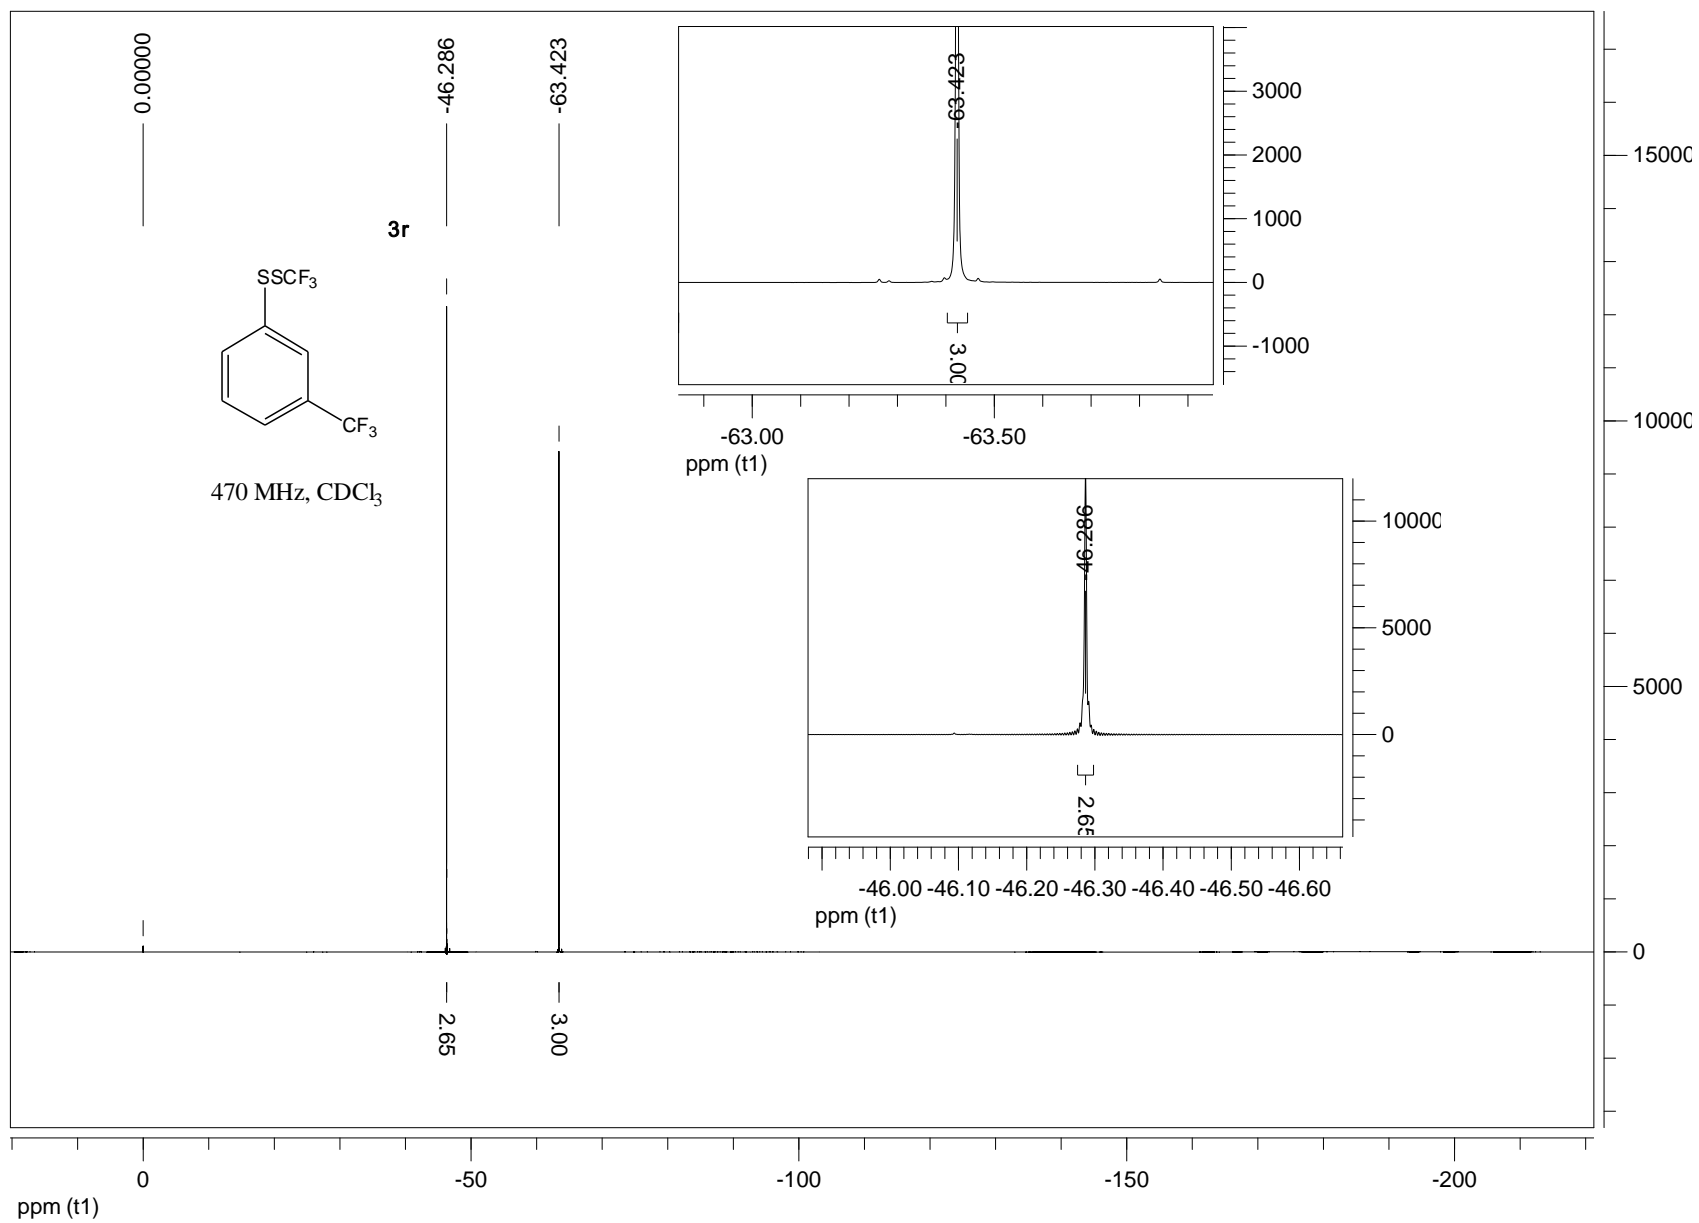

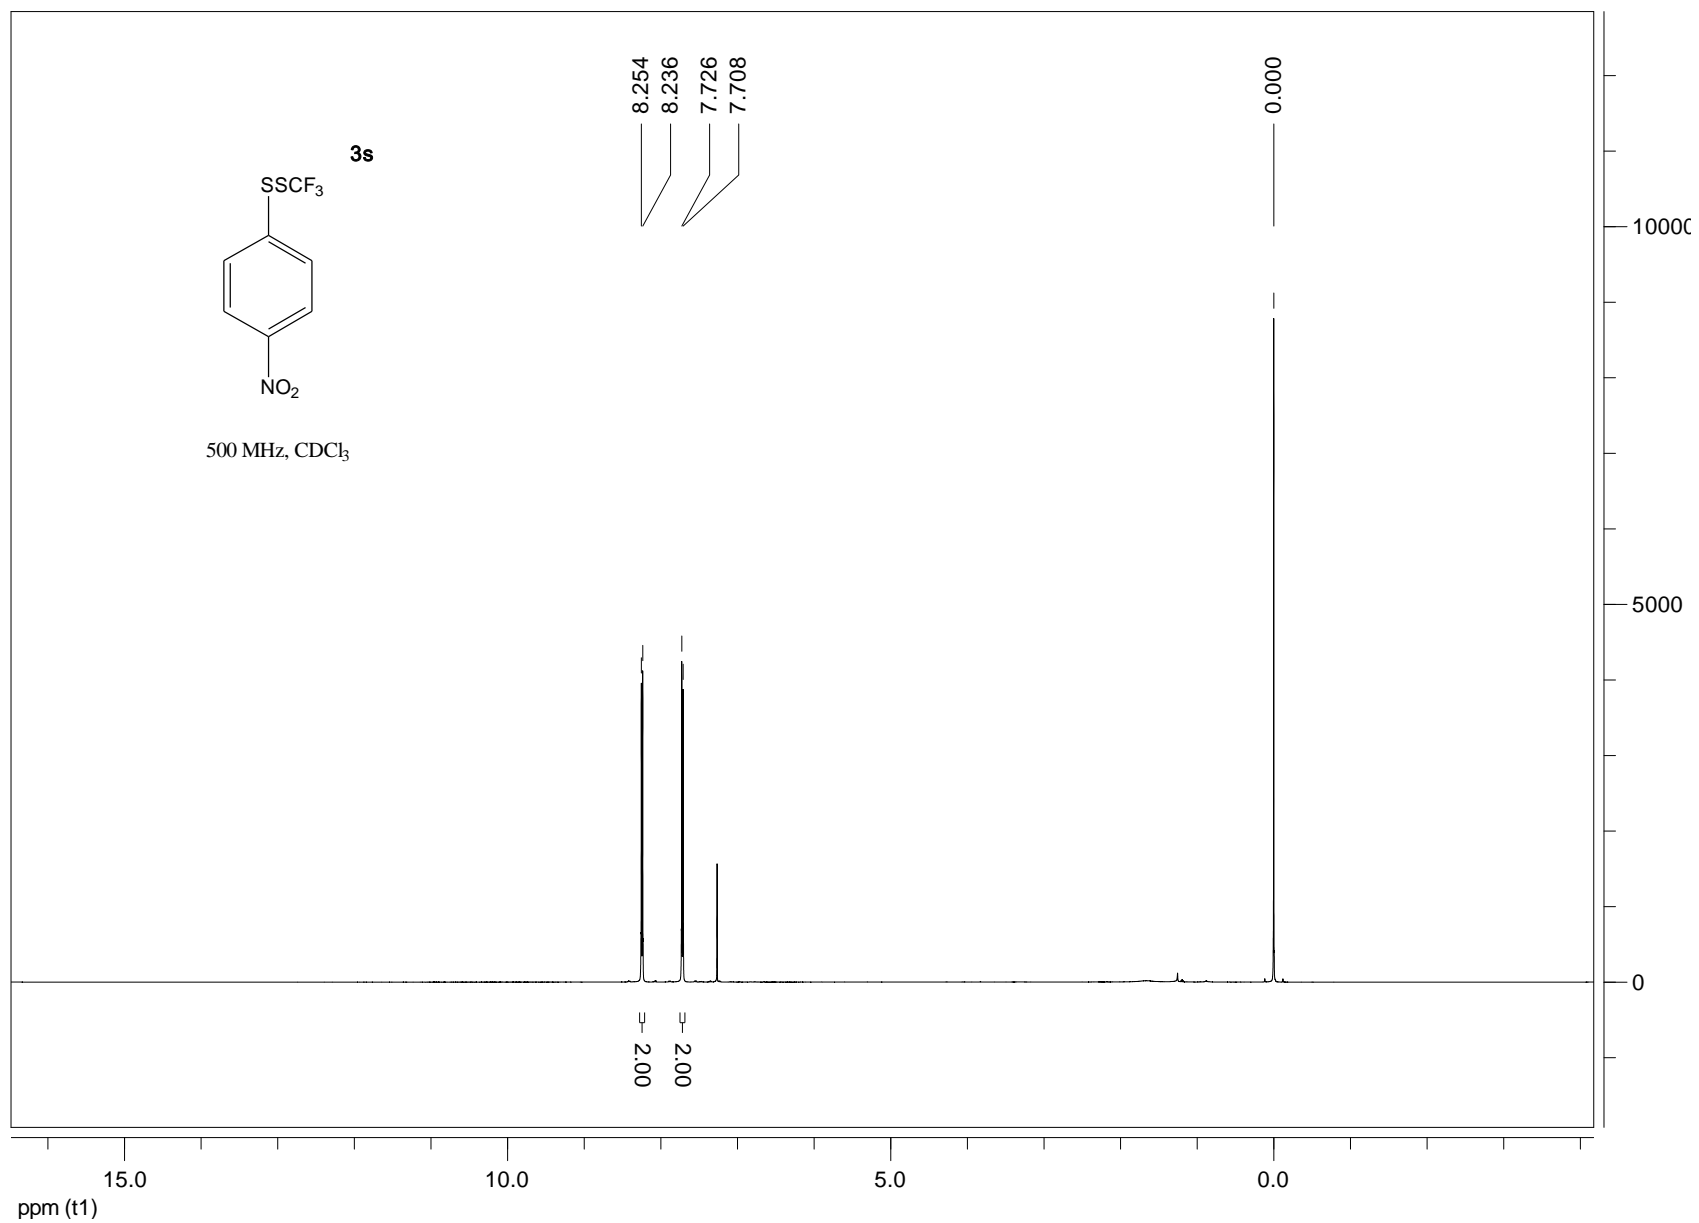

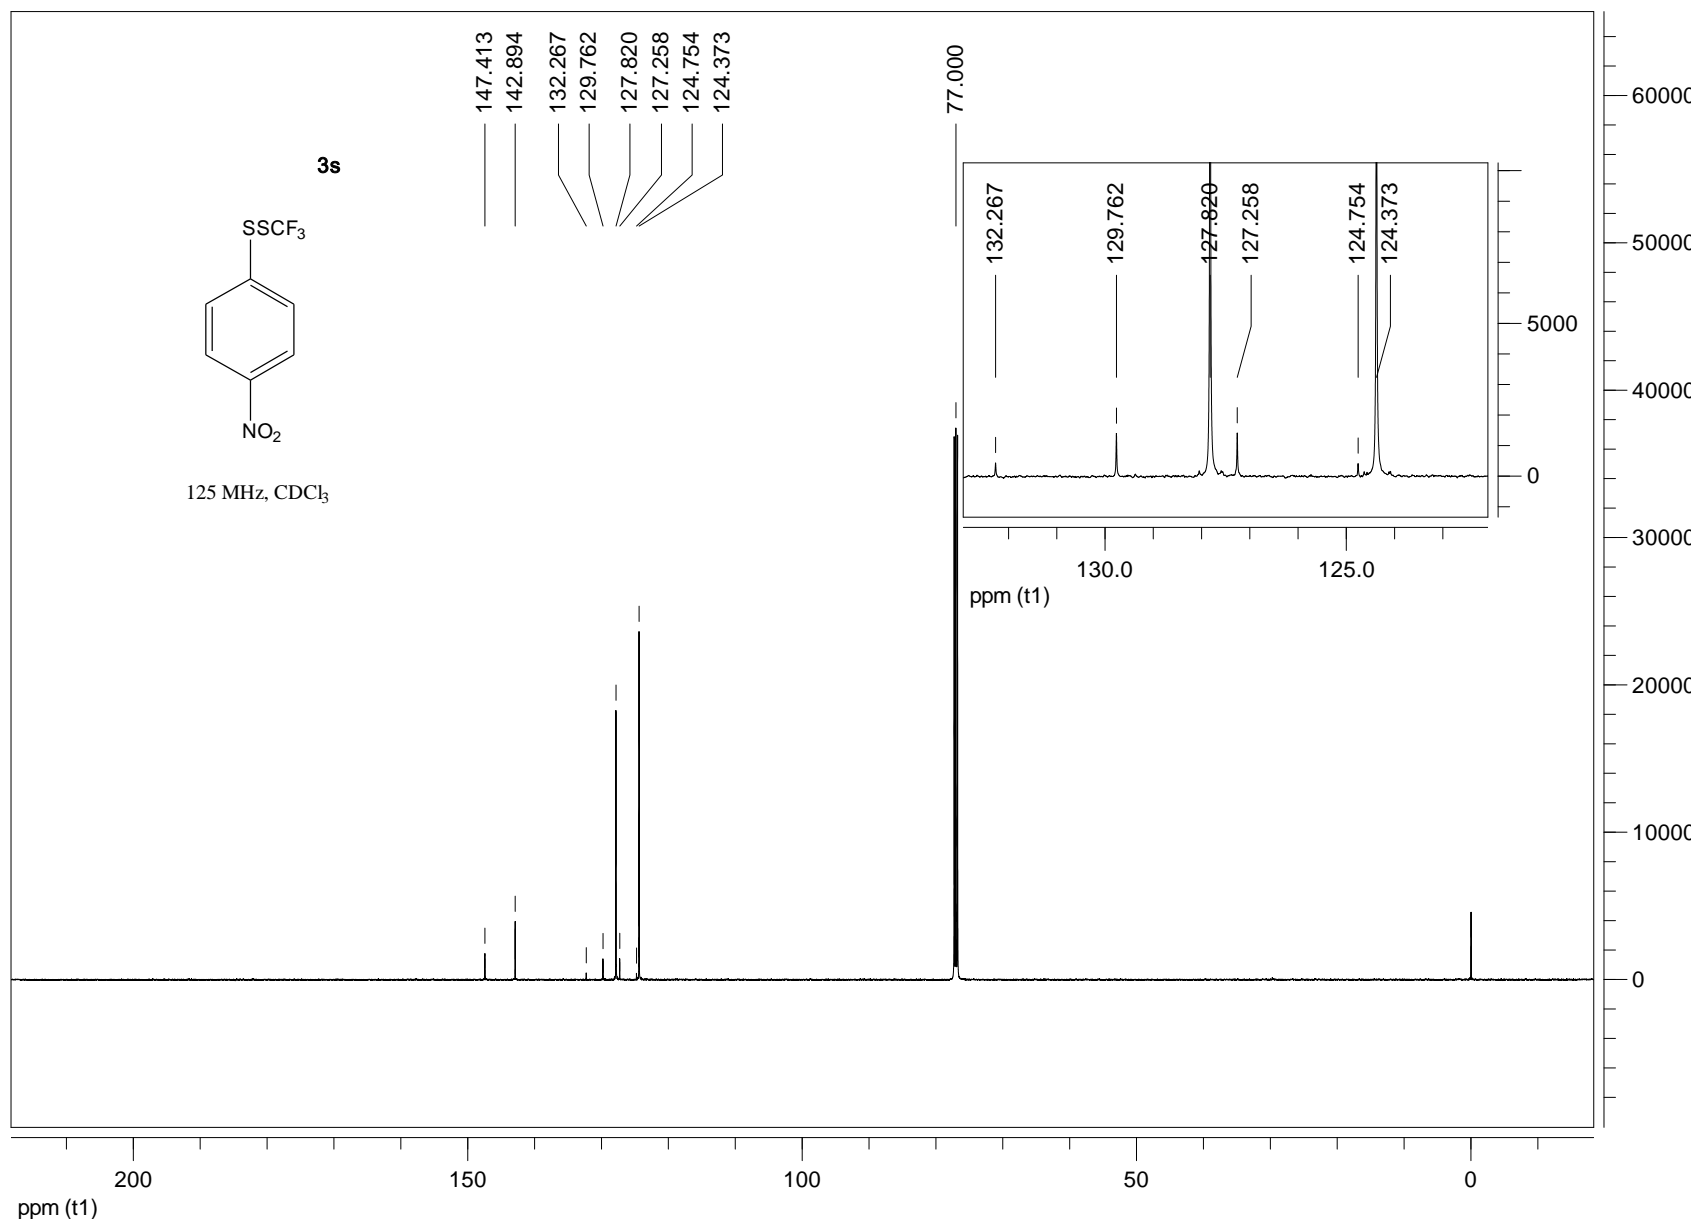

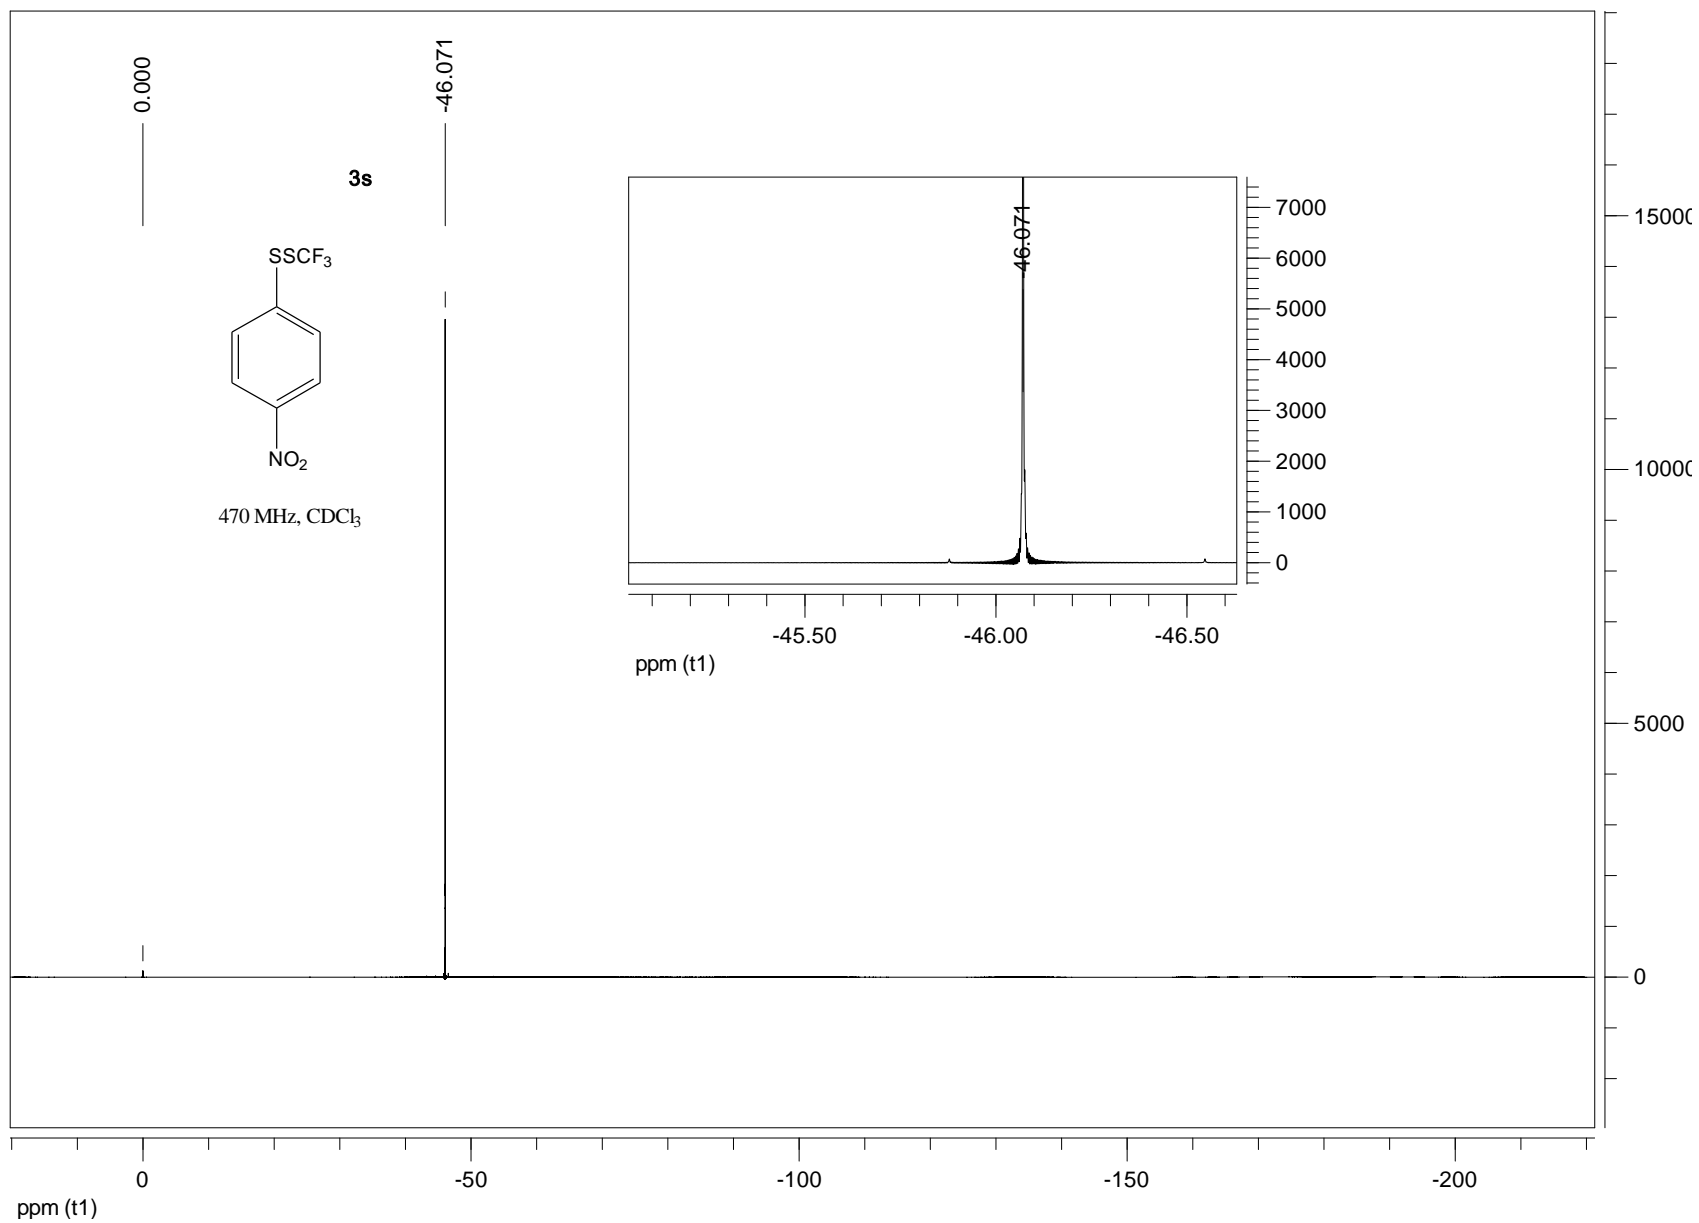

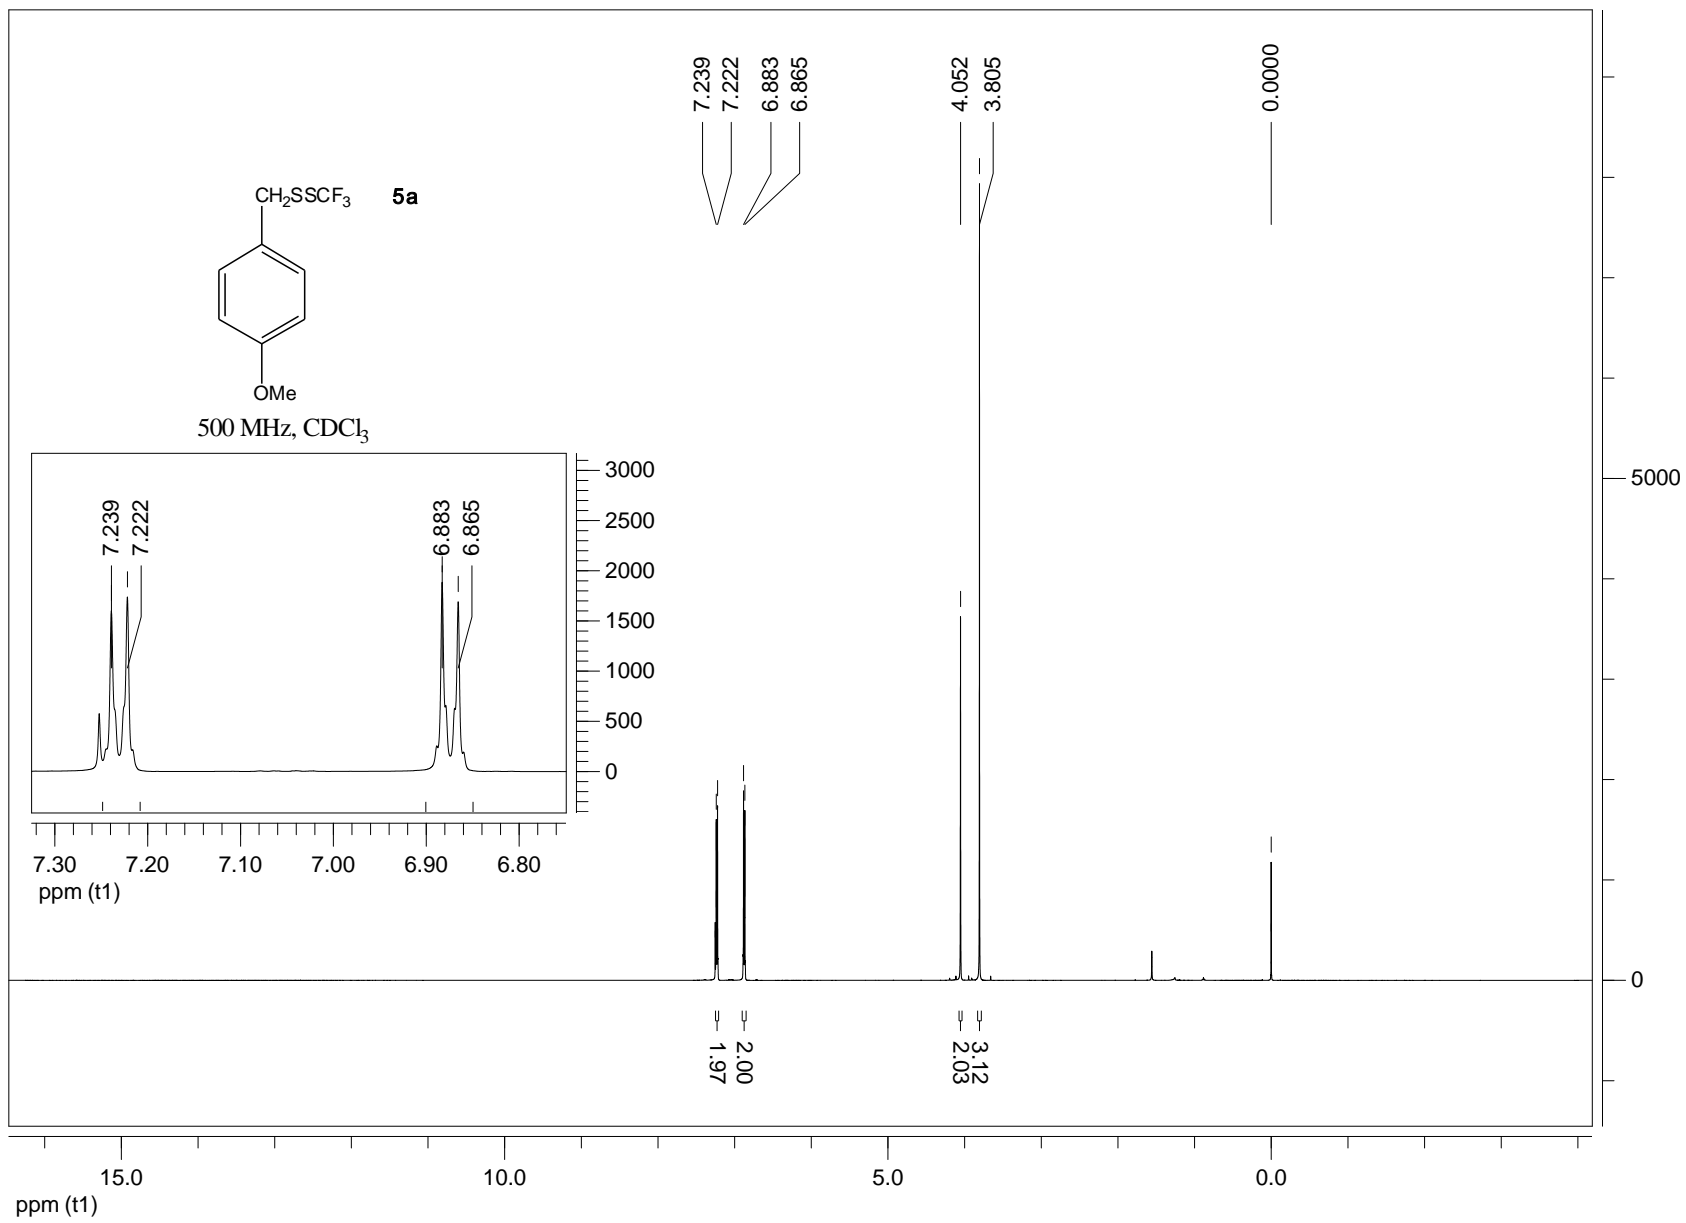



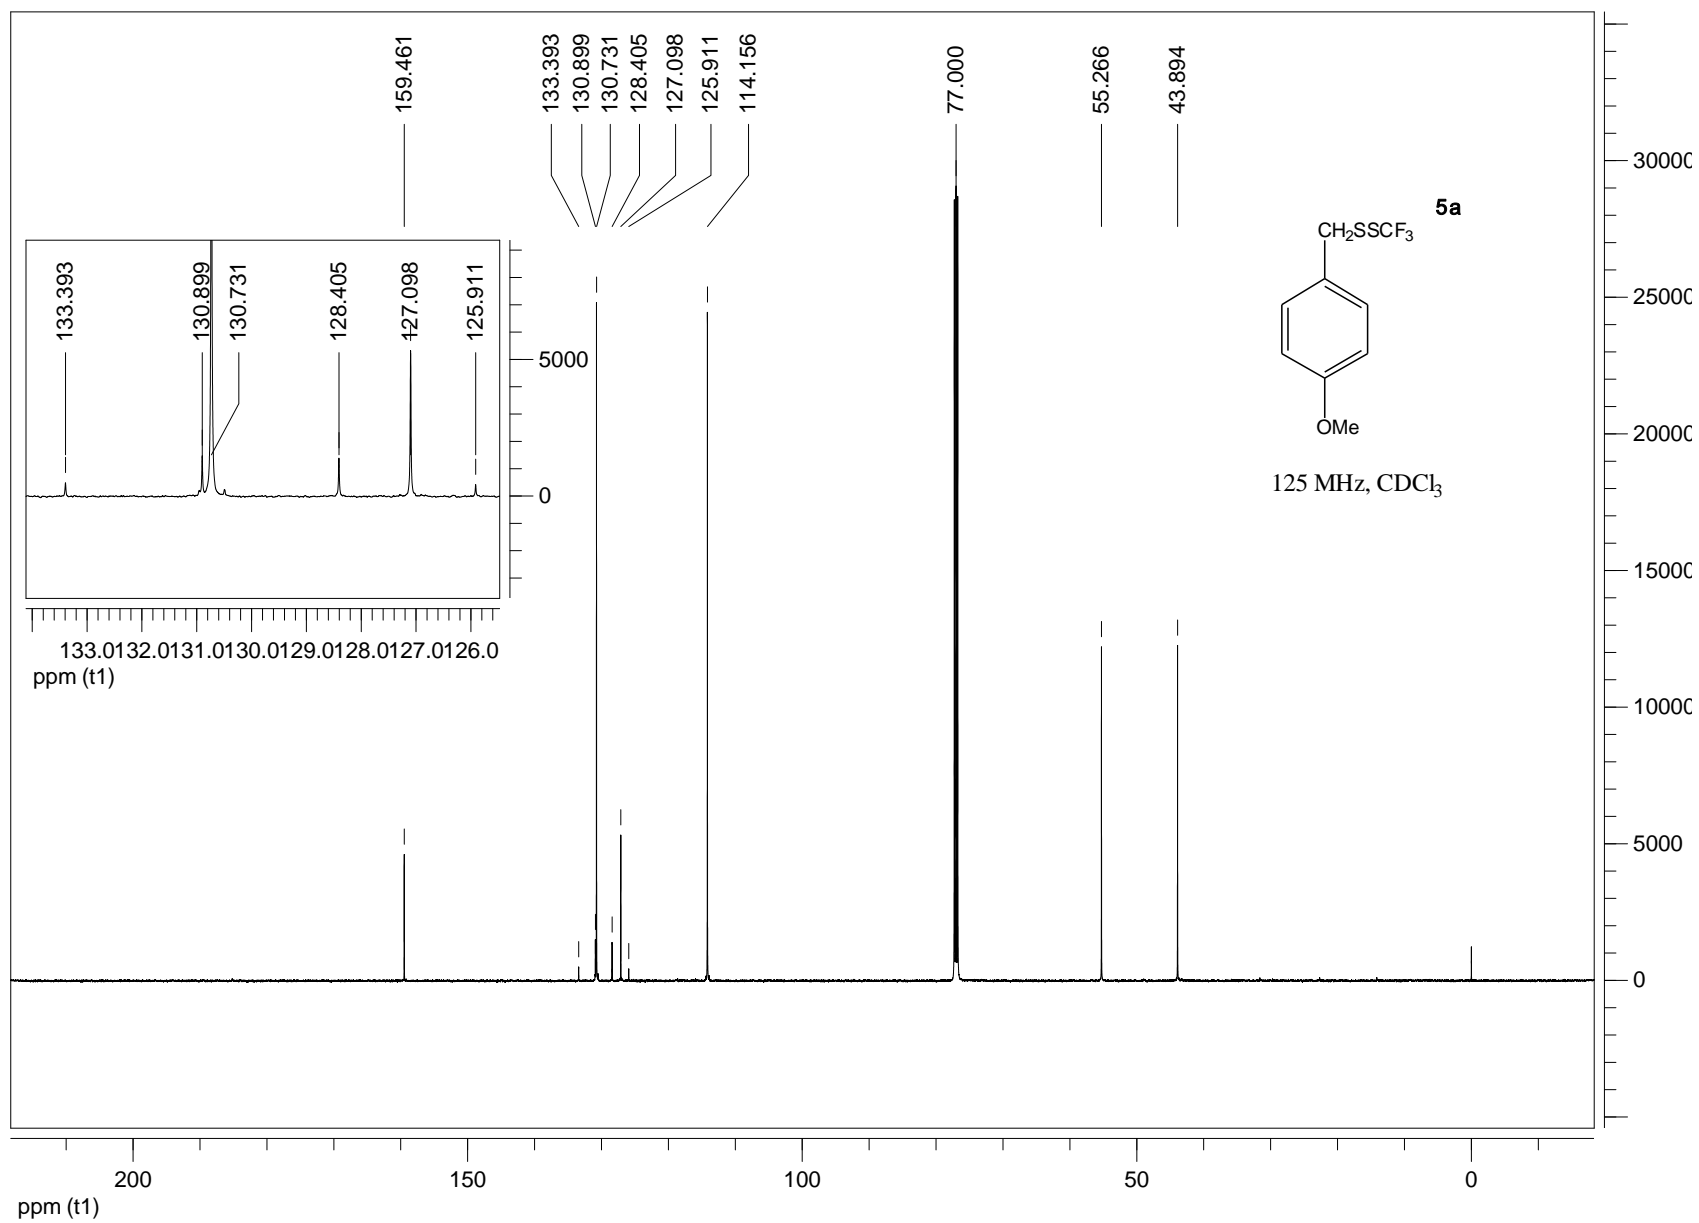

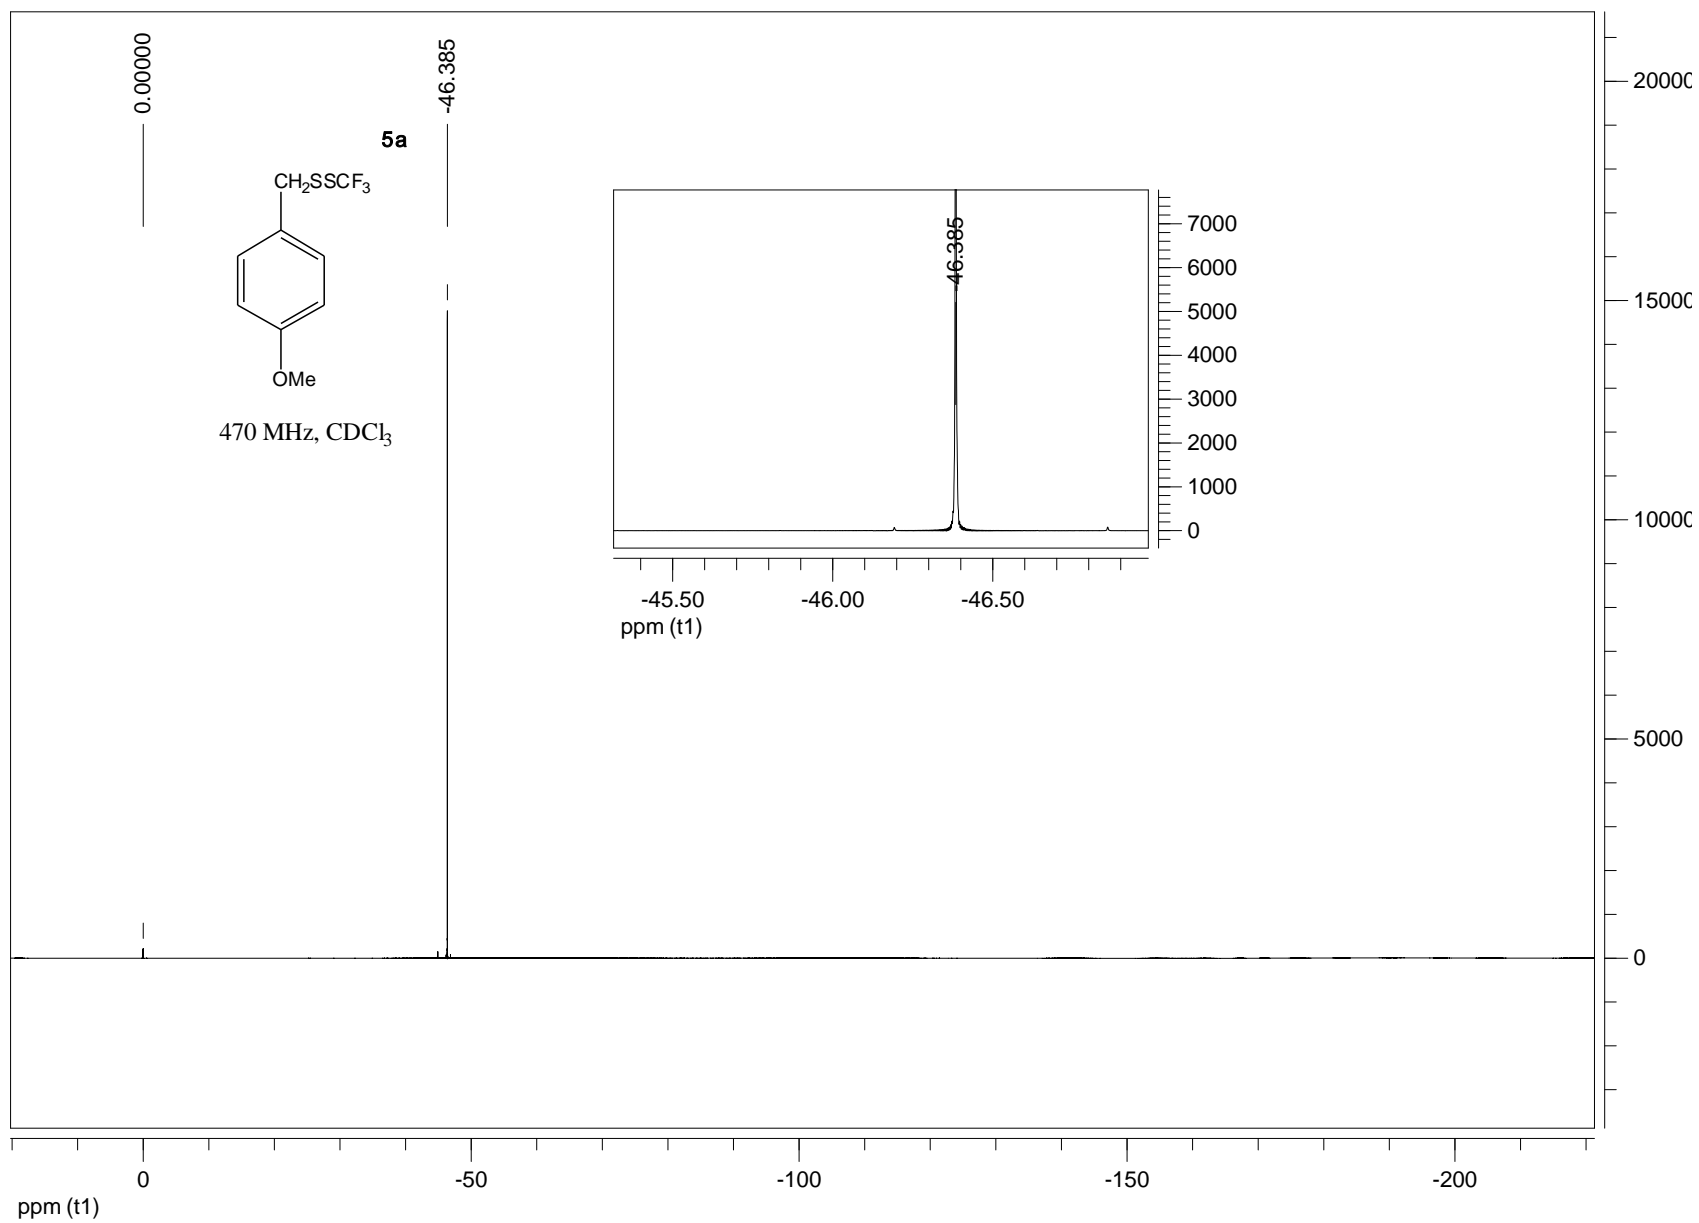

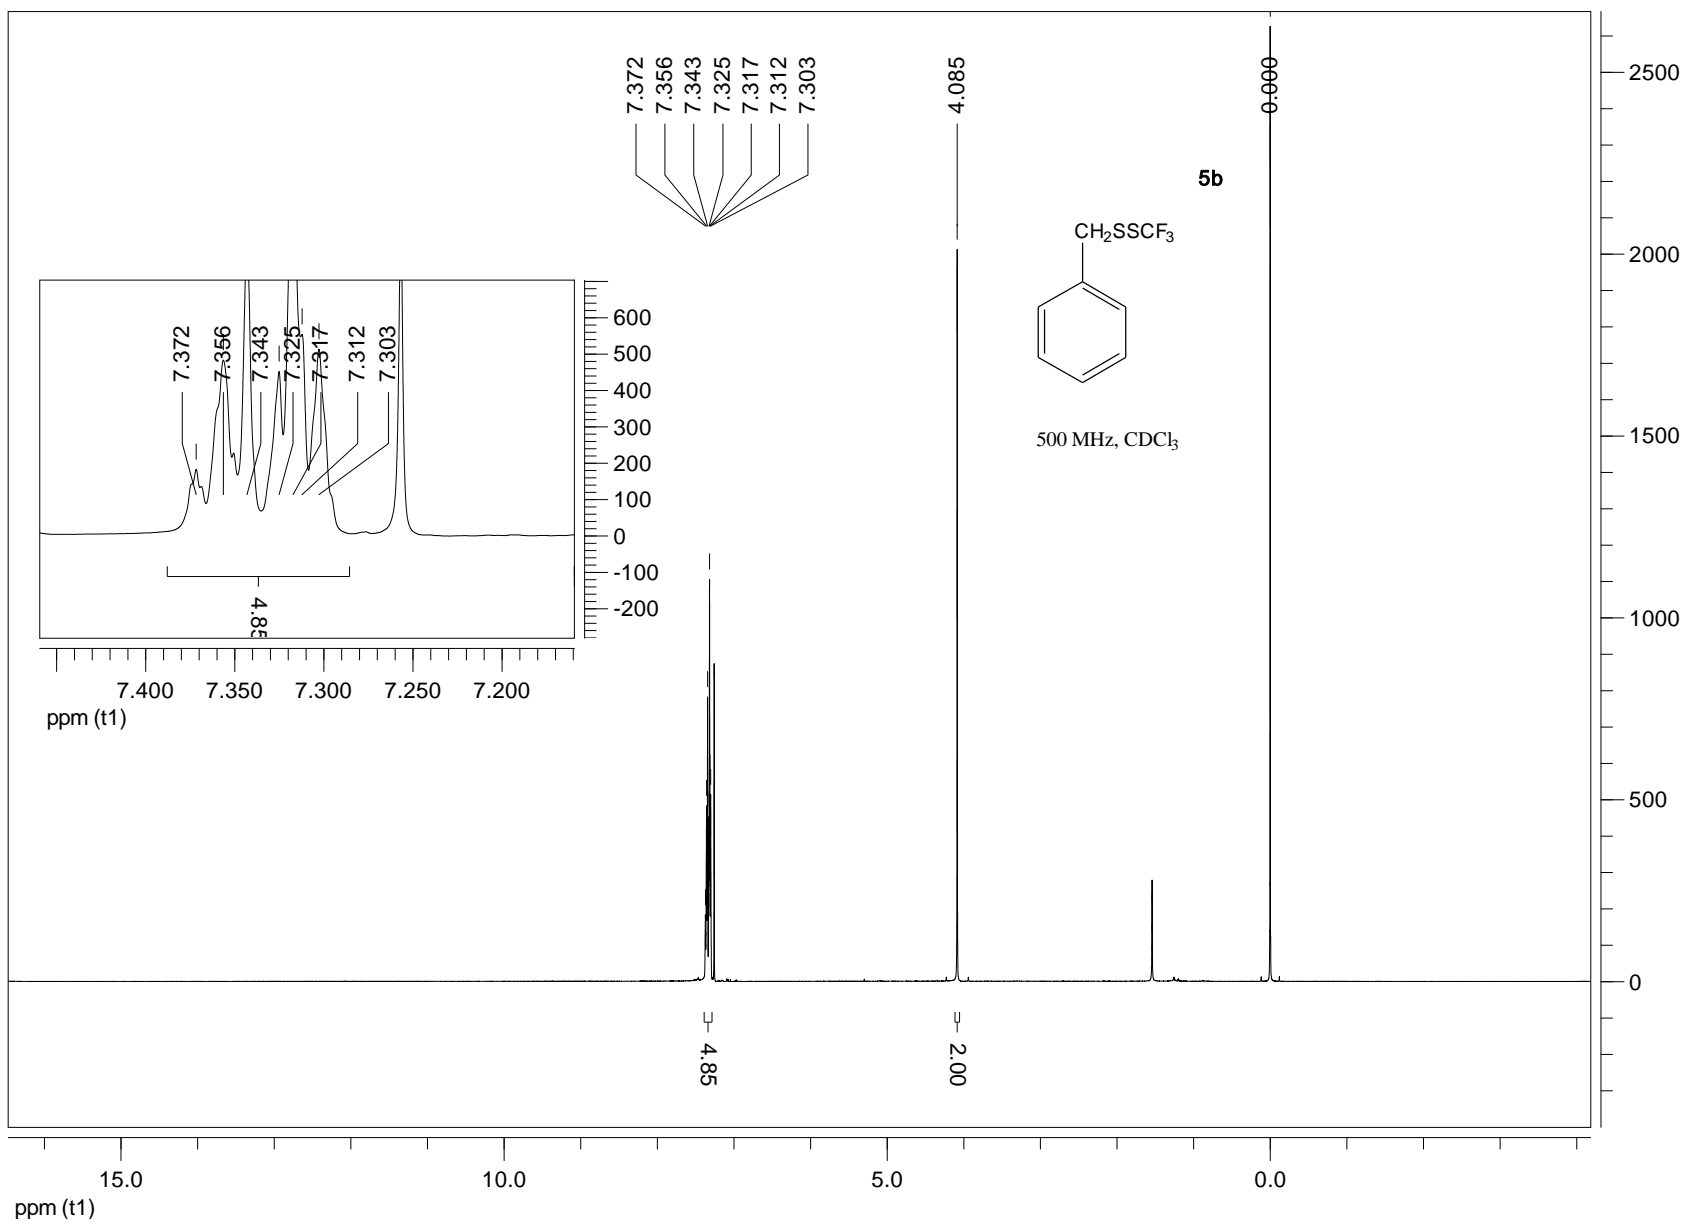

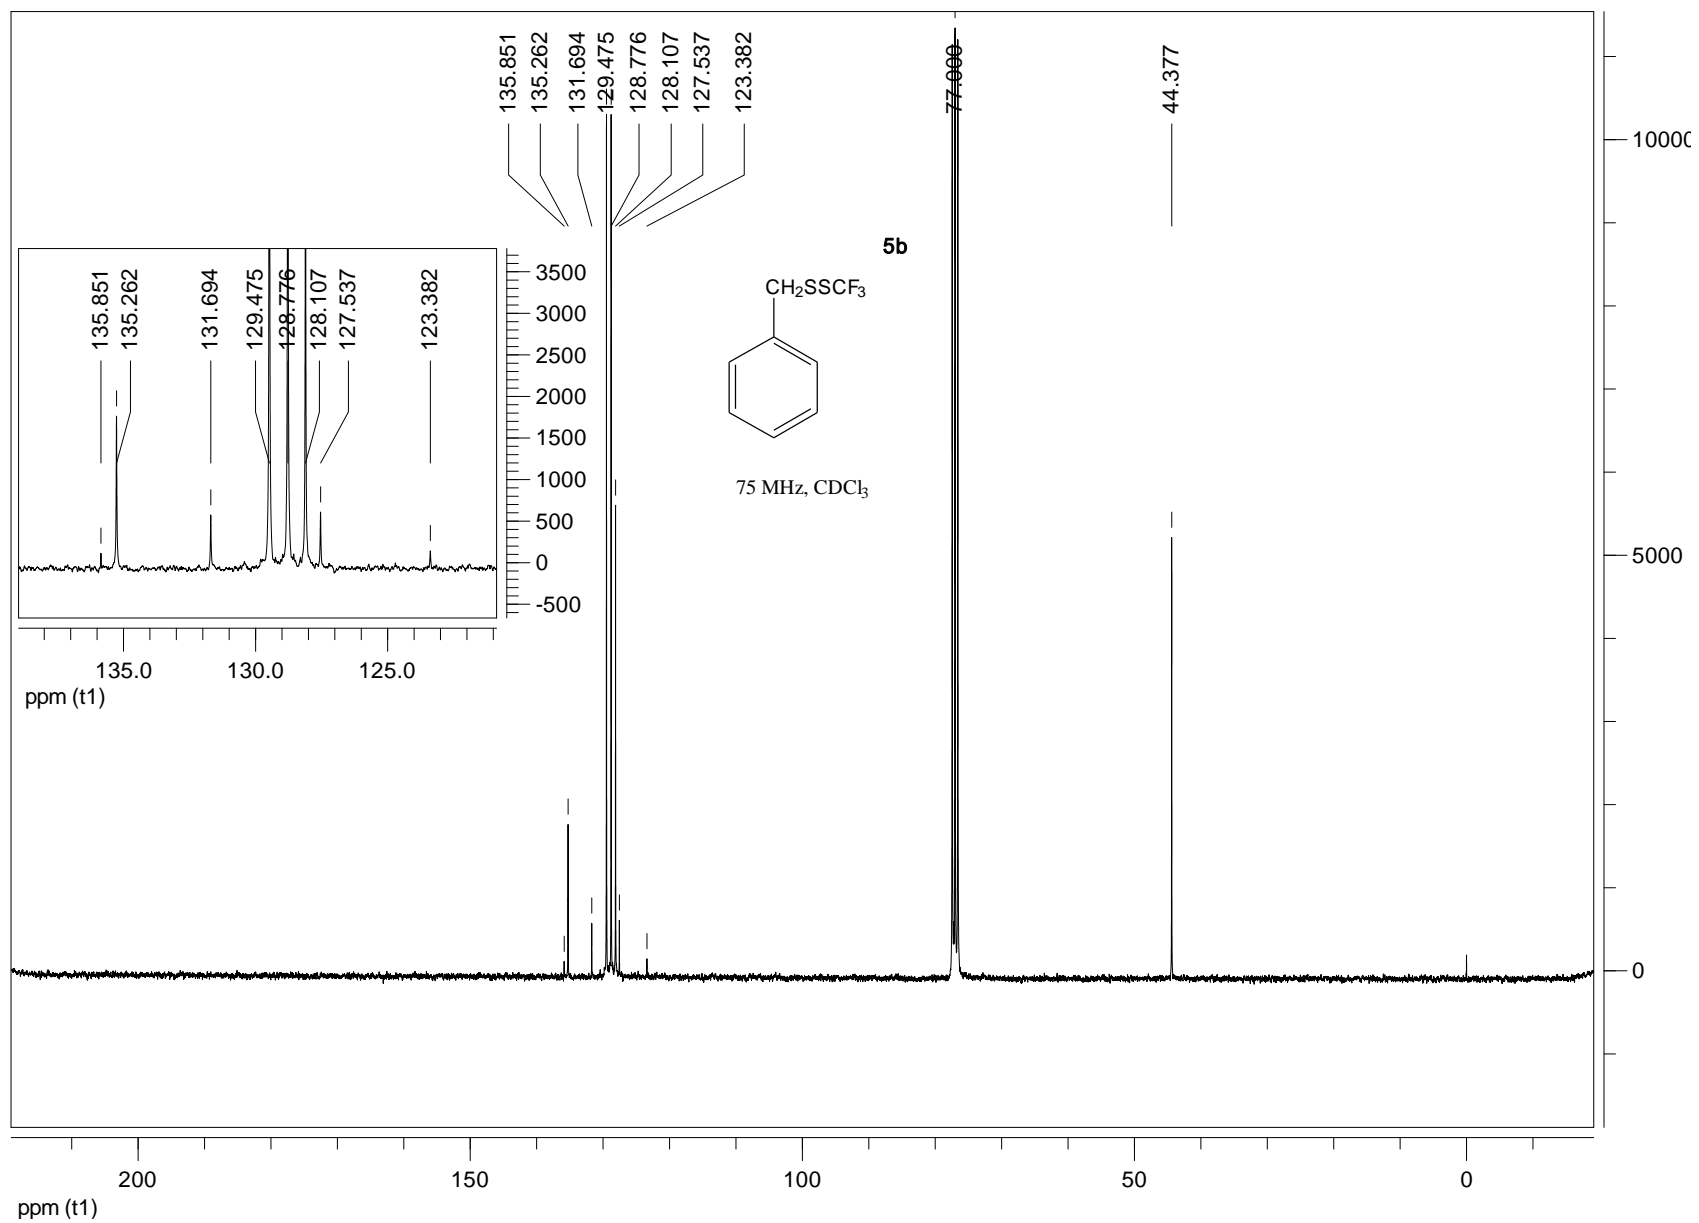

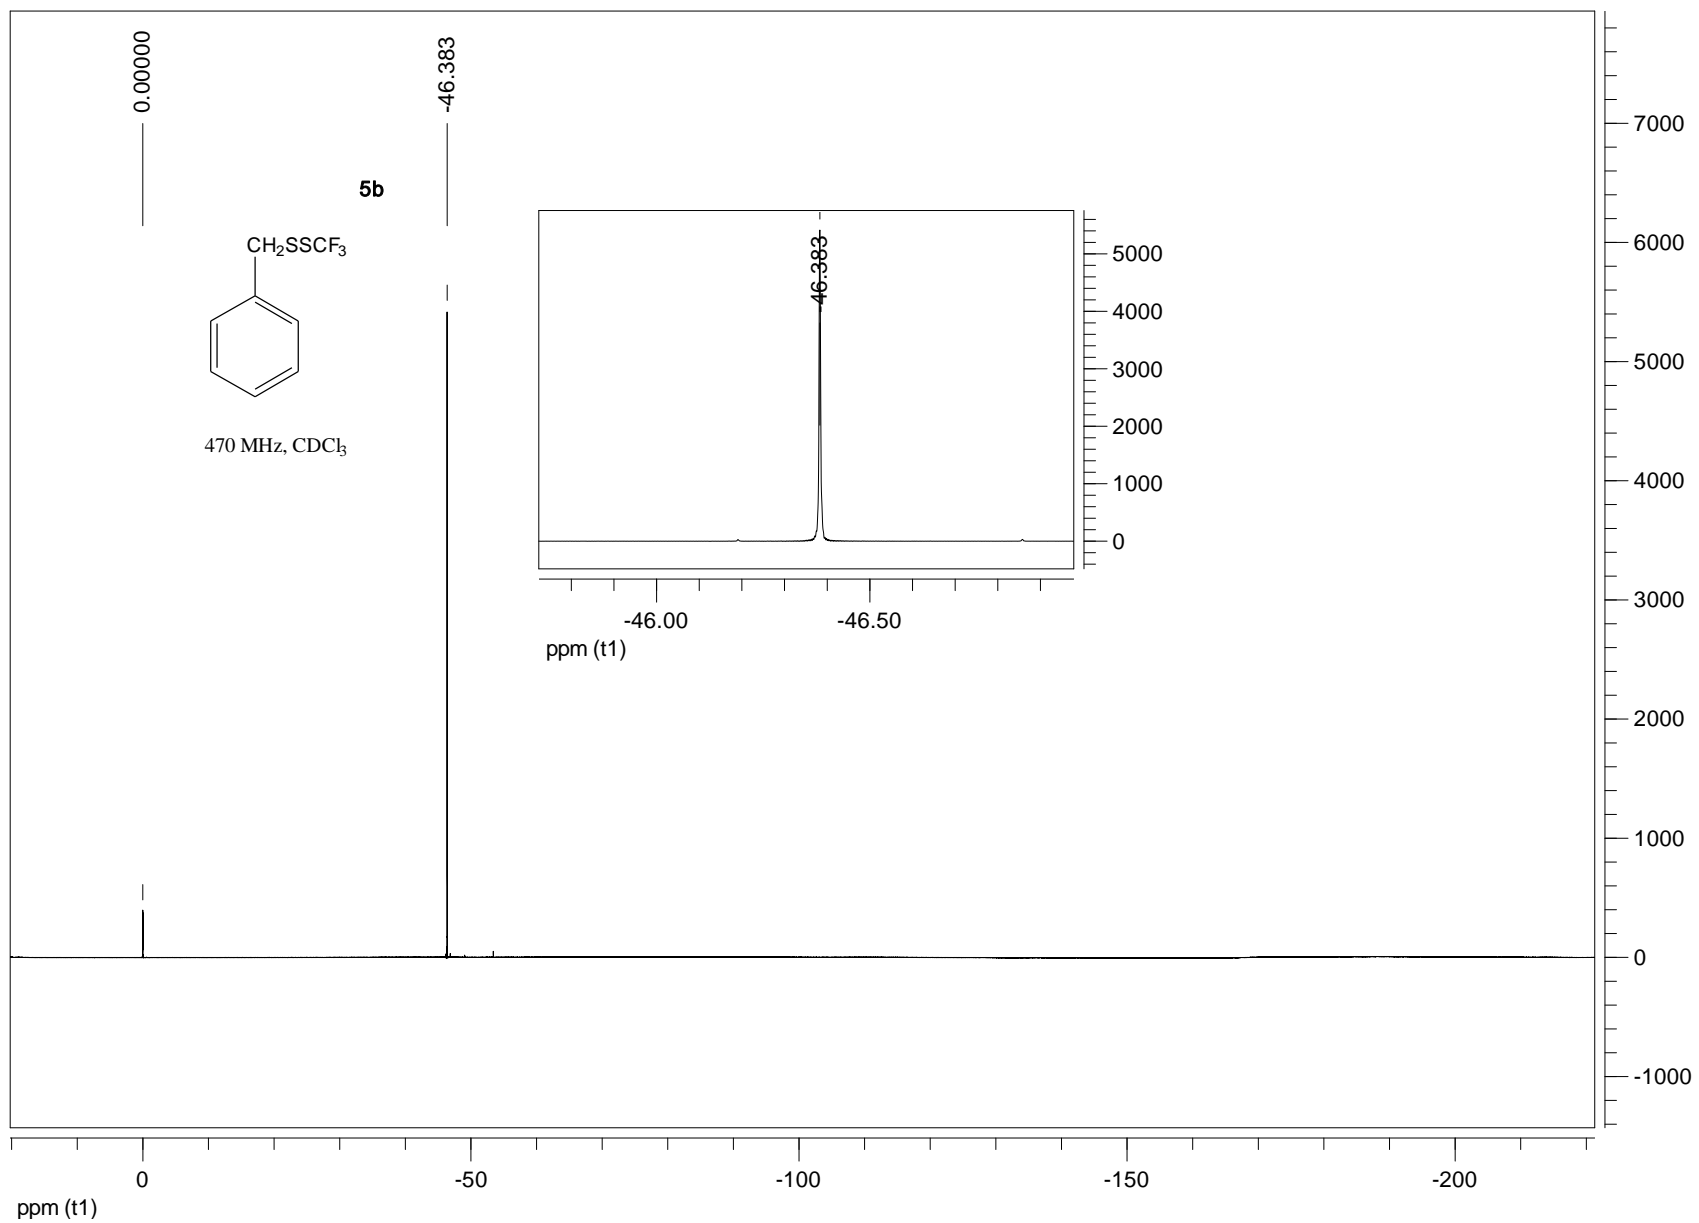

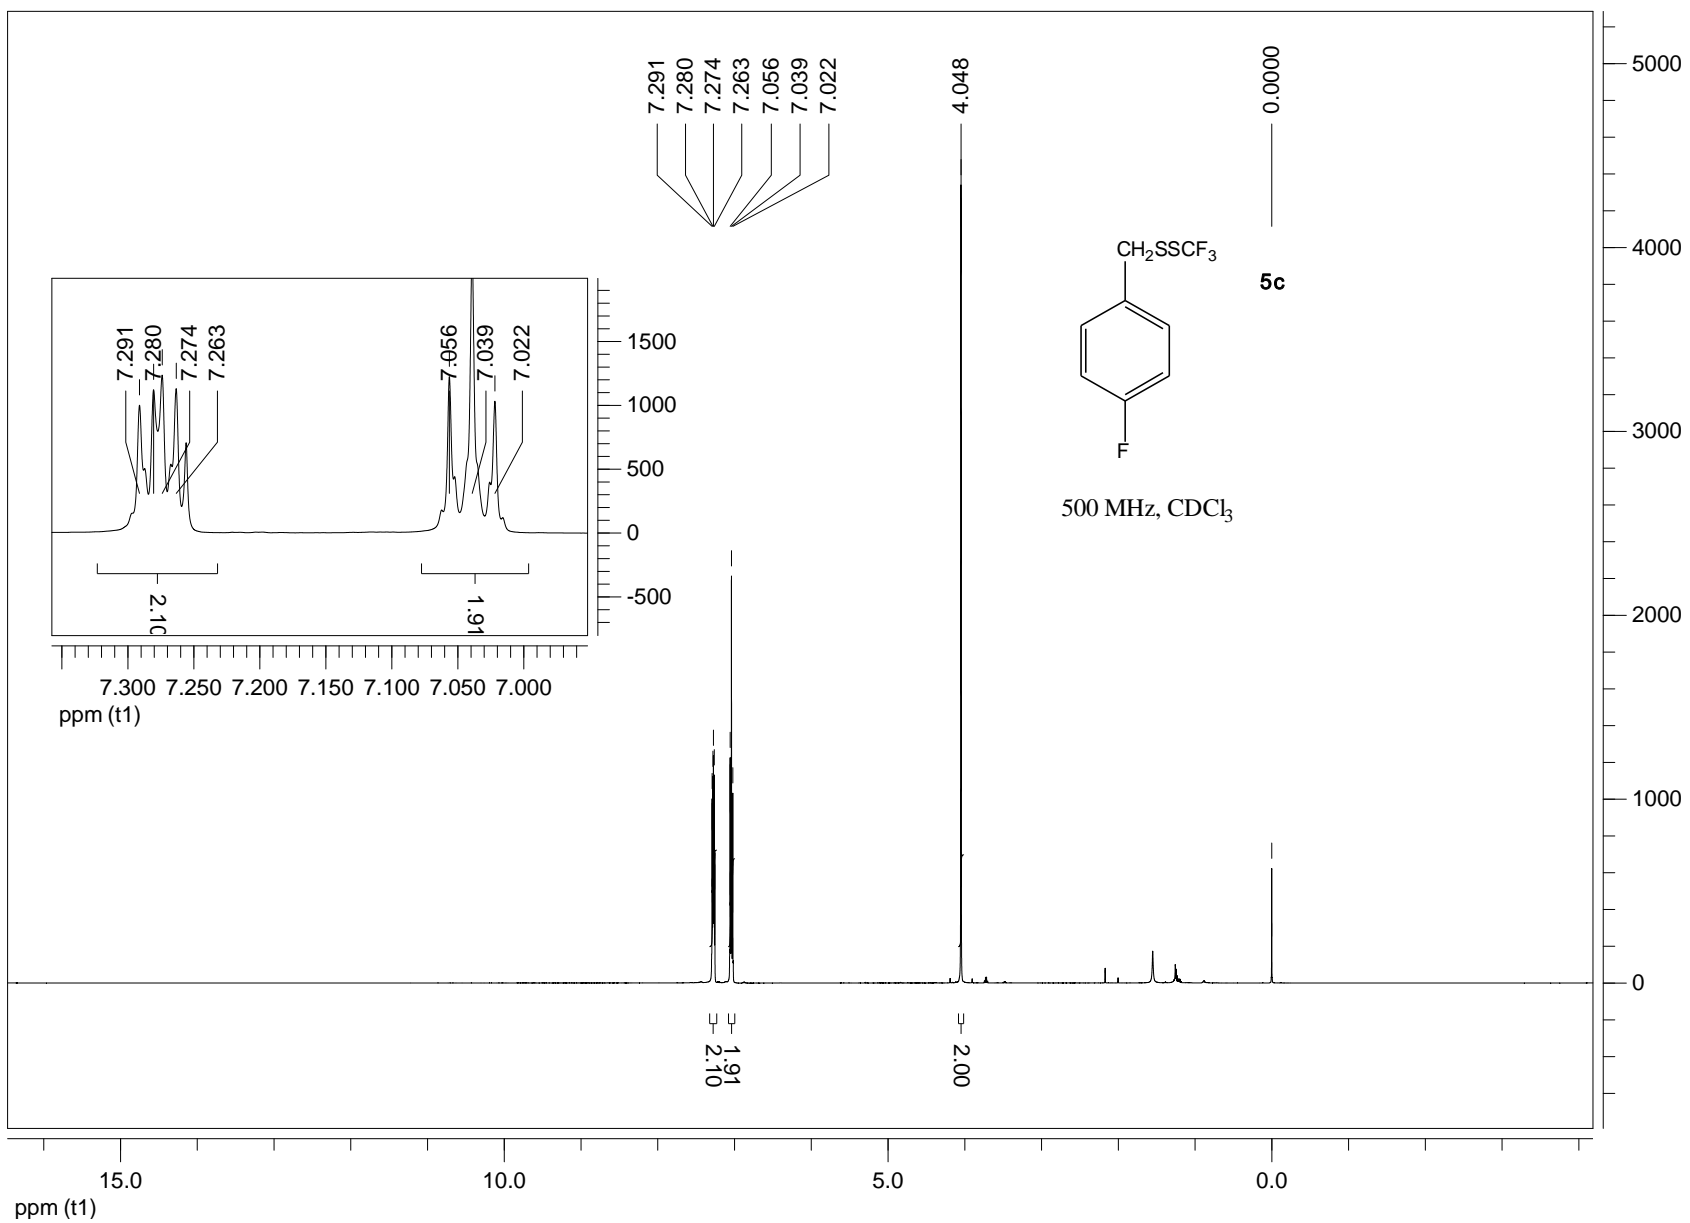

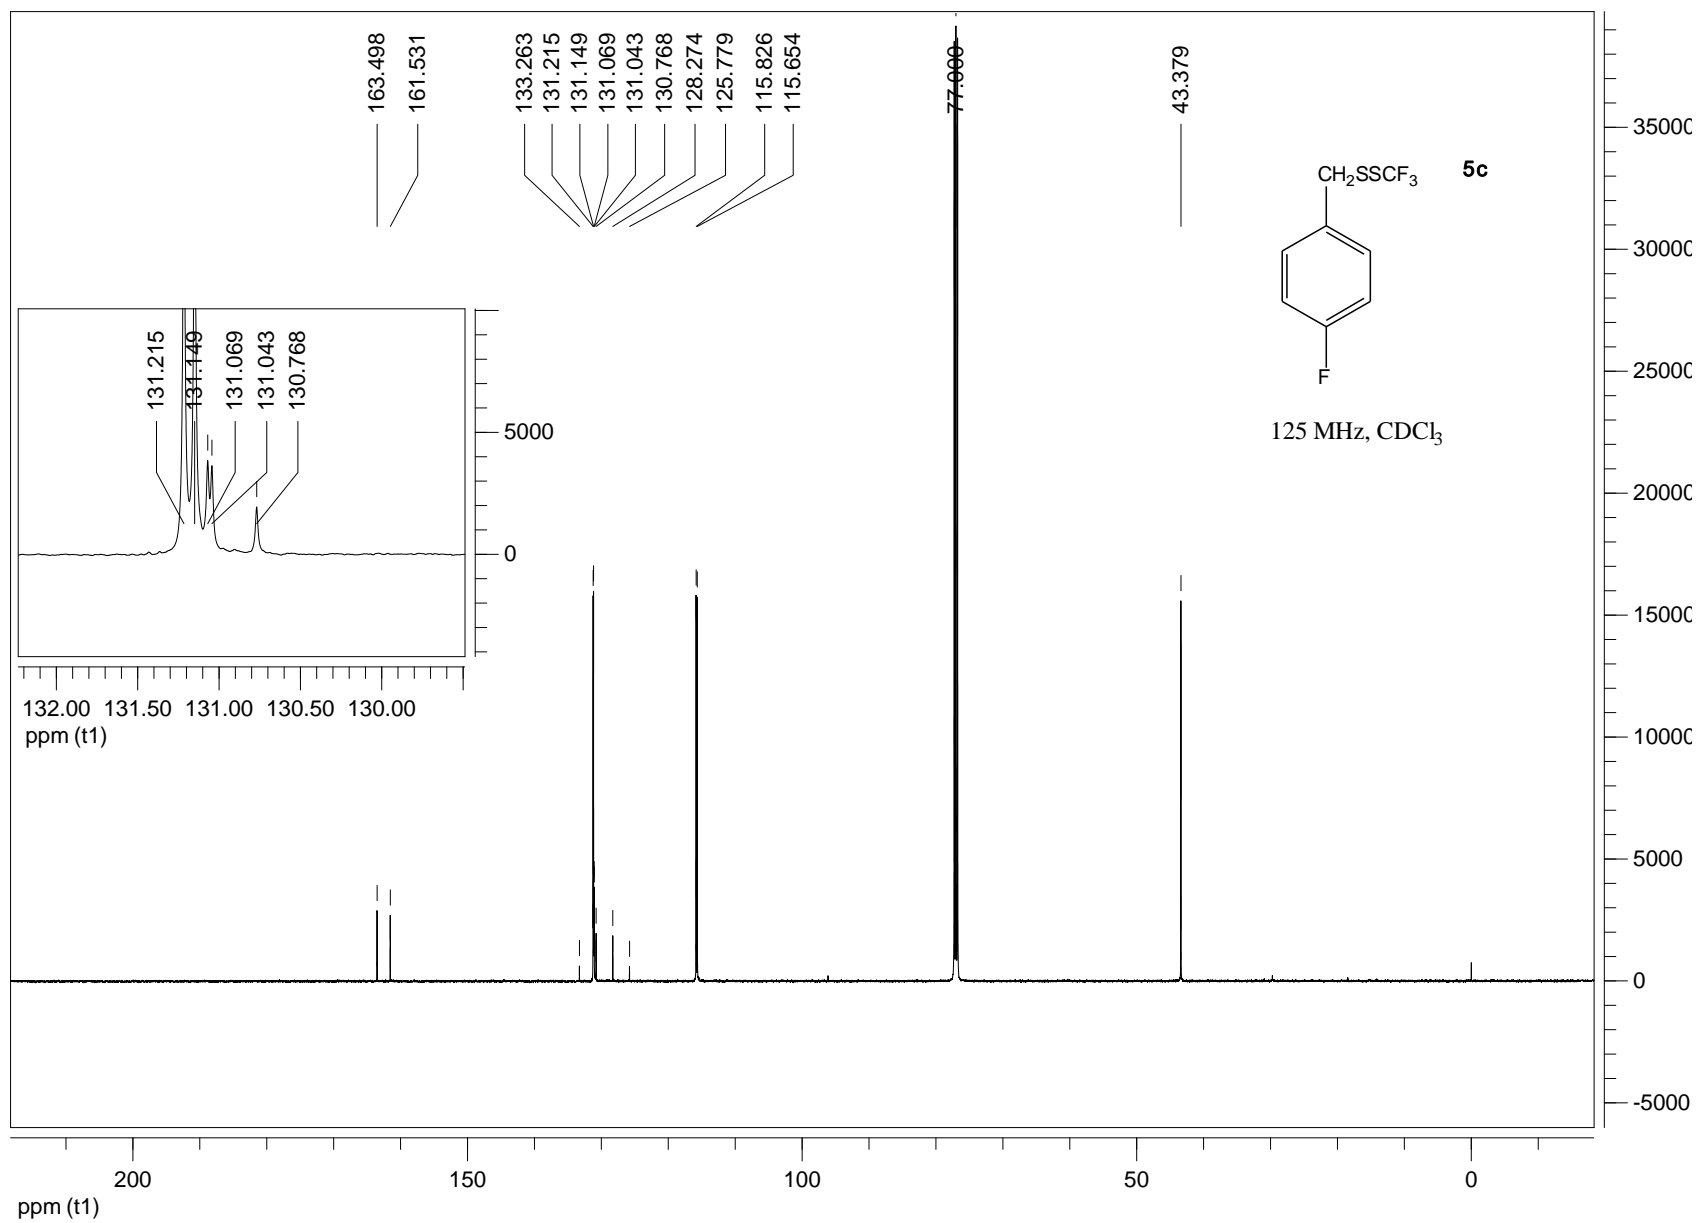

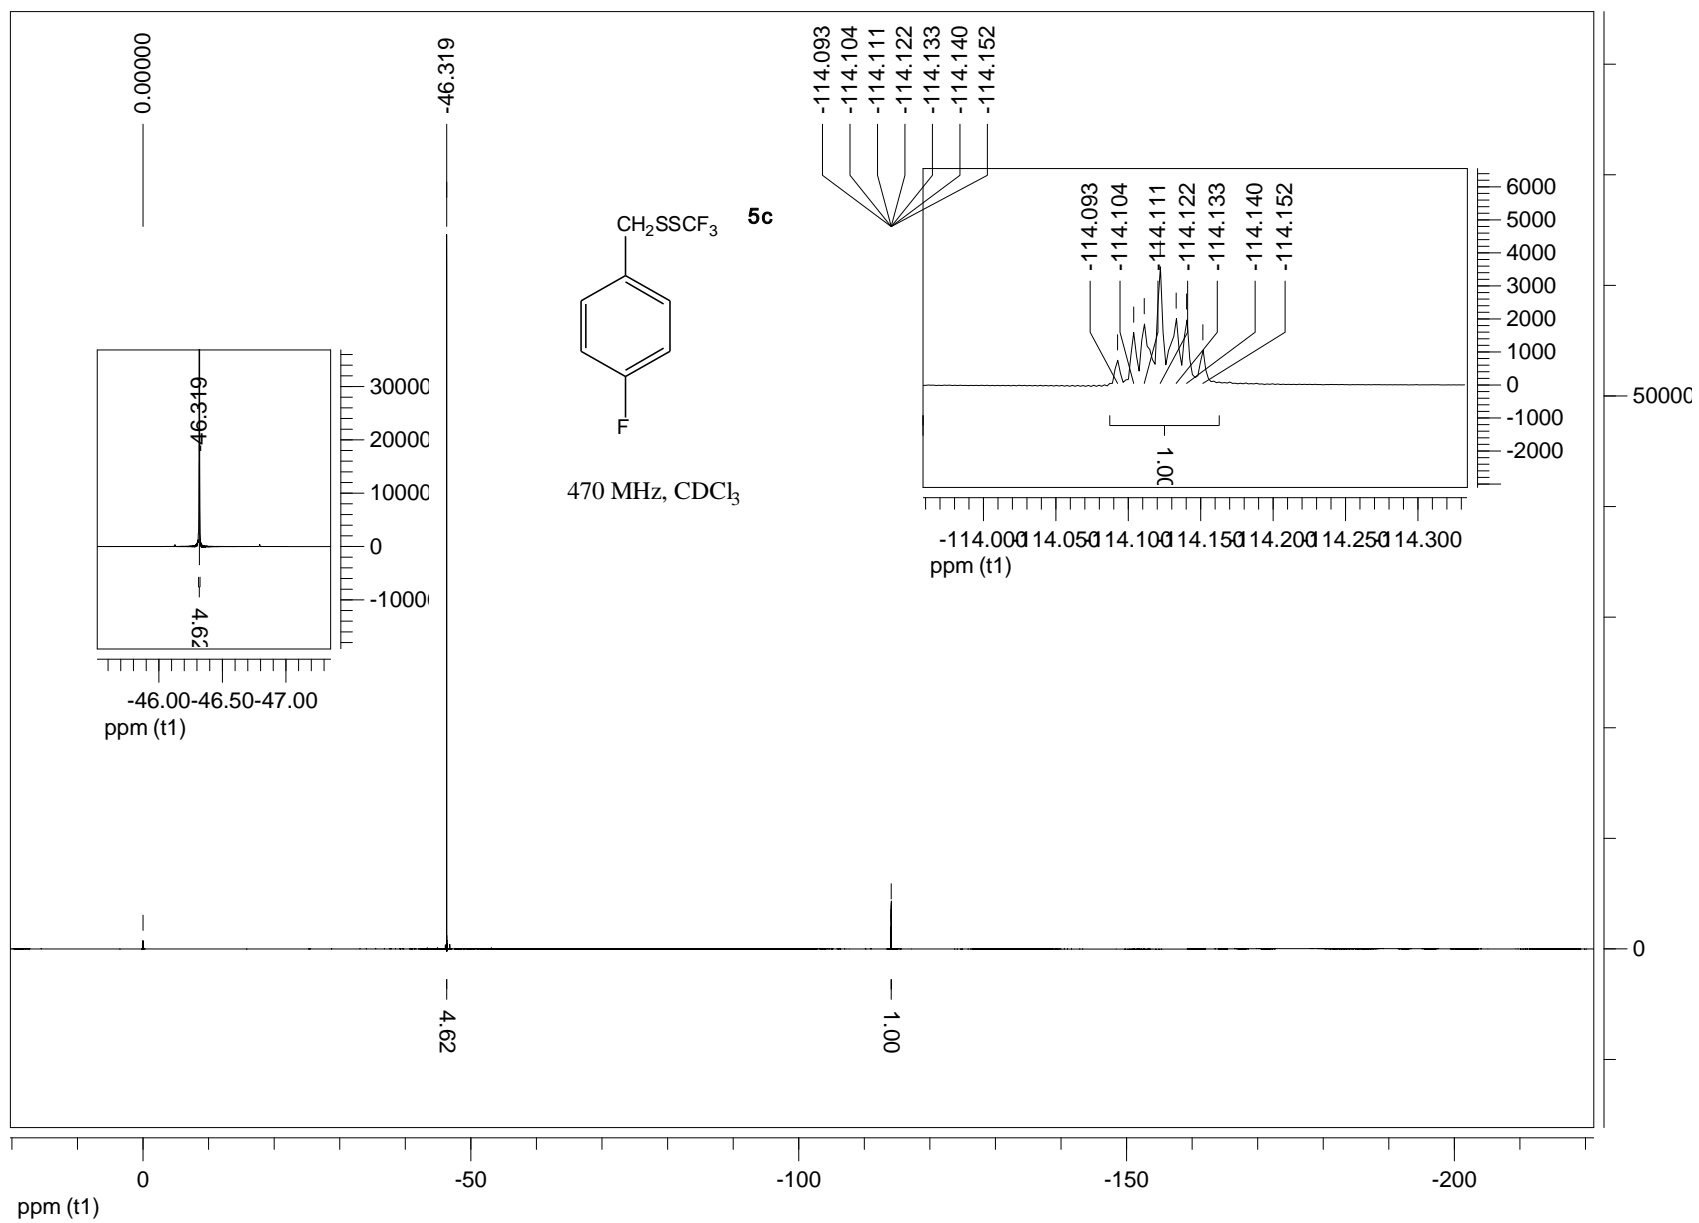



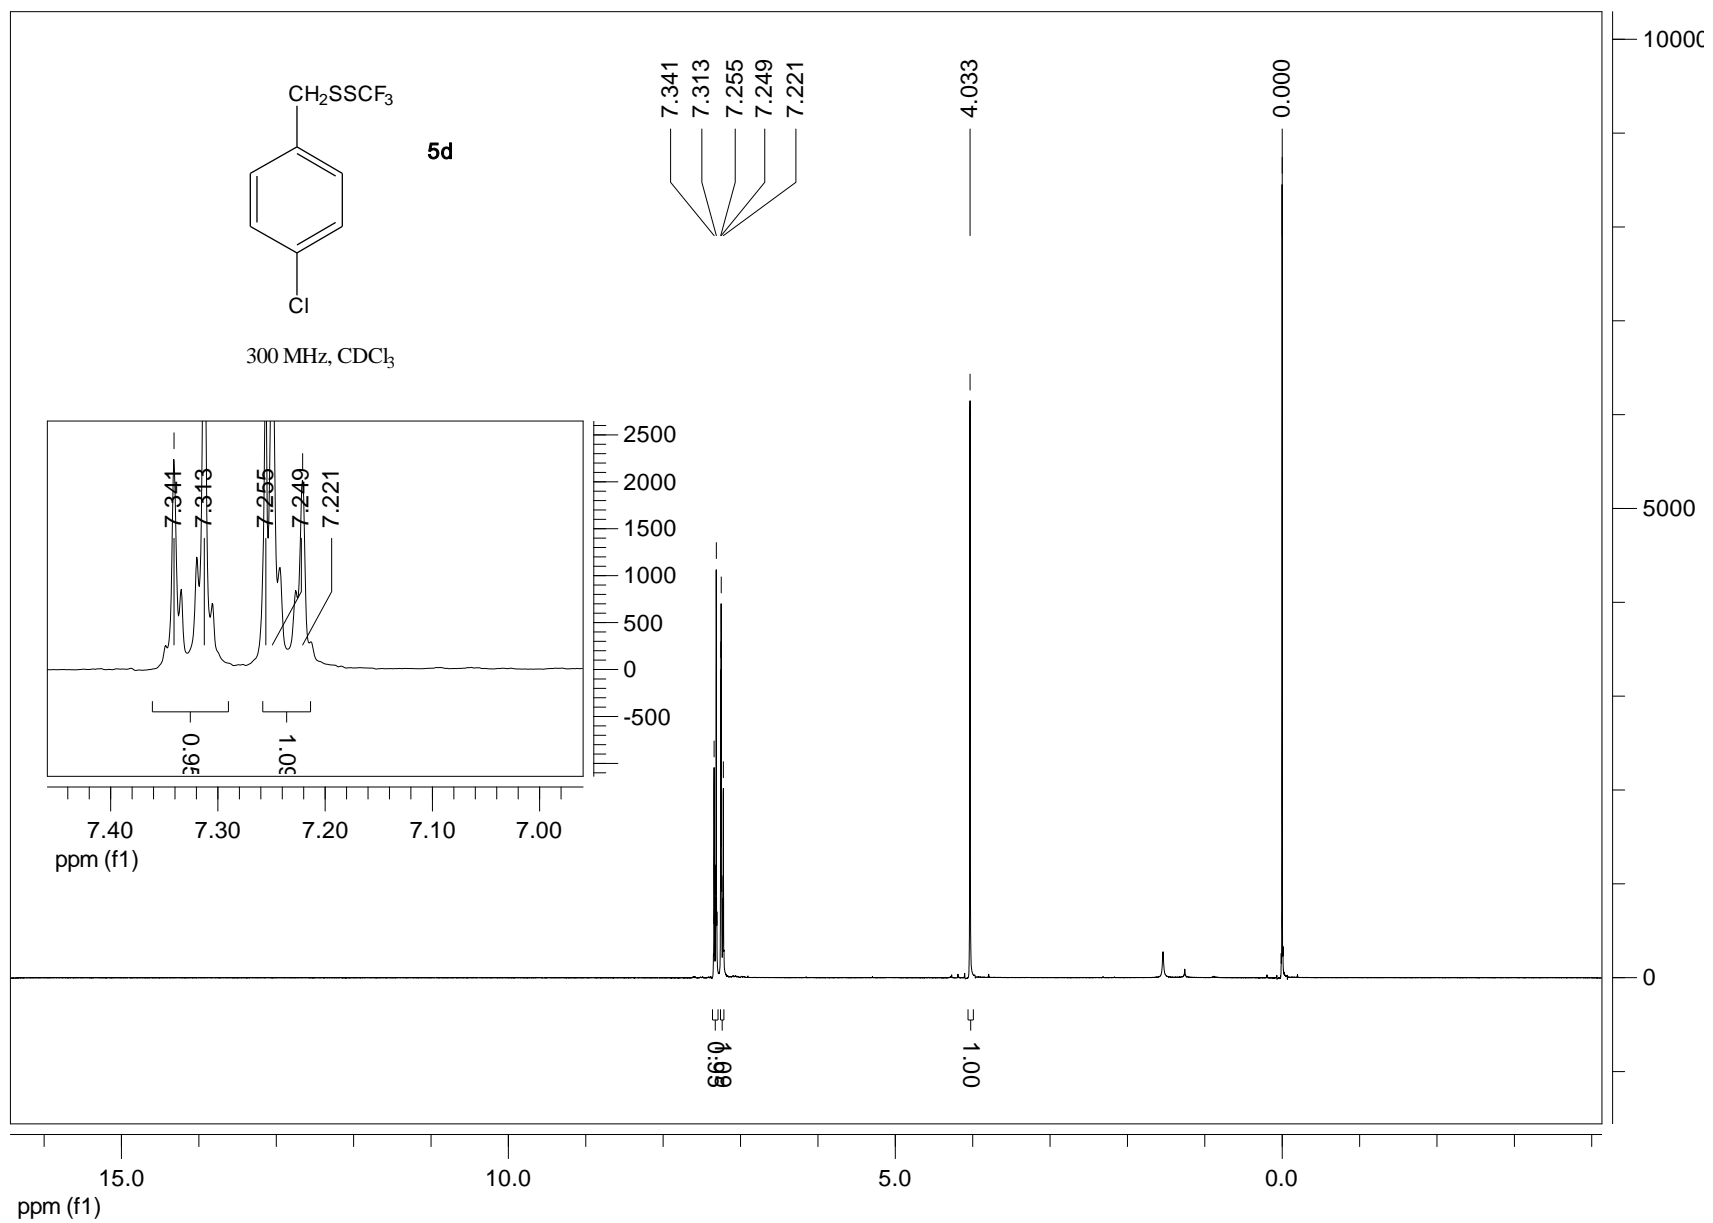

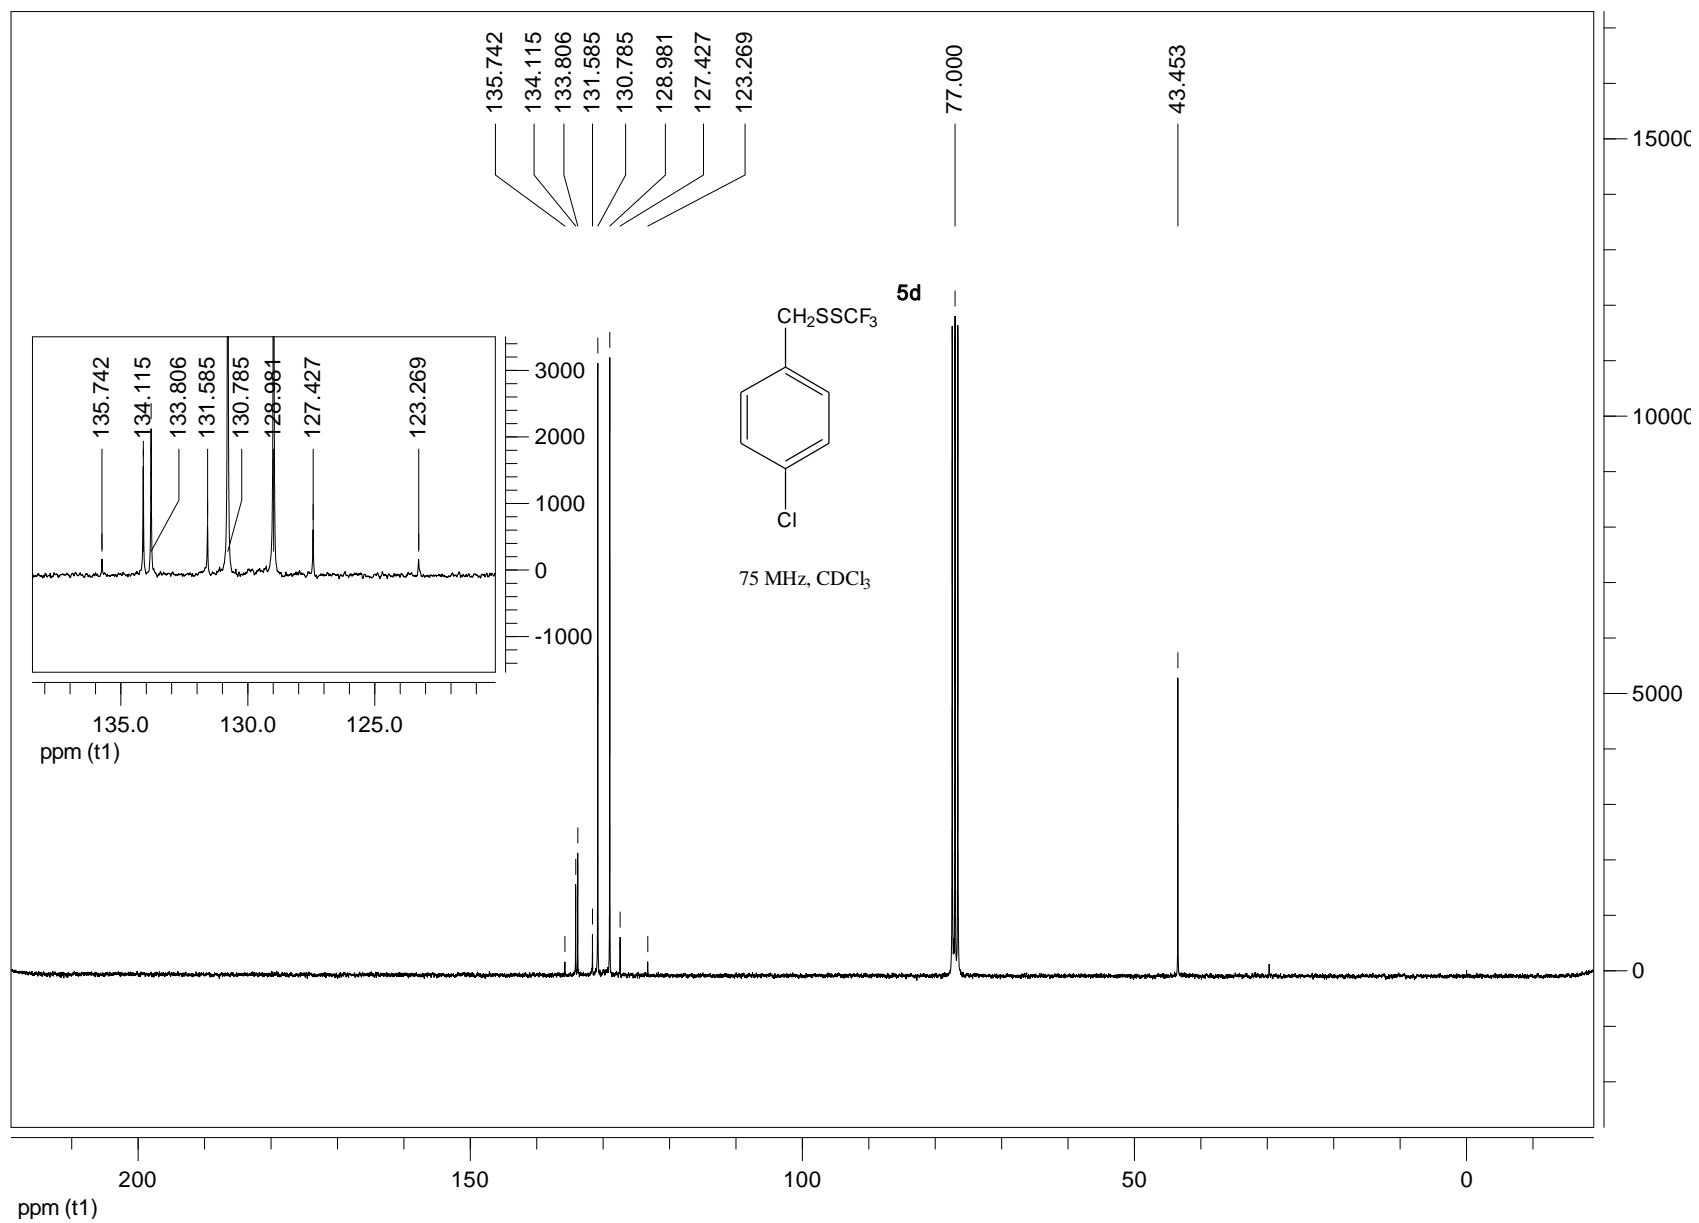

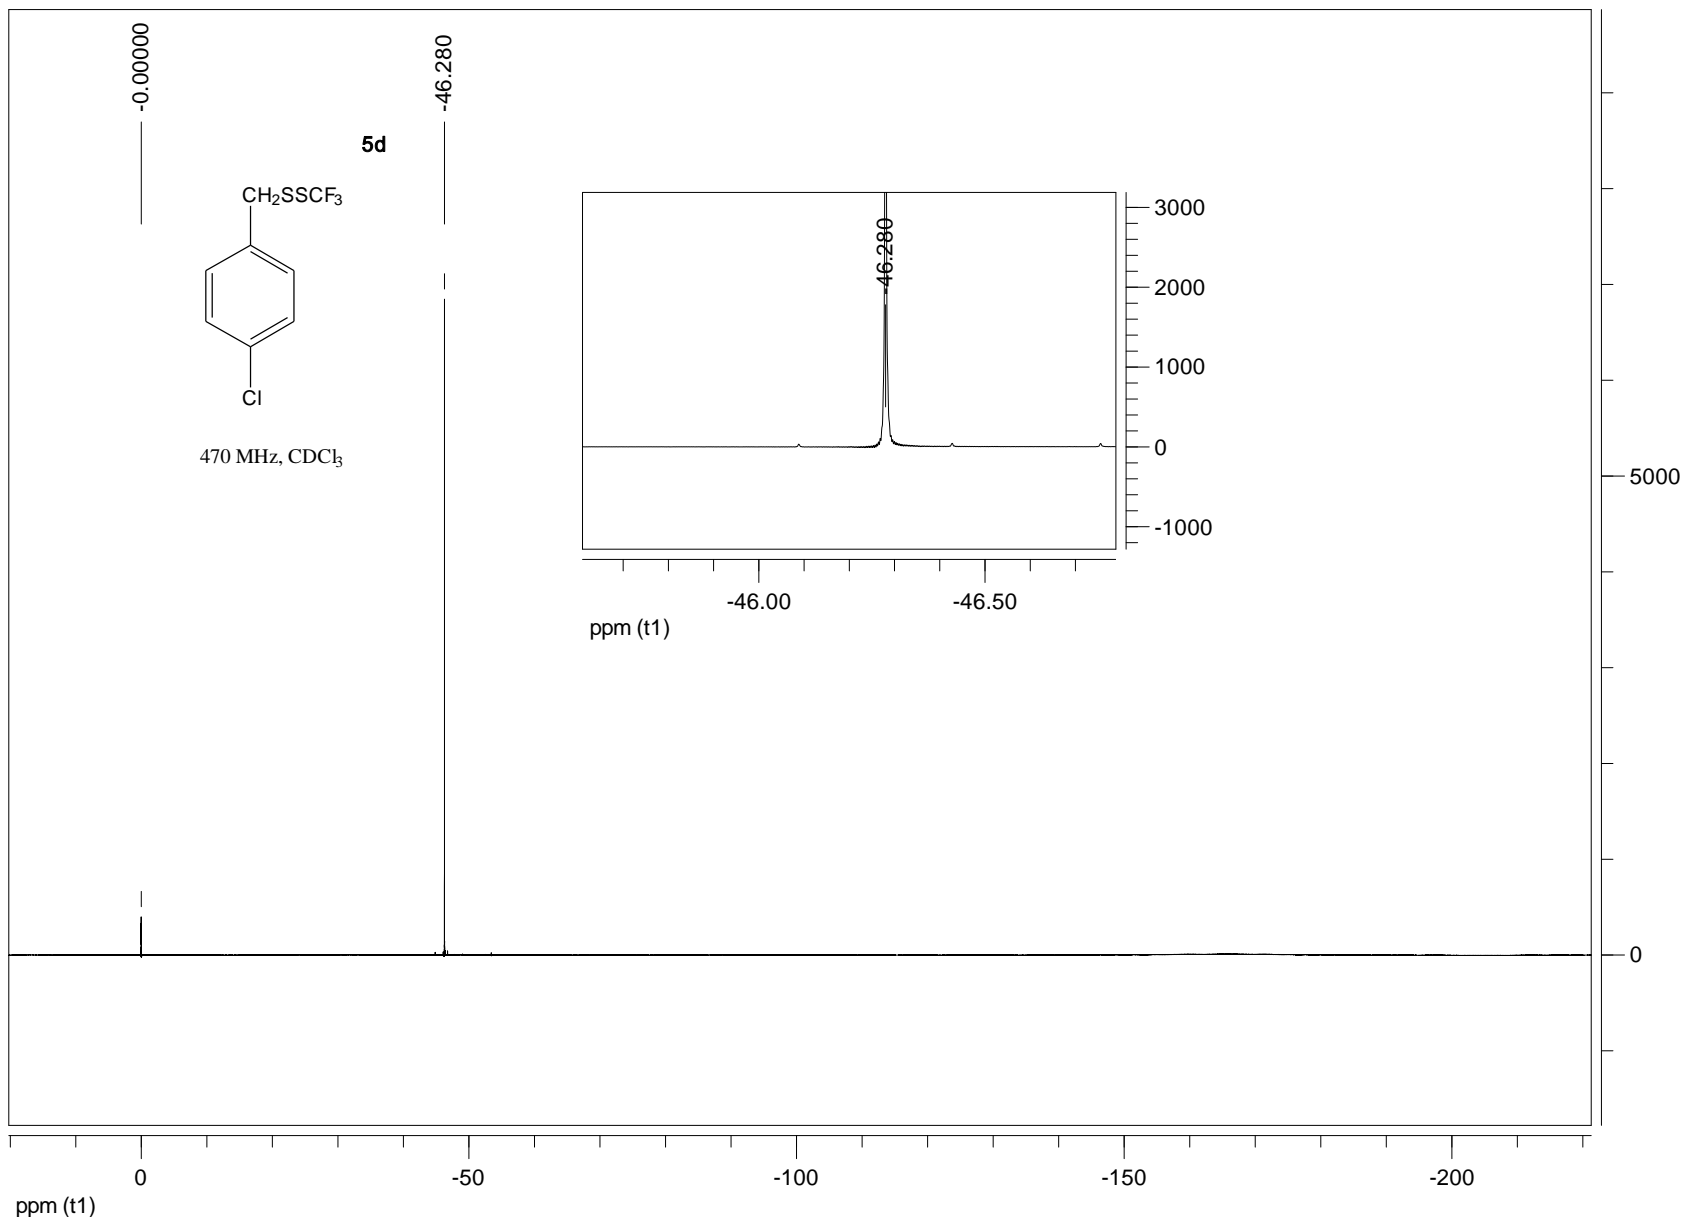

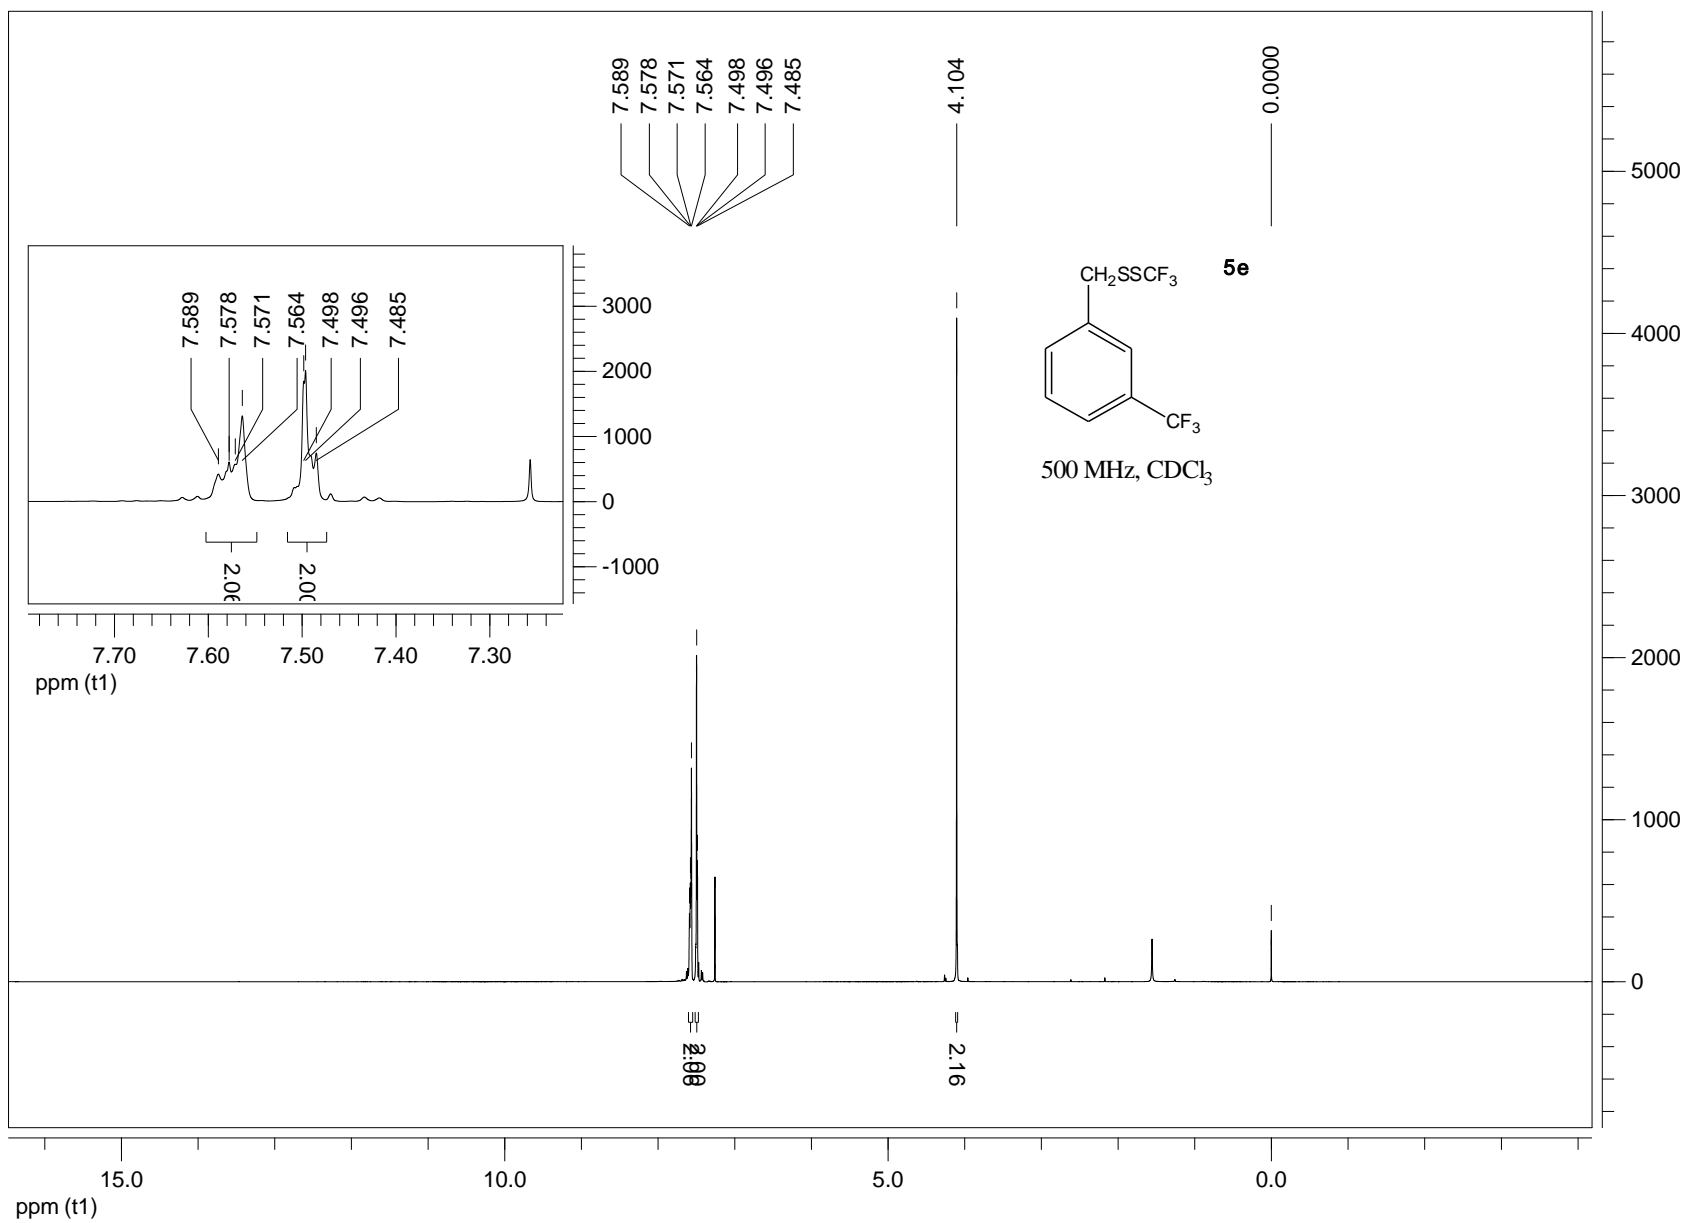

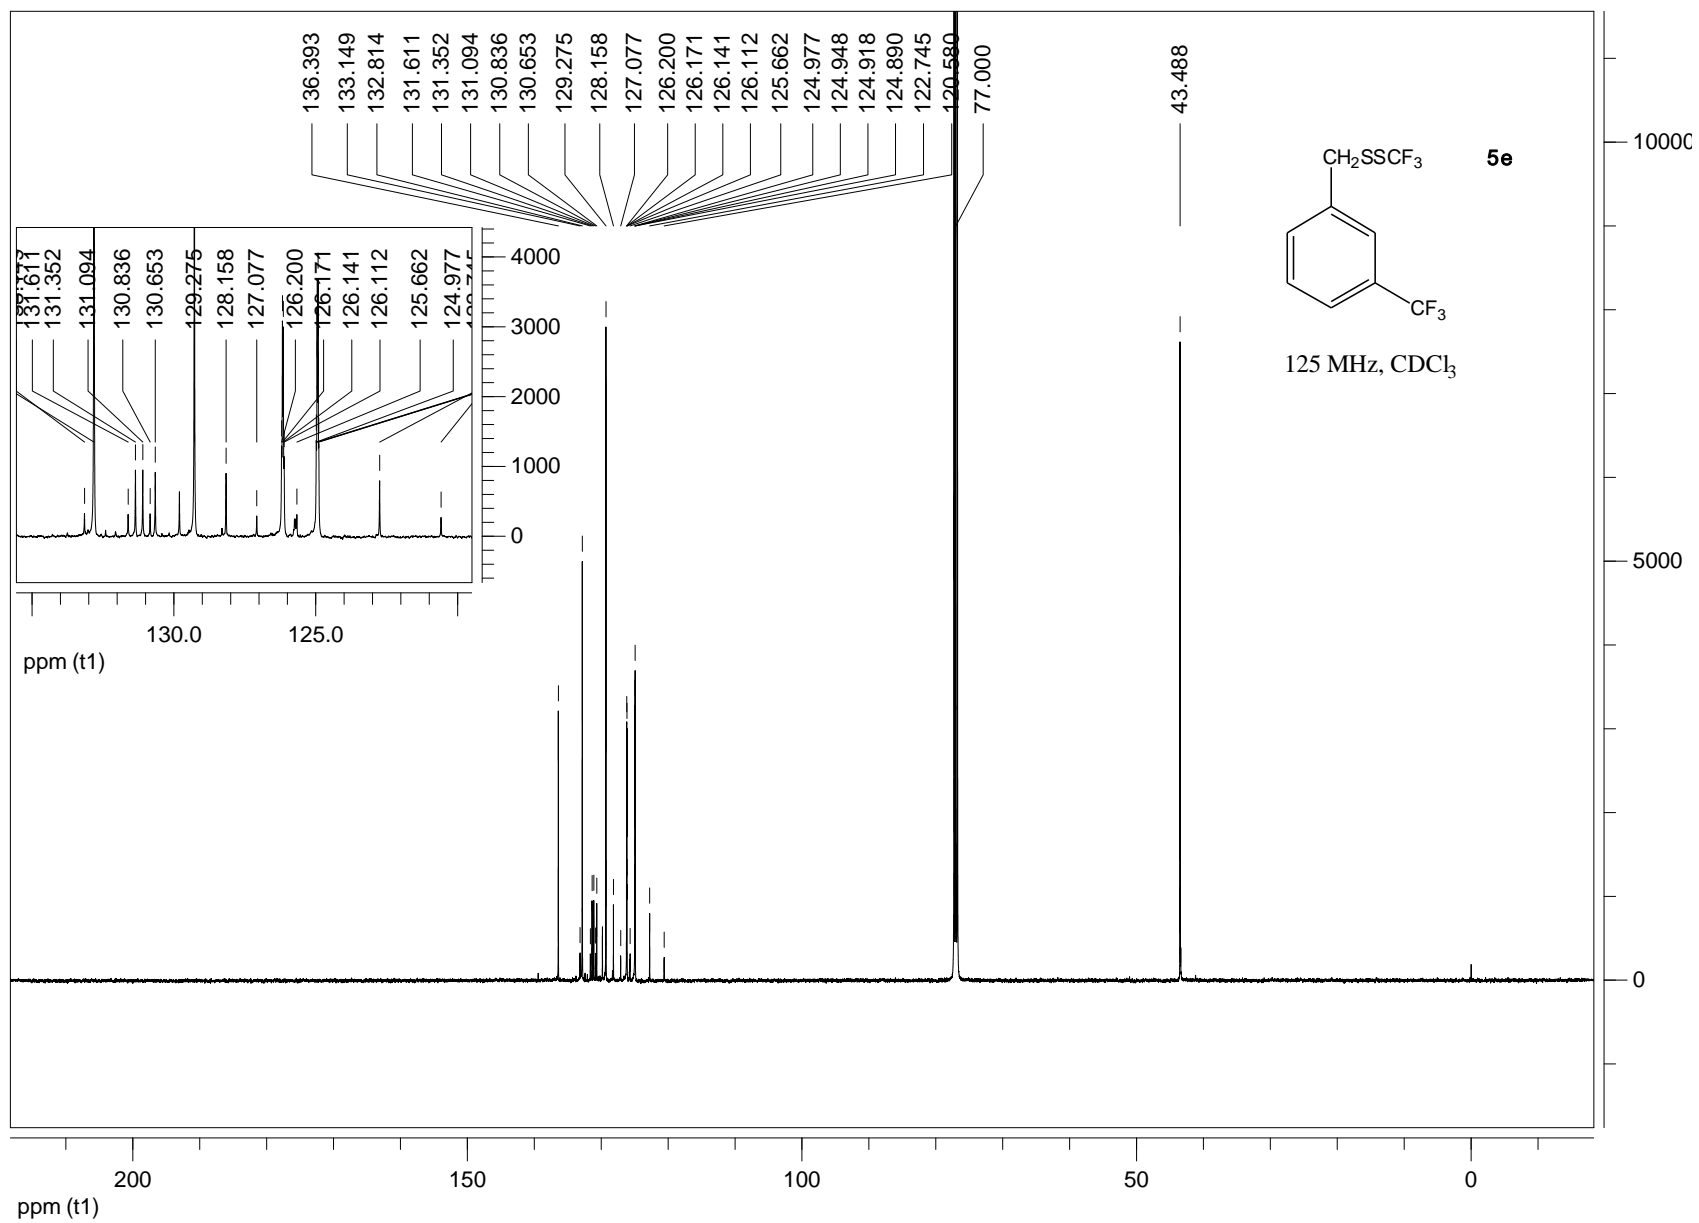

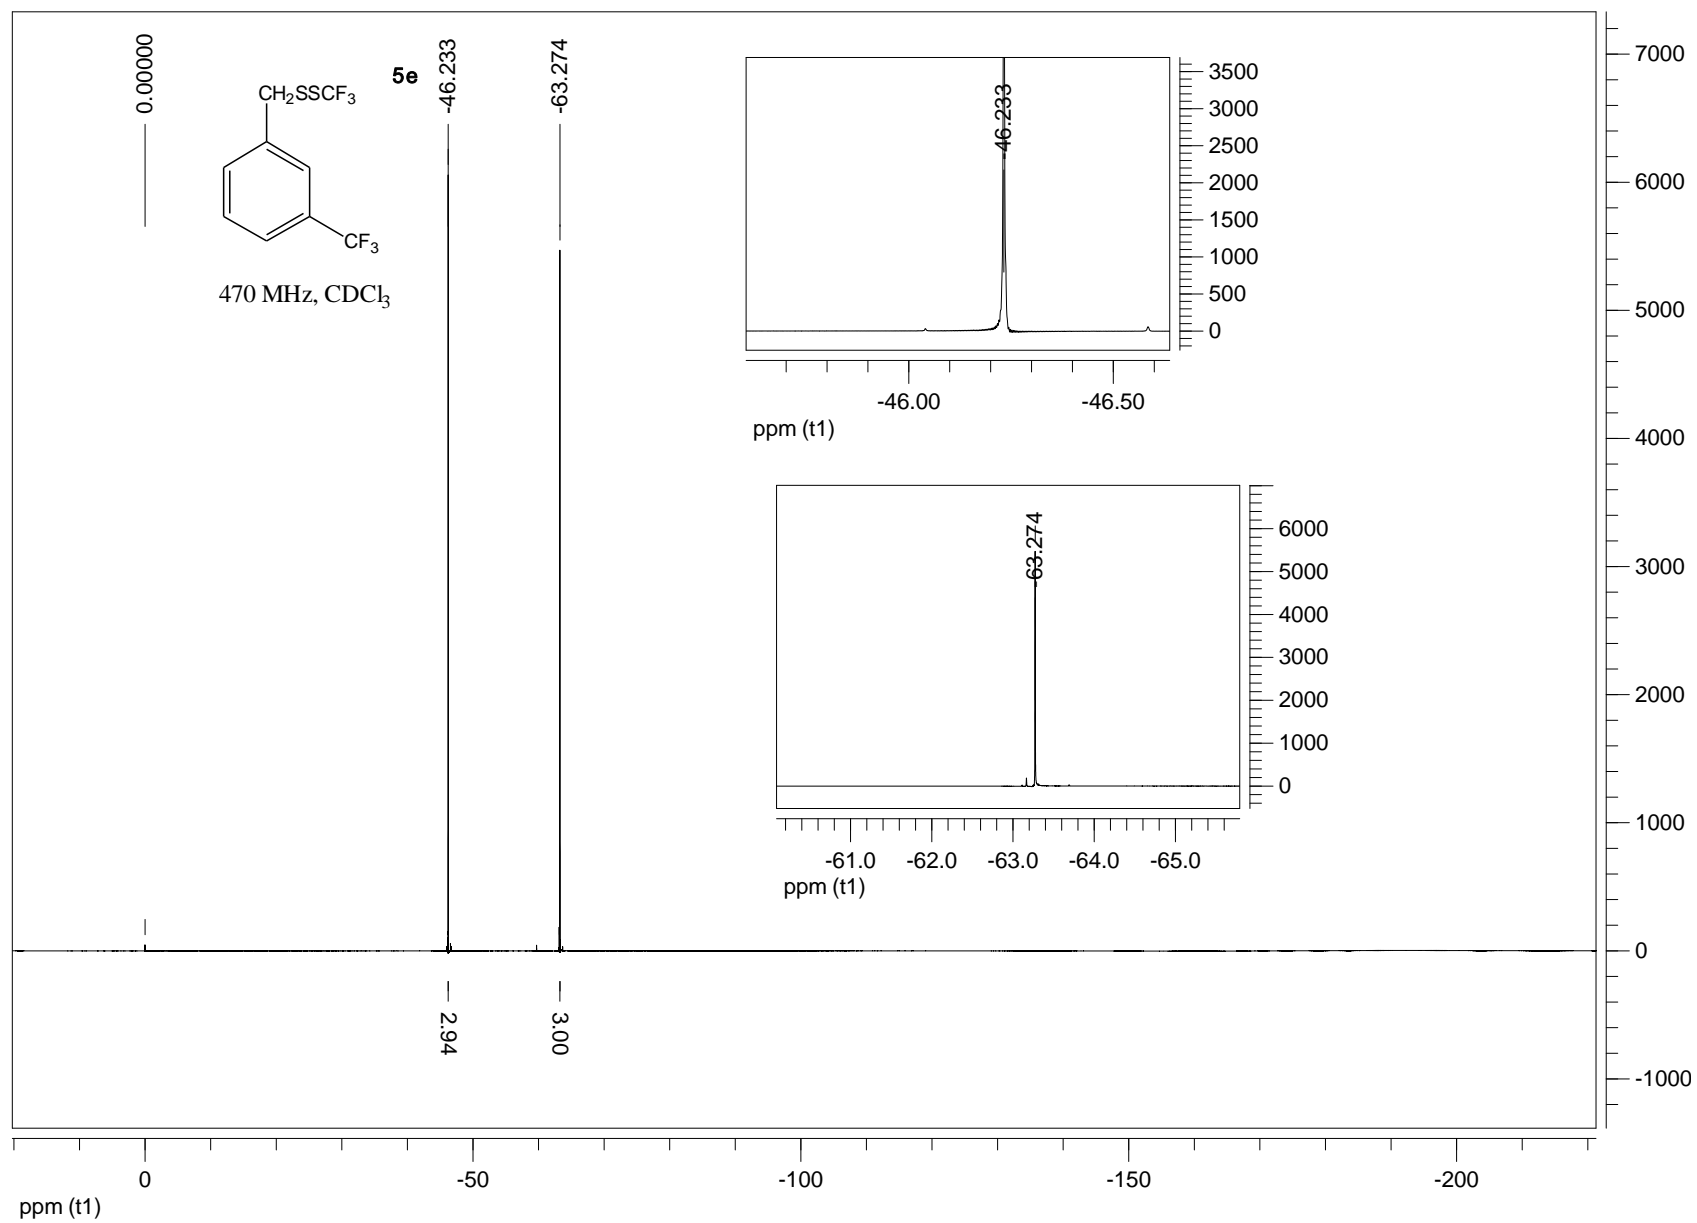

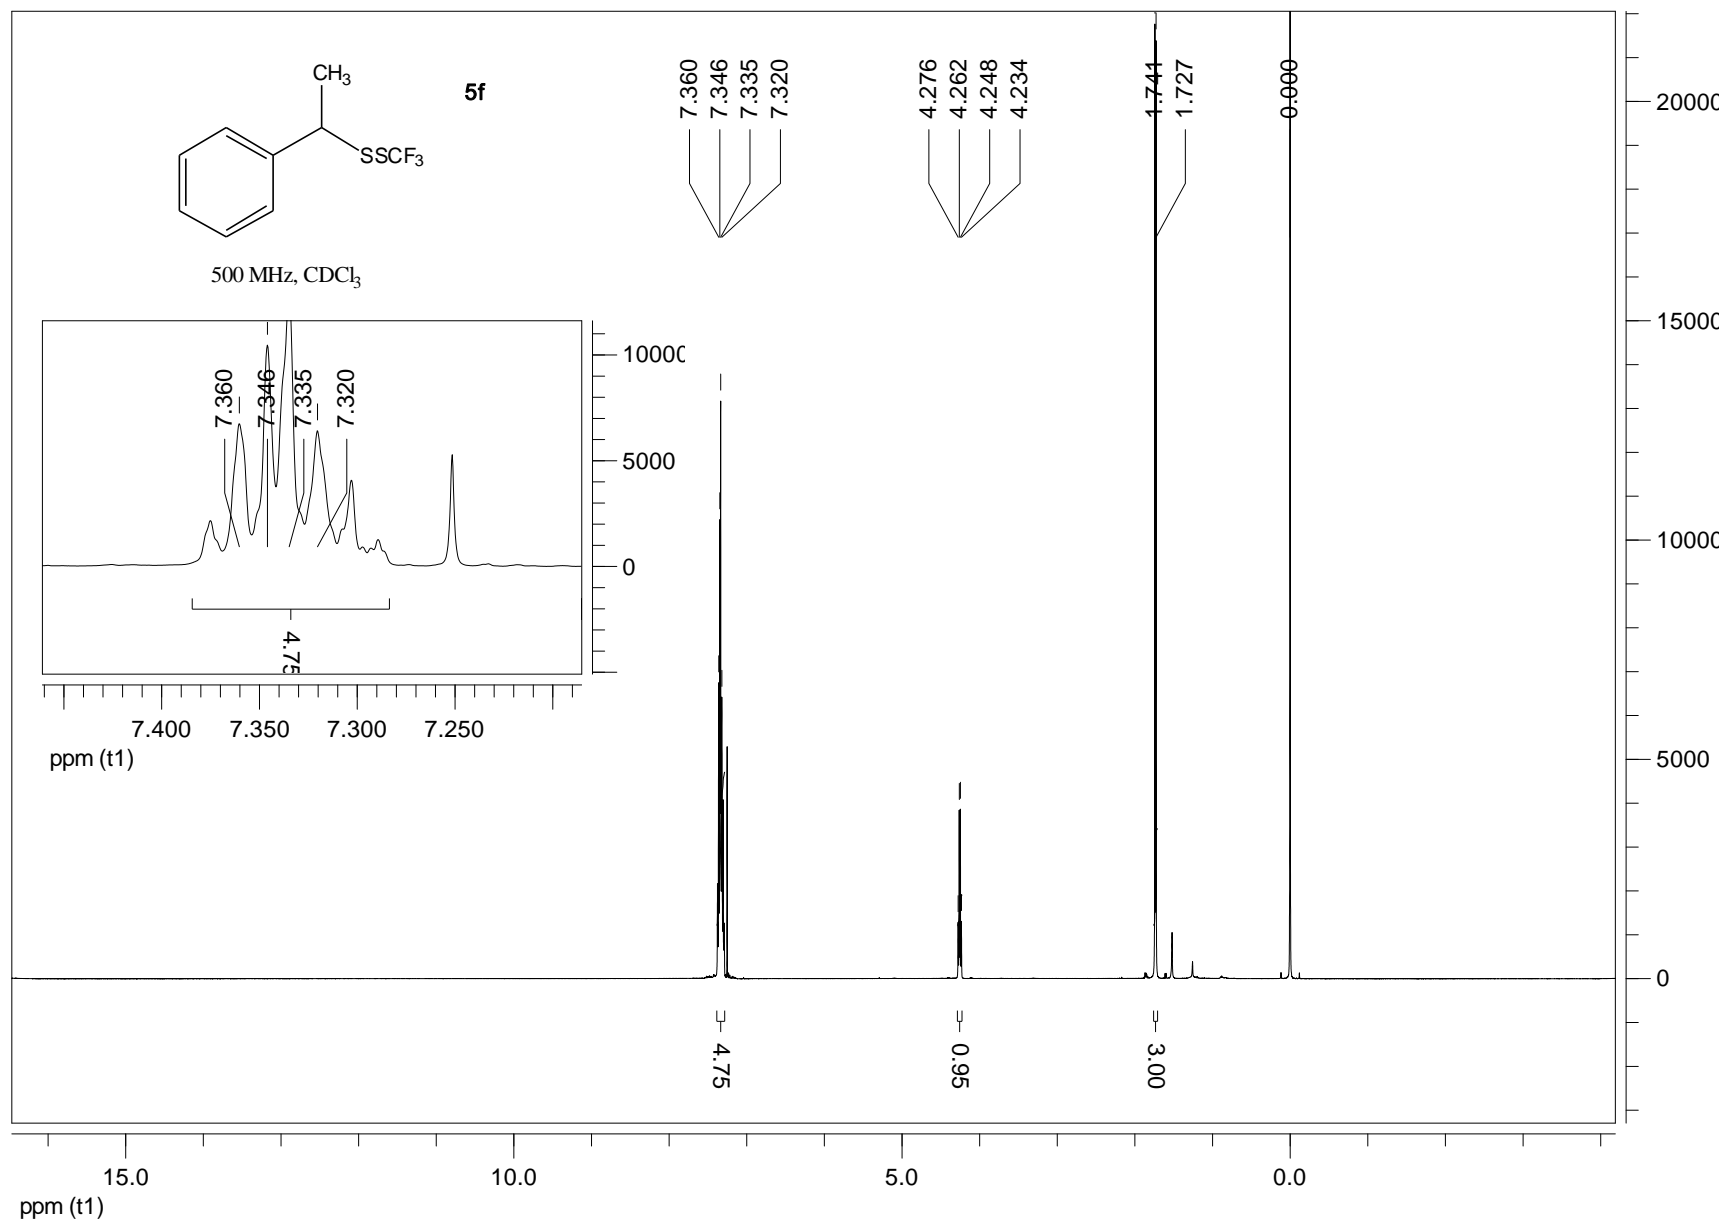

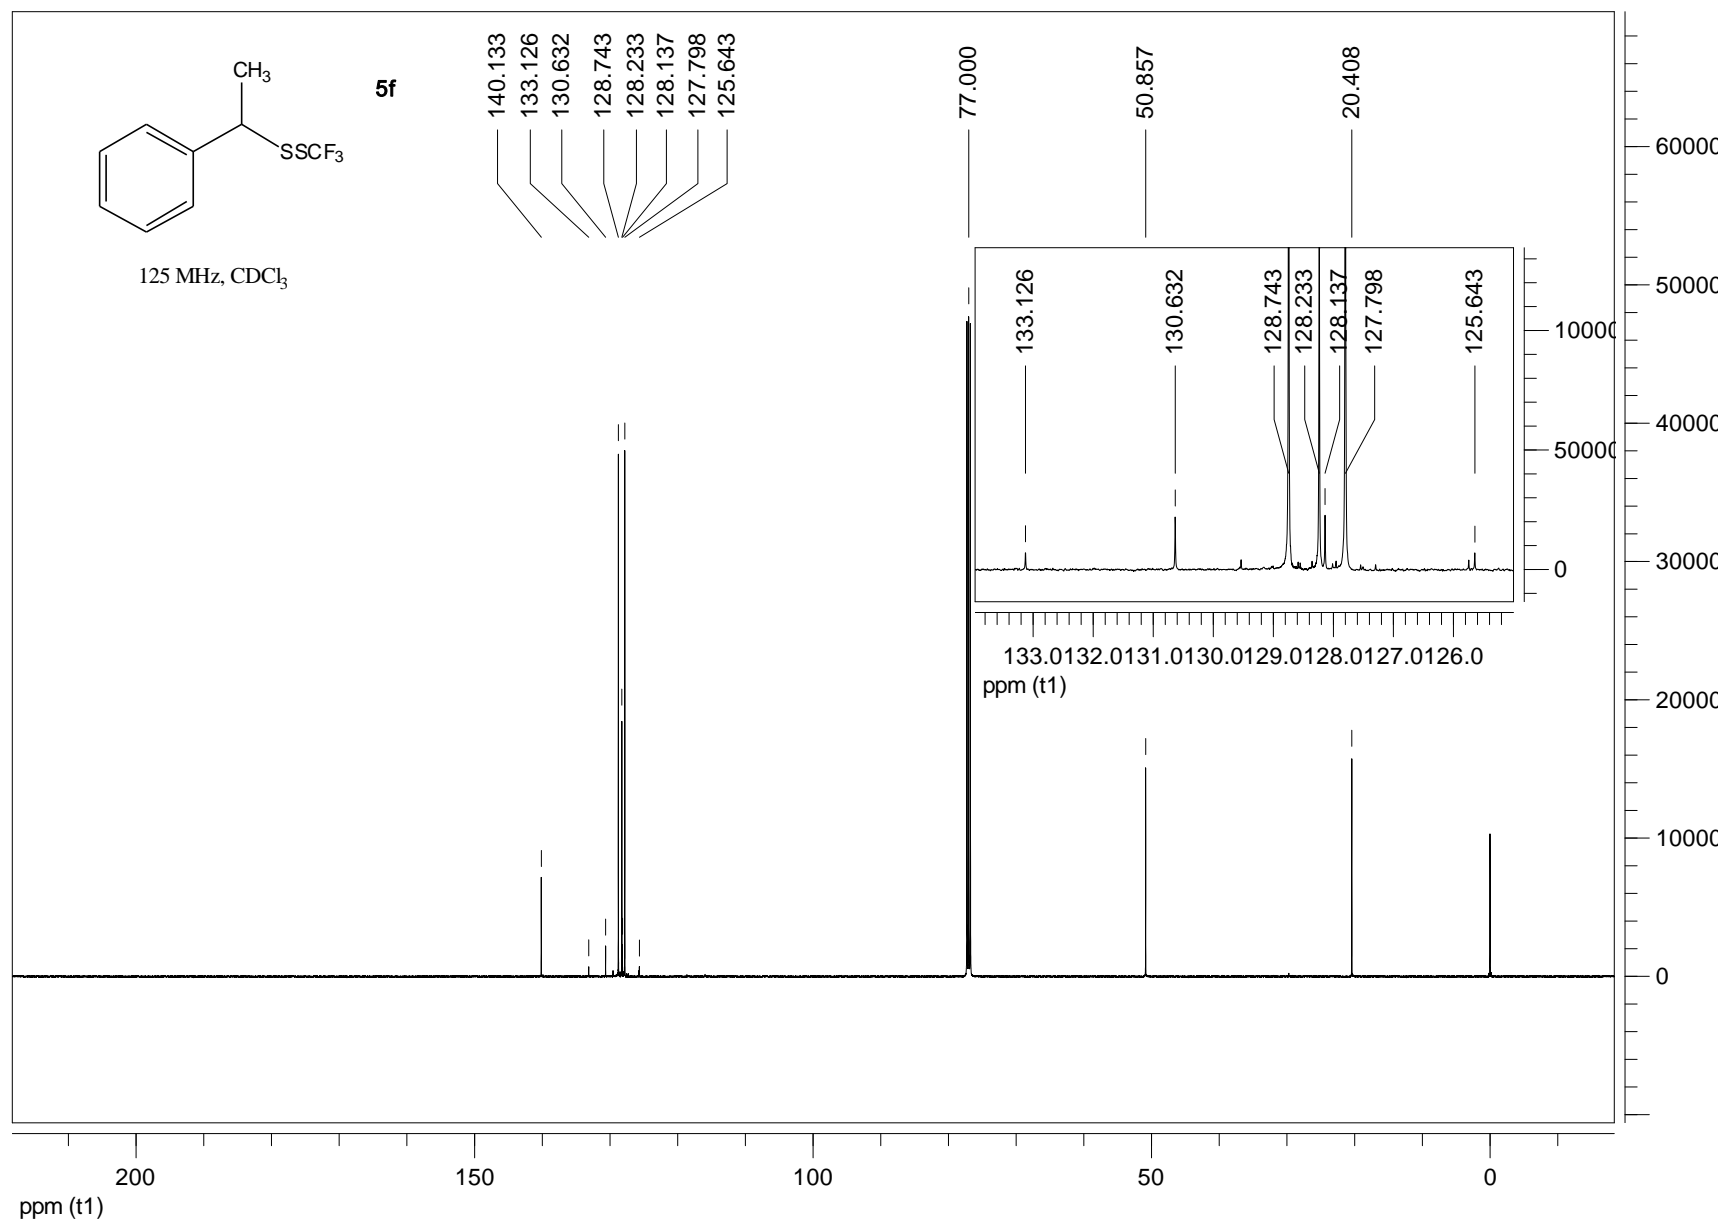



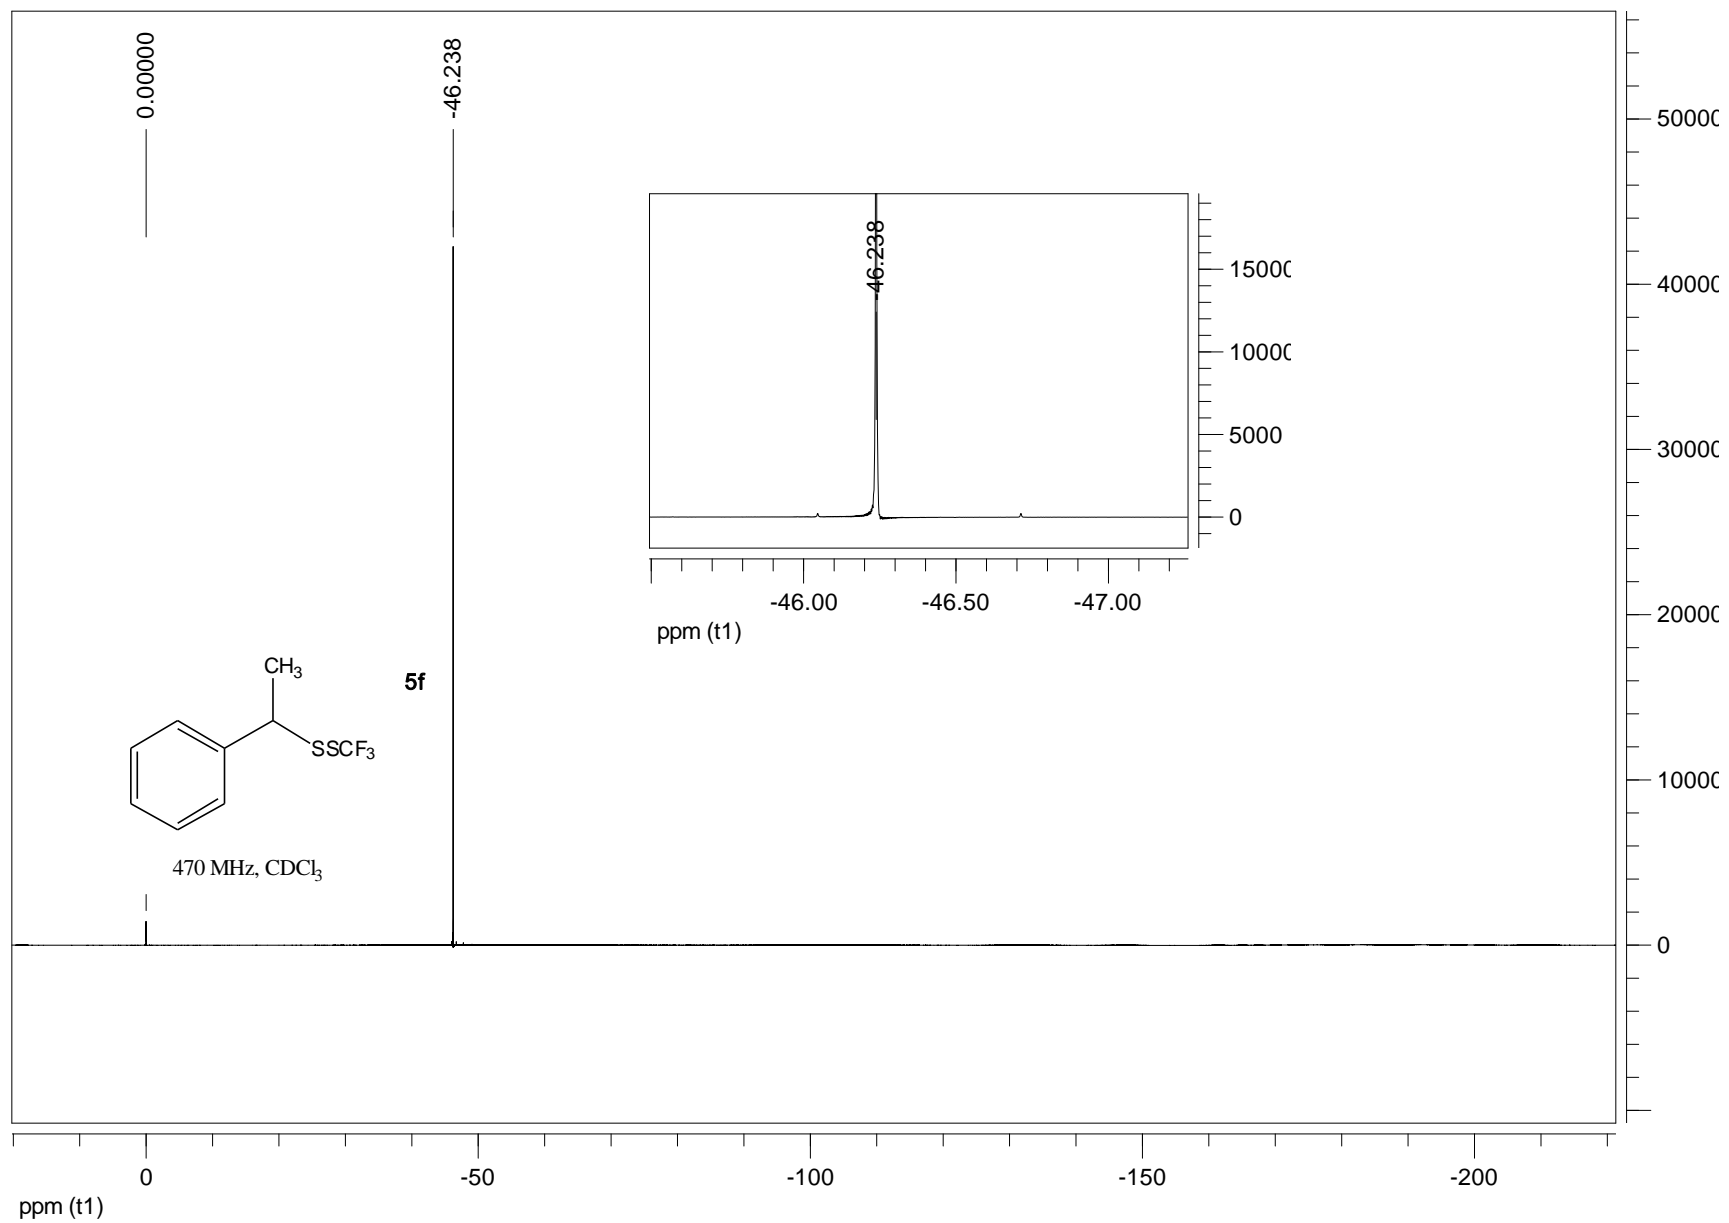

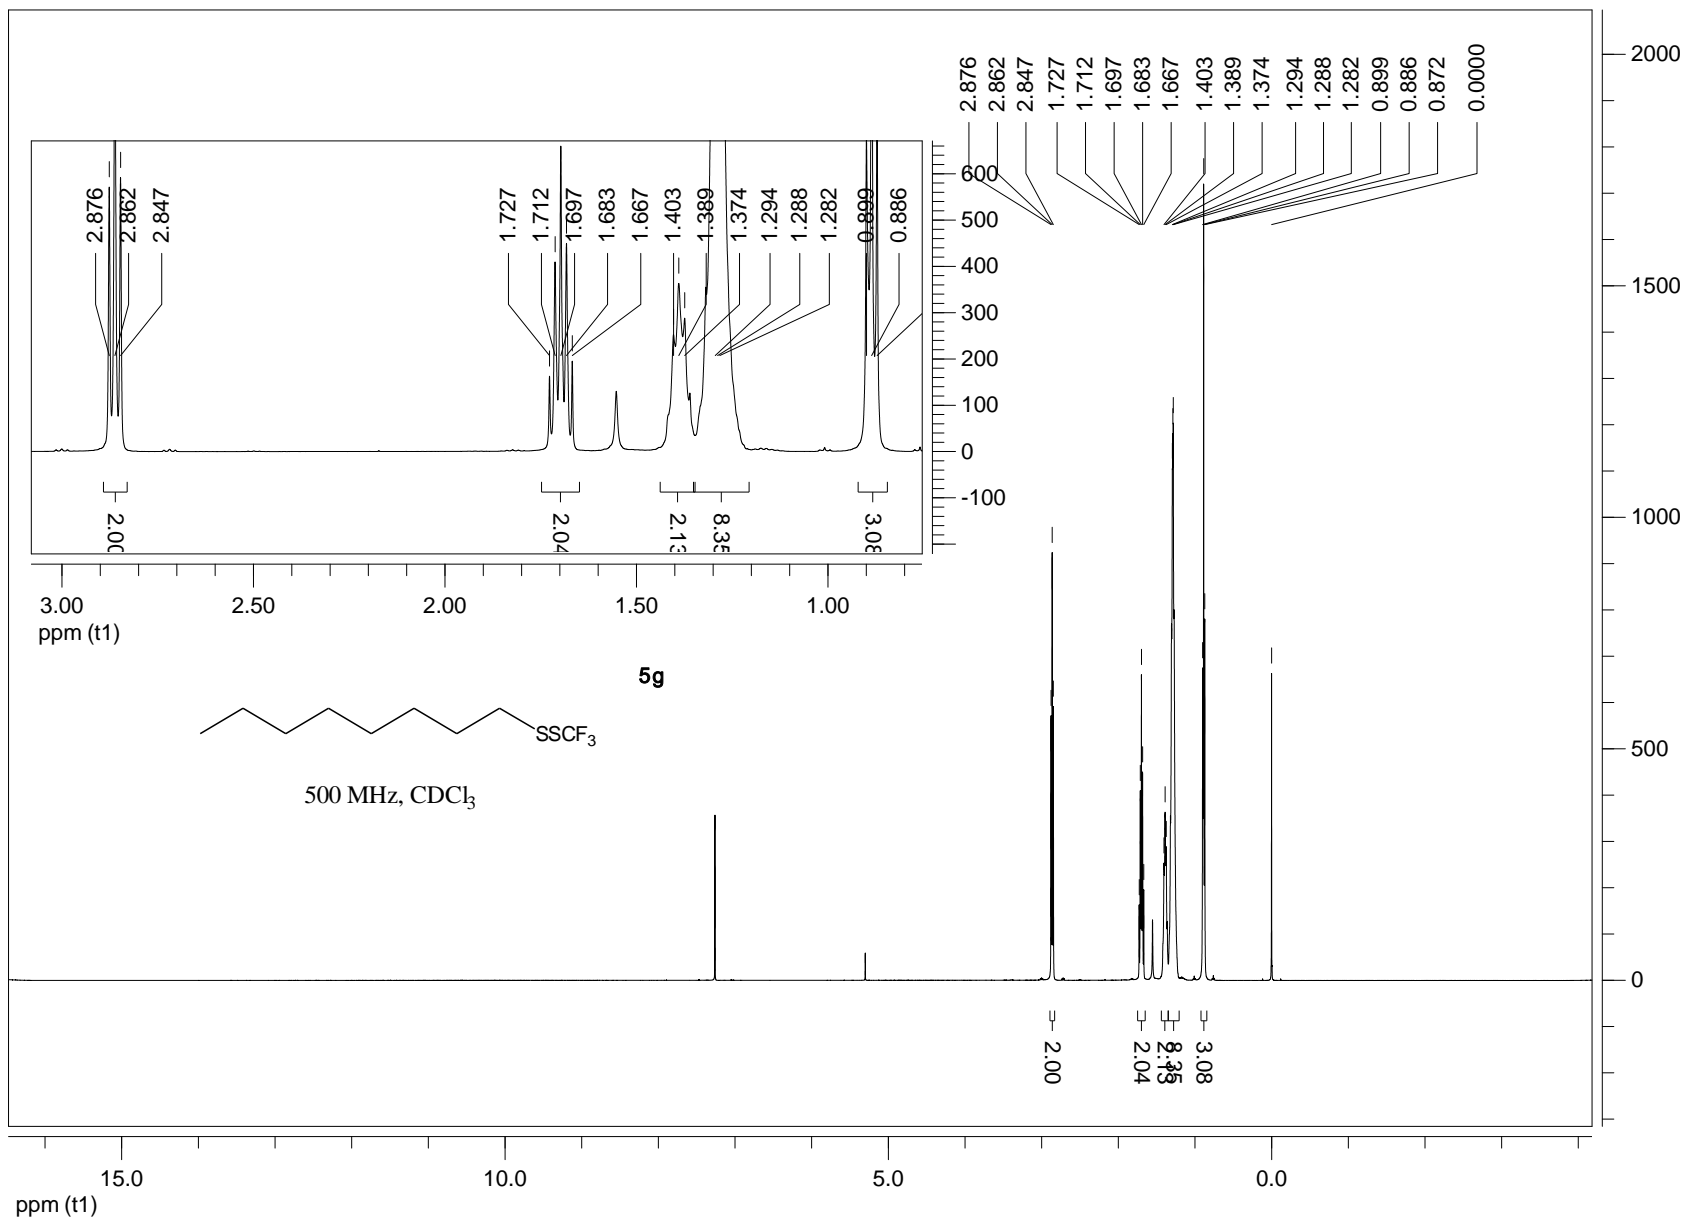

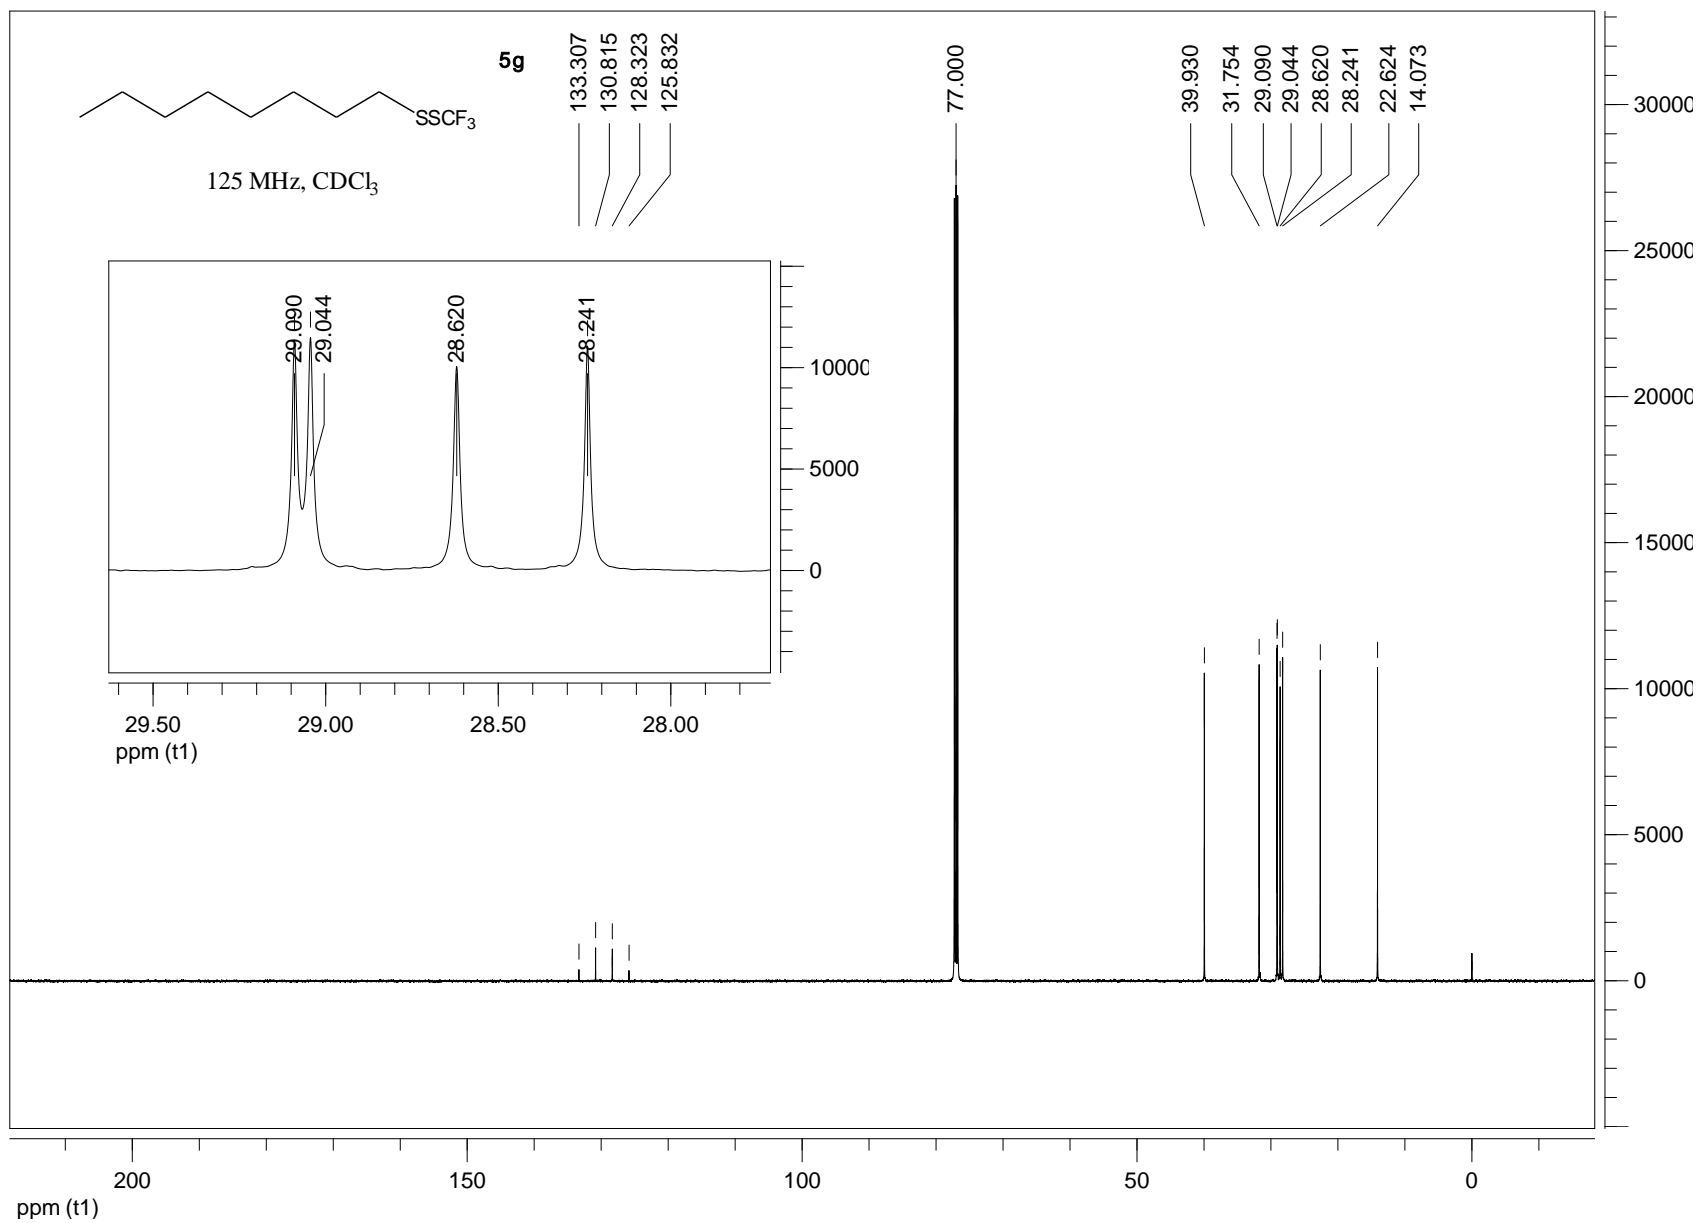

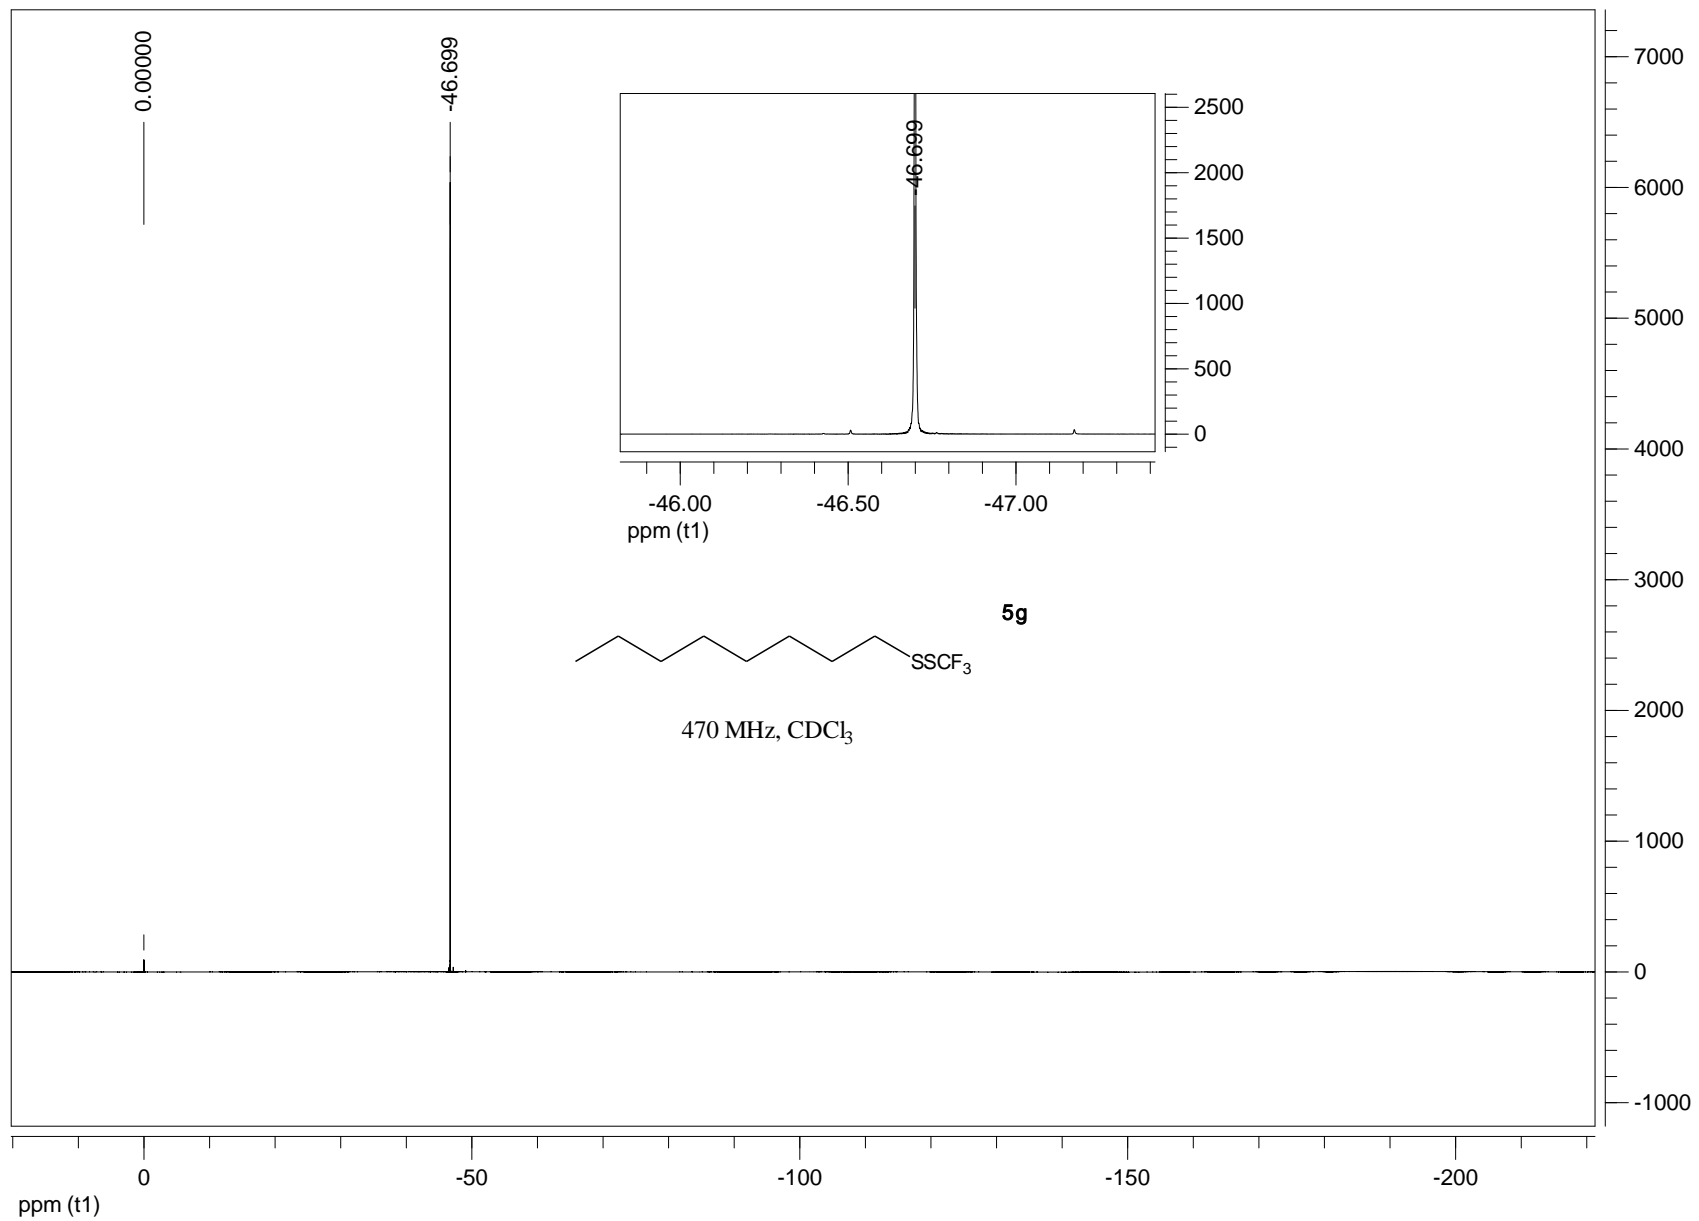

S80

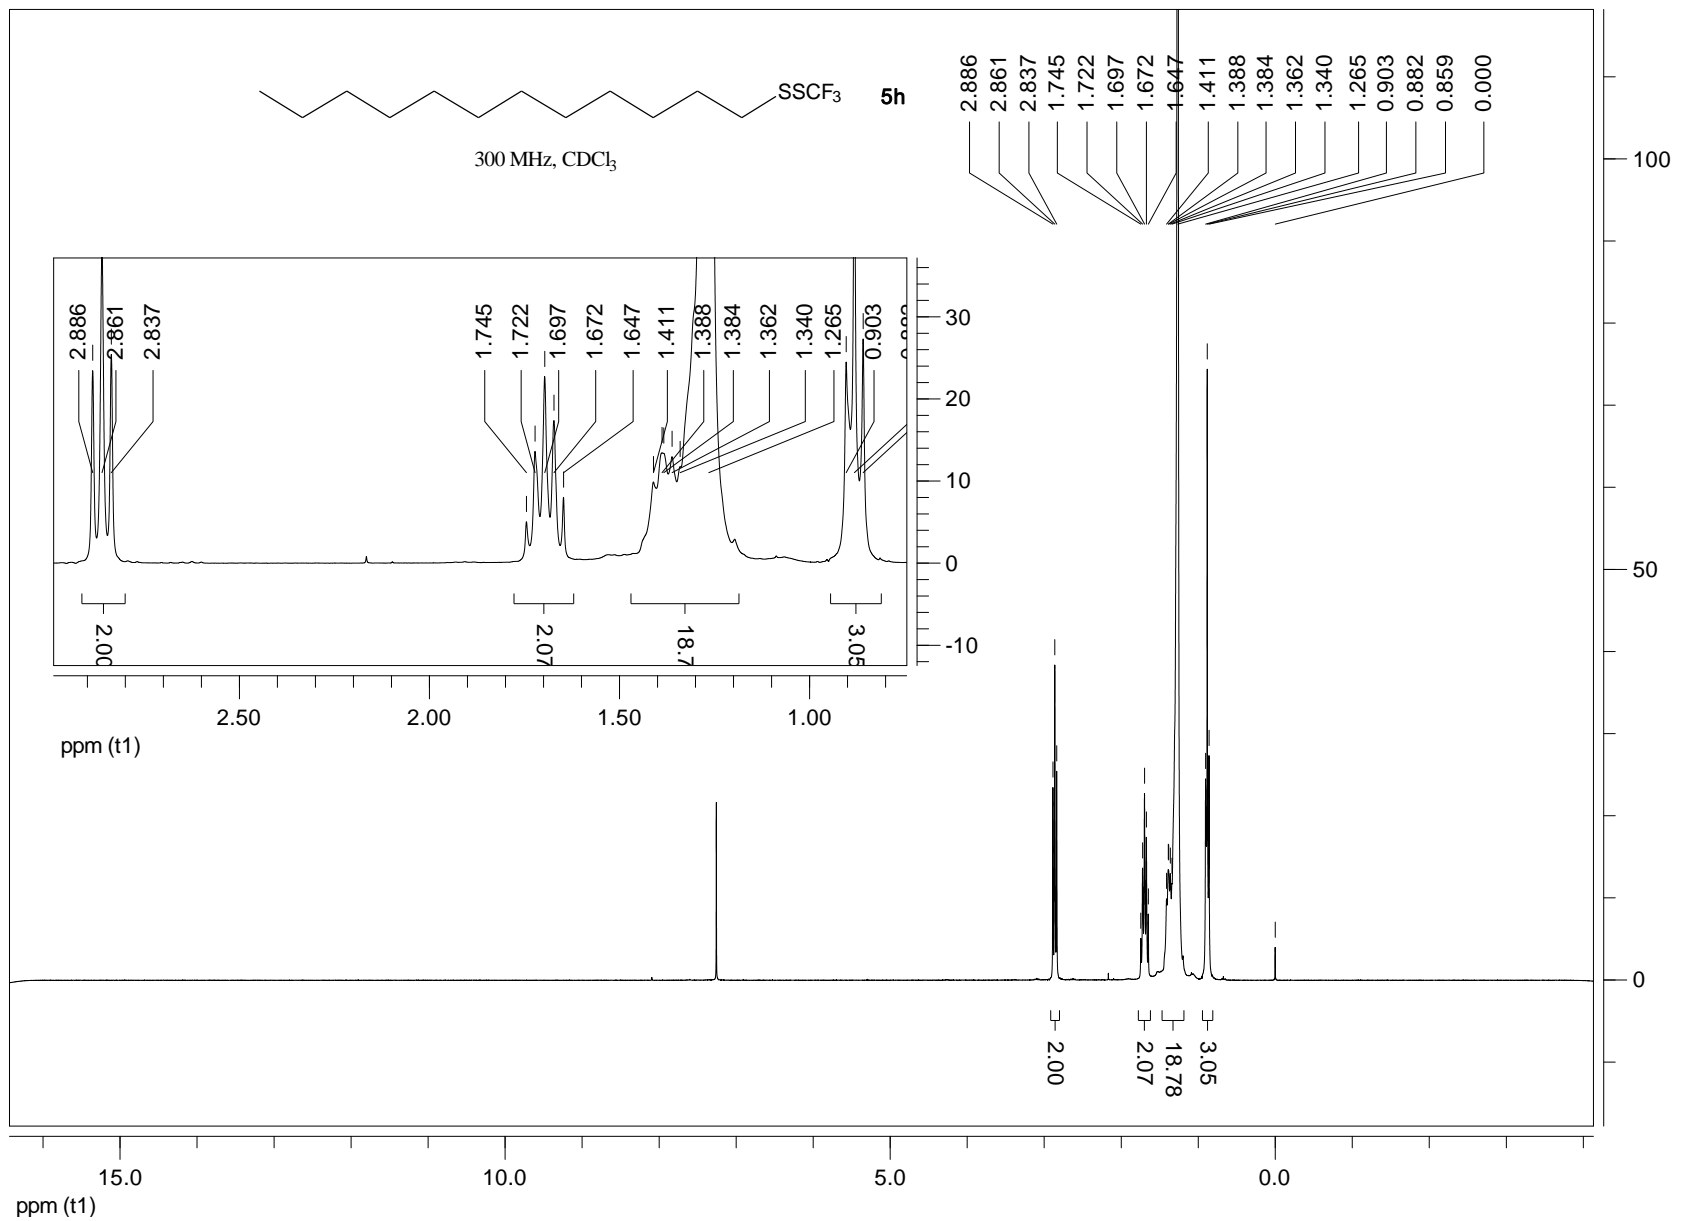

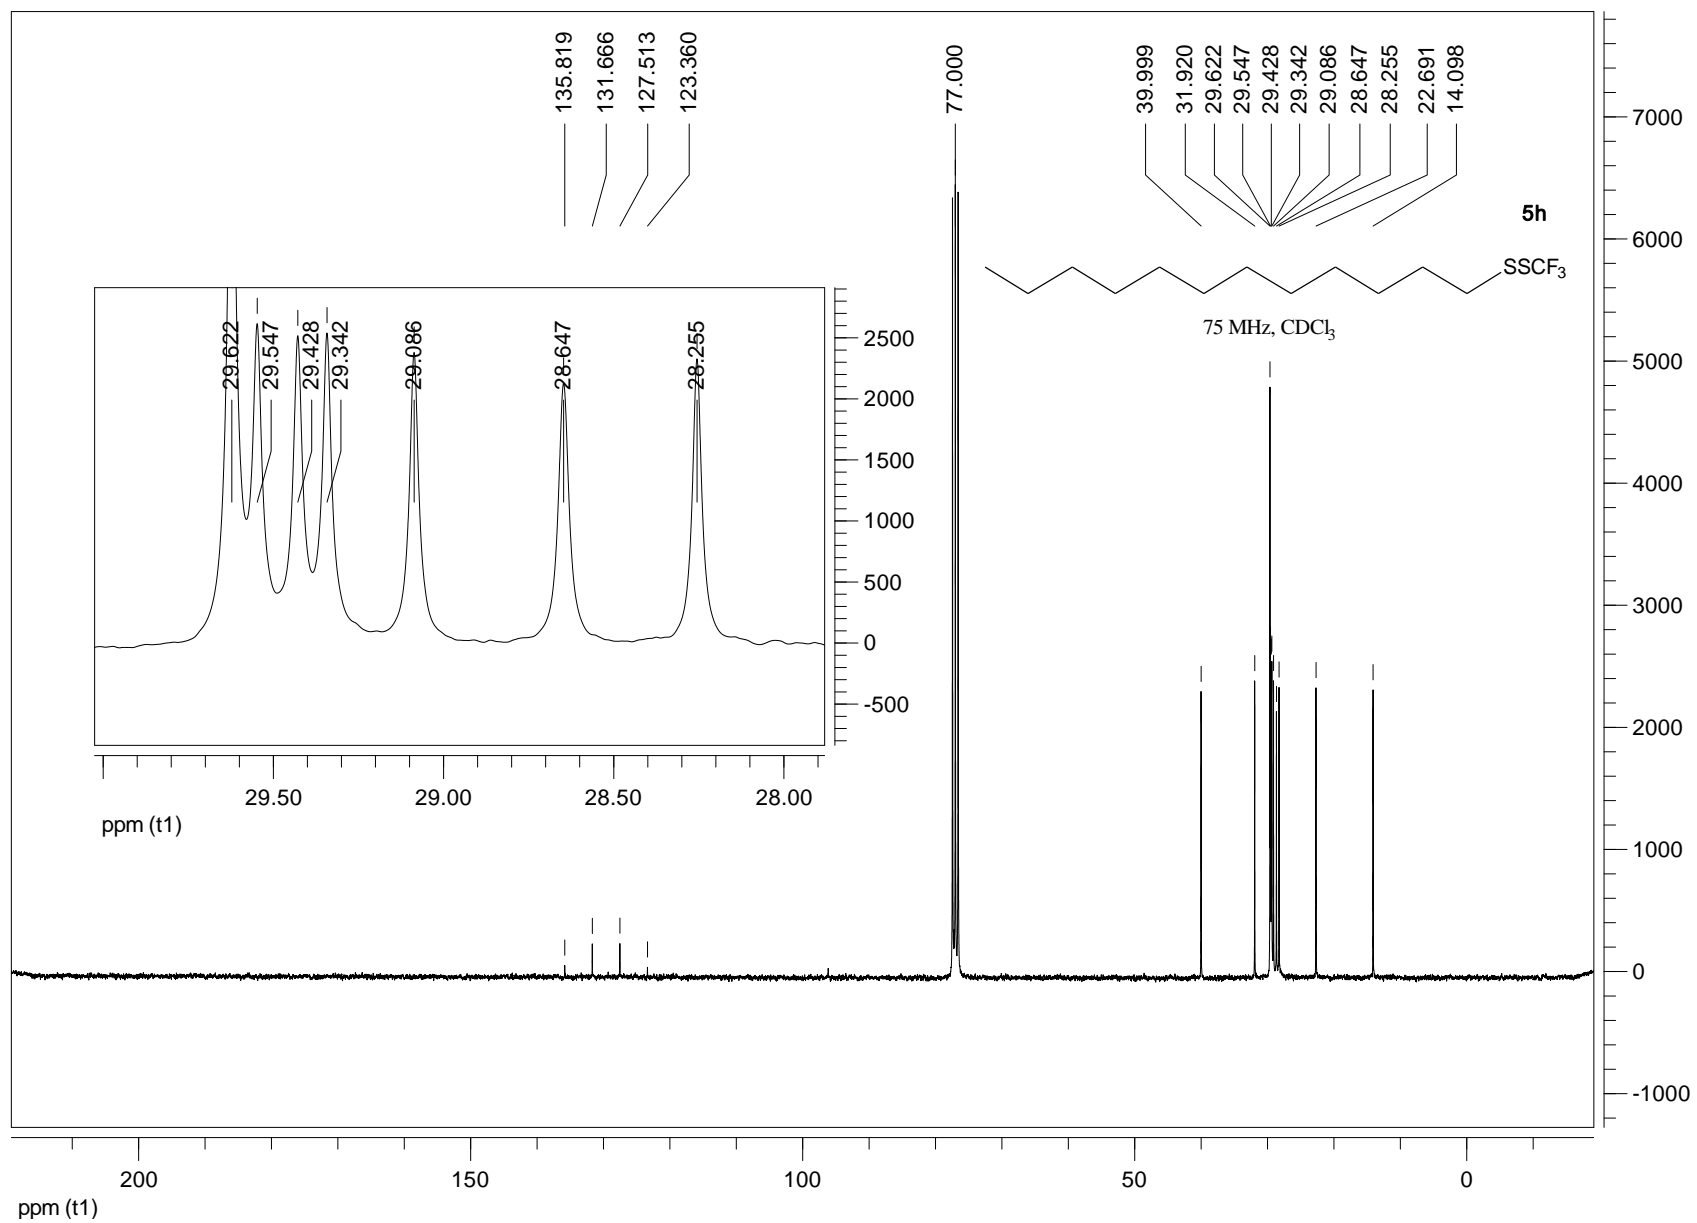

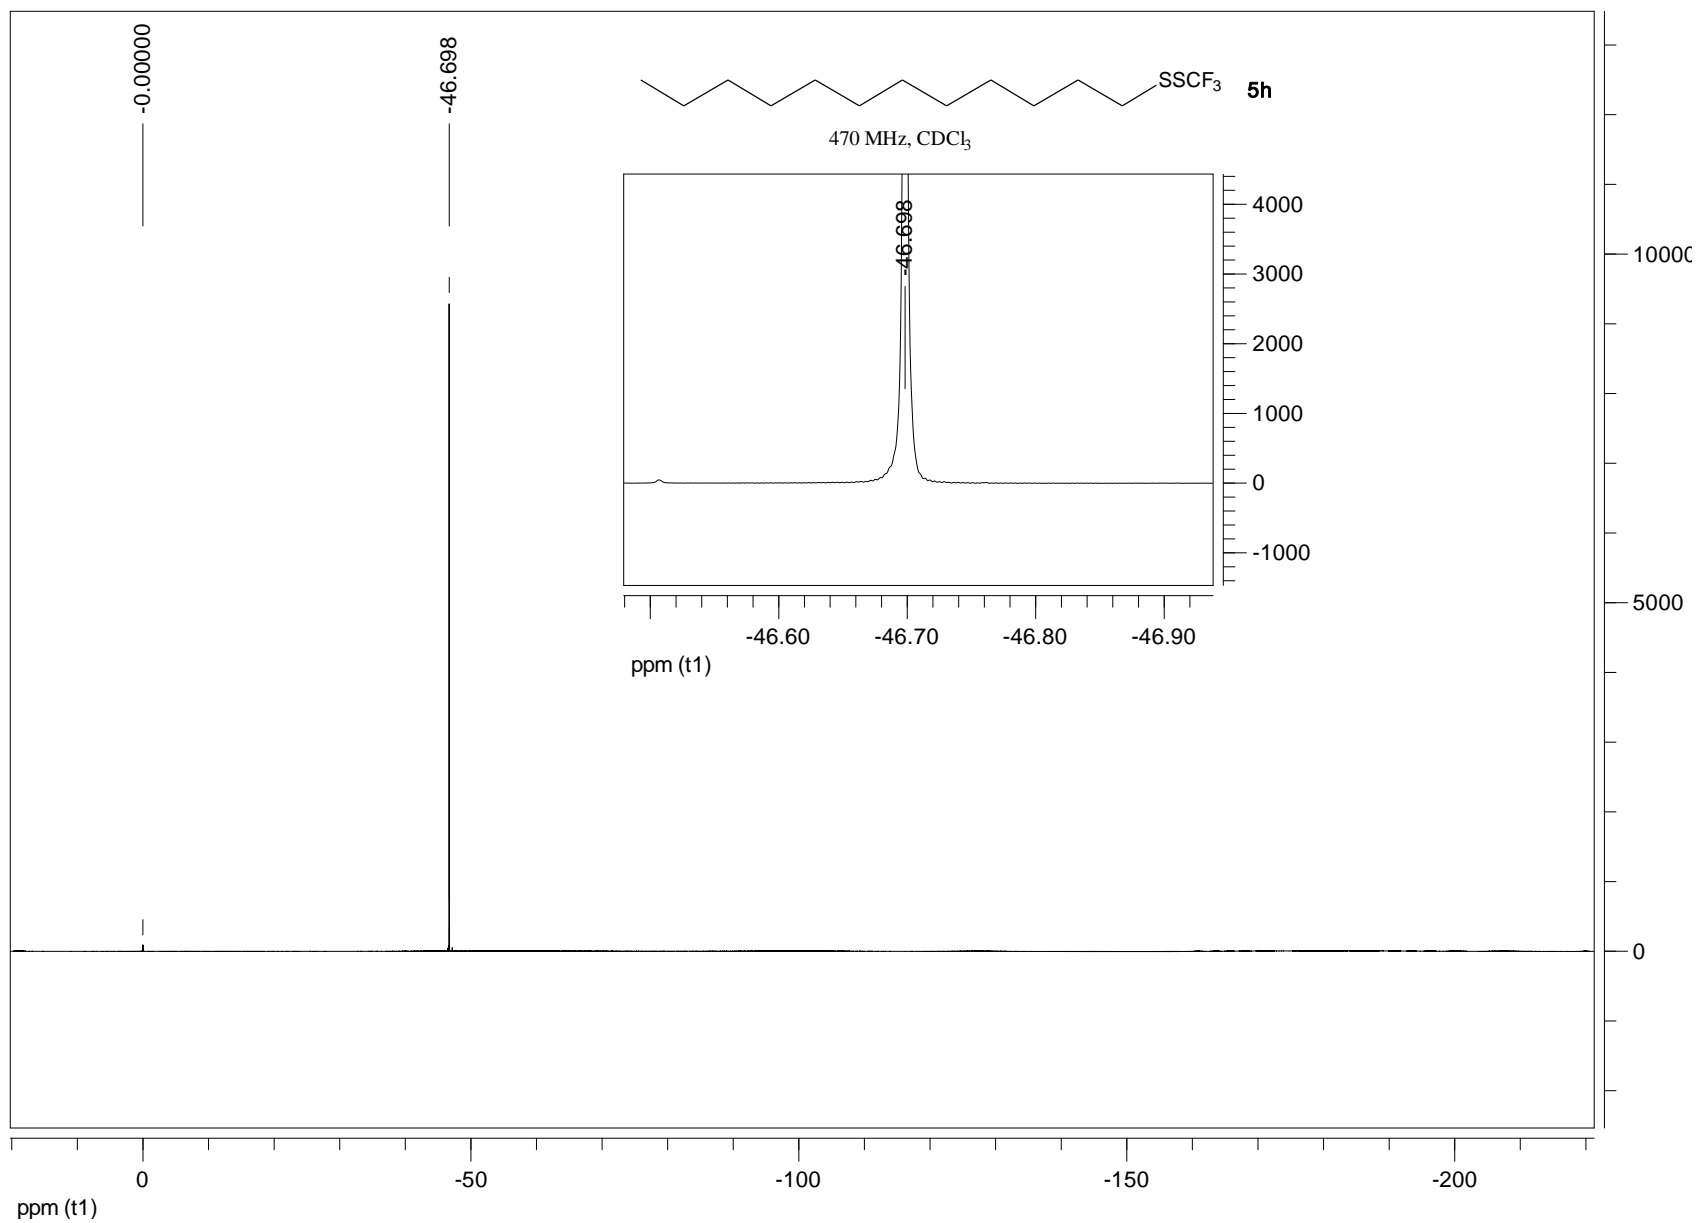

S83

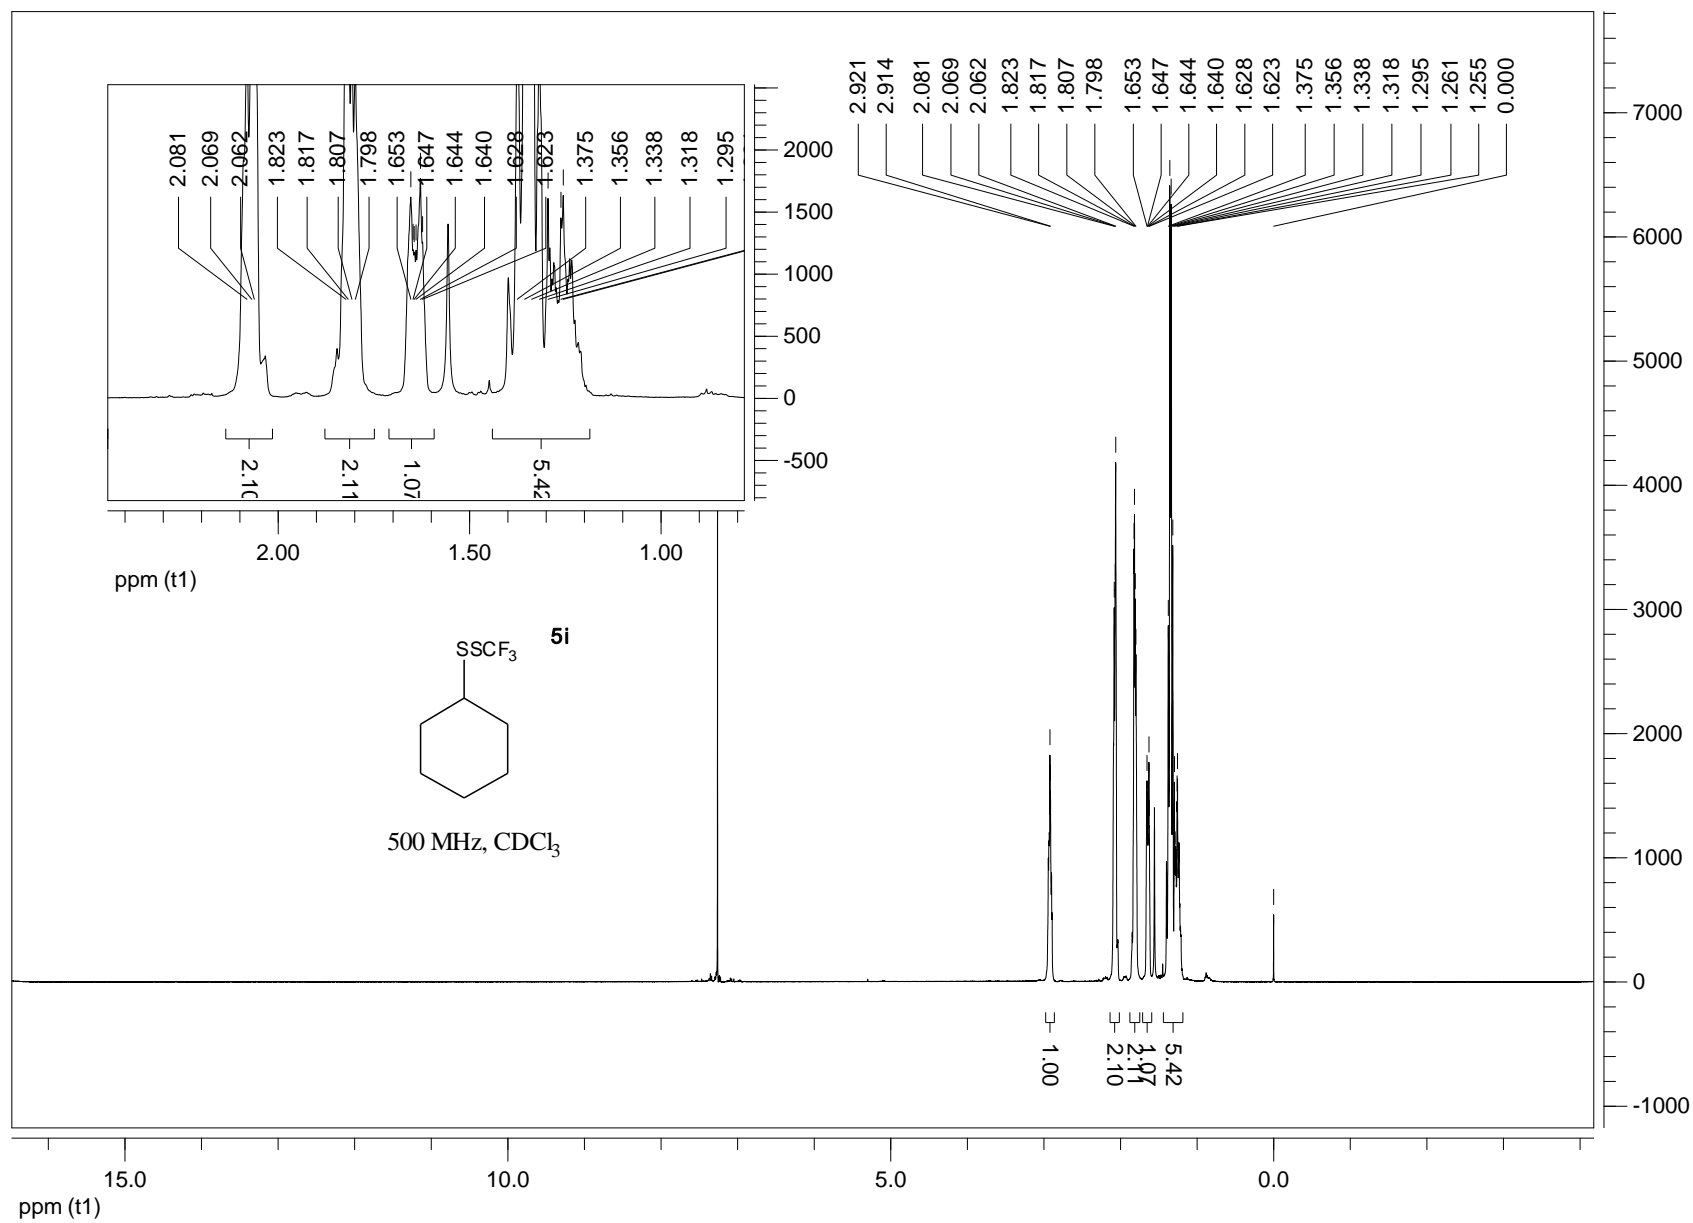



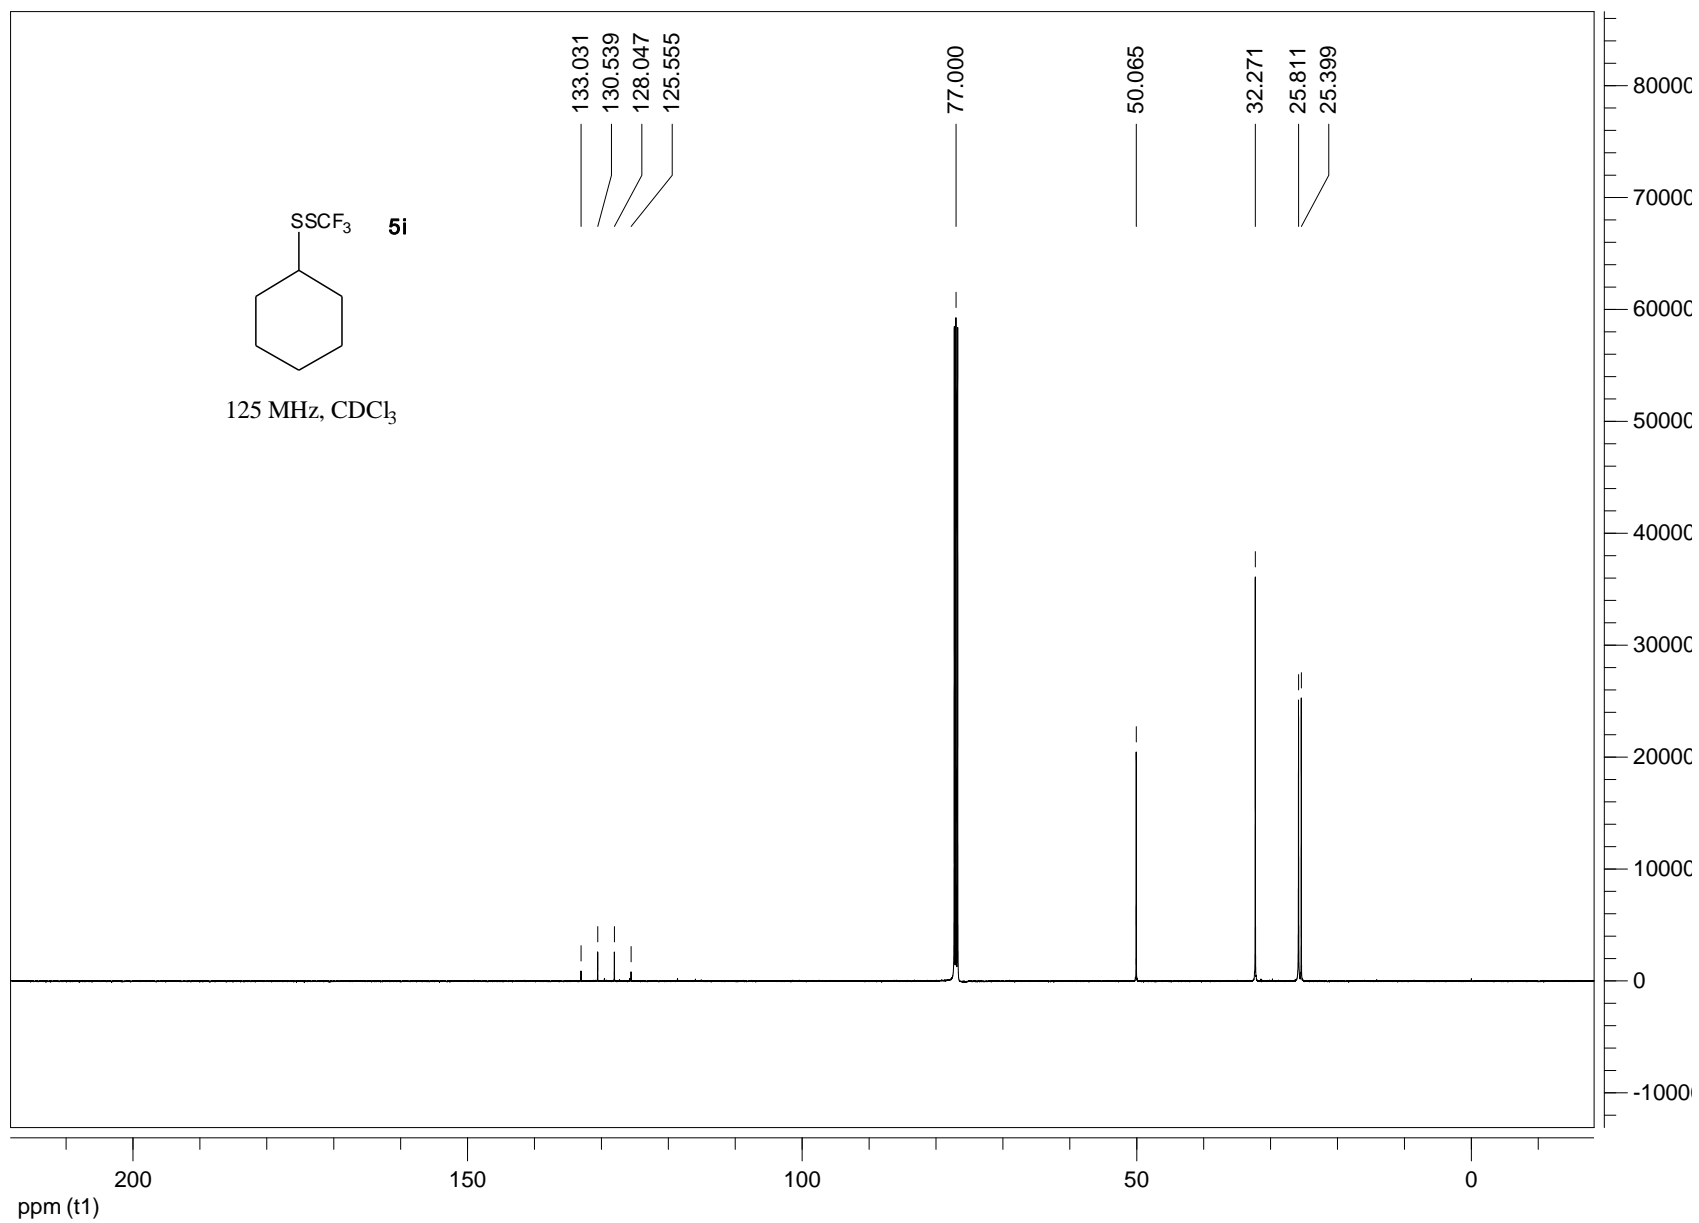

S85

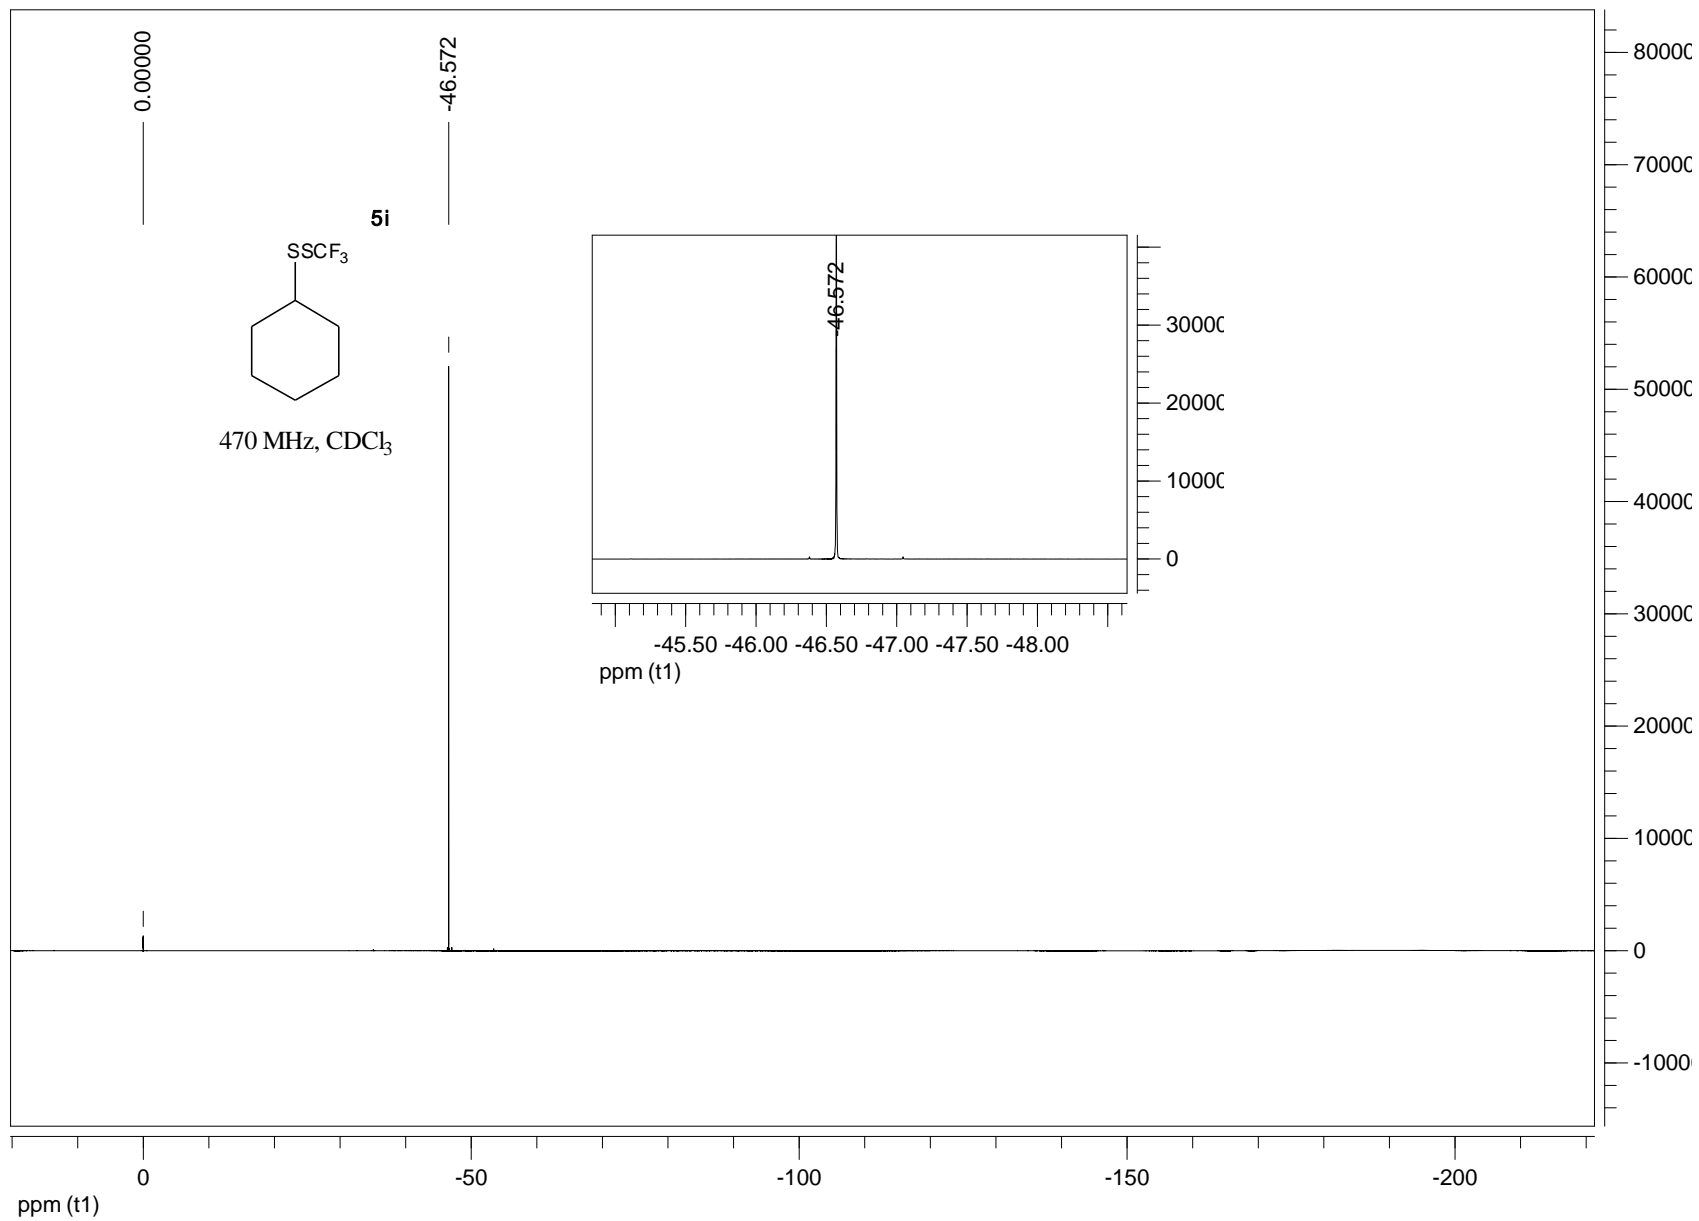

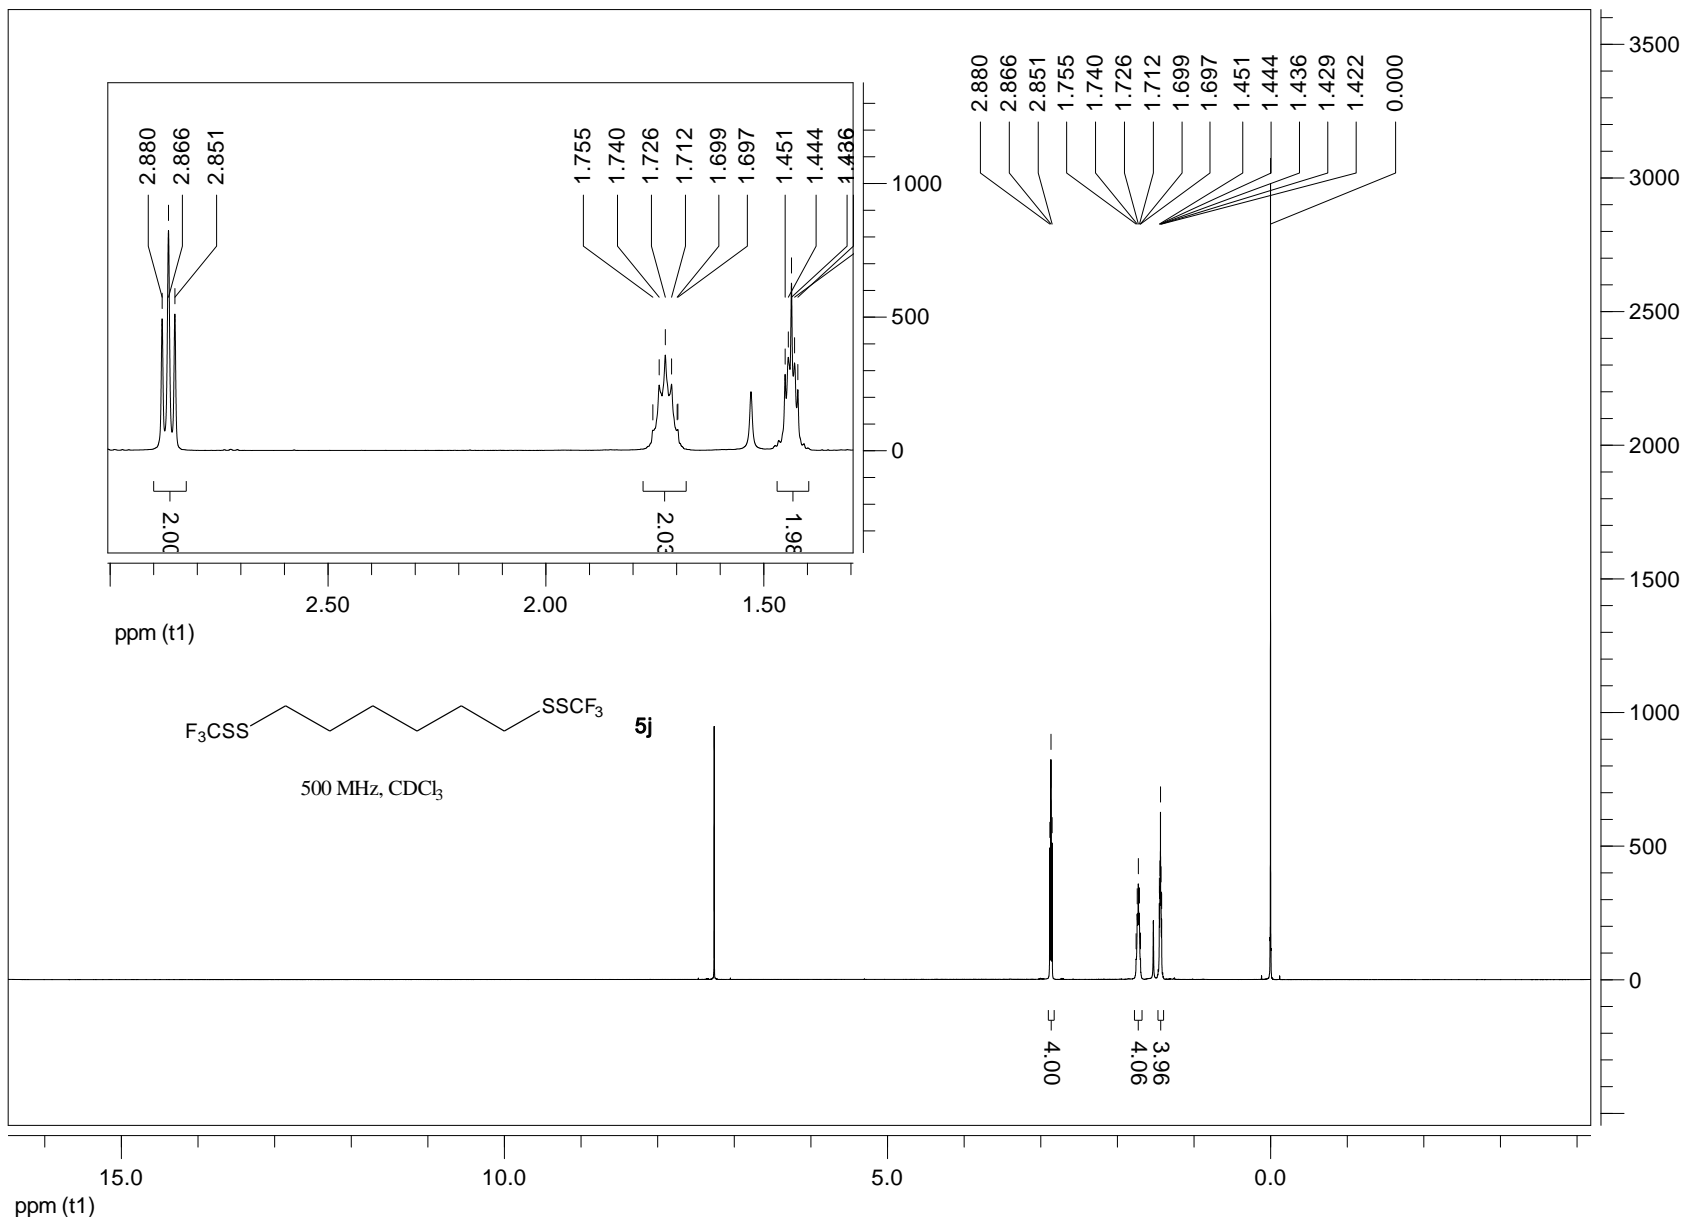

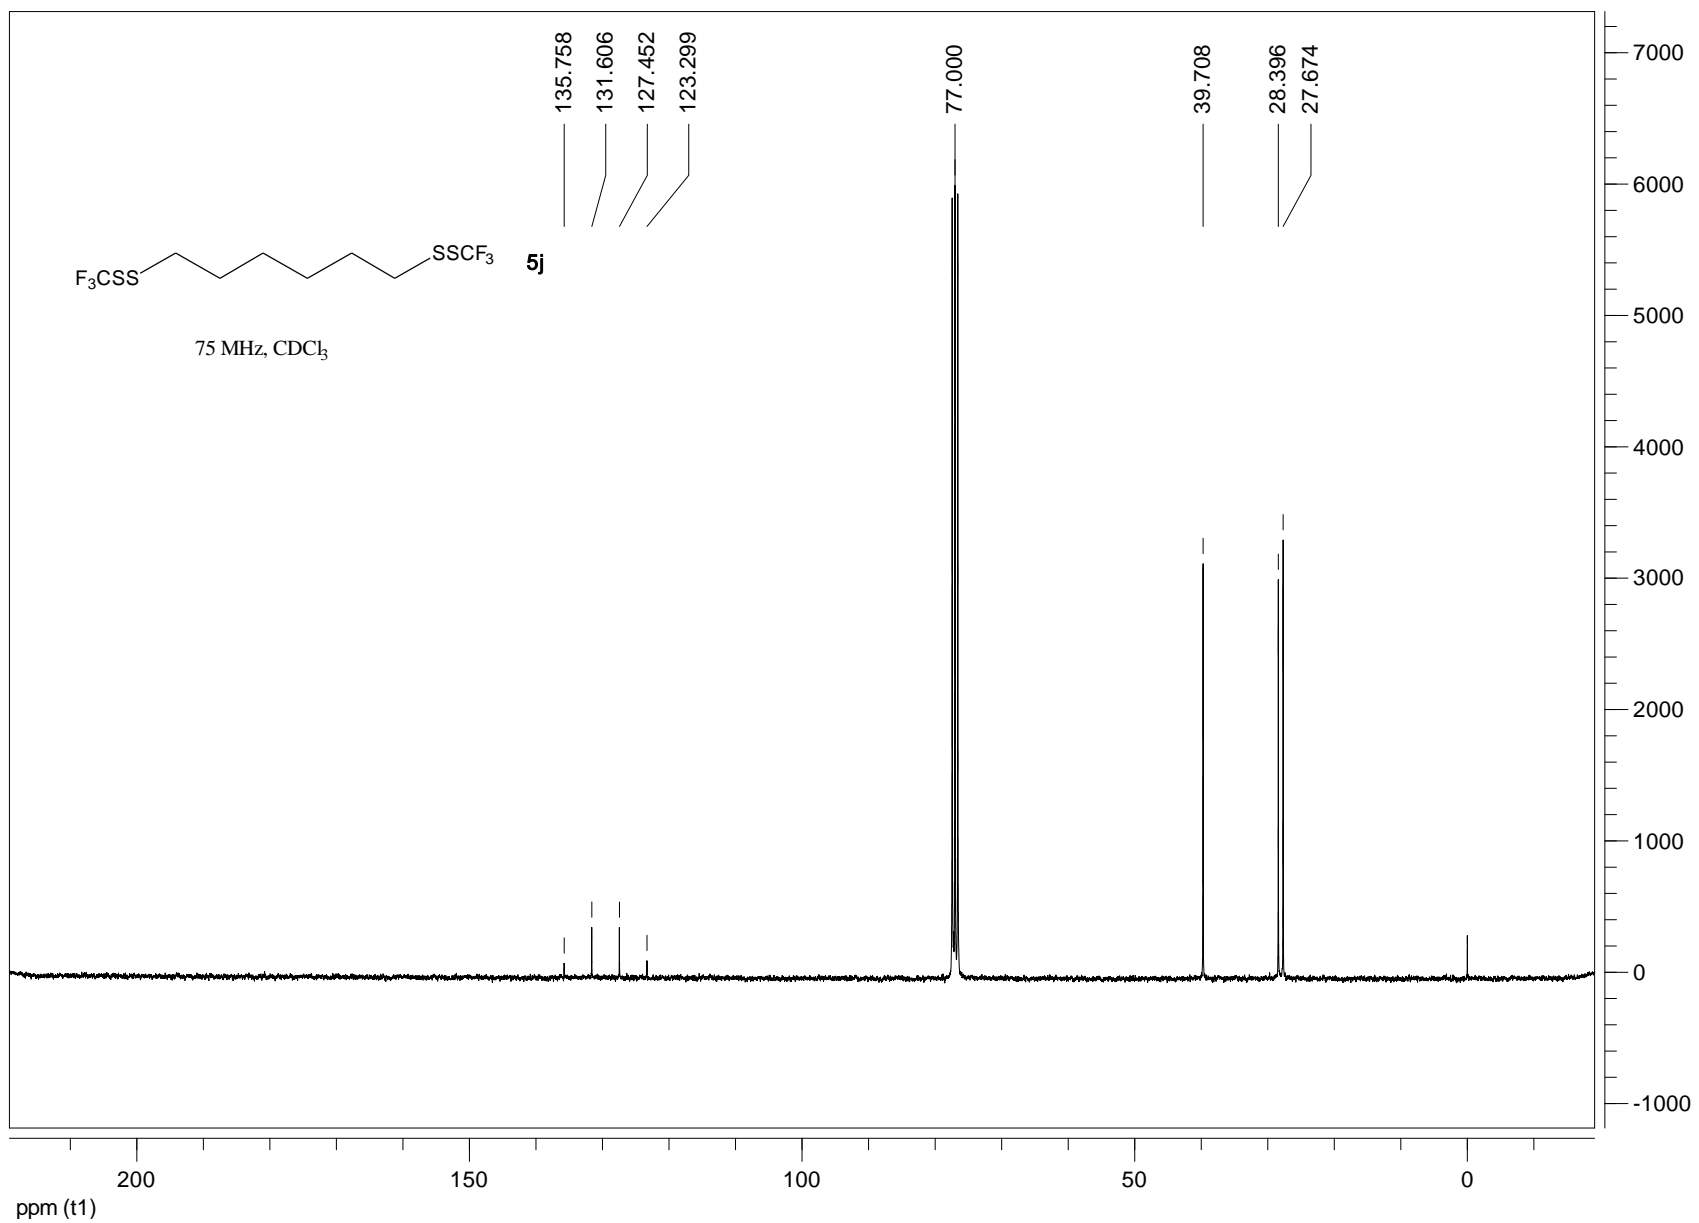

S88

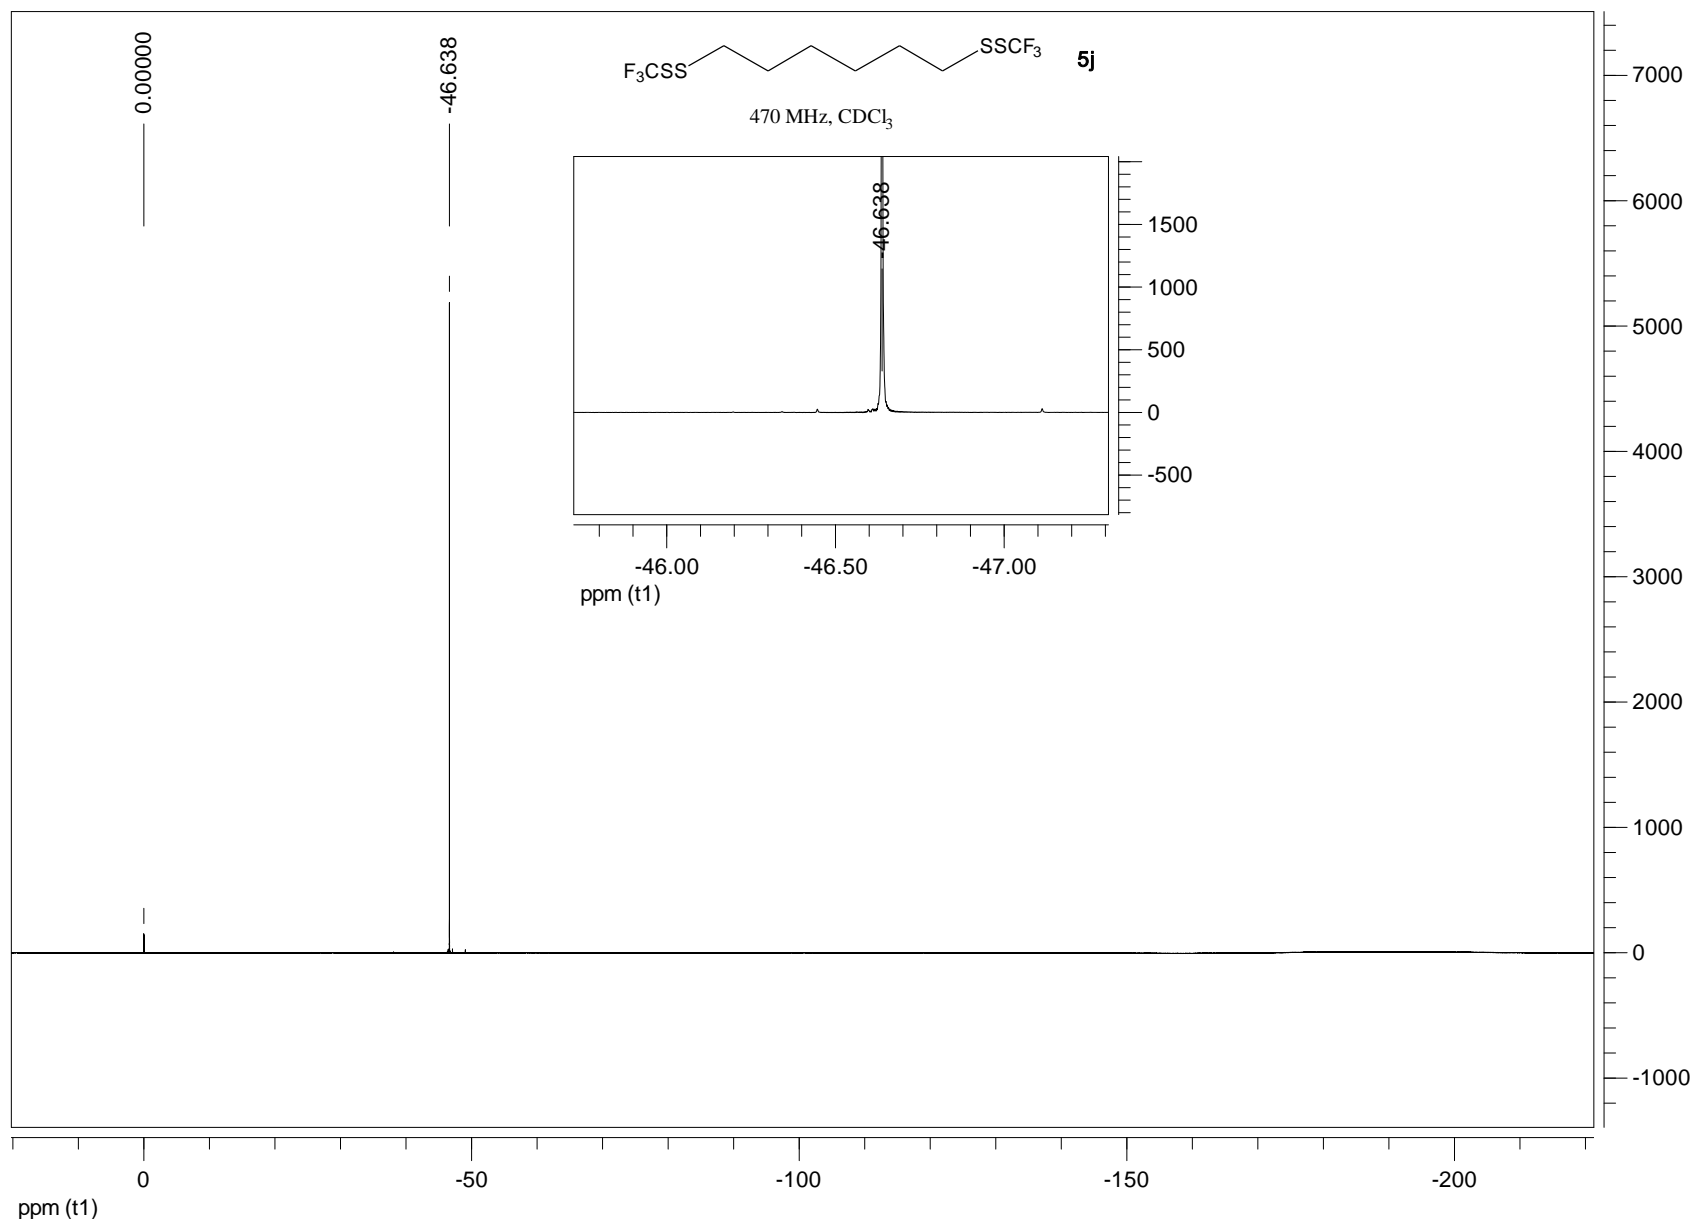

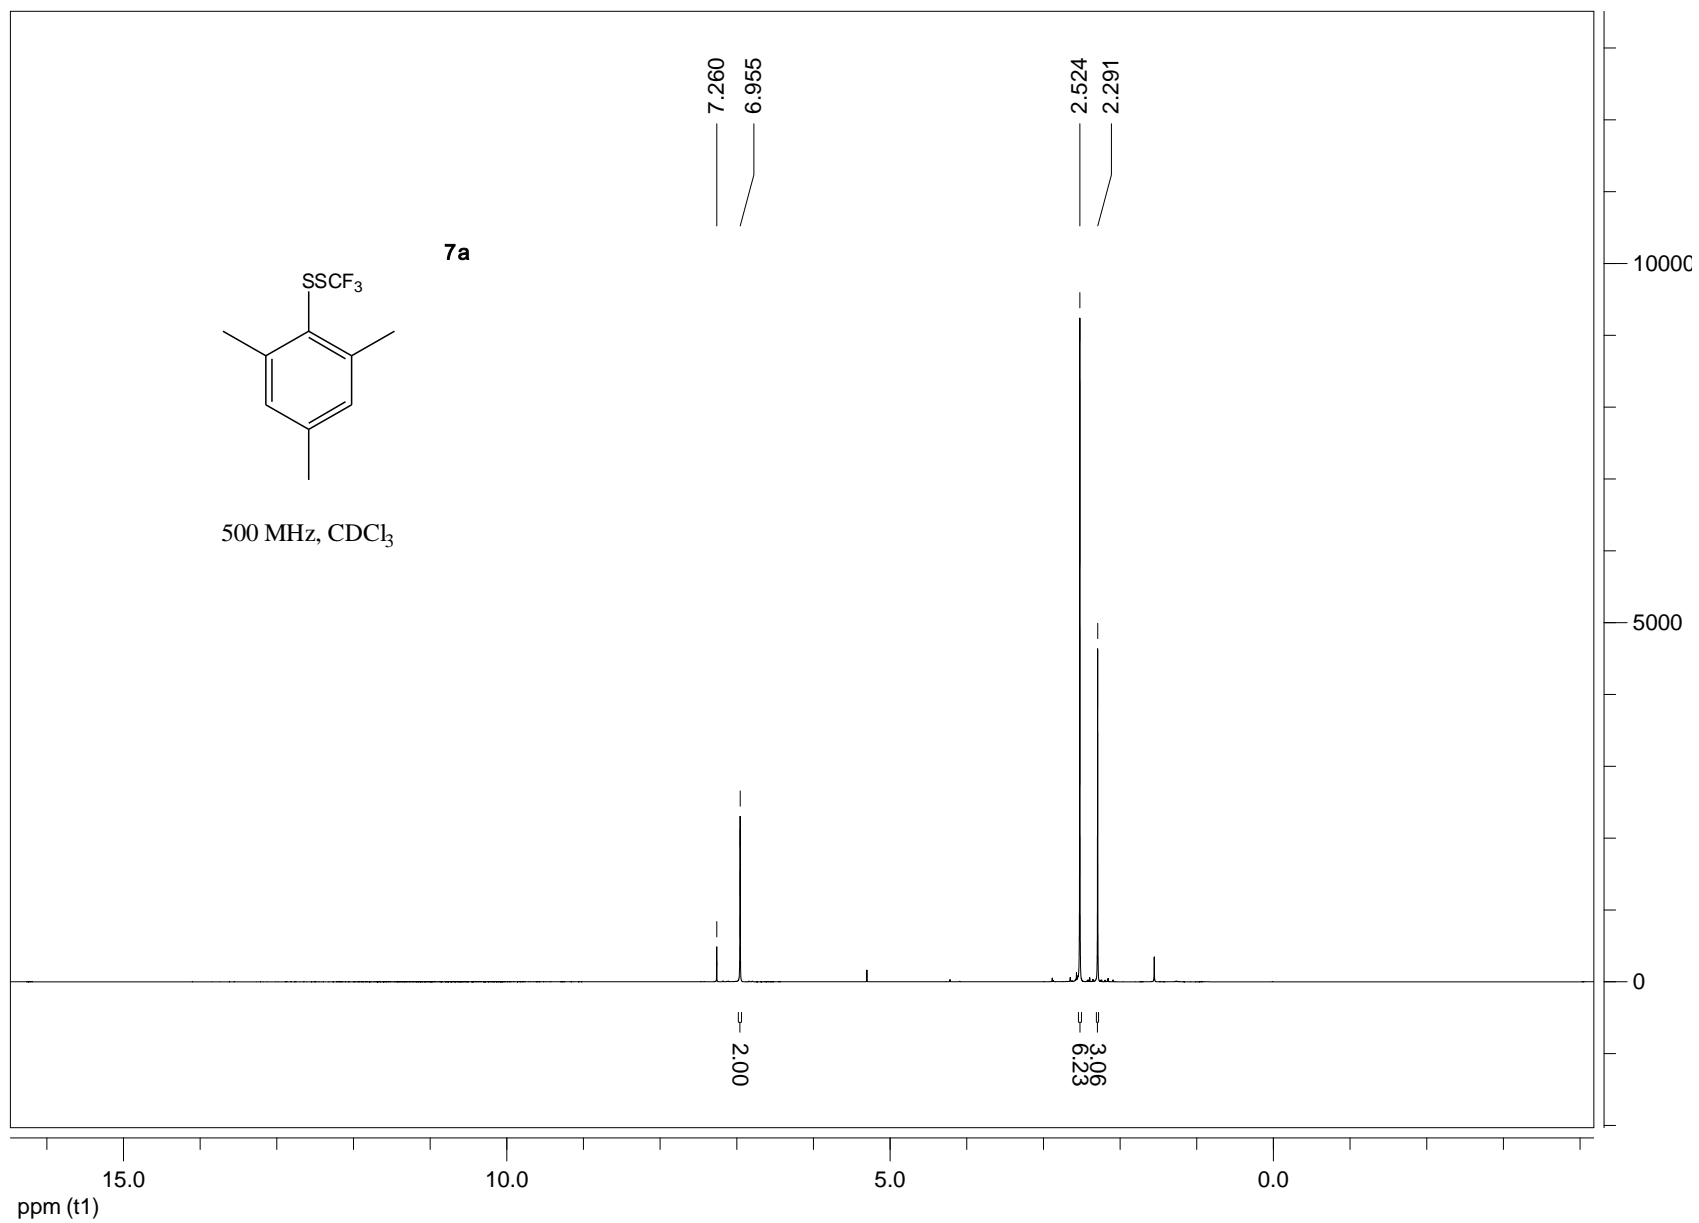

S90

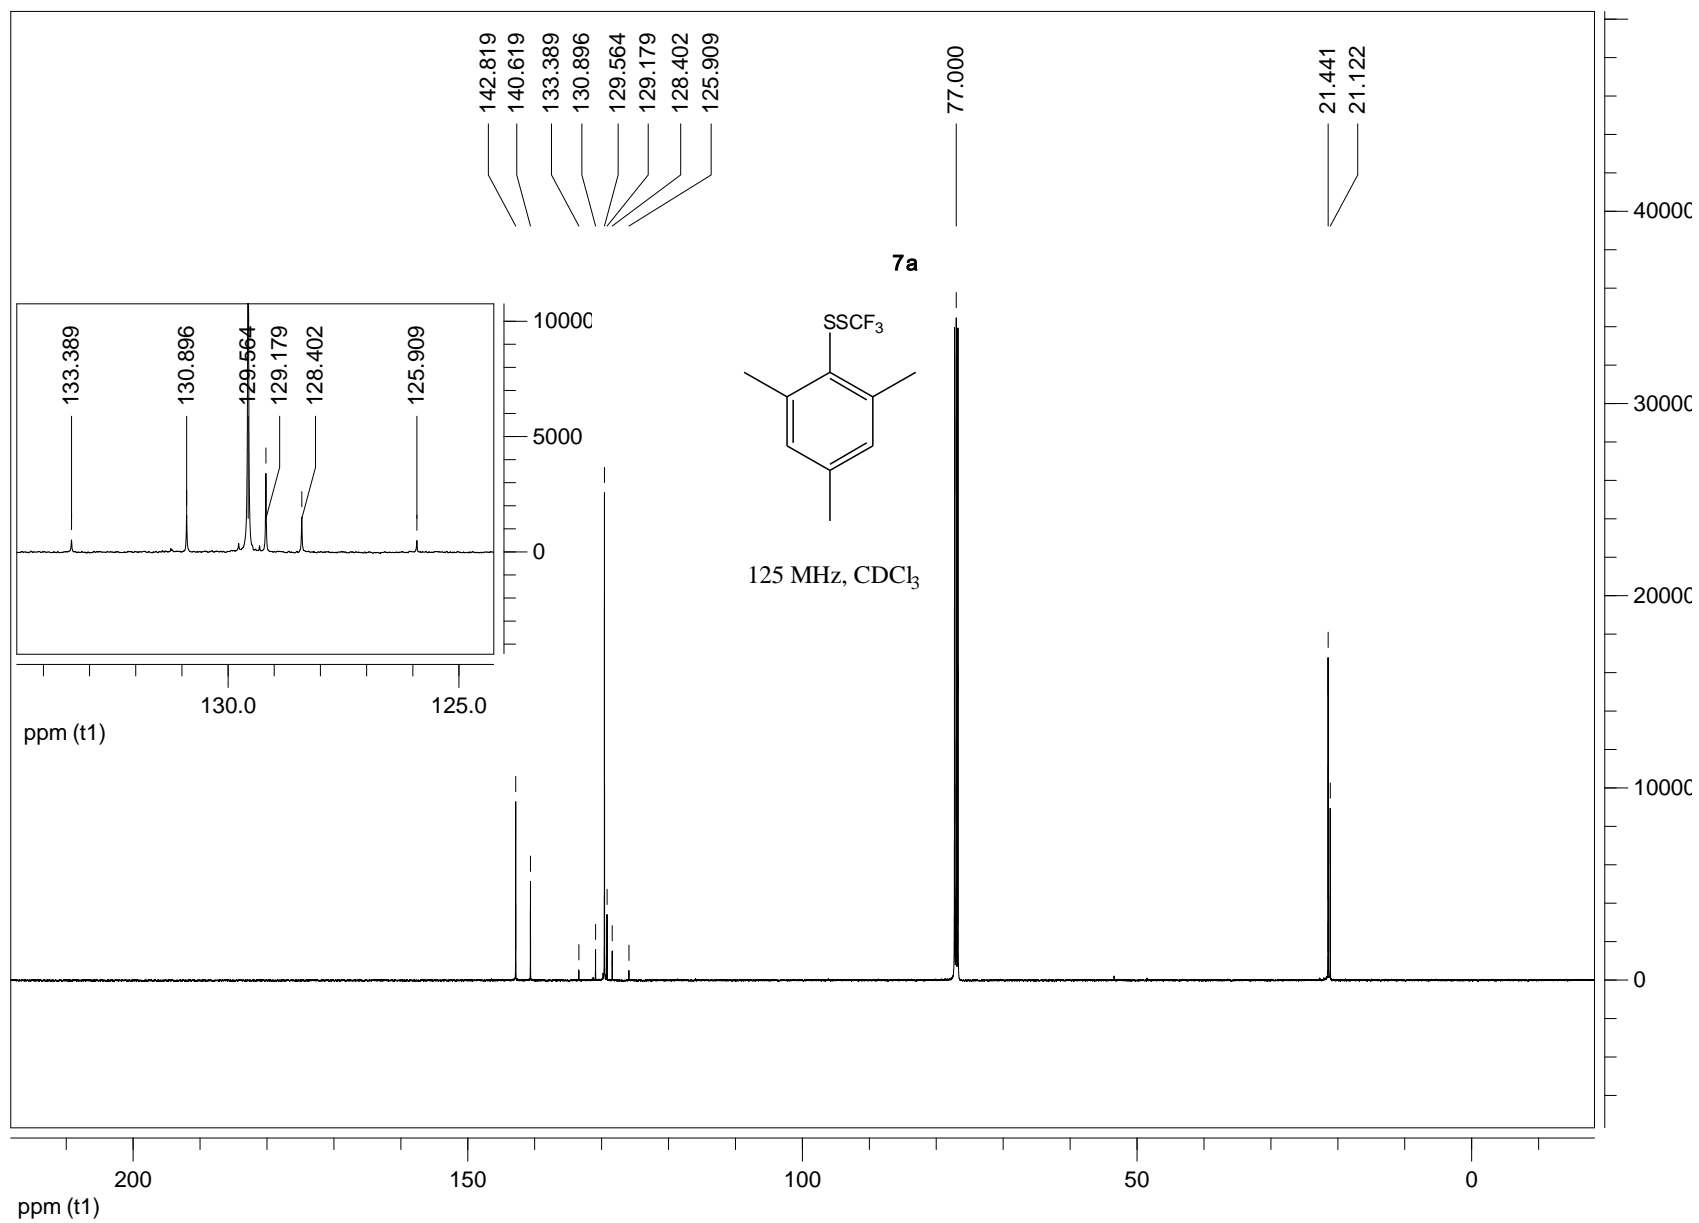

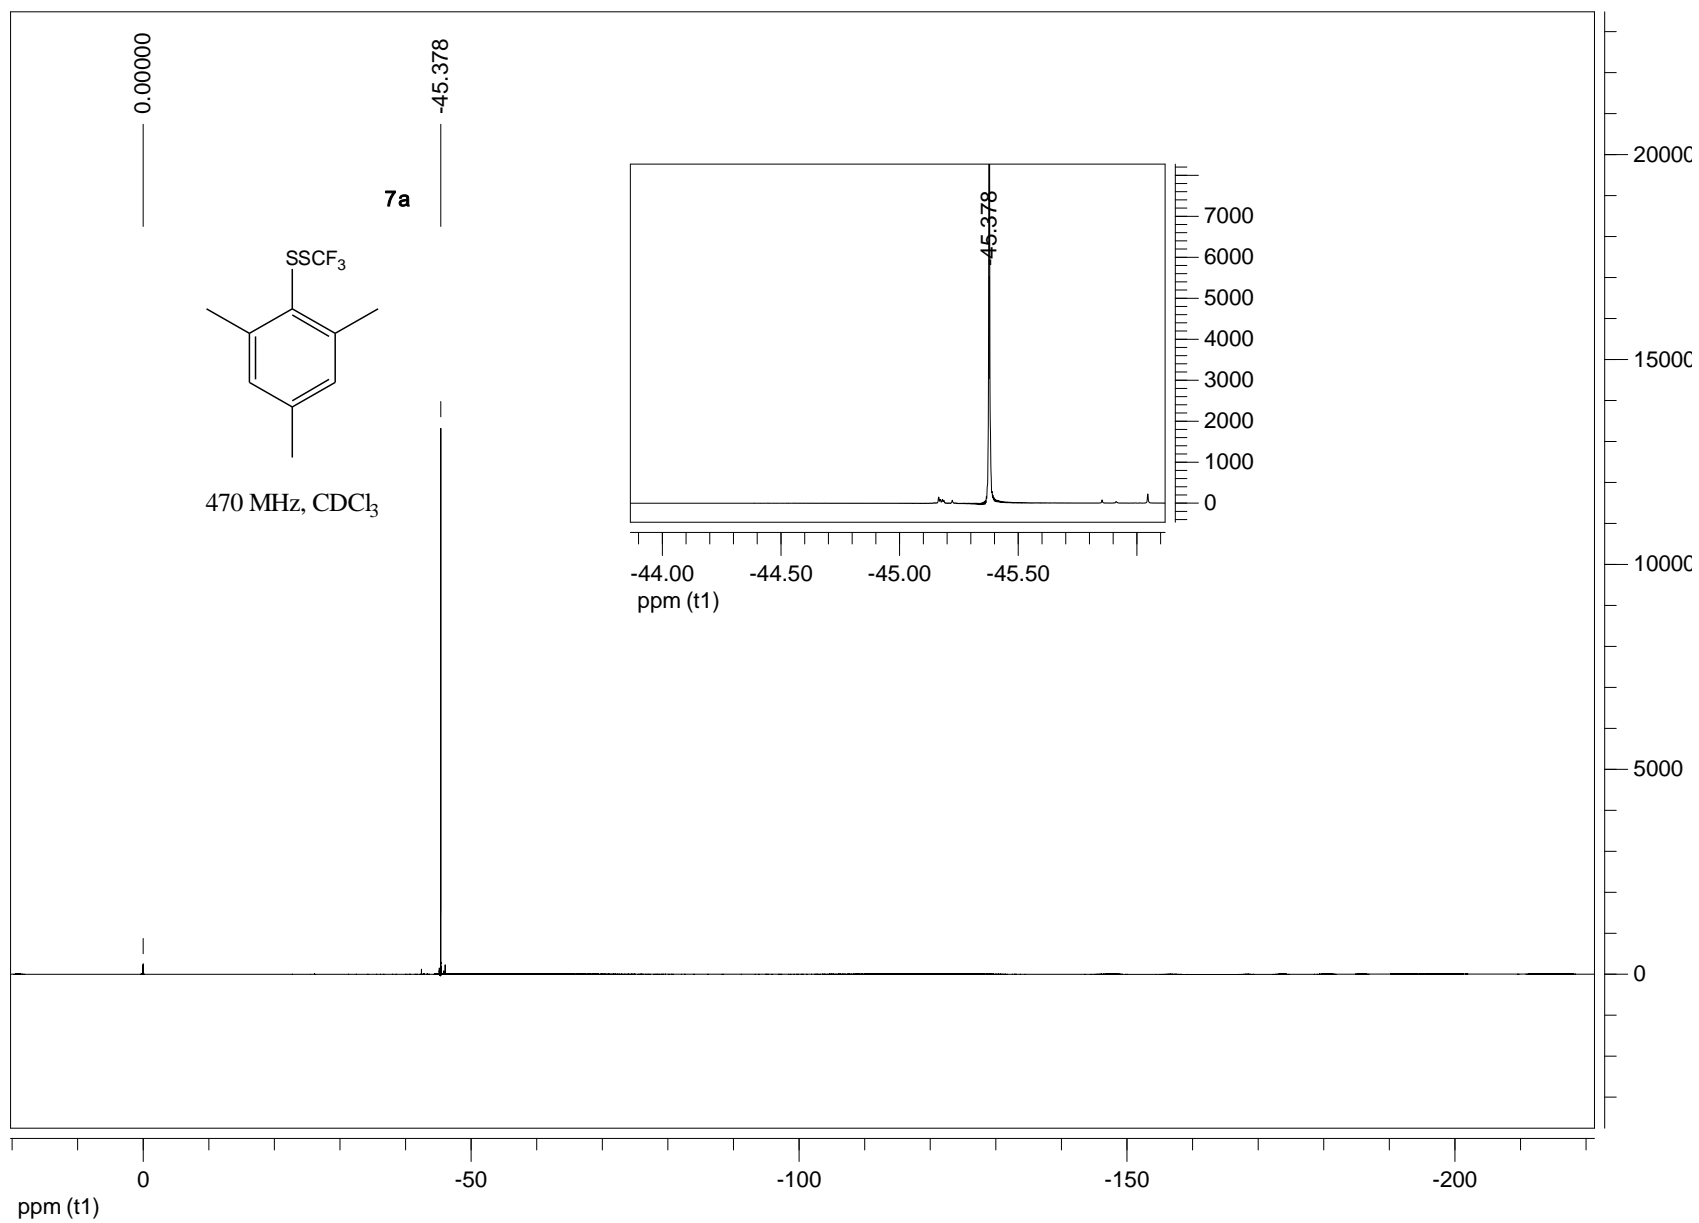



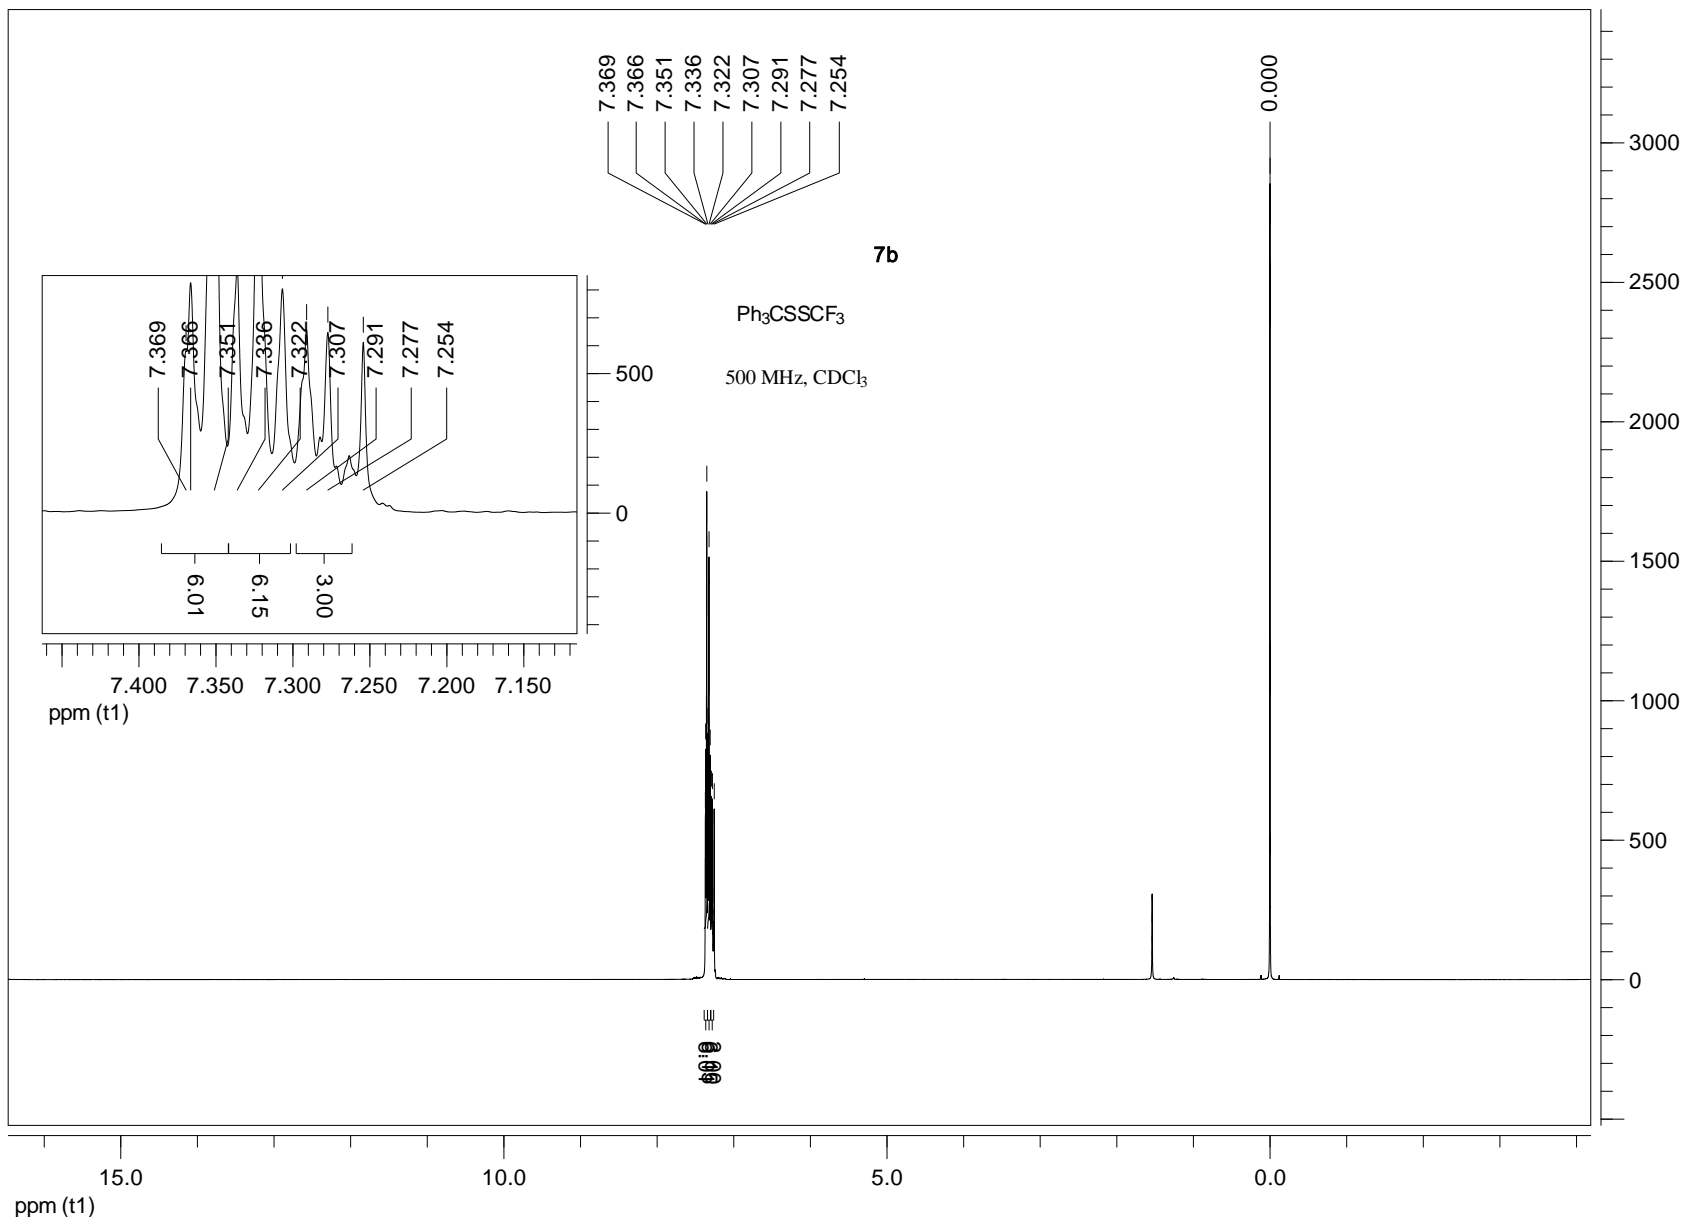

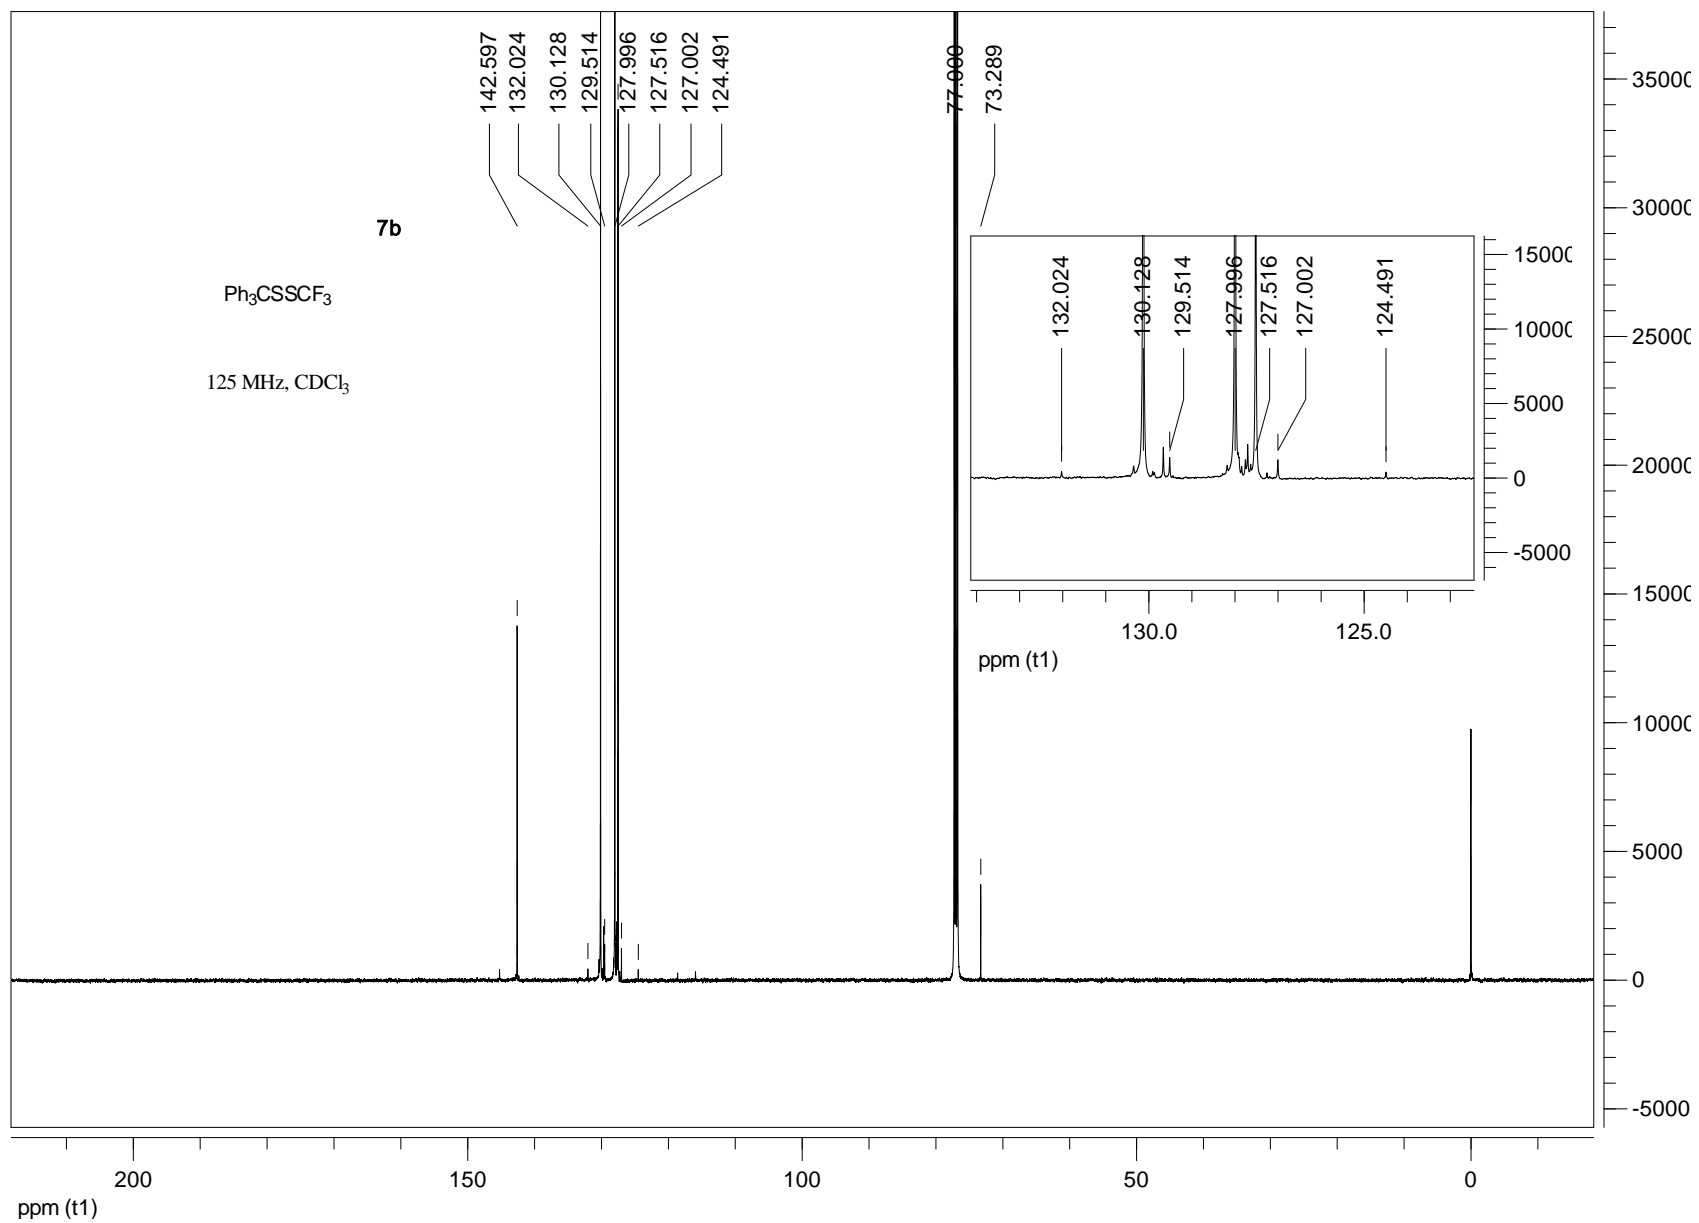

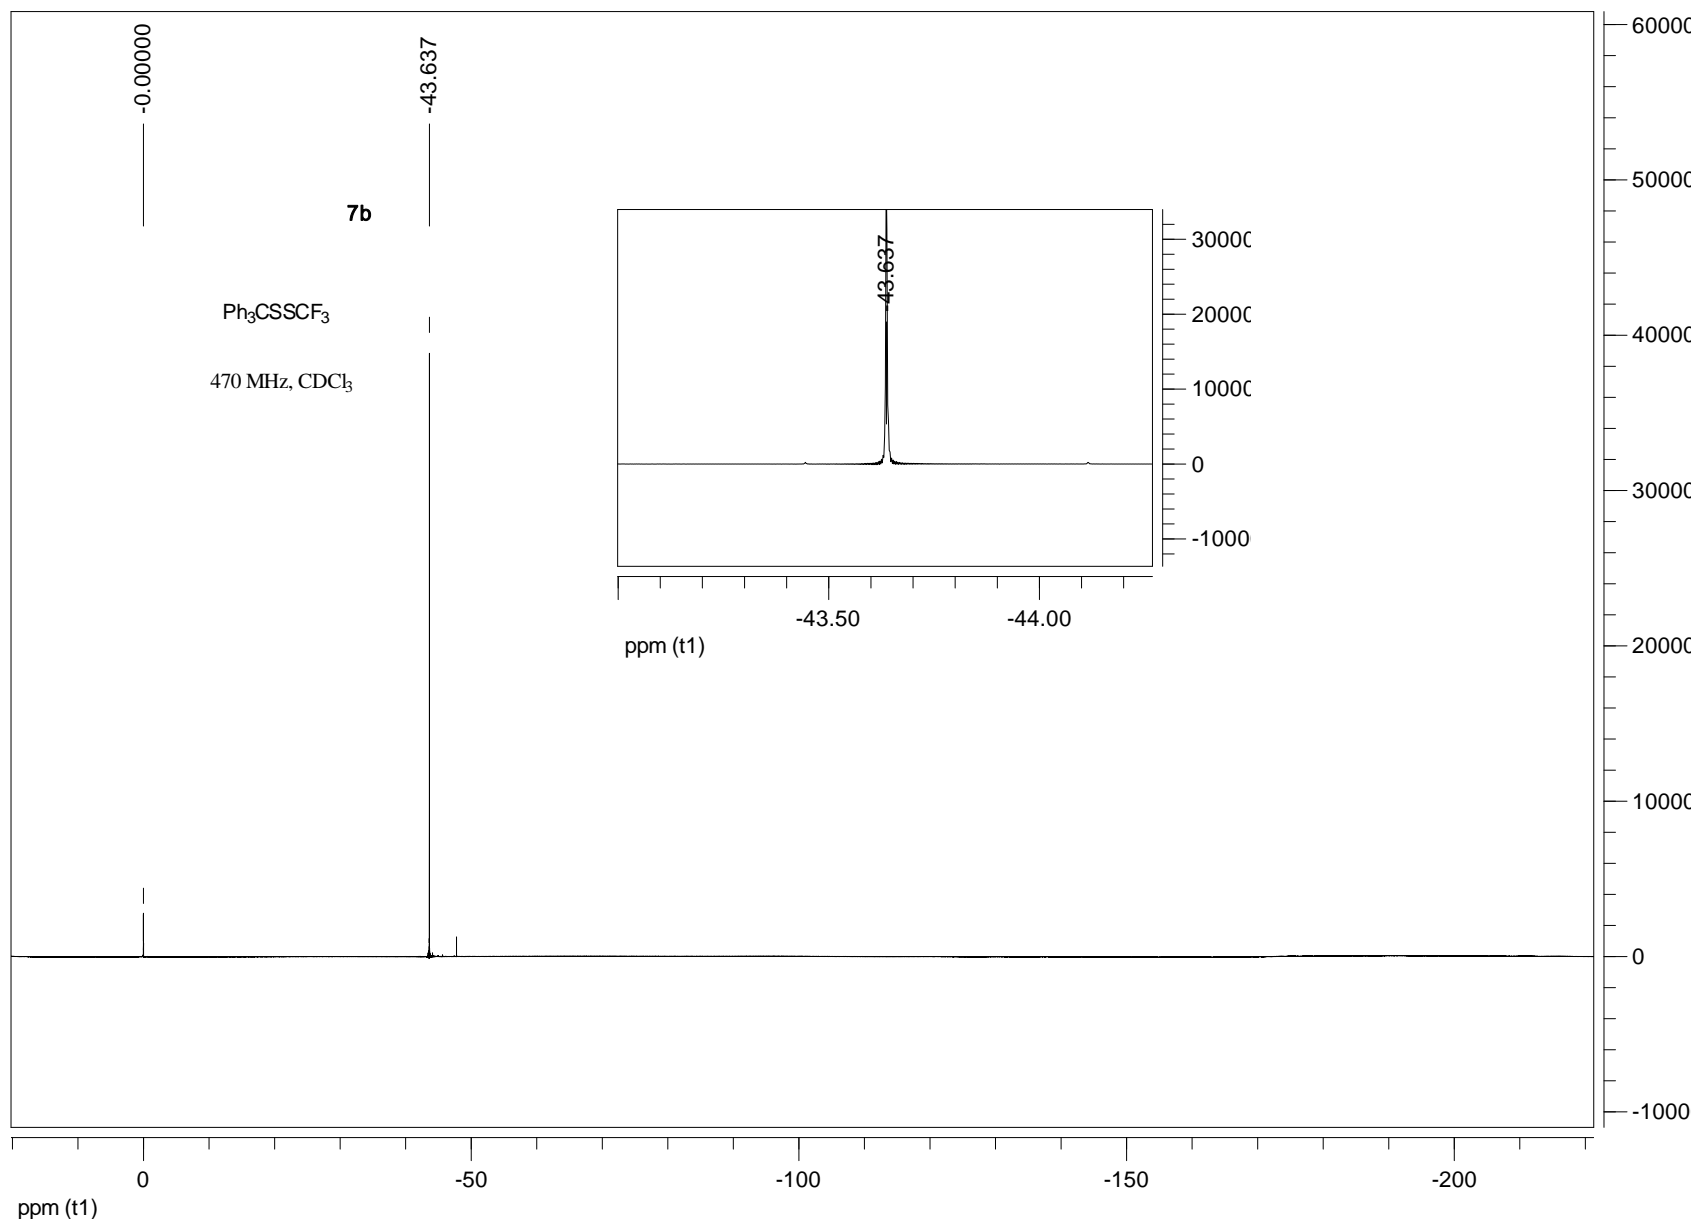

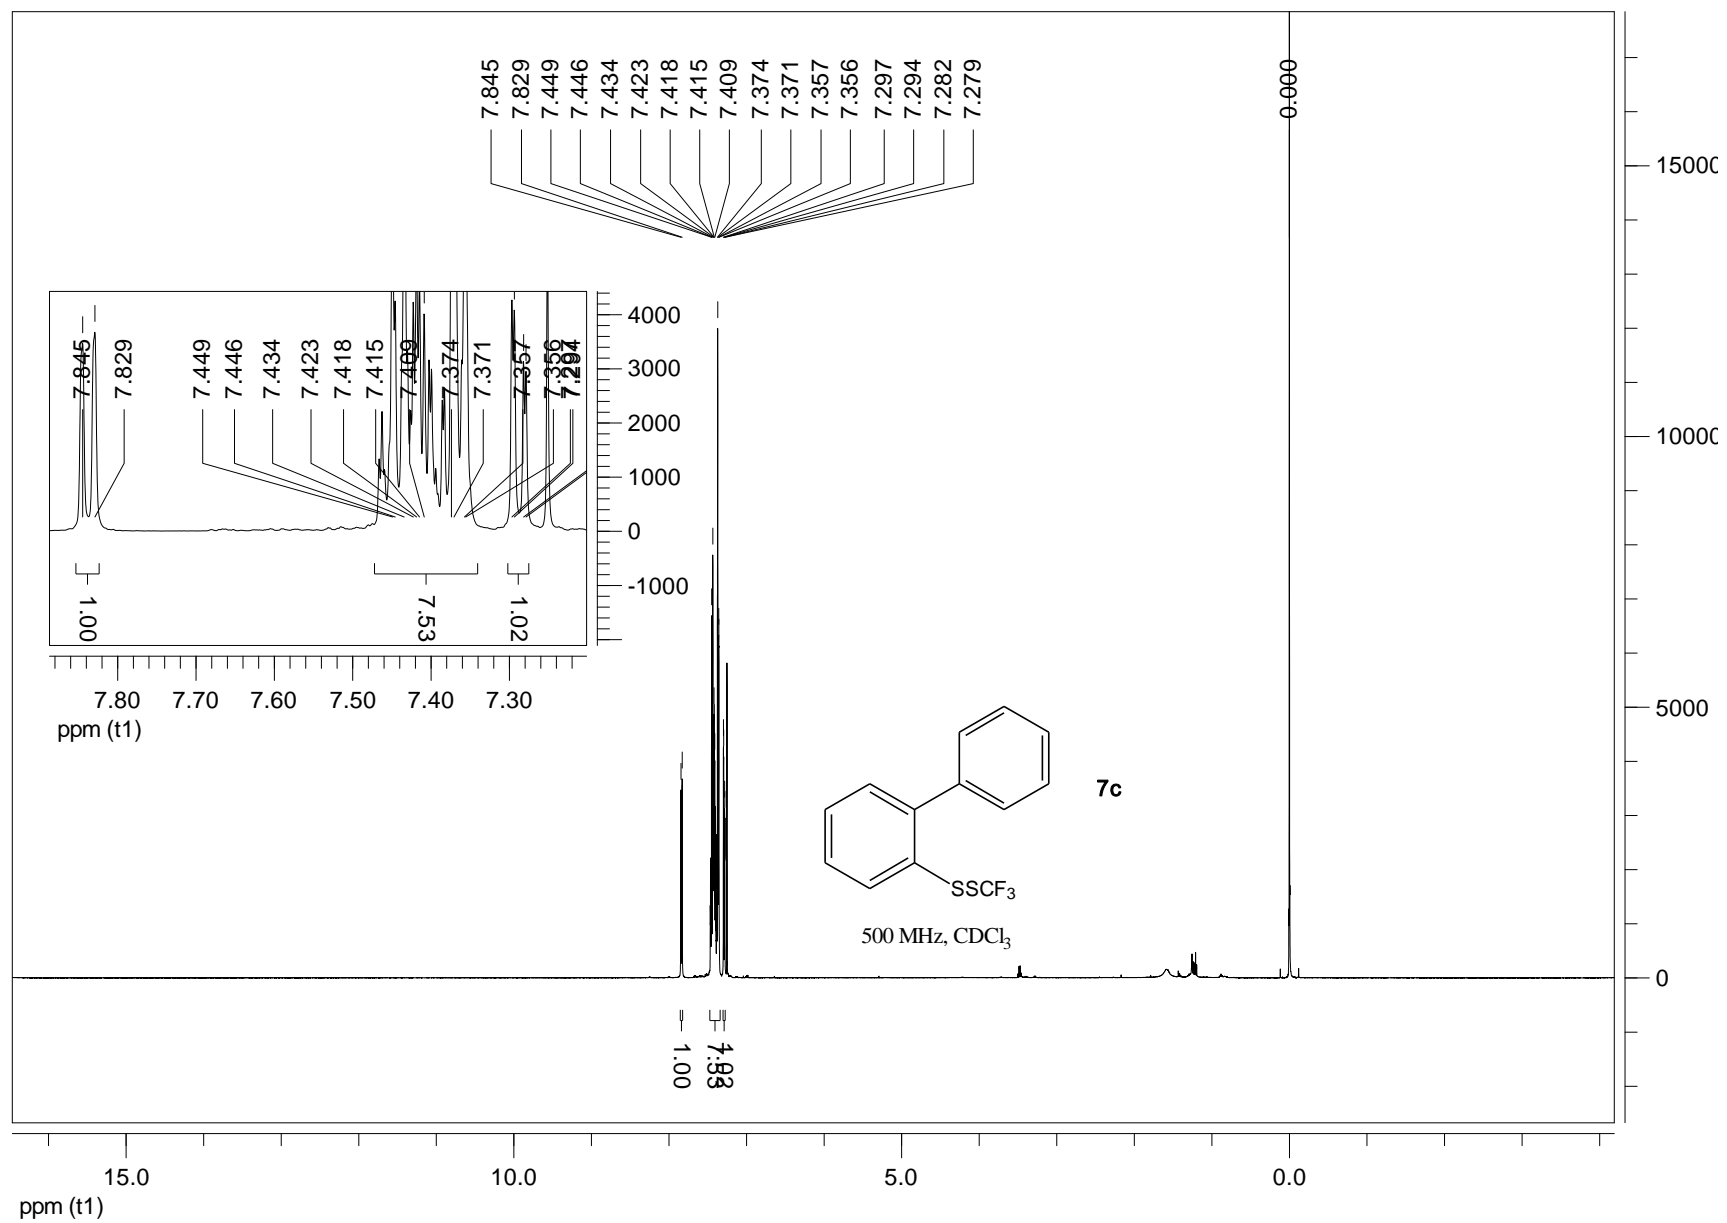

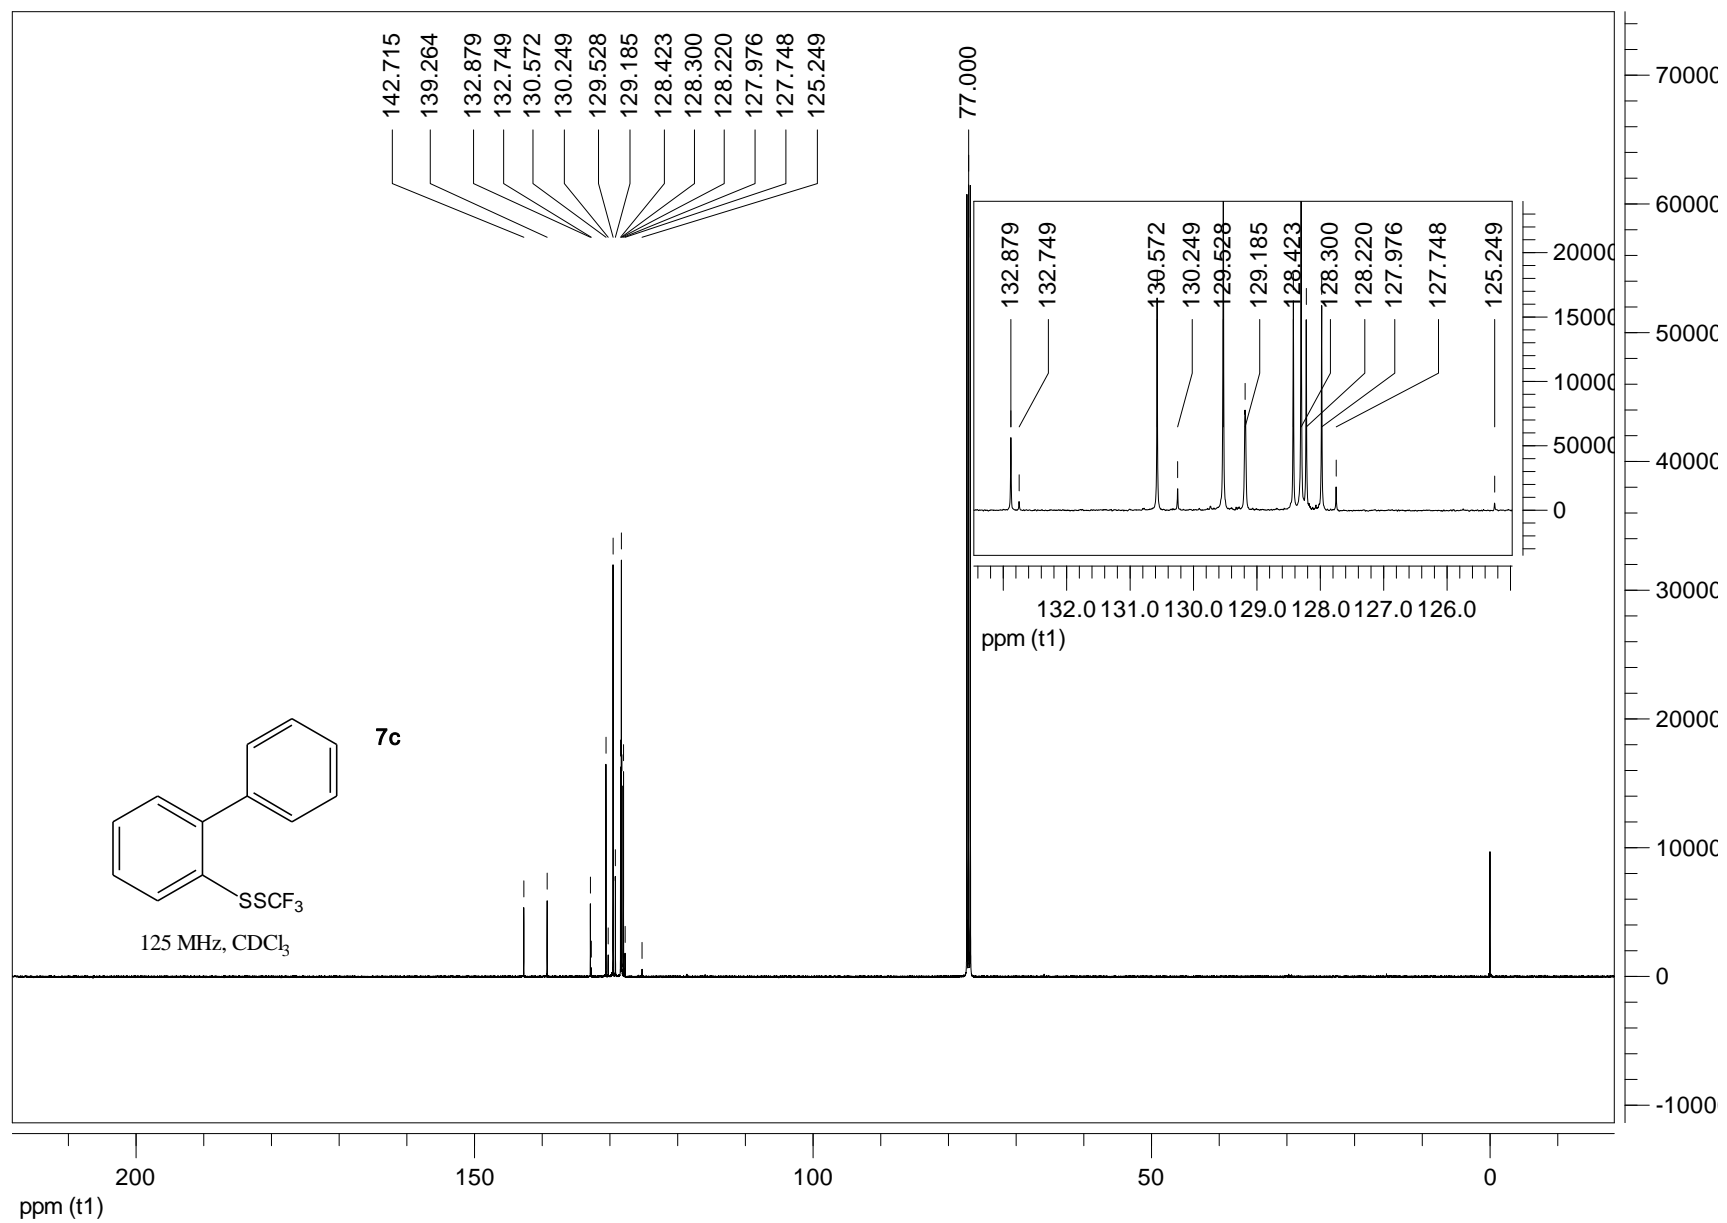

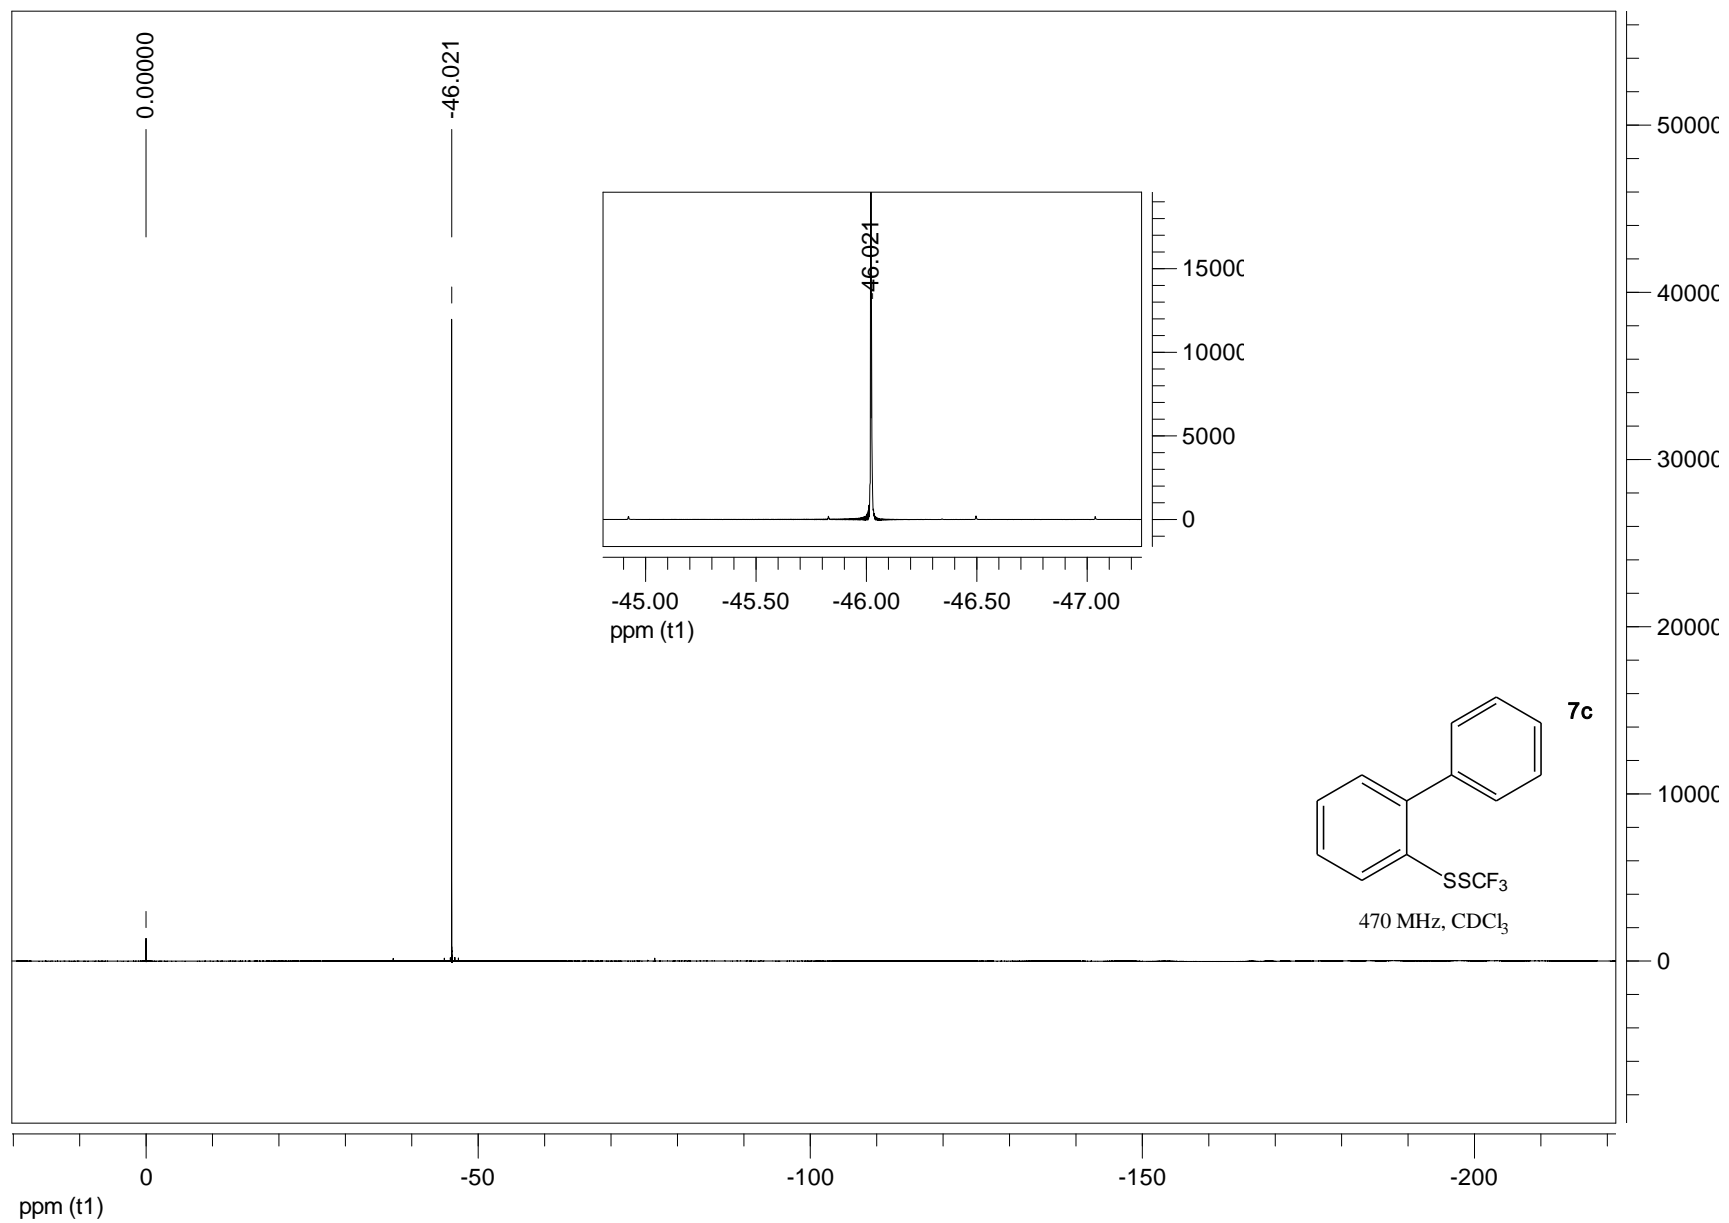

S98

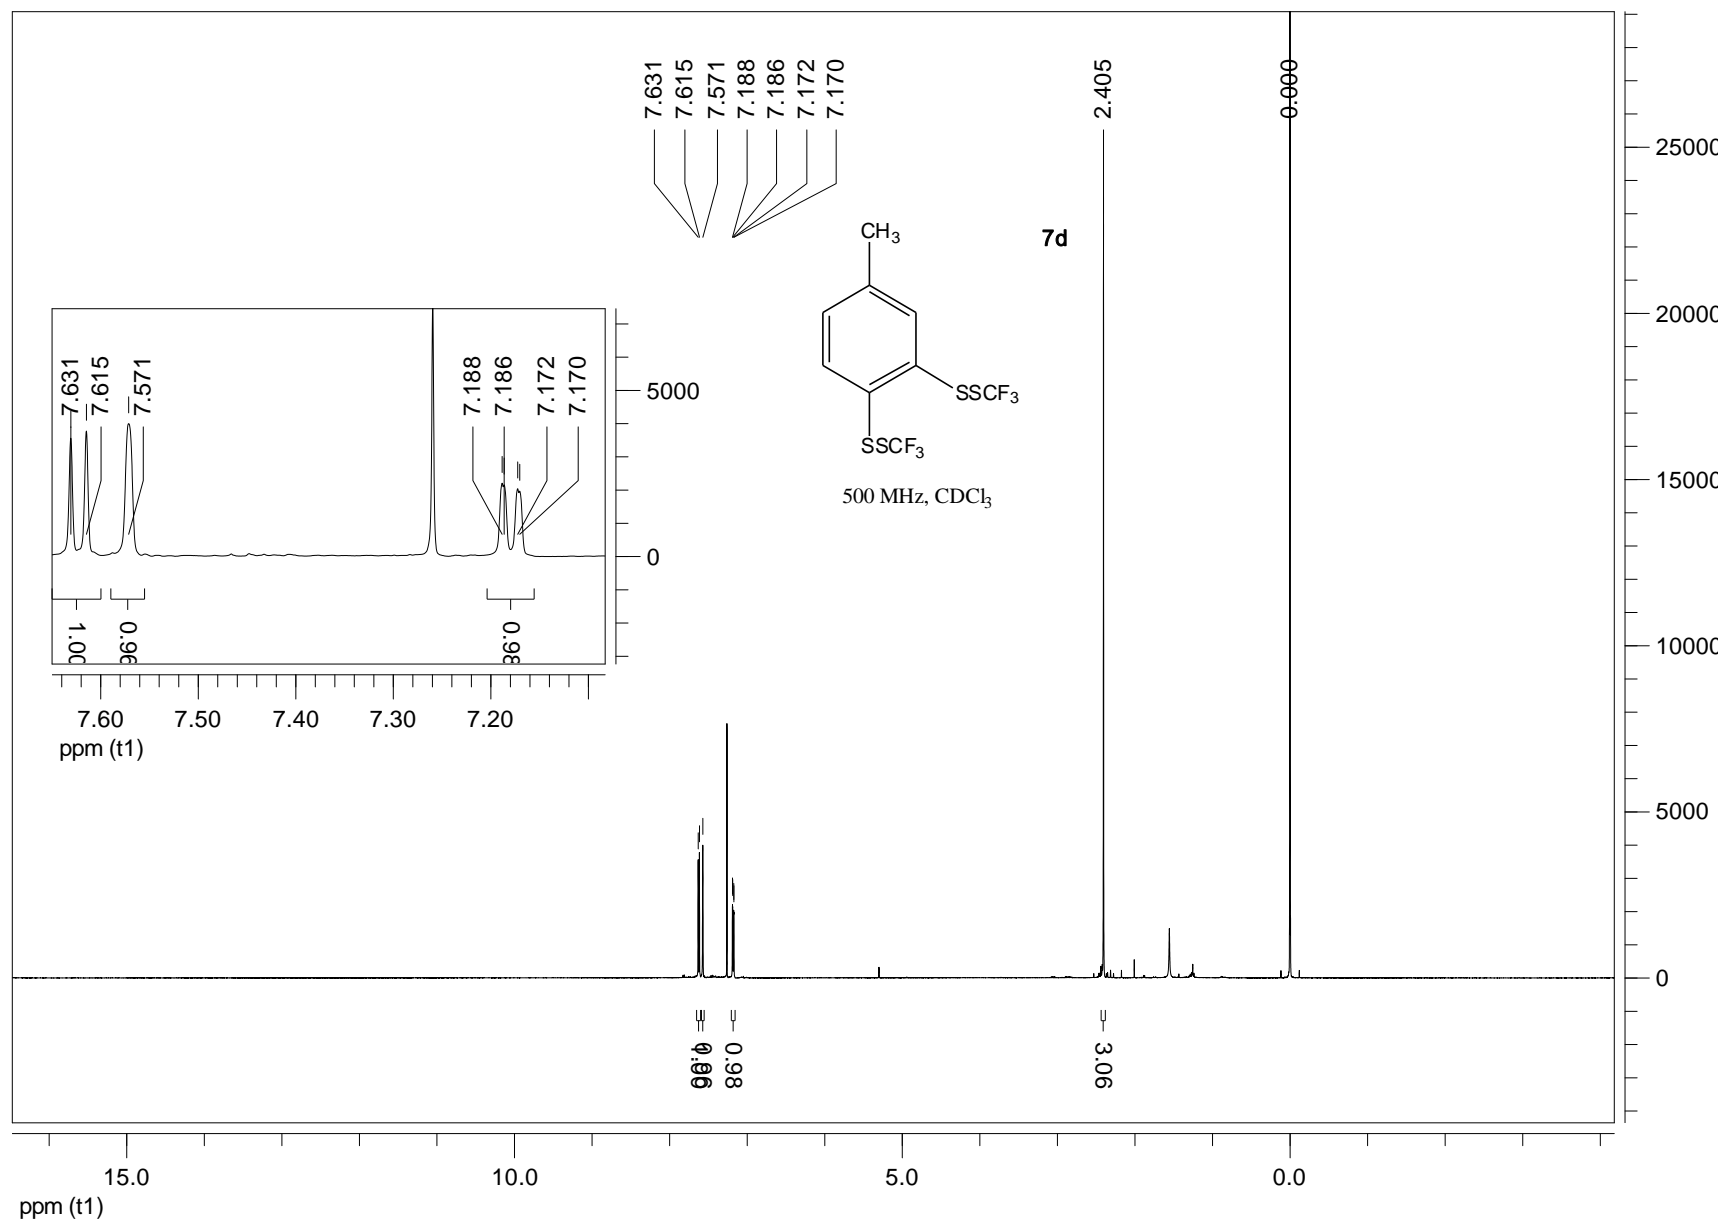

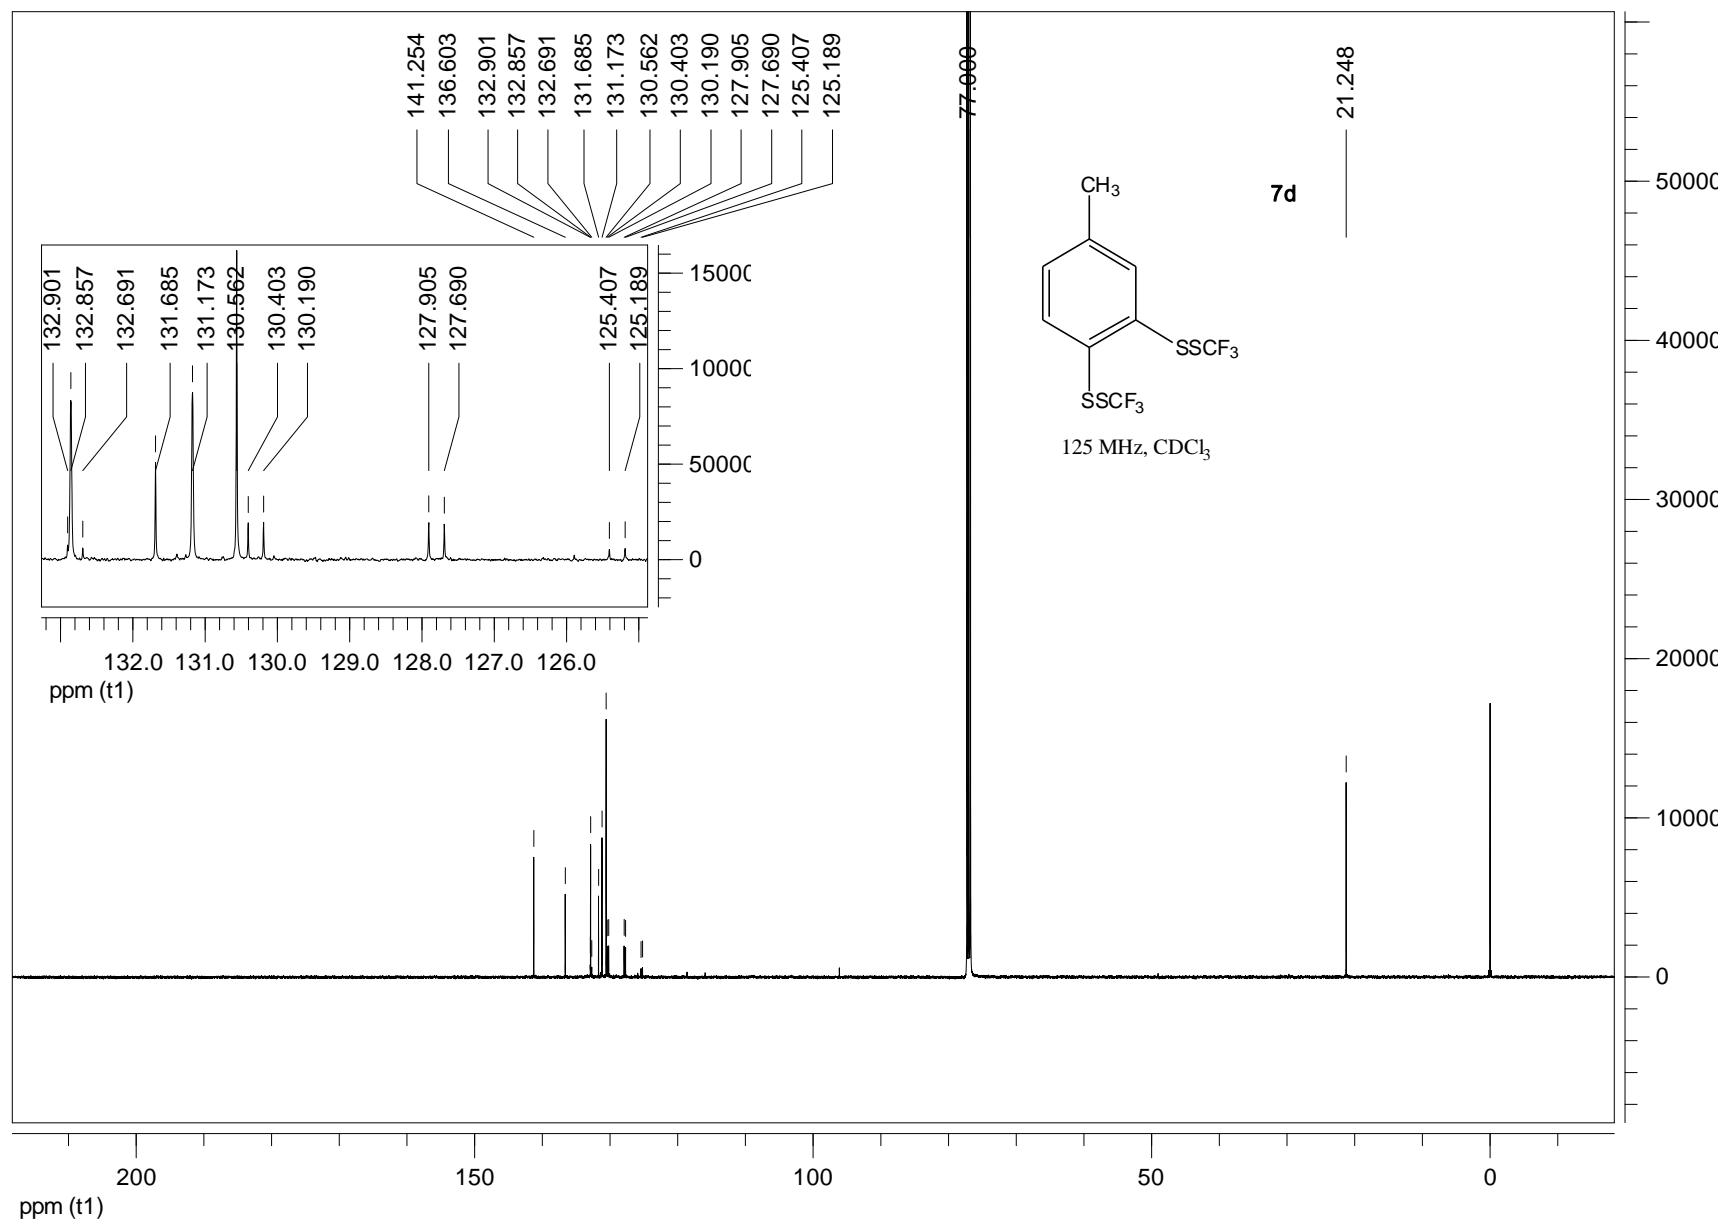



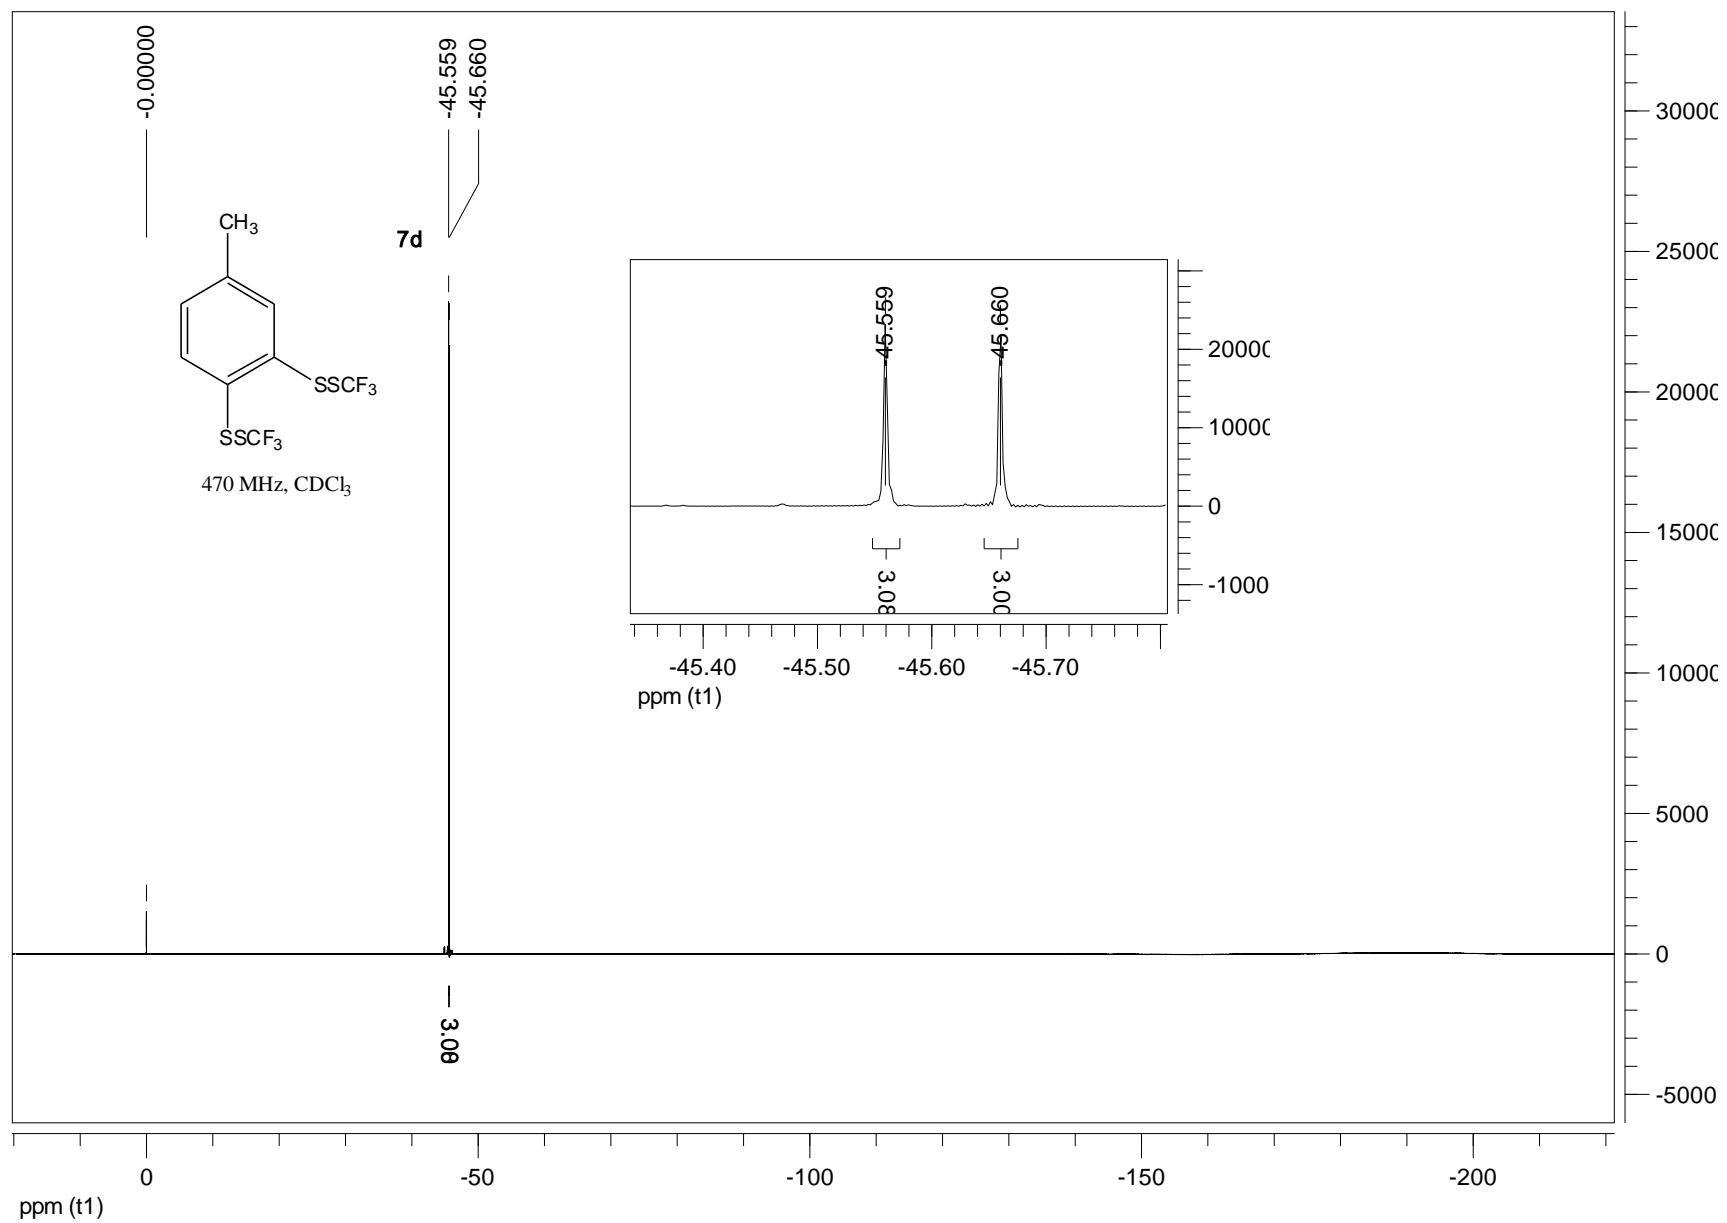

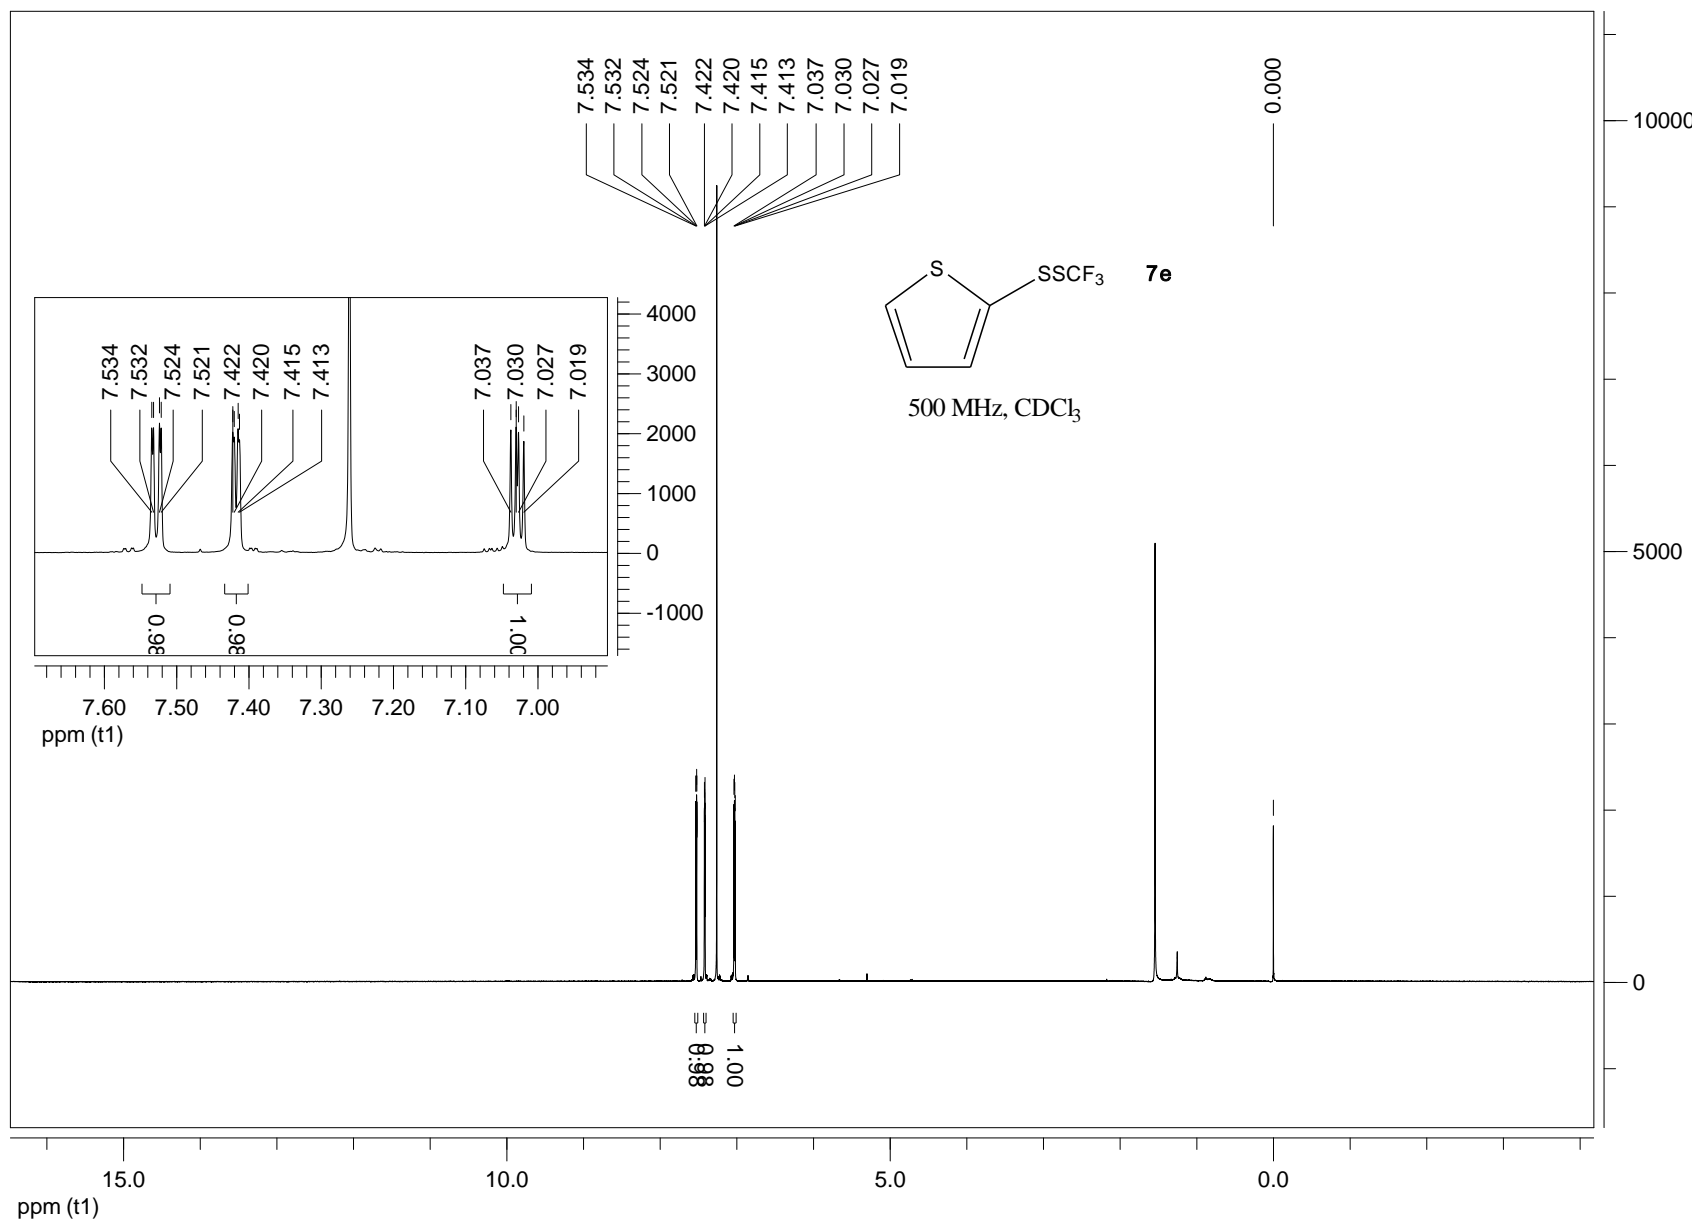

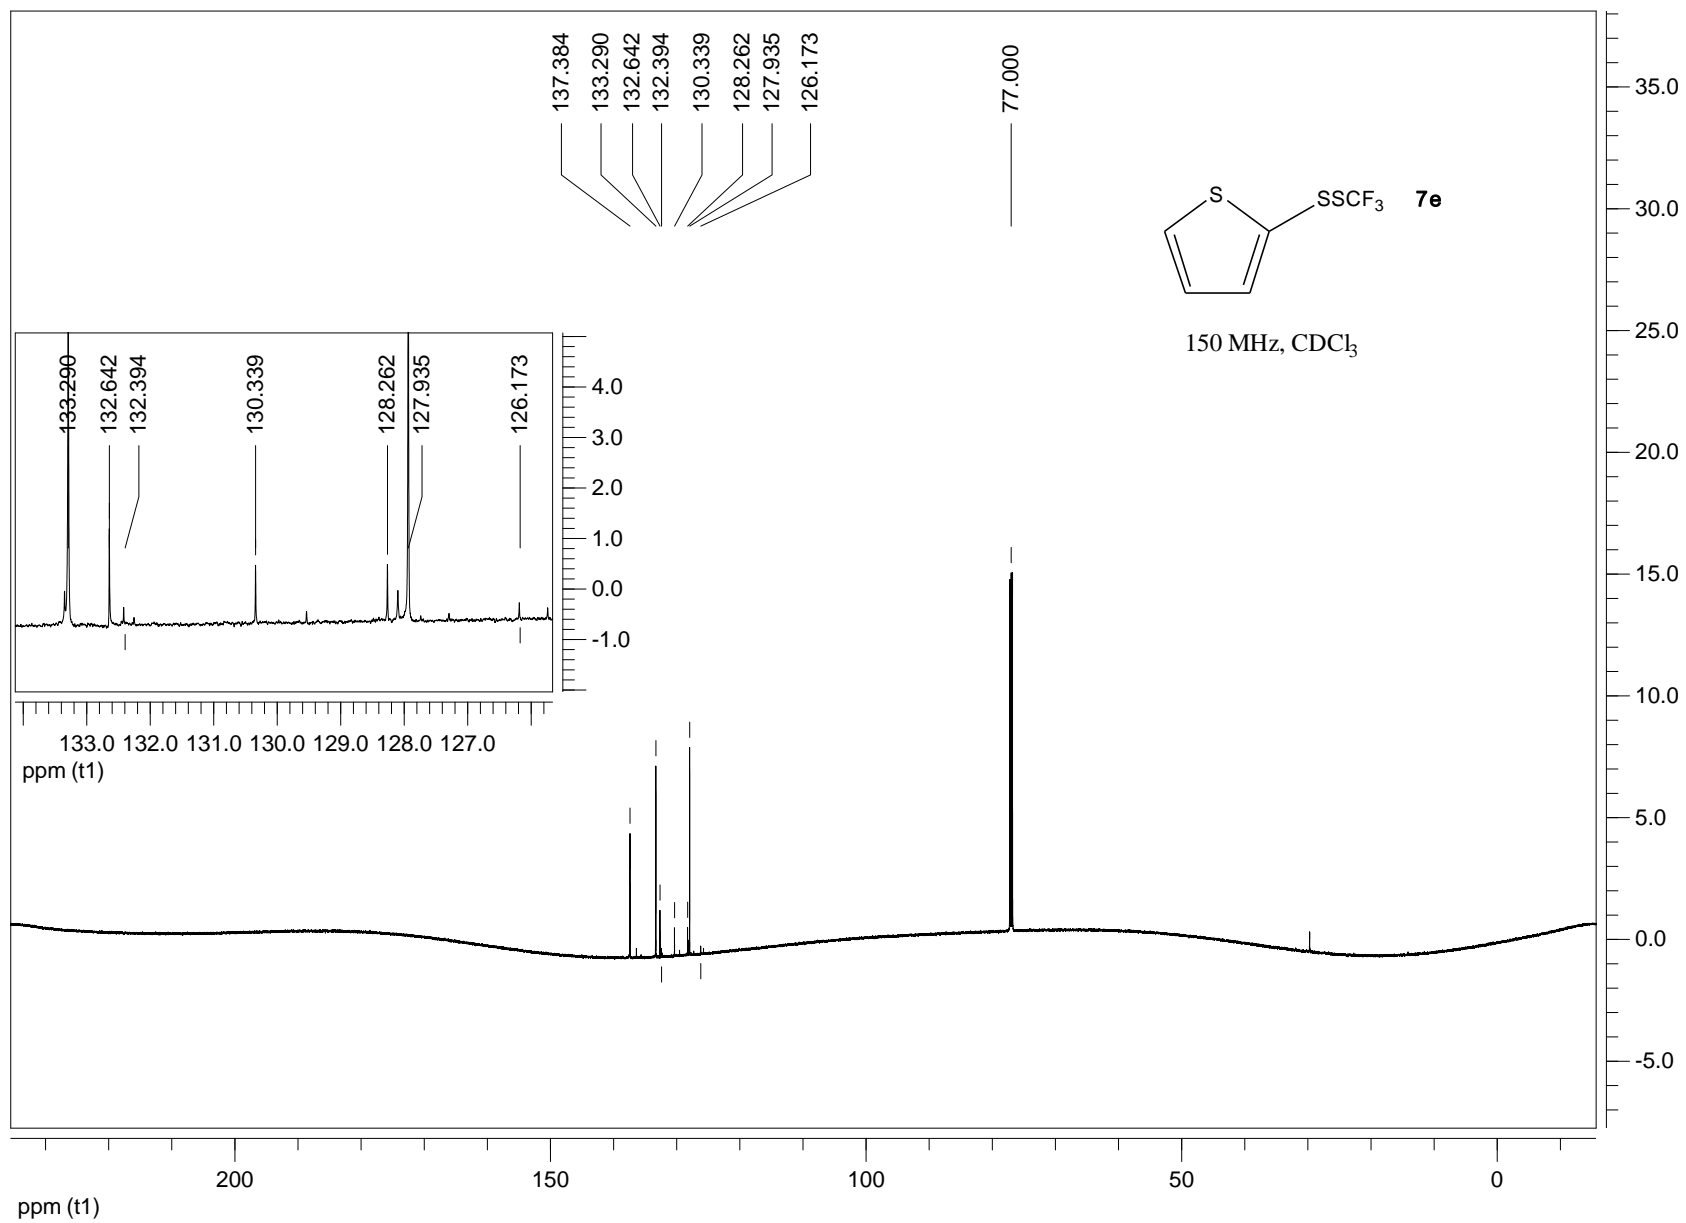

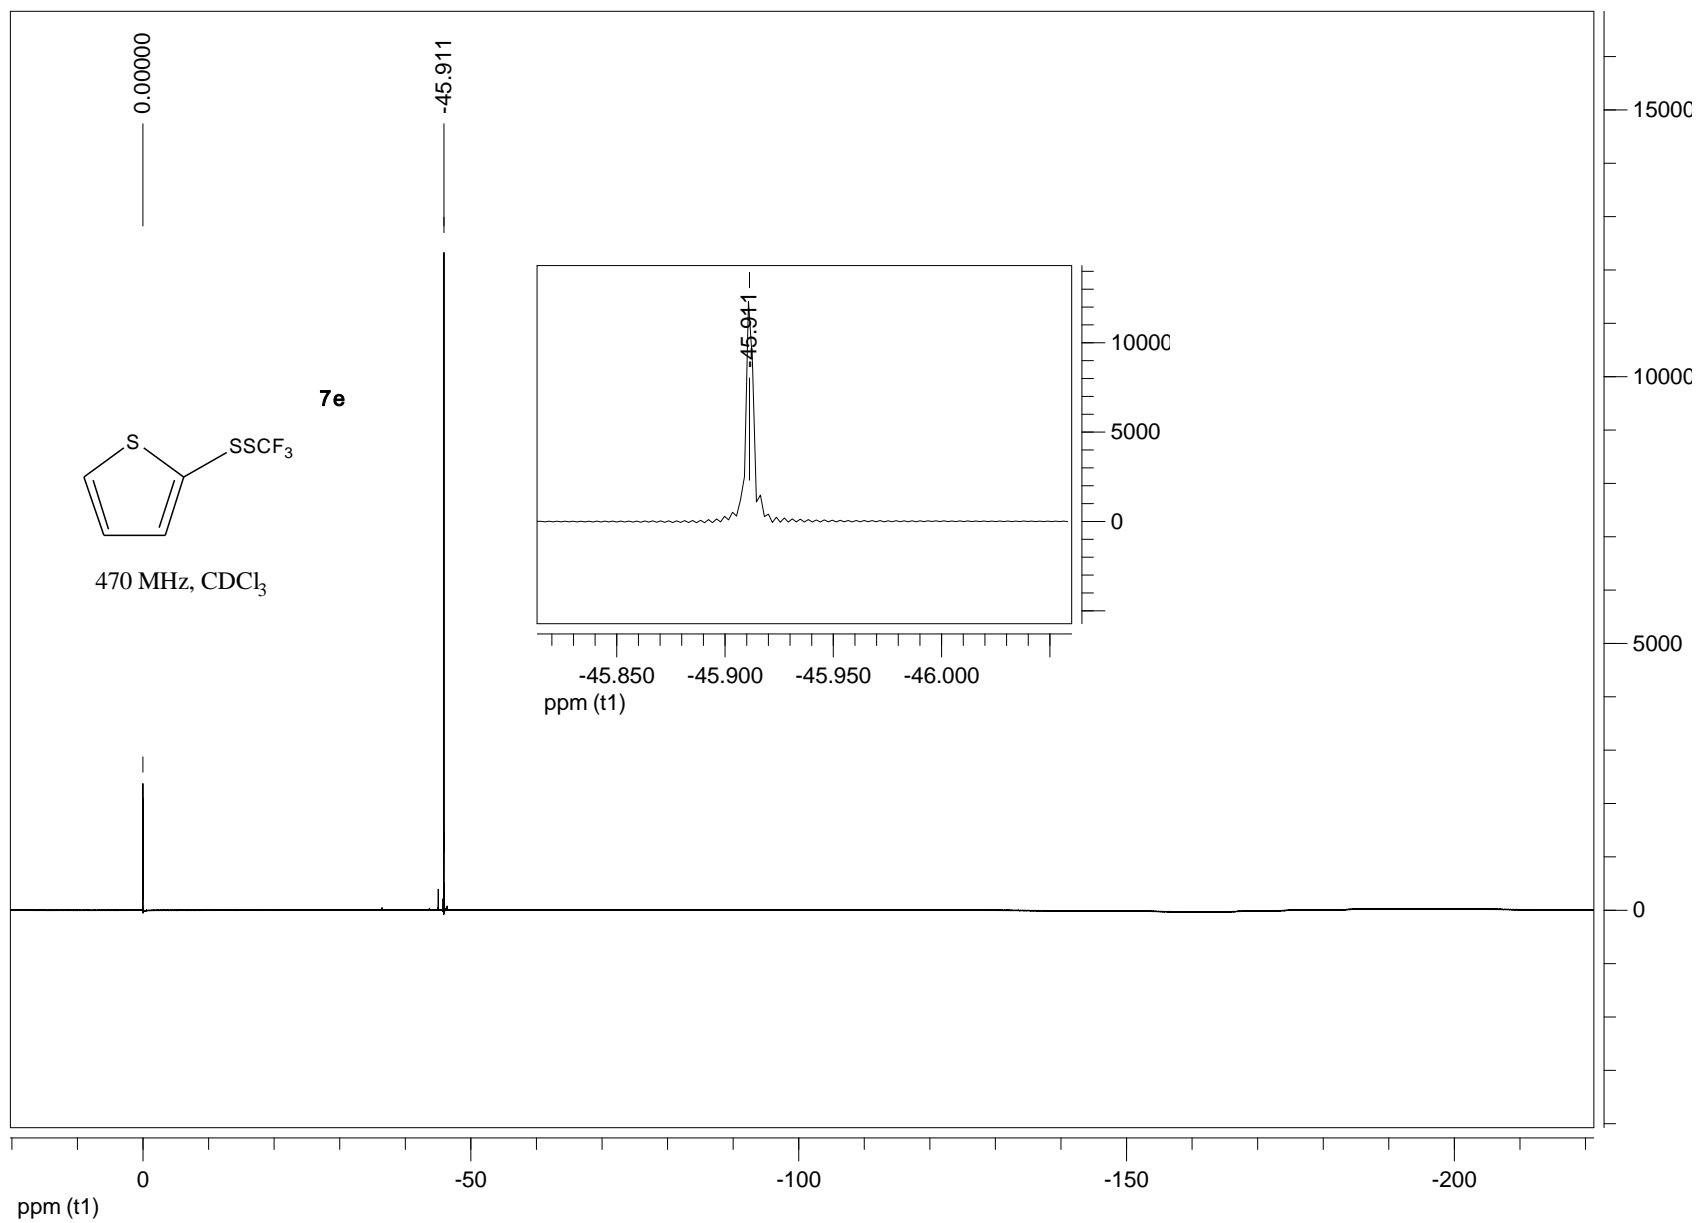

S104

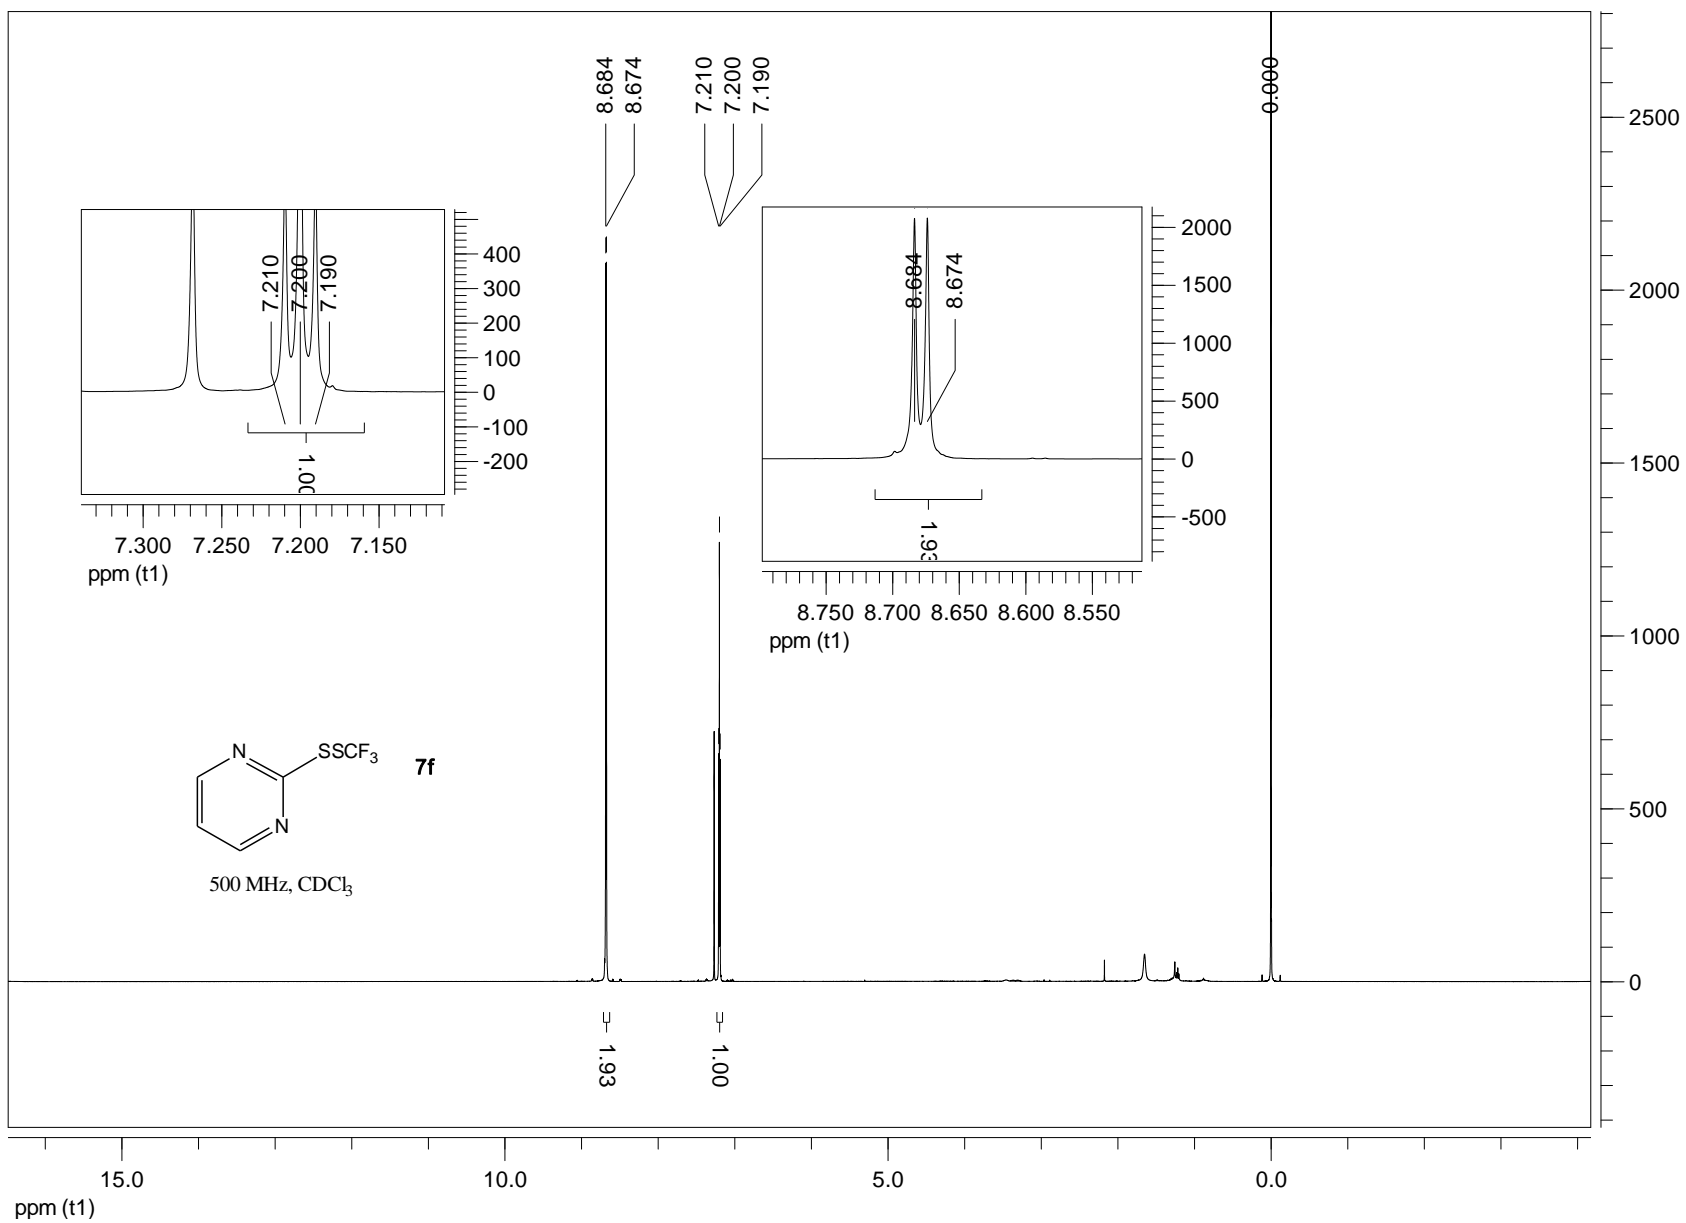

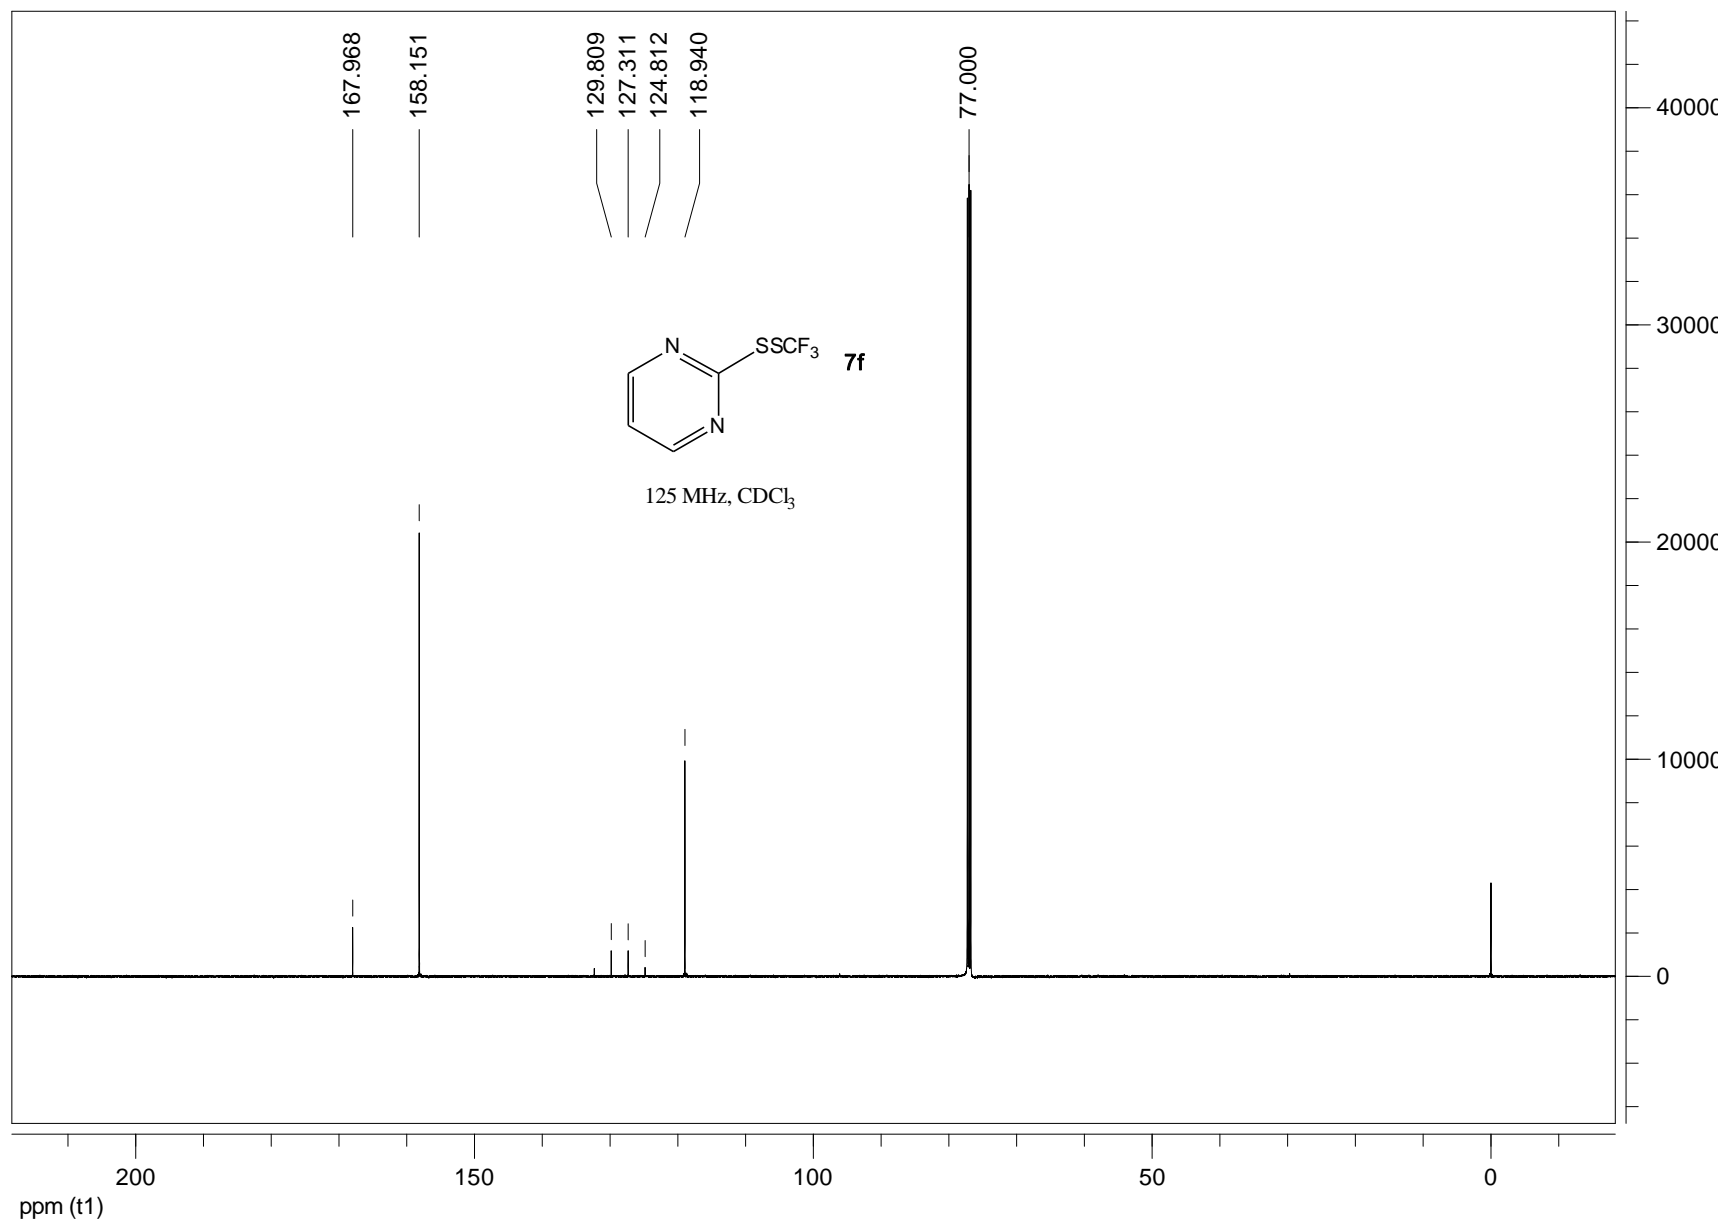

S106

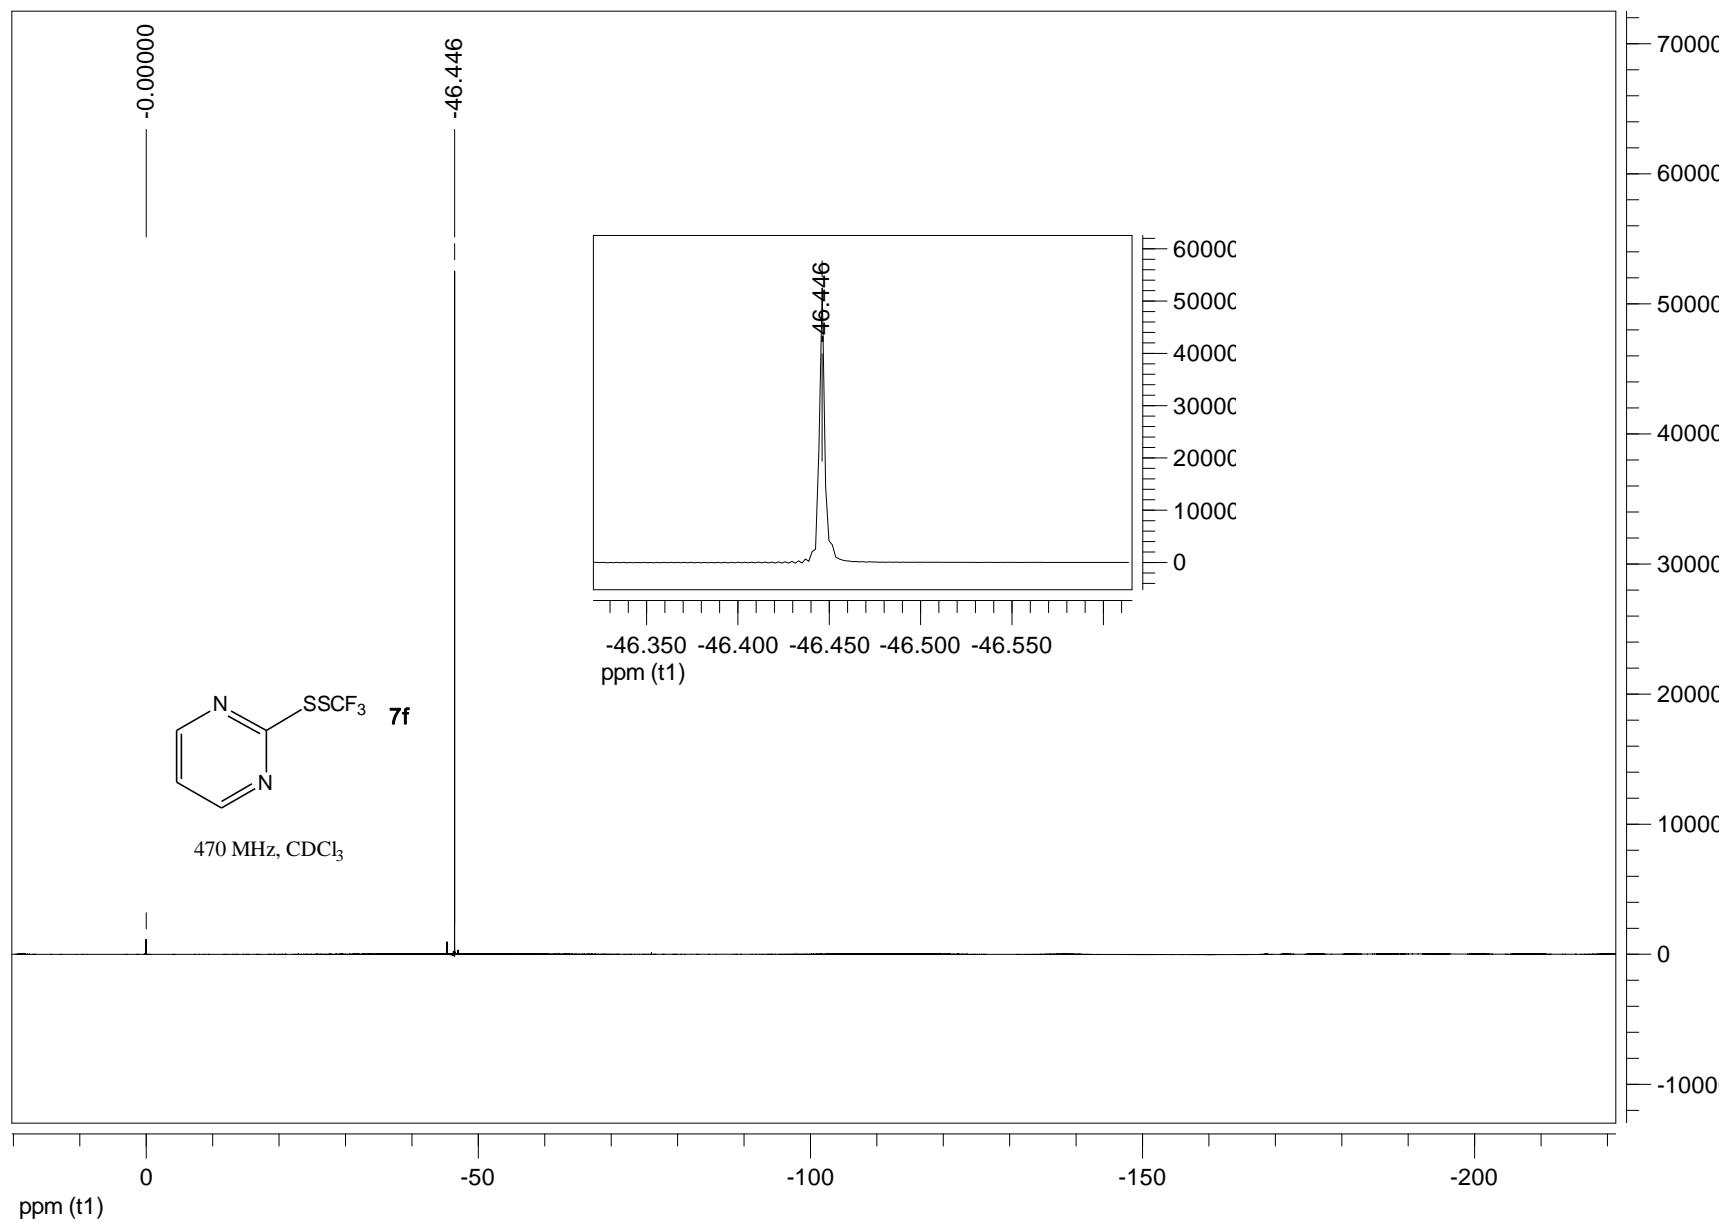

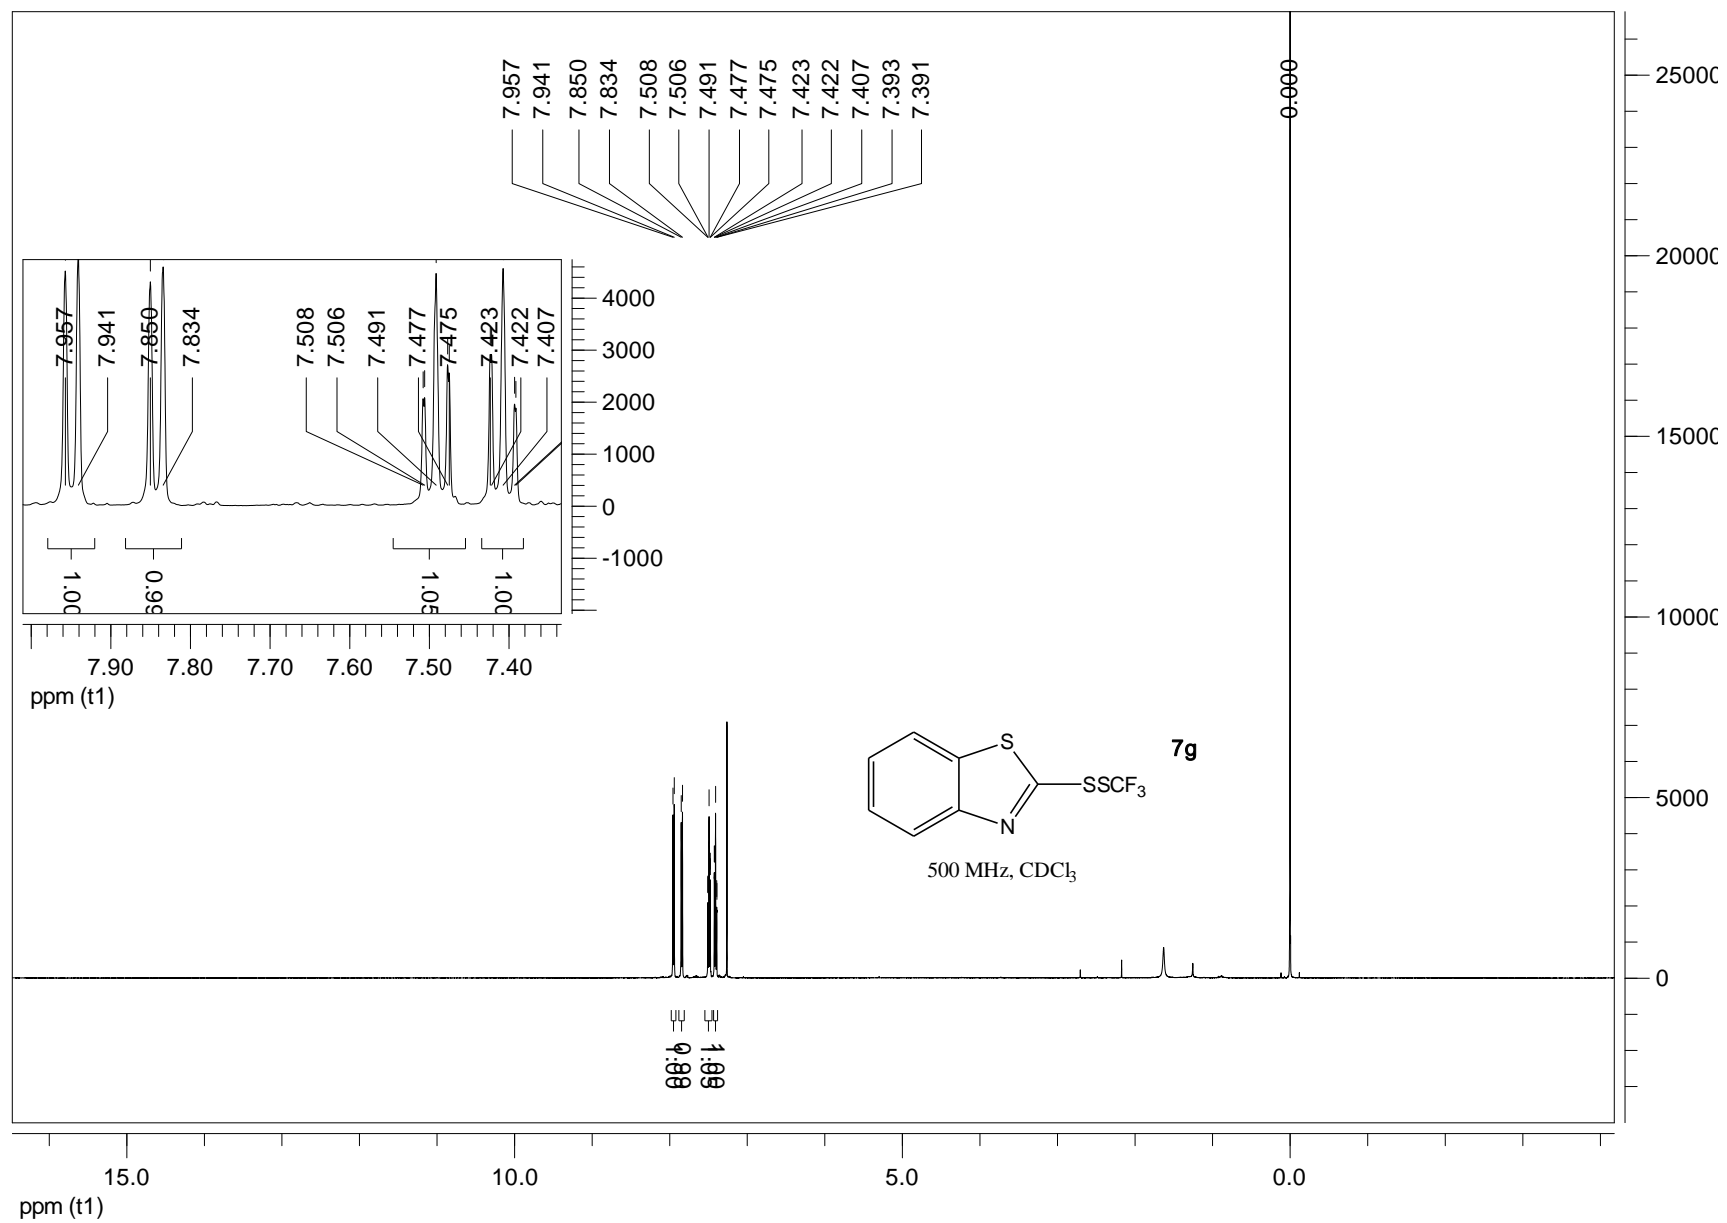



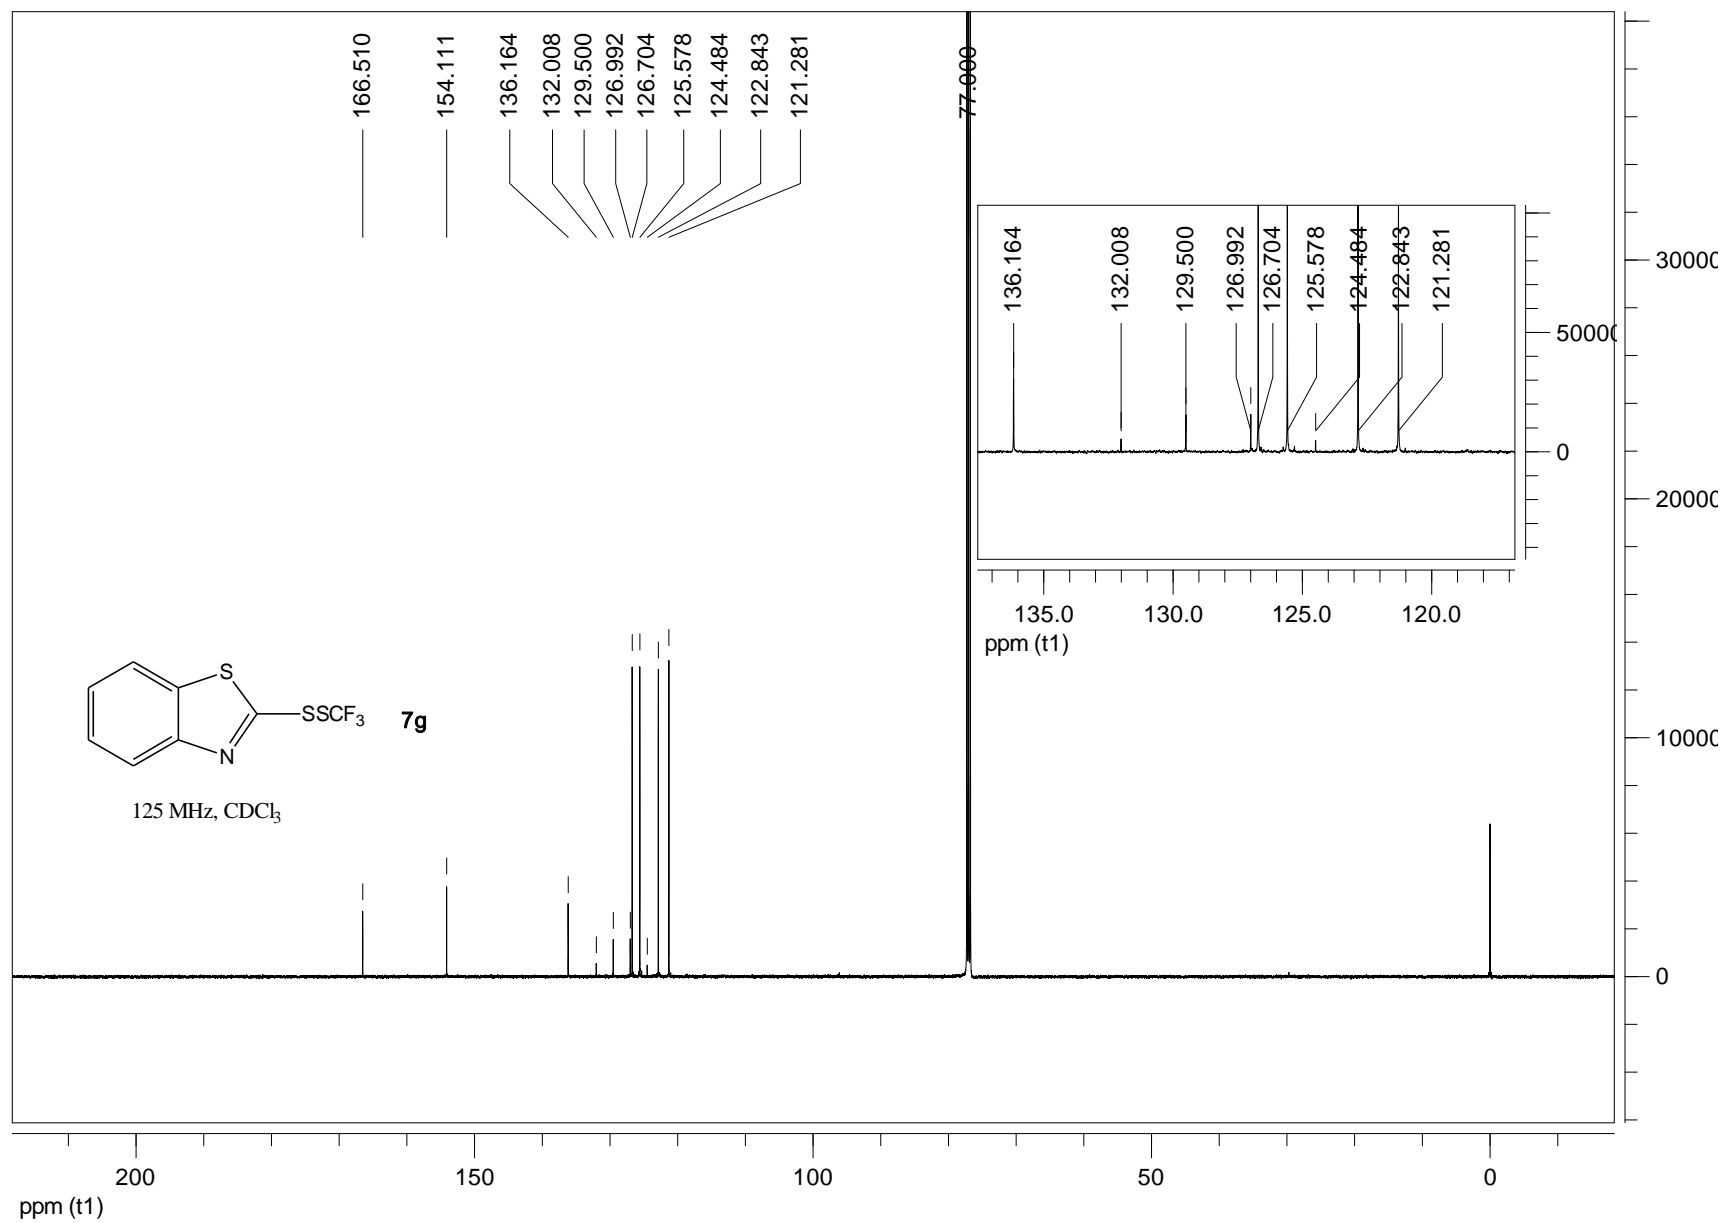

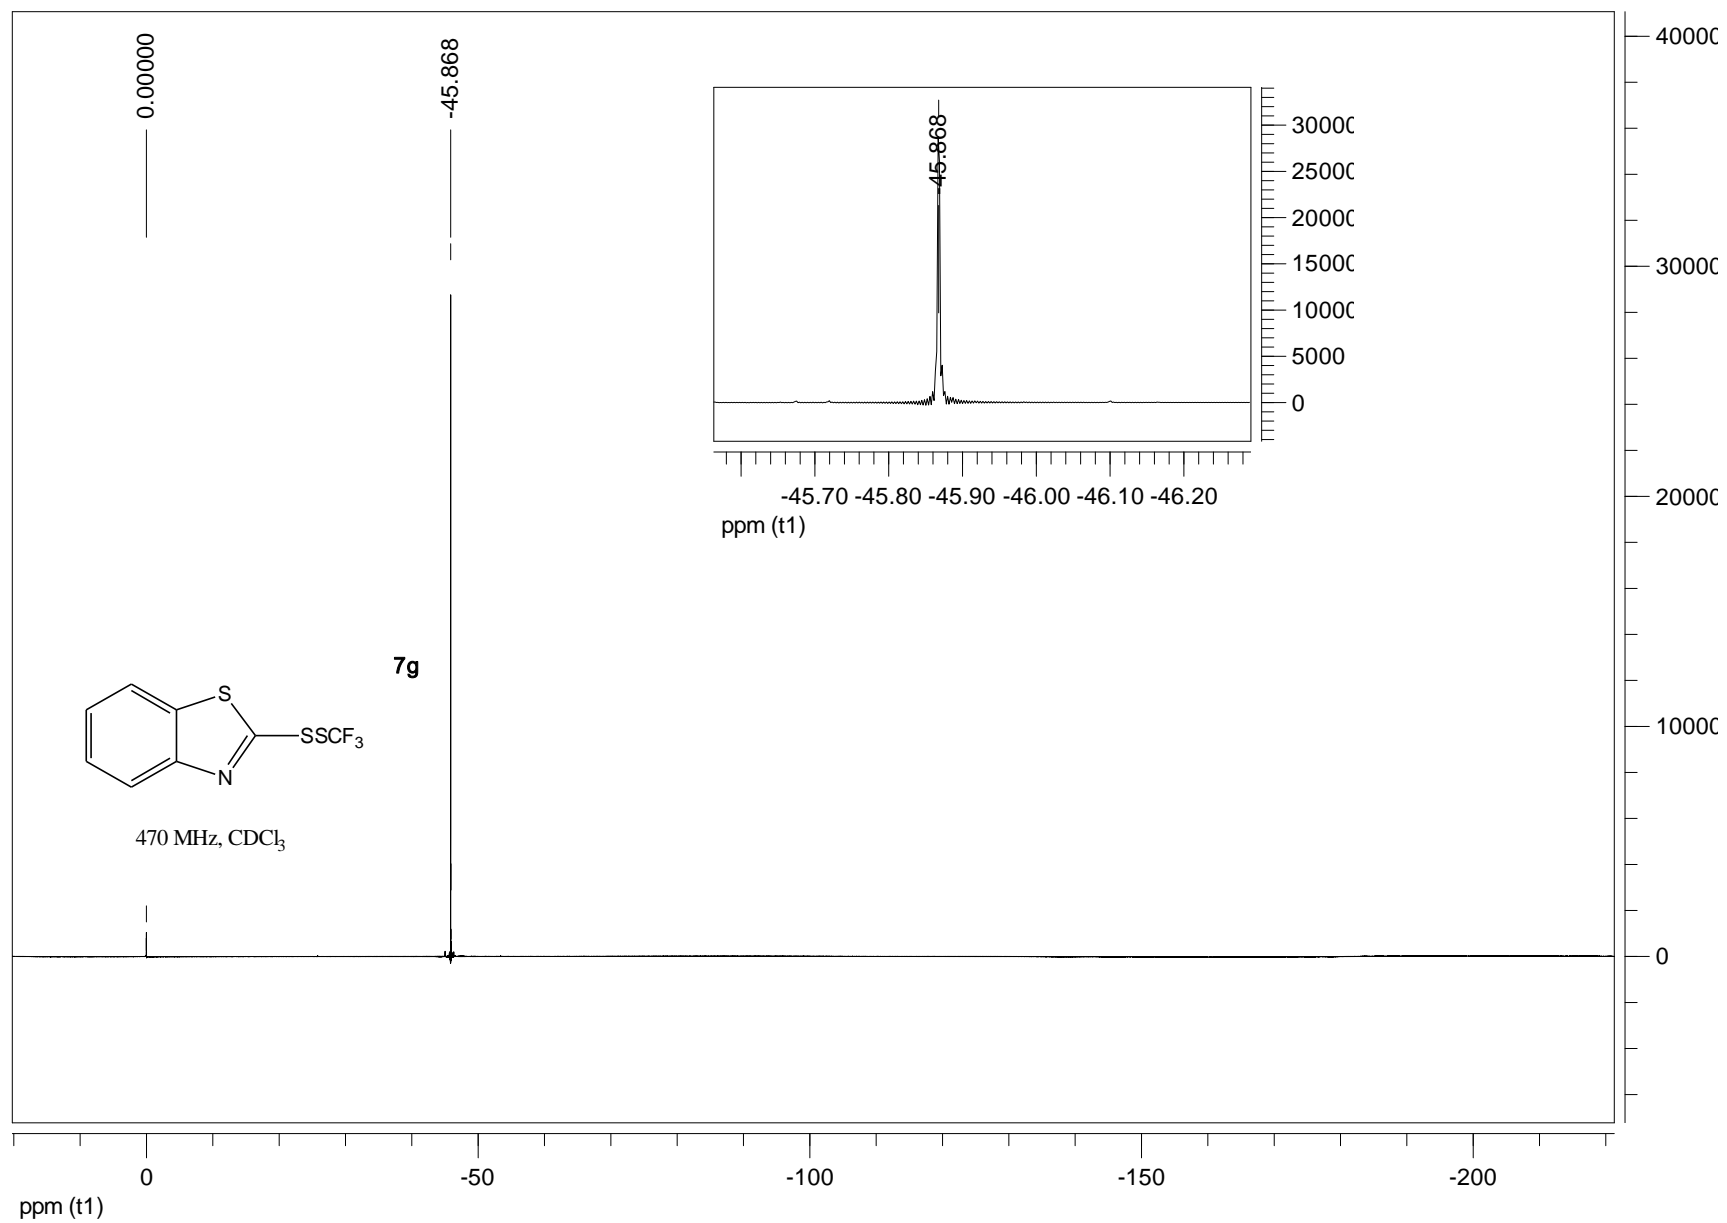

S110

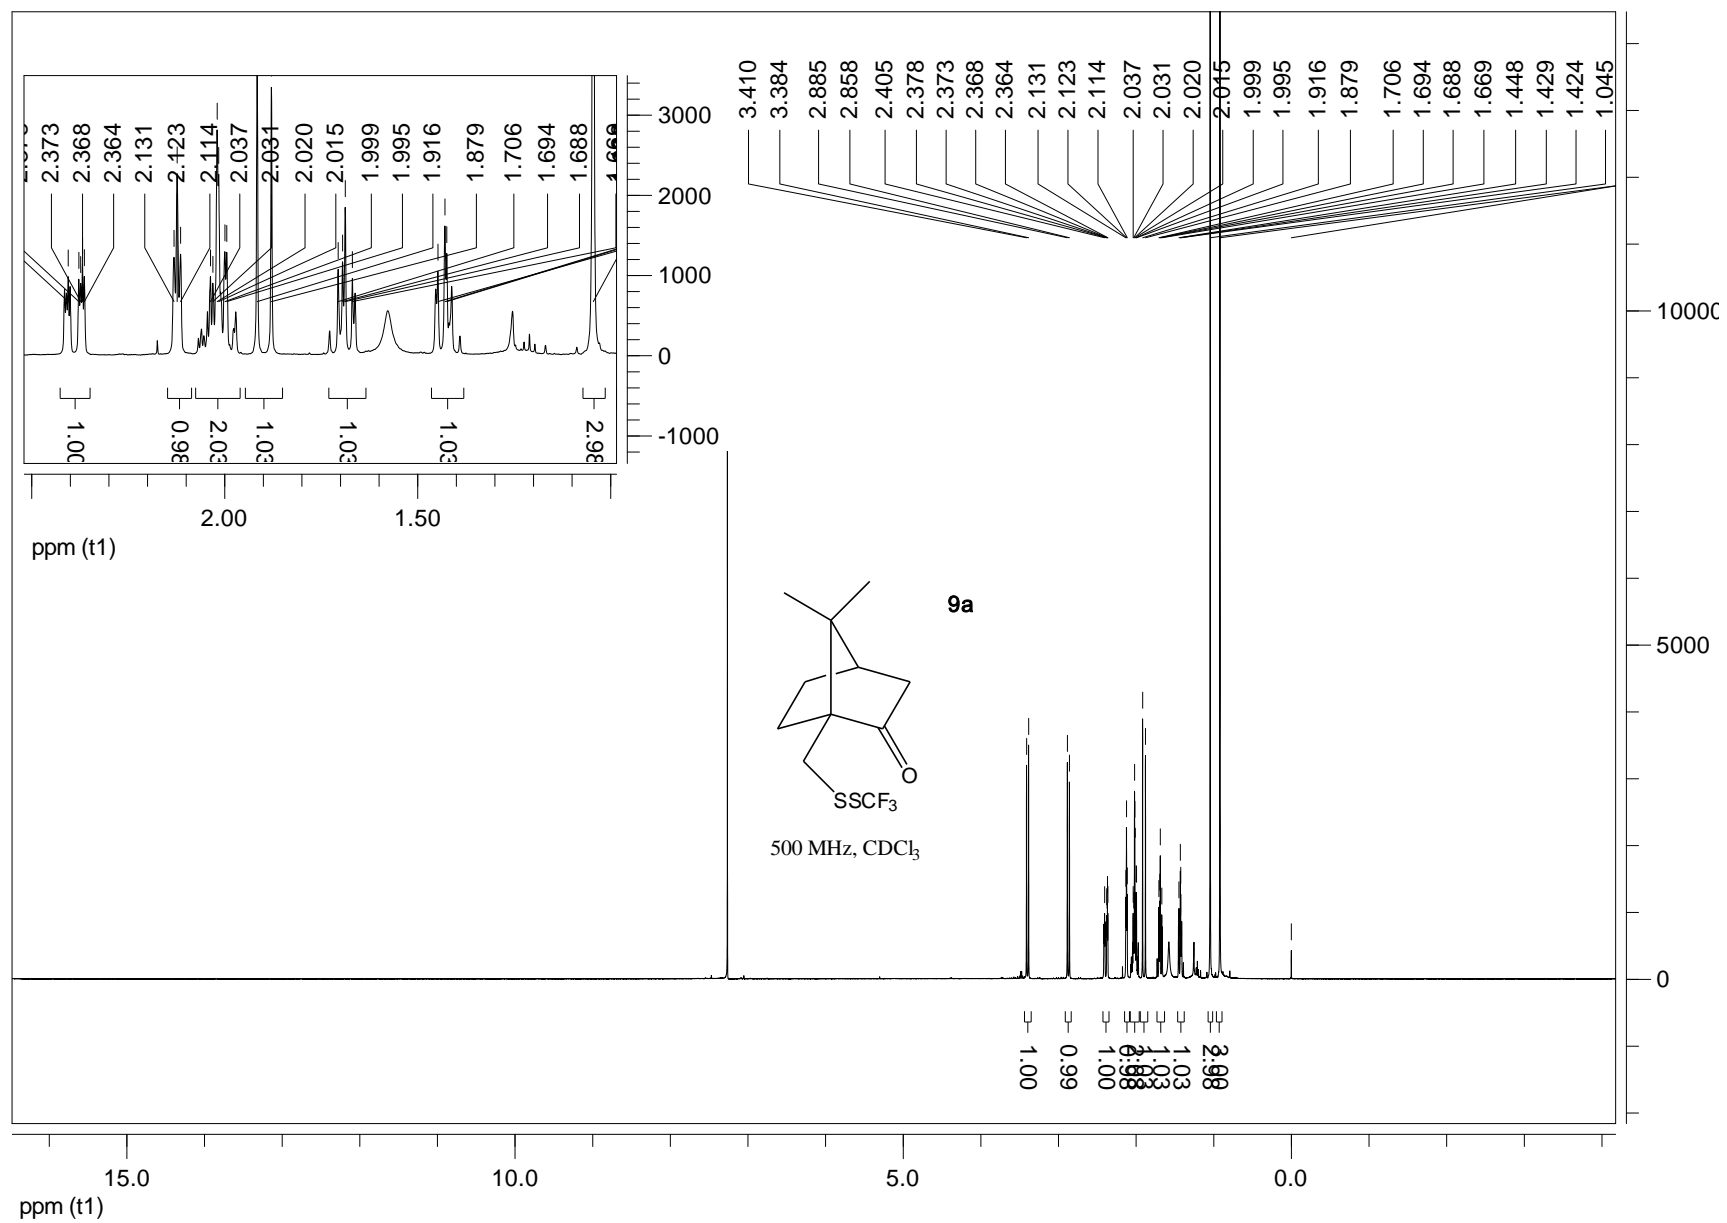

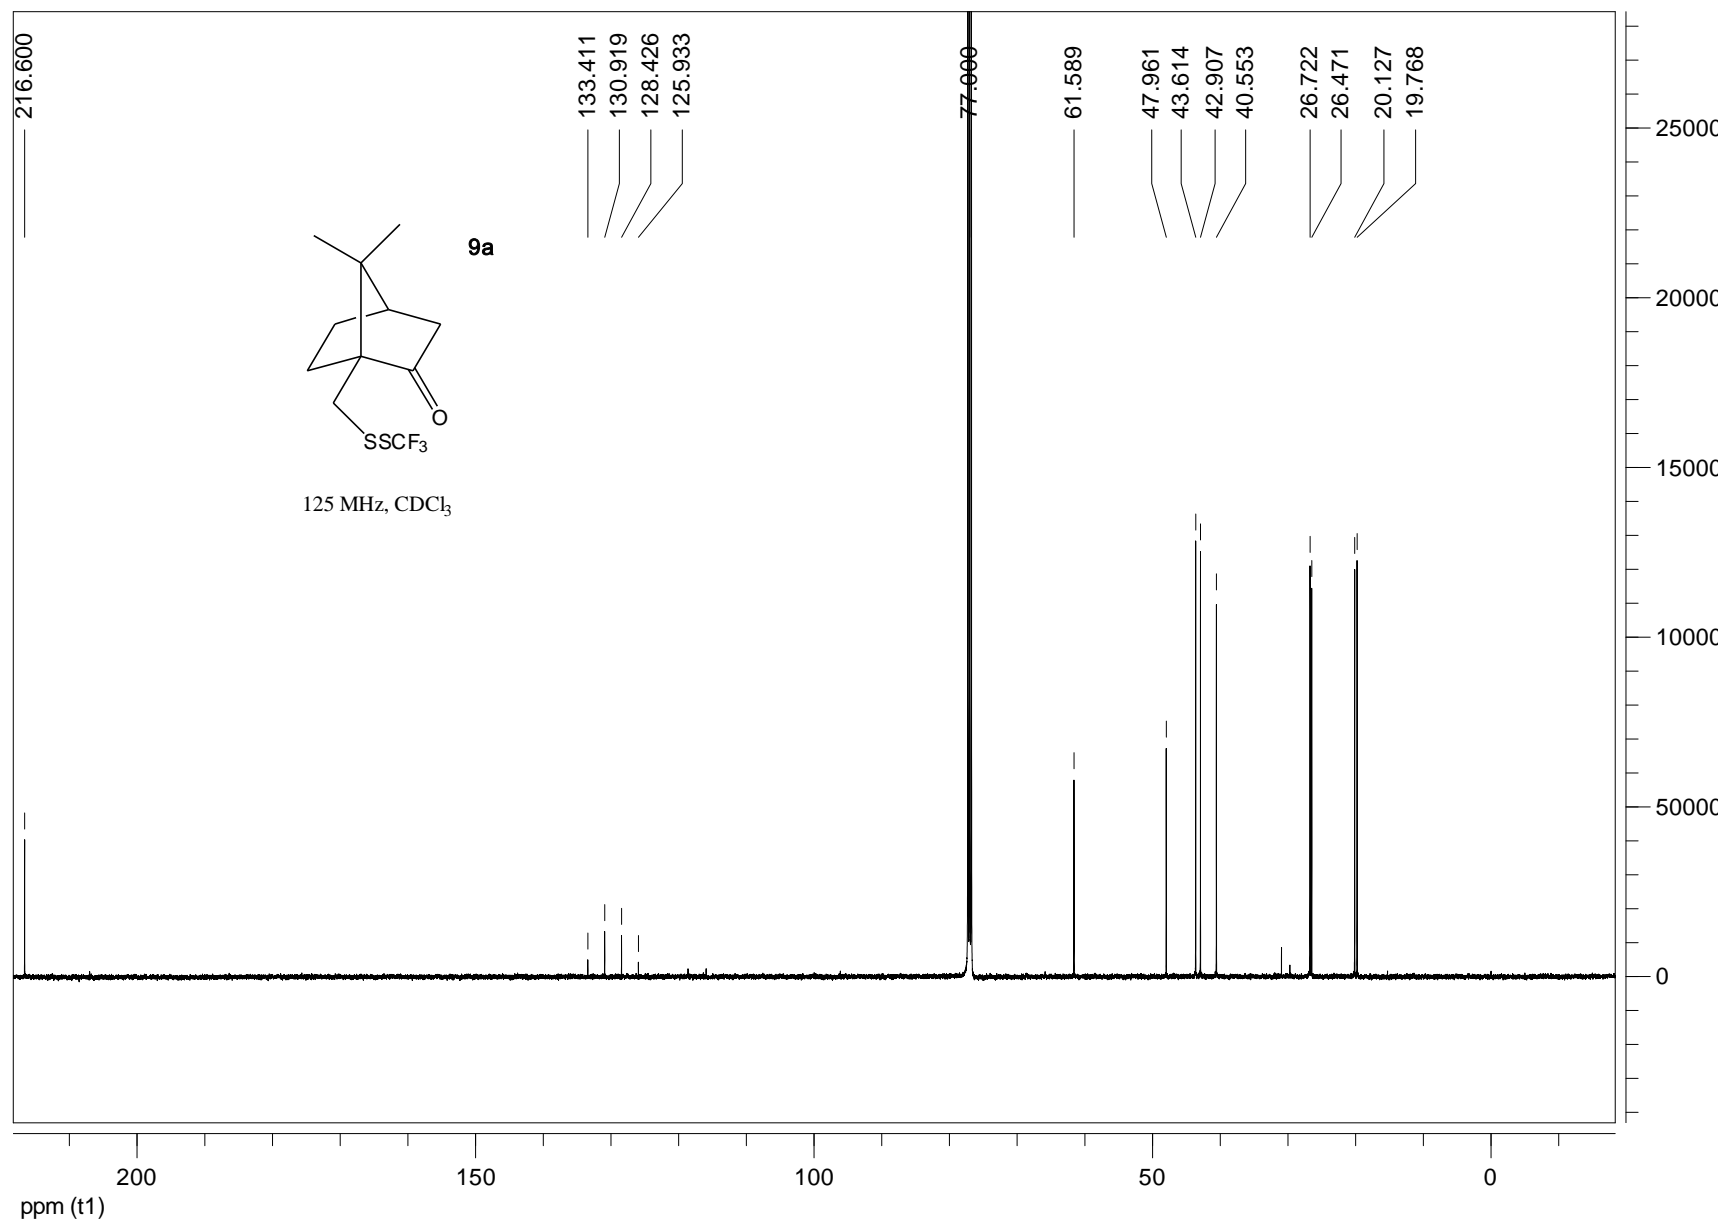

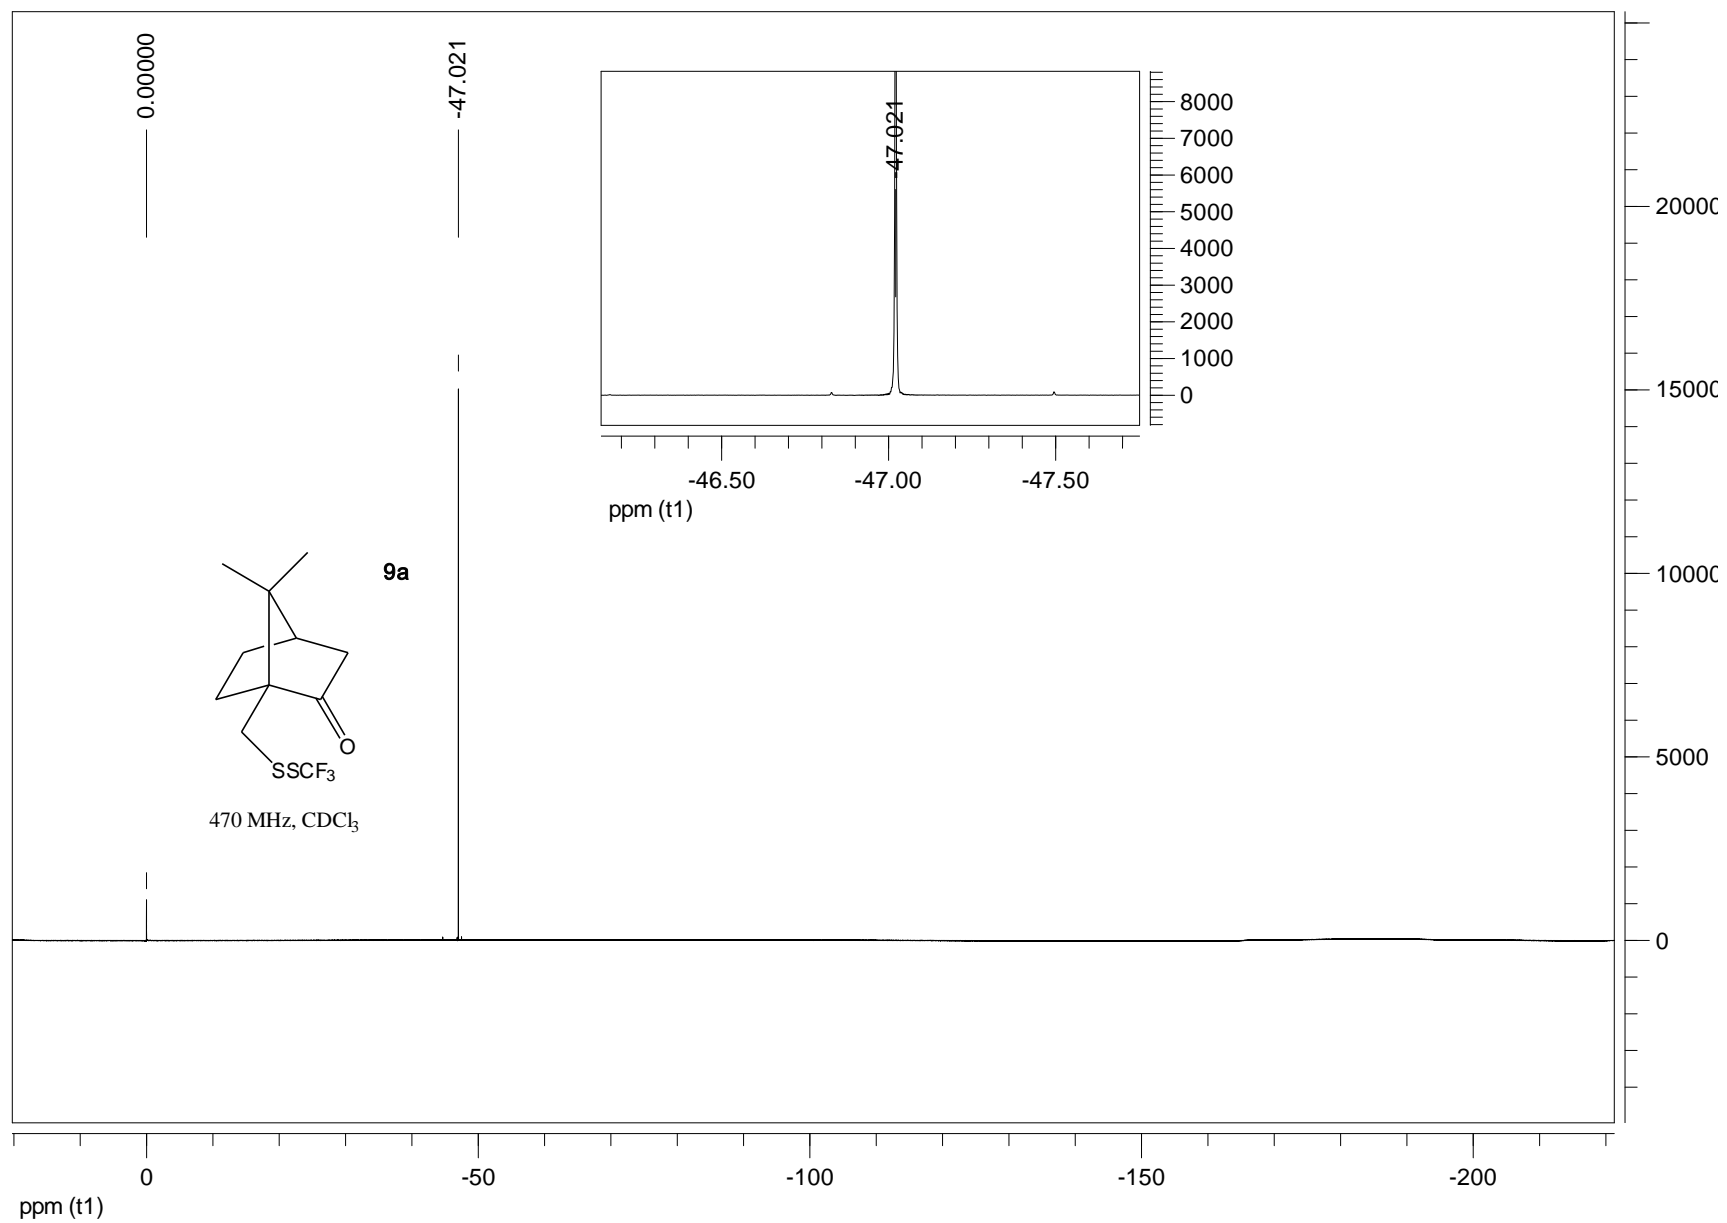

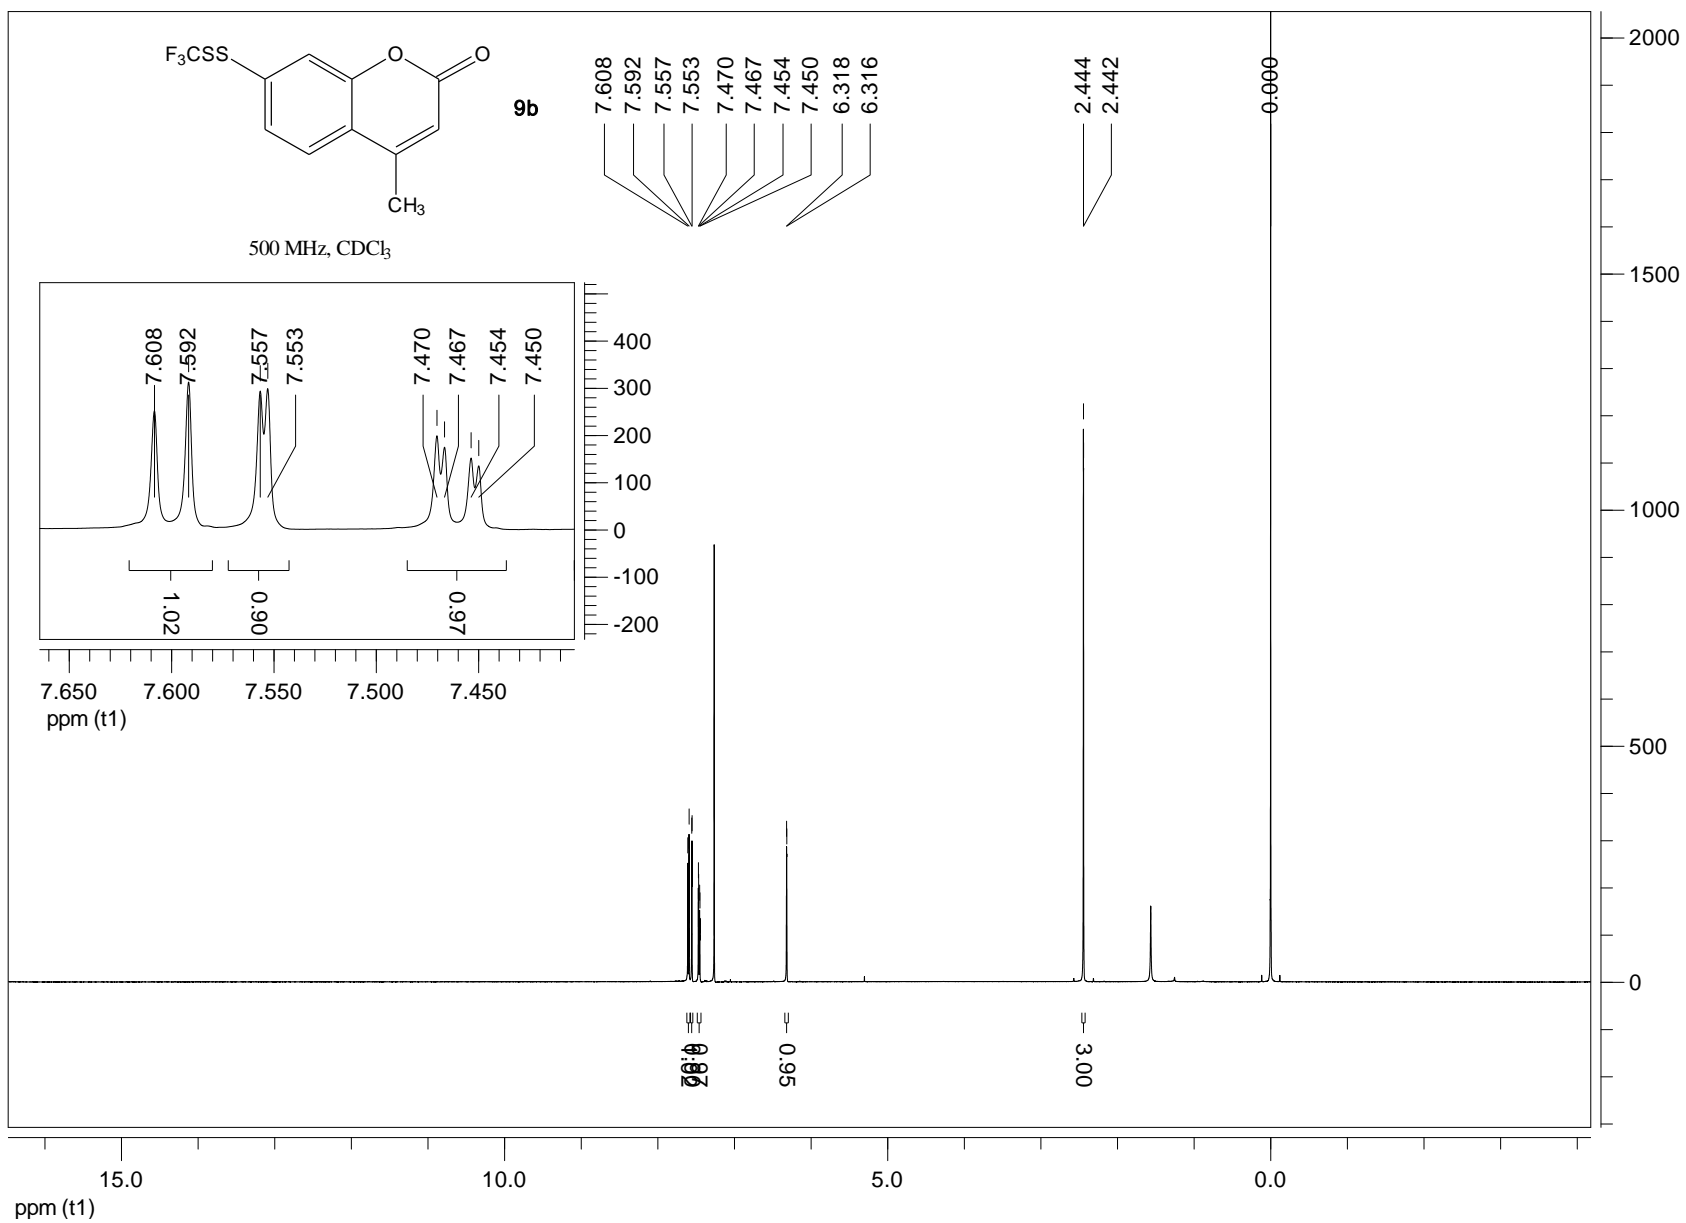

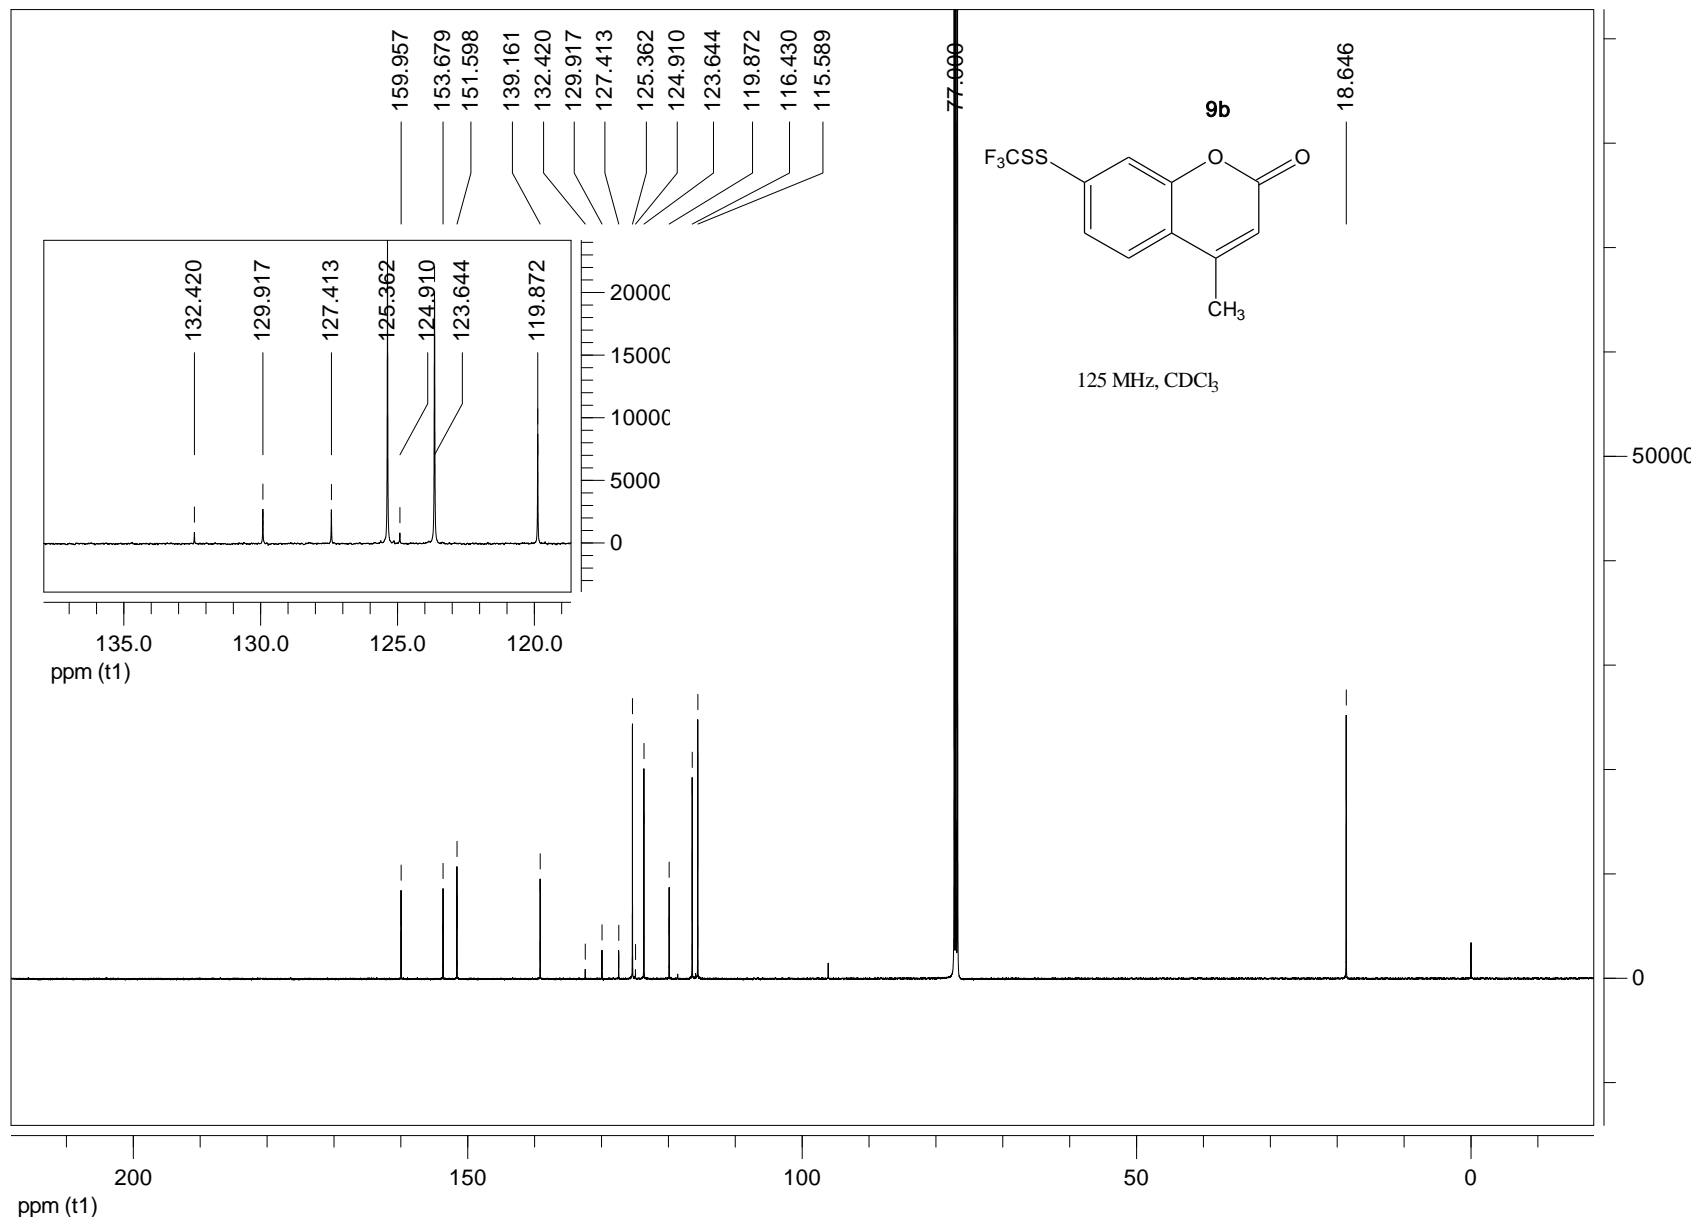

S115

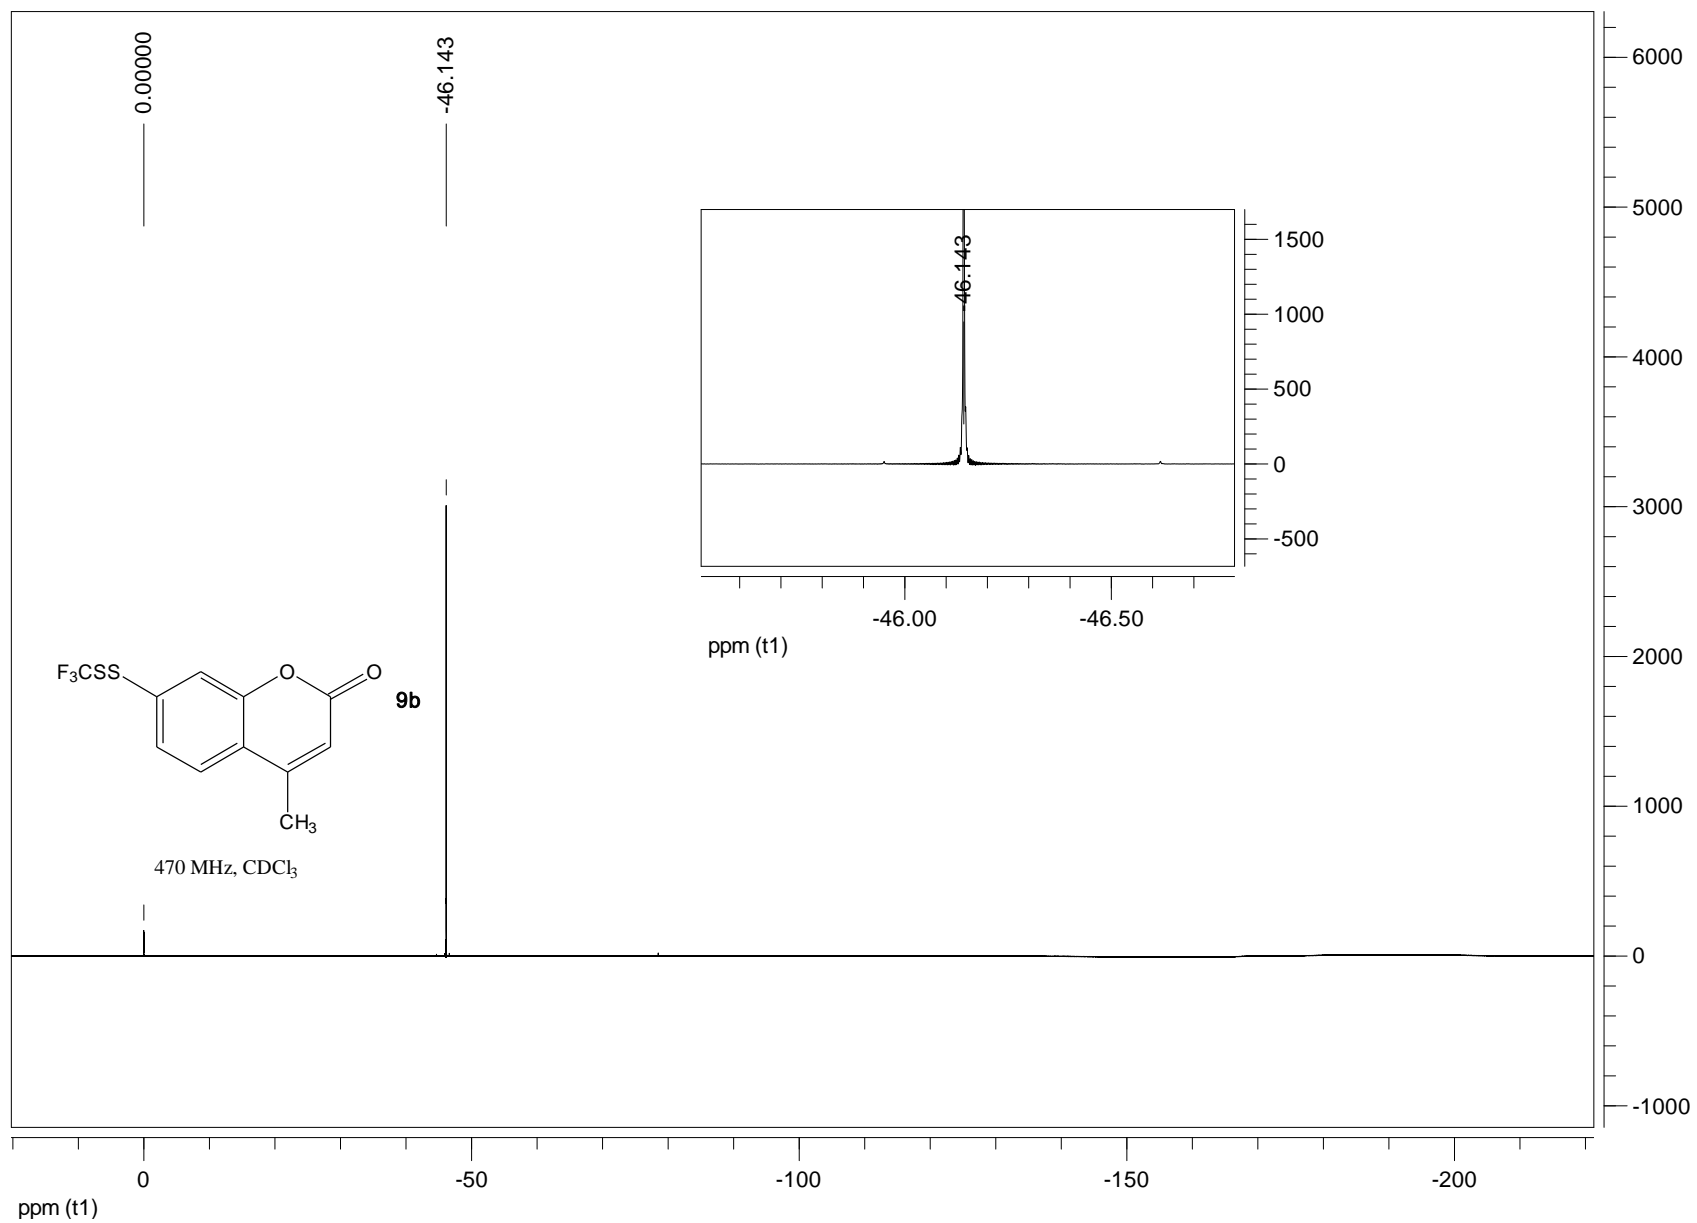



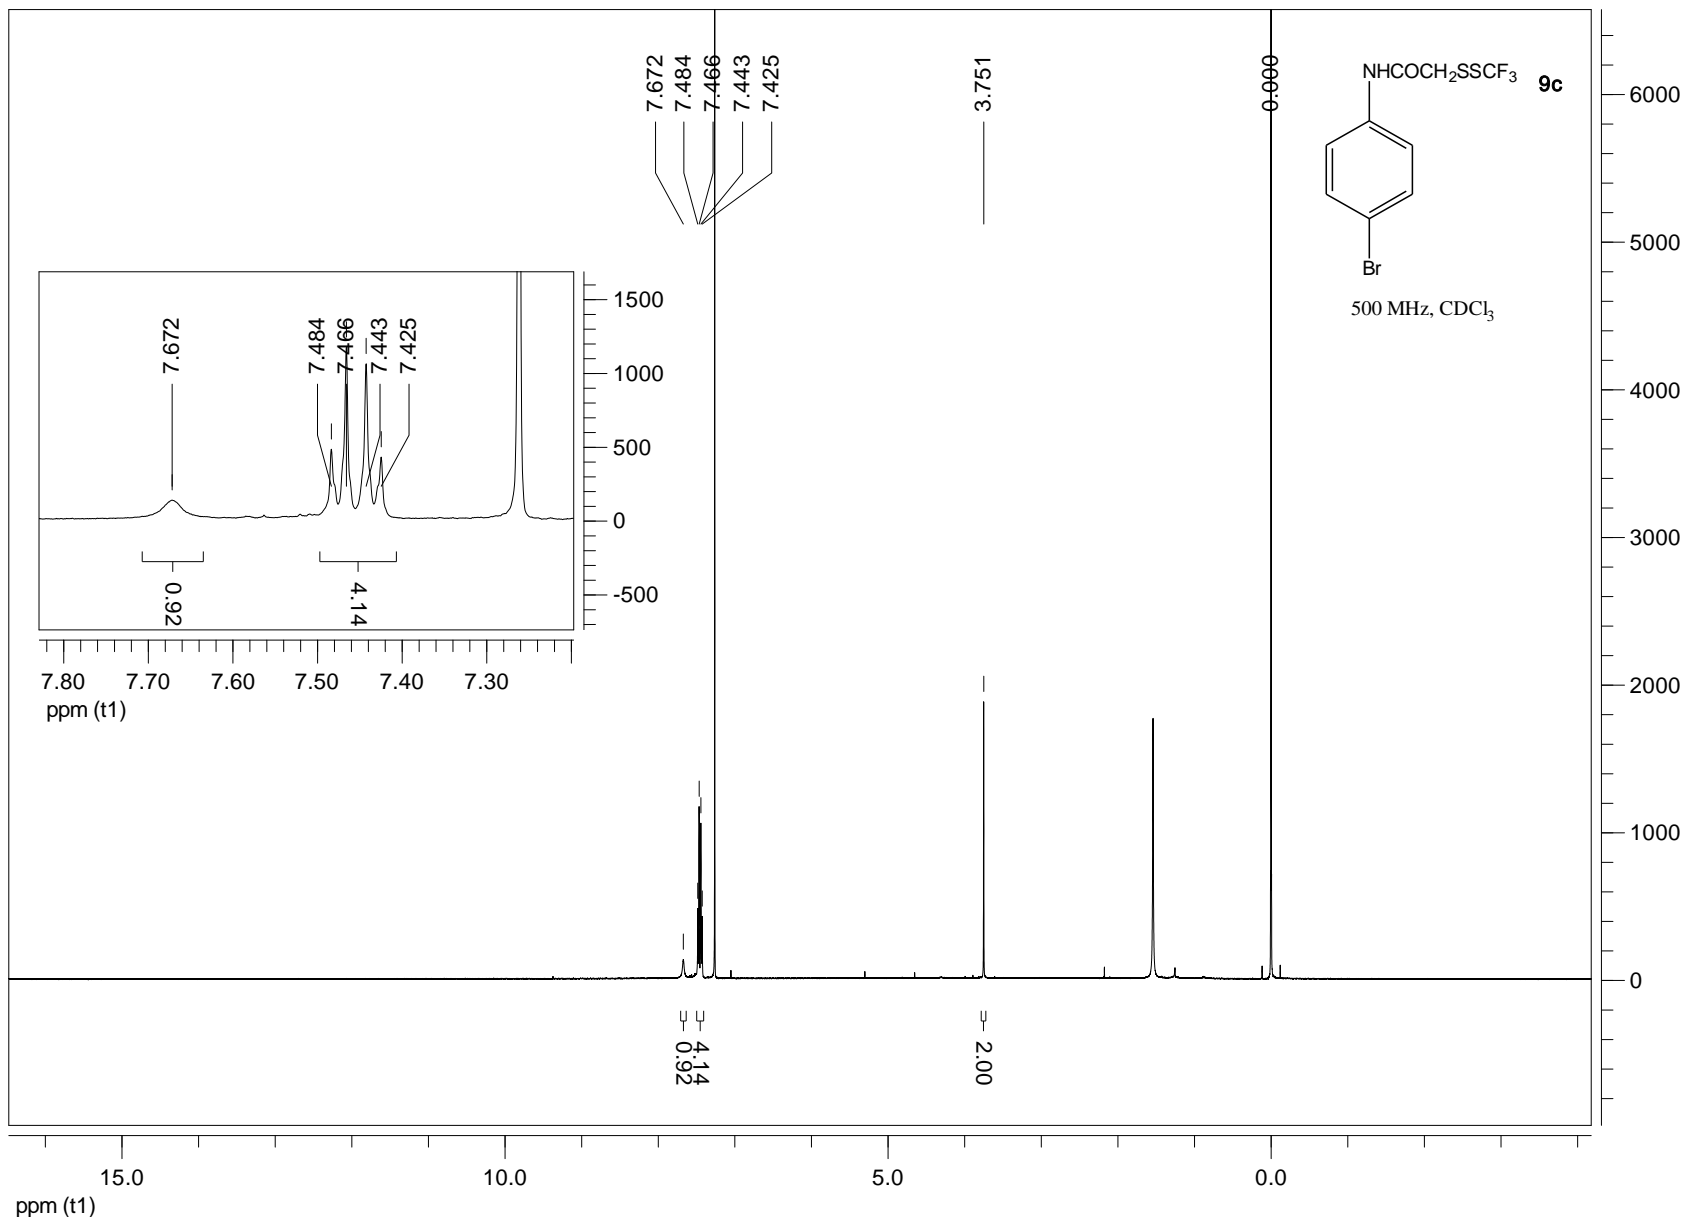

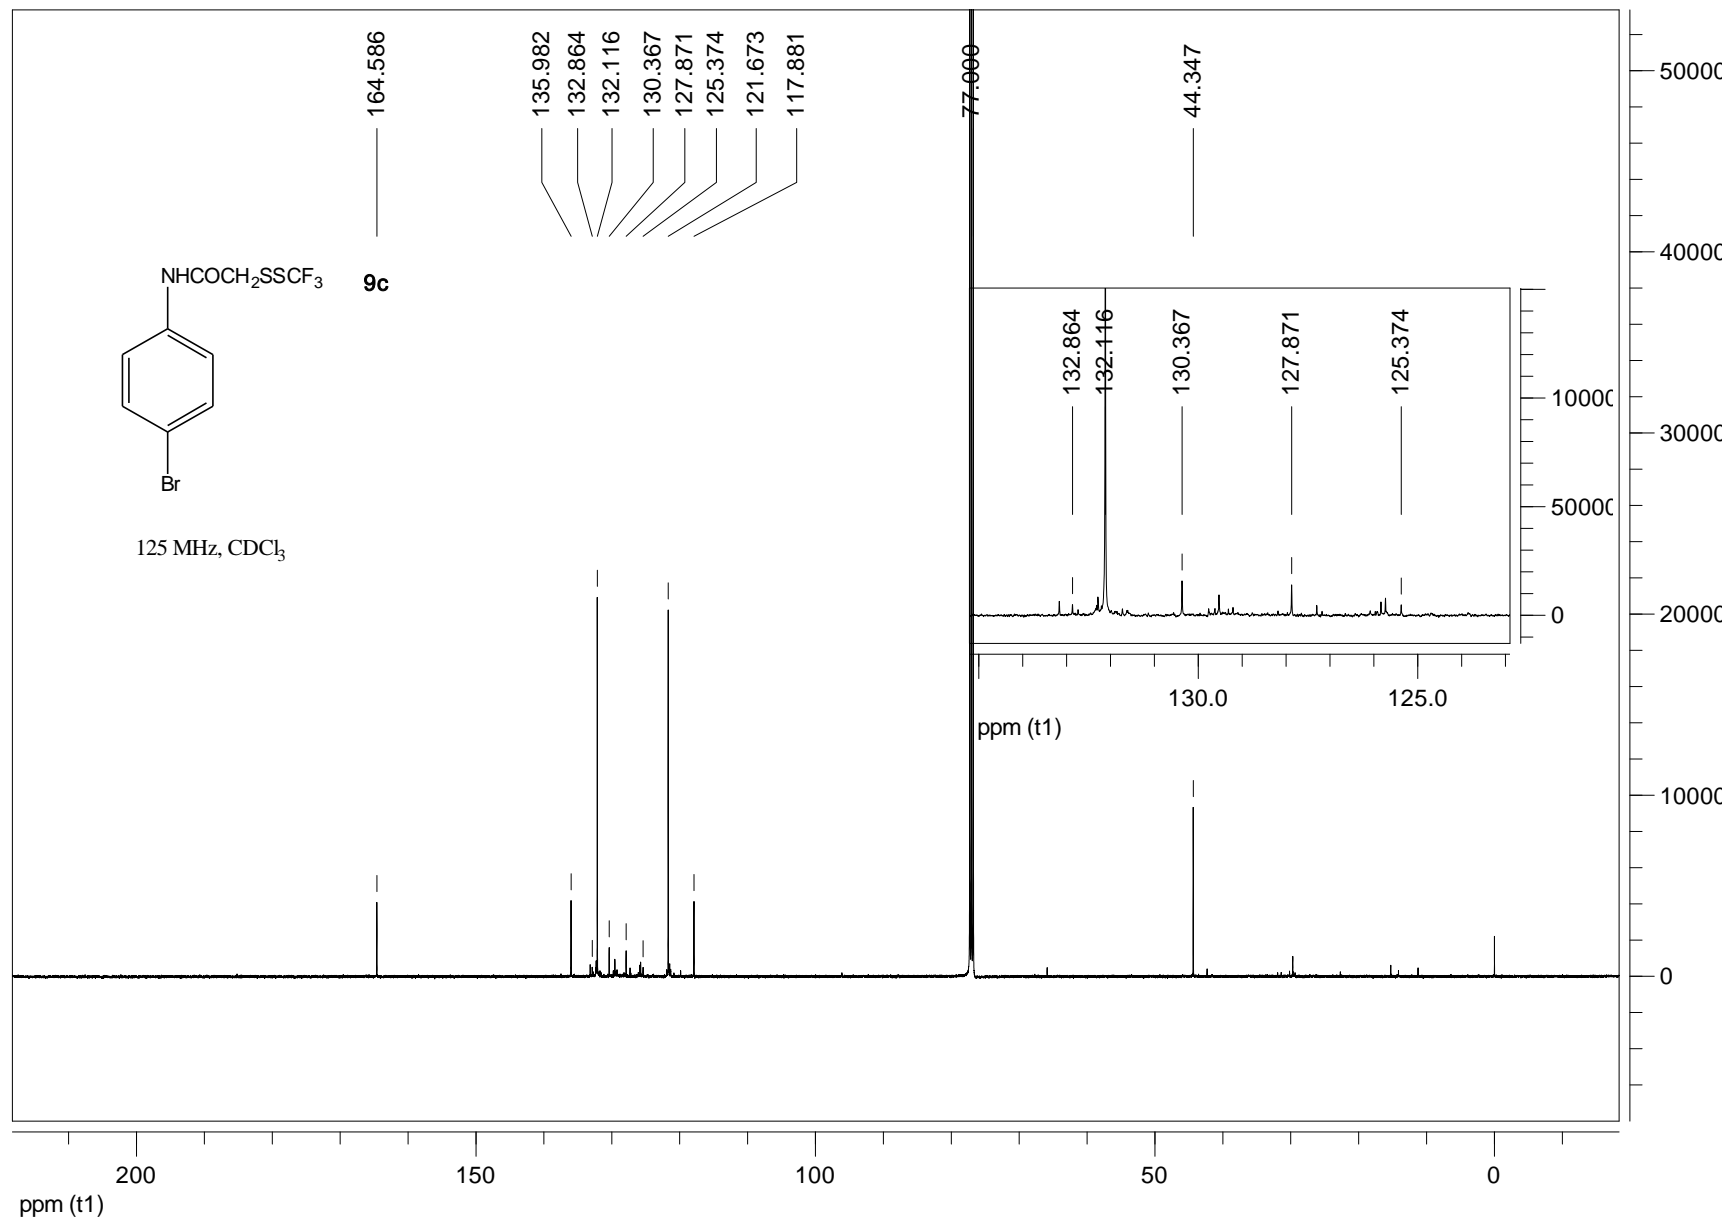

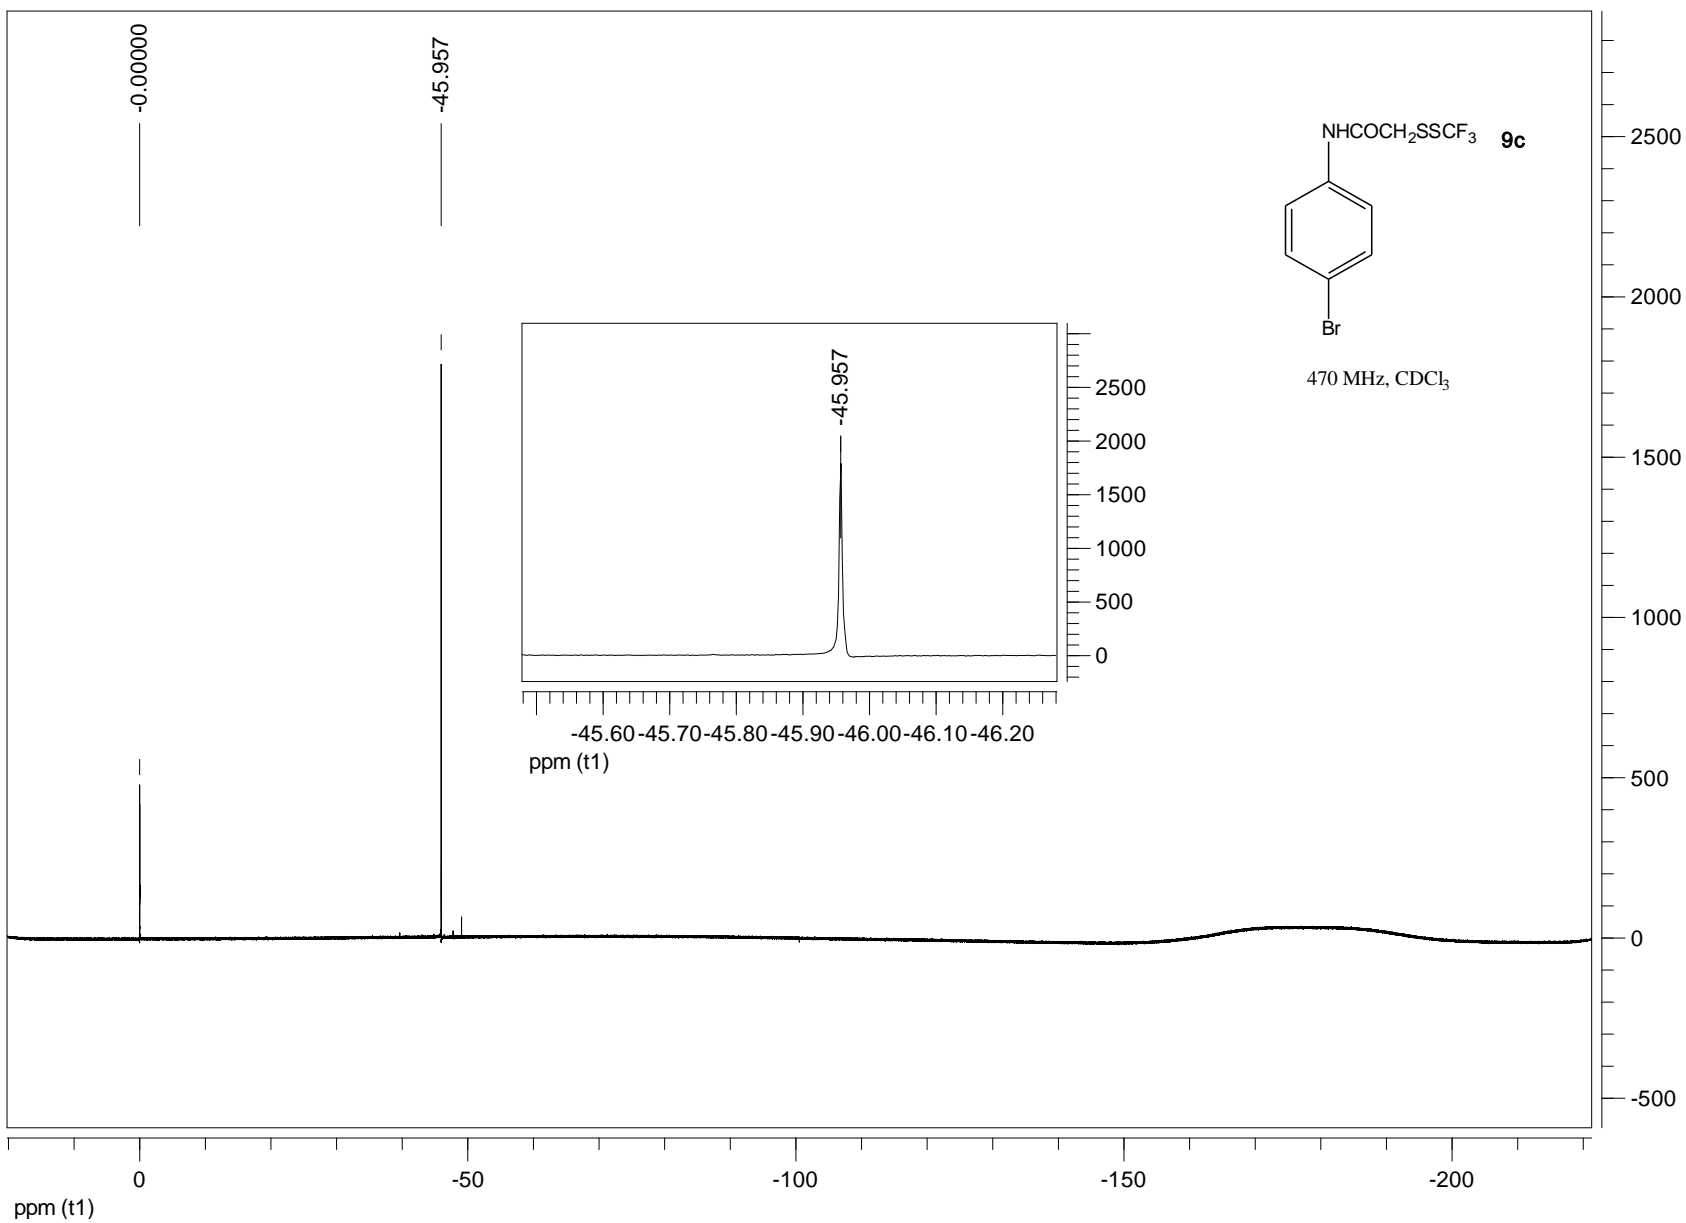

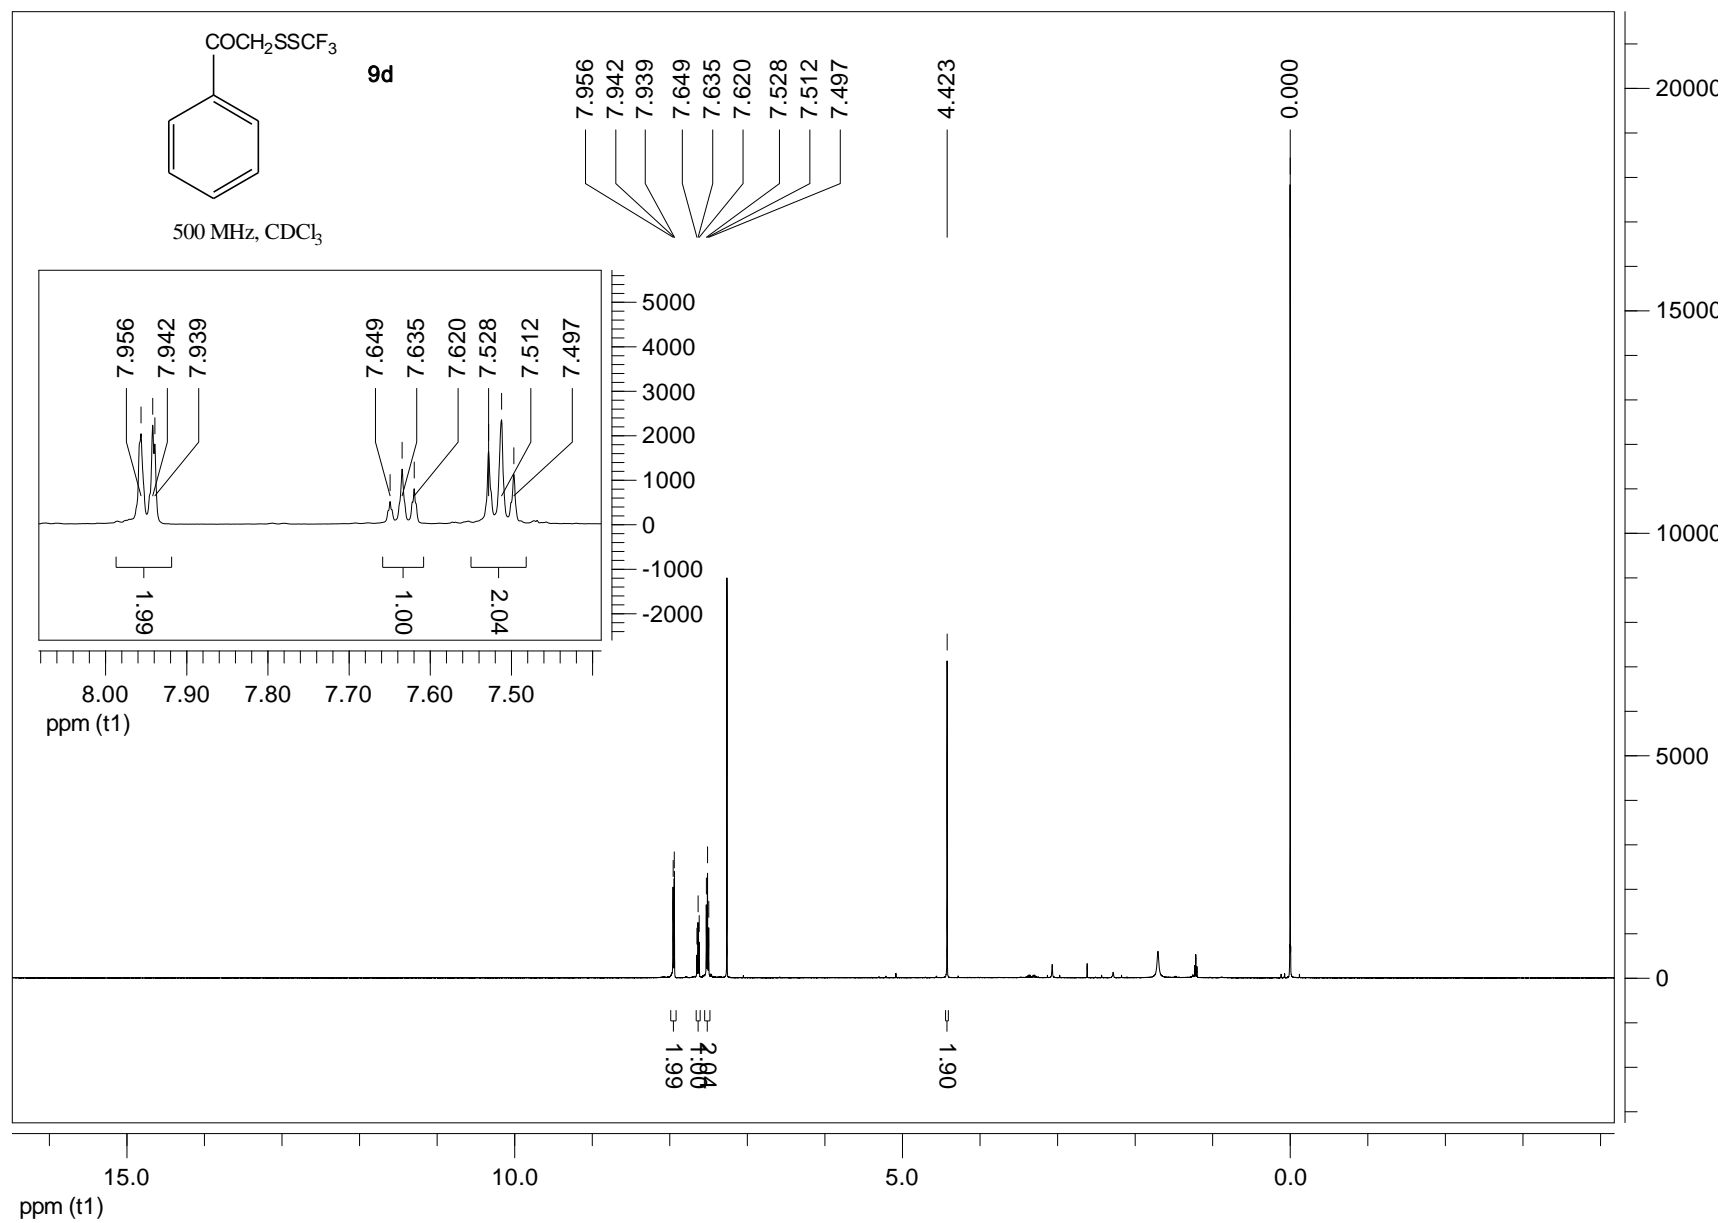

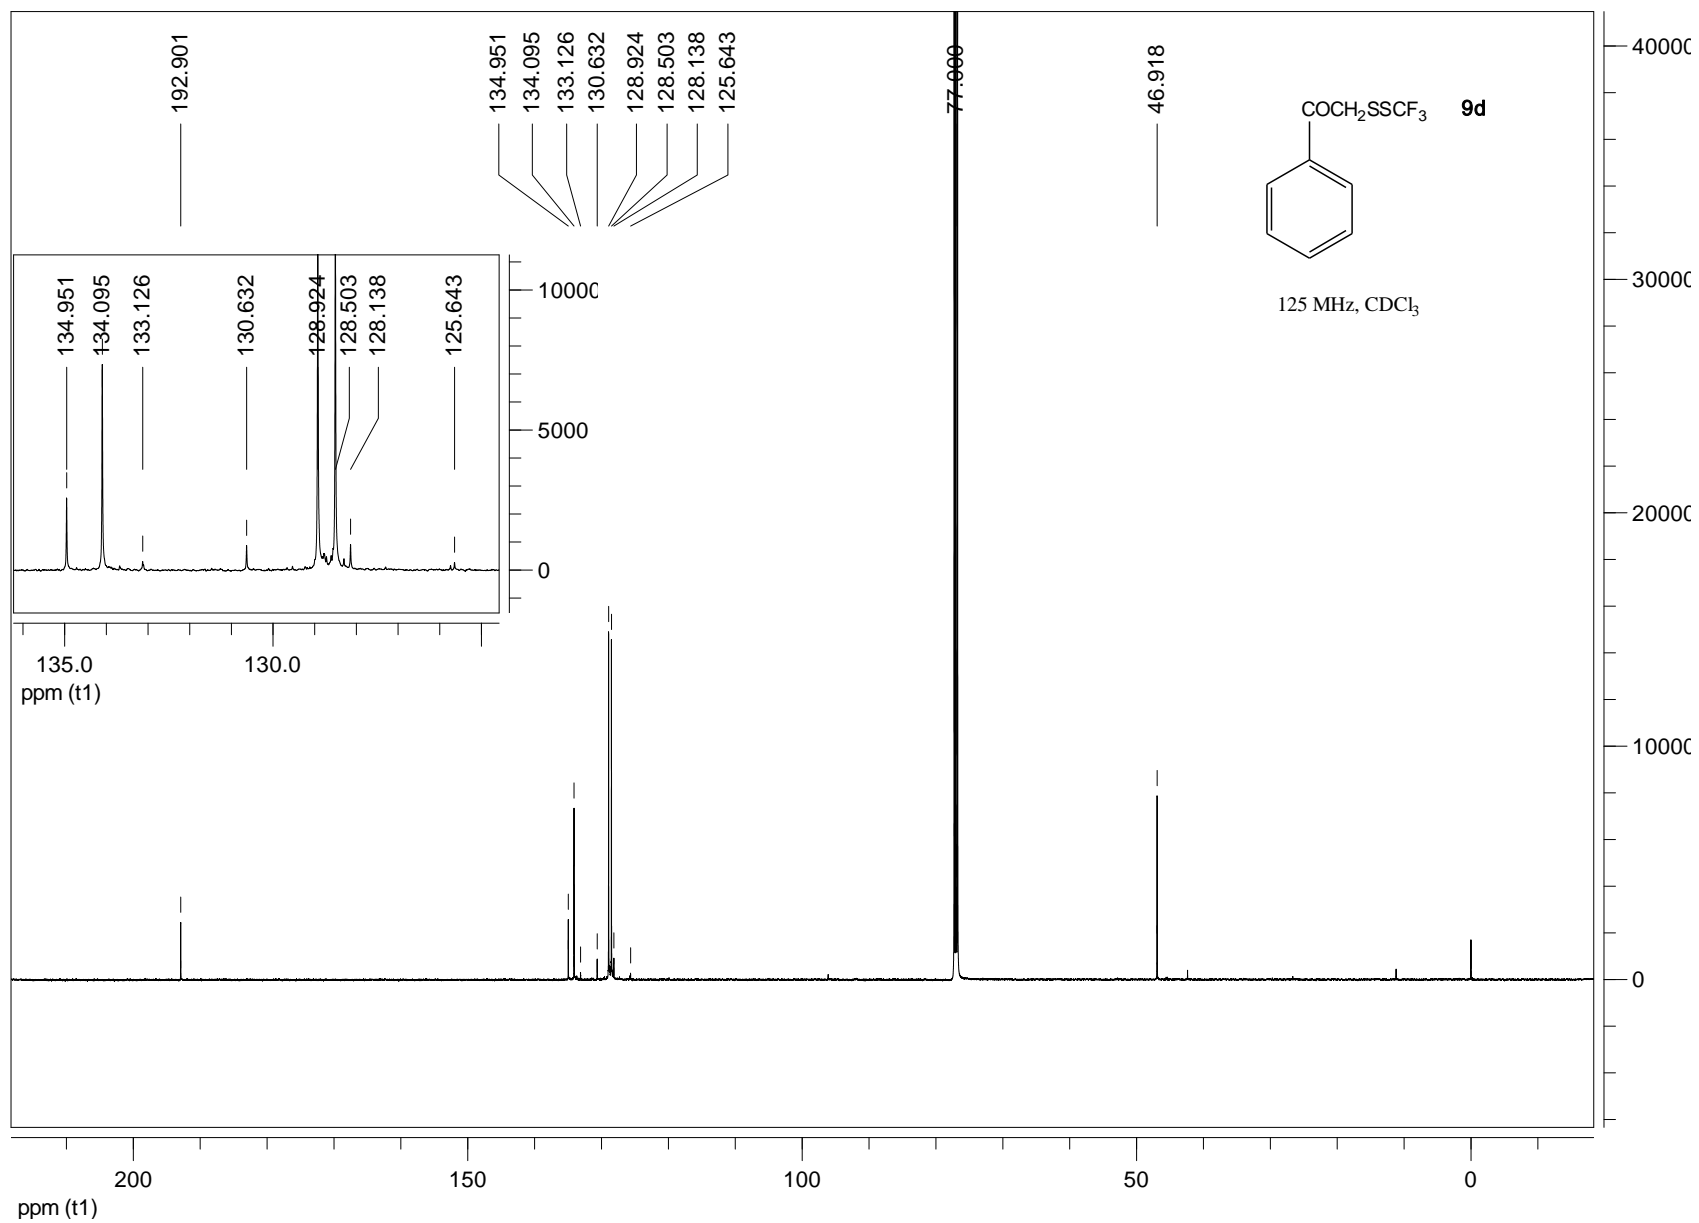

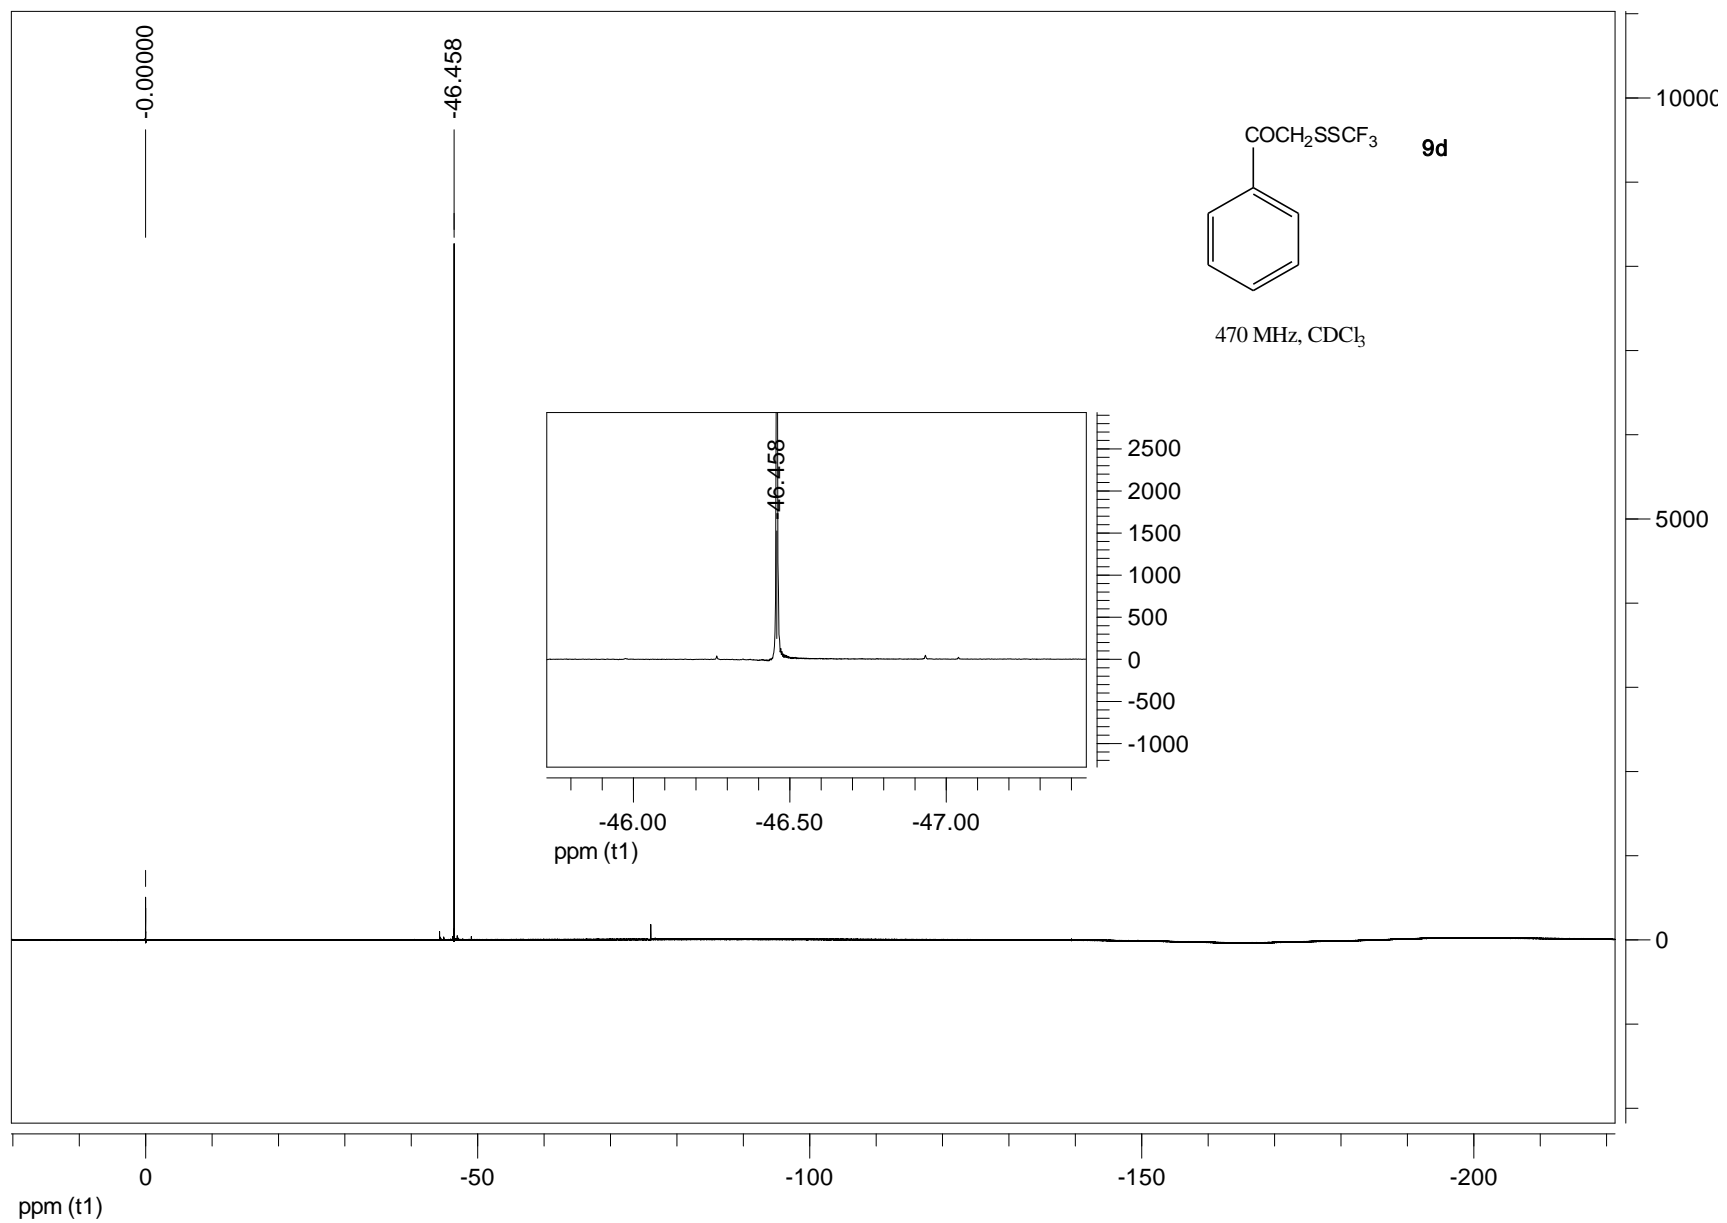

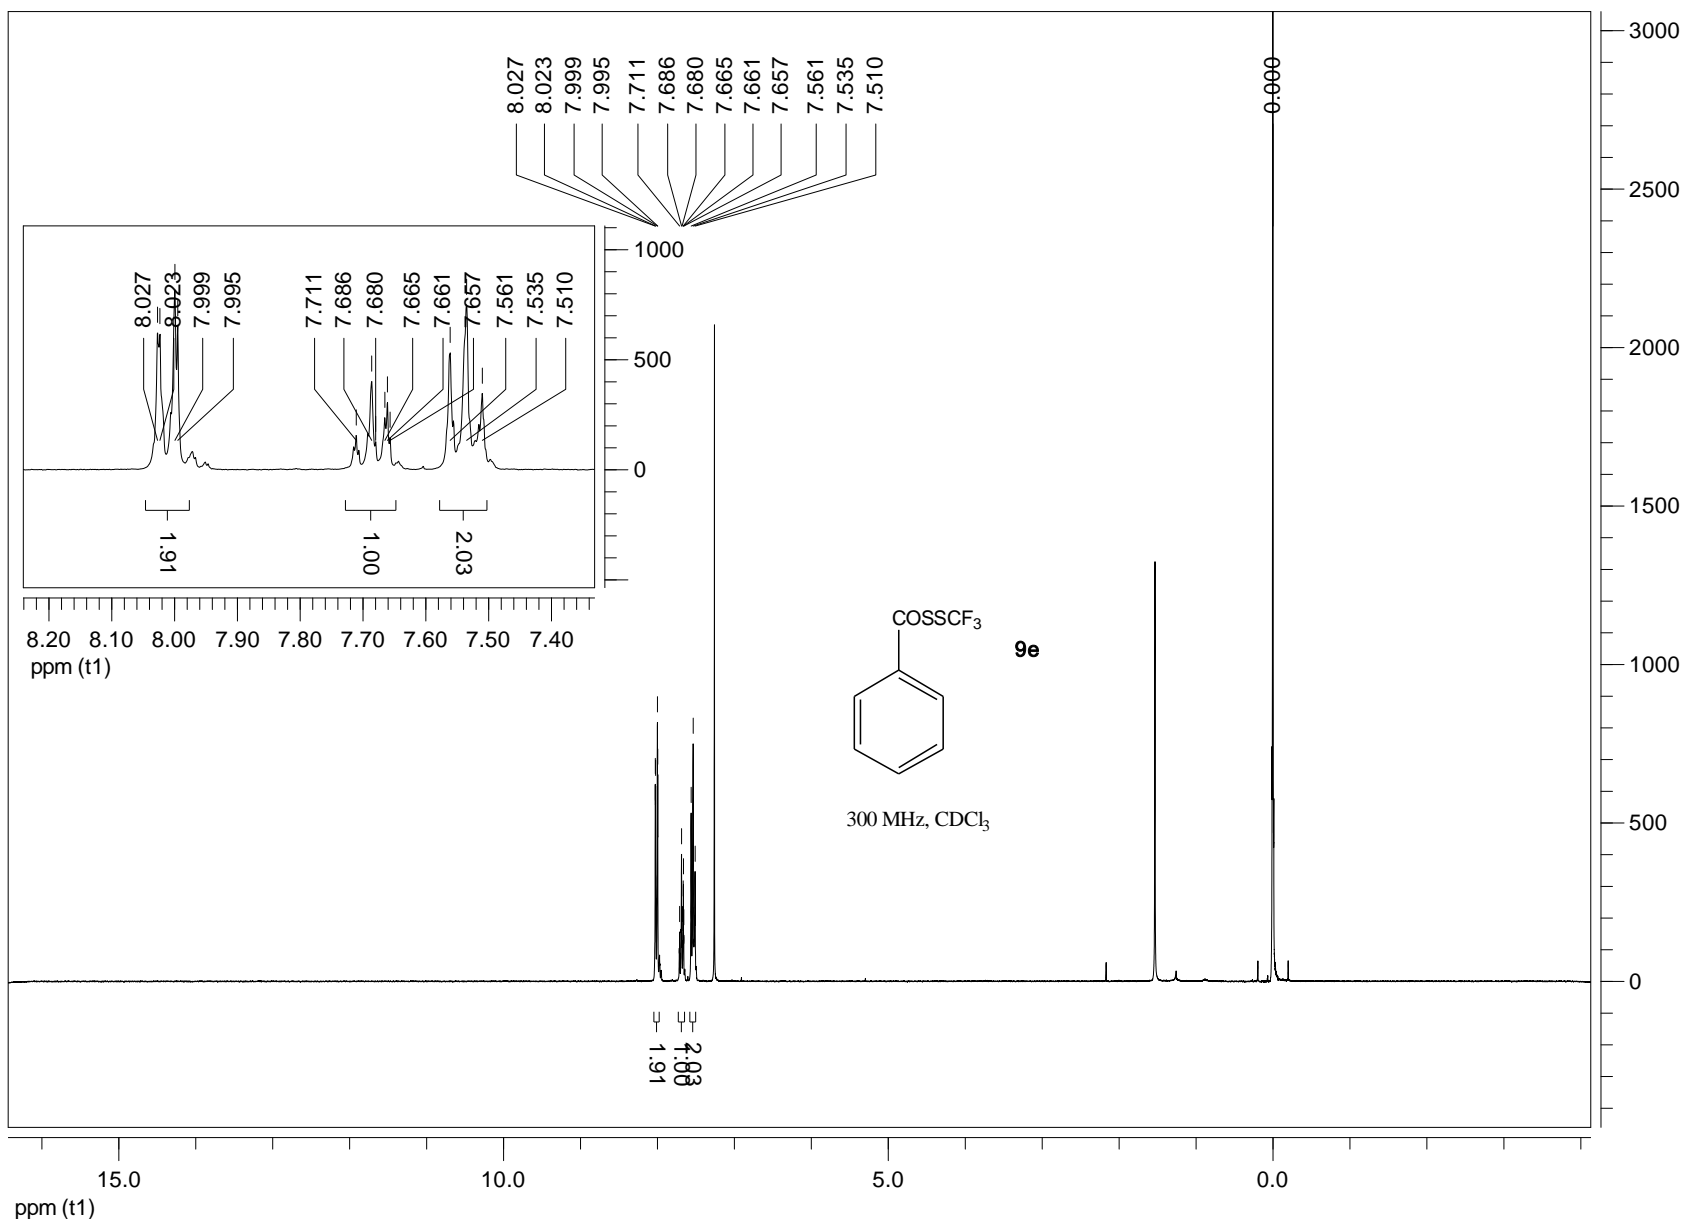

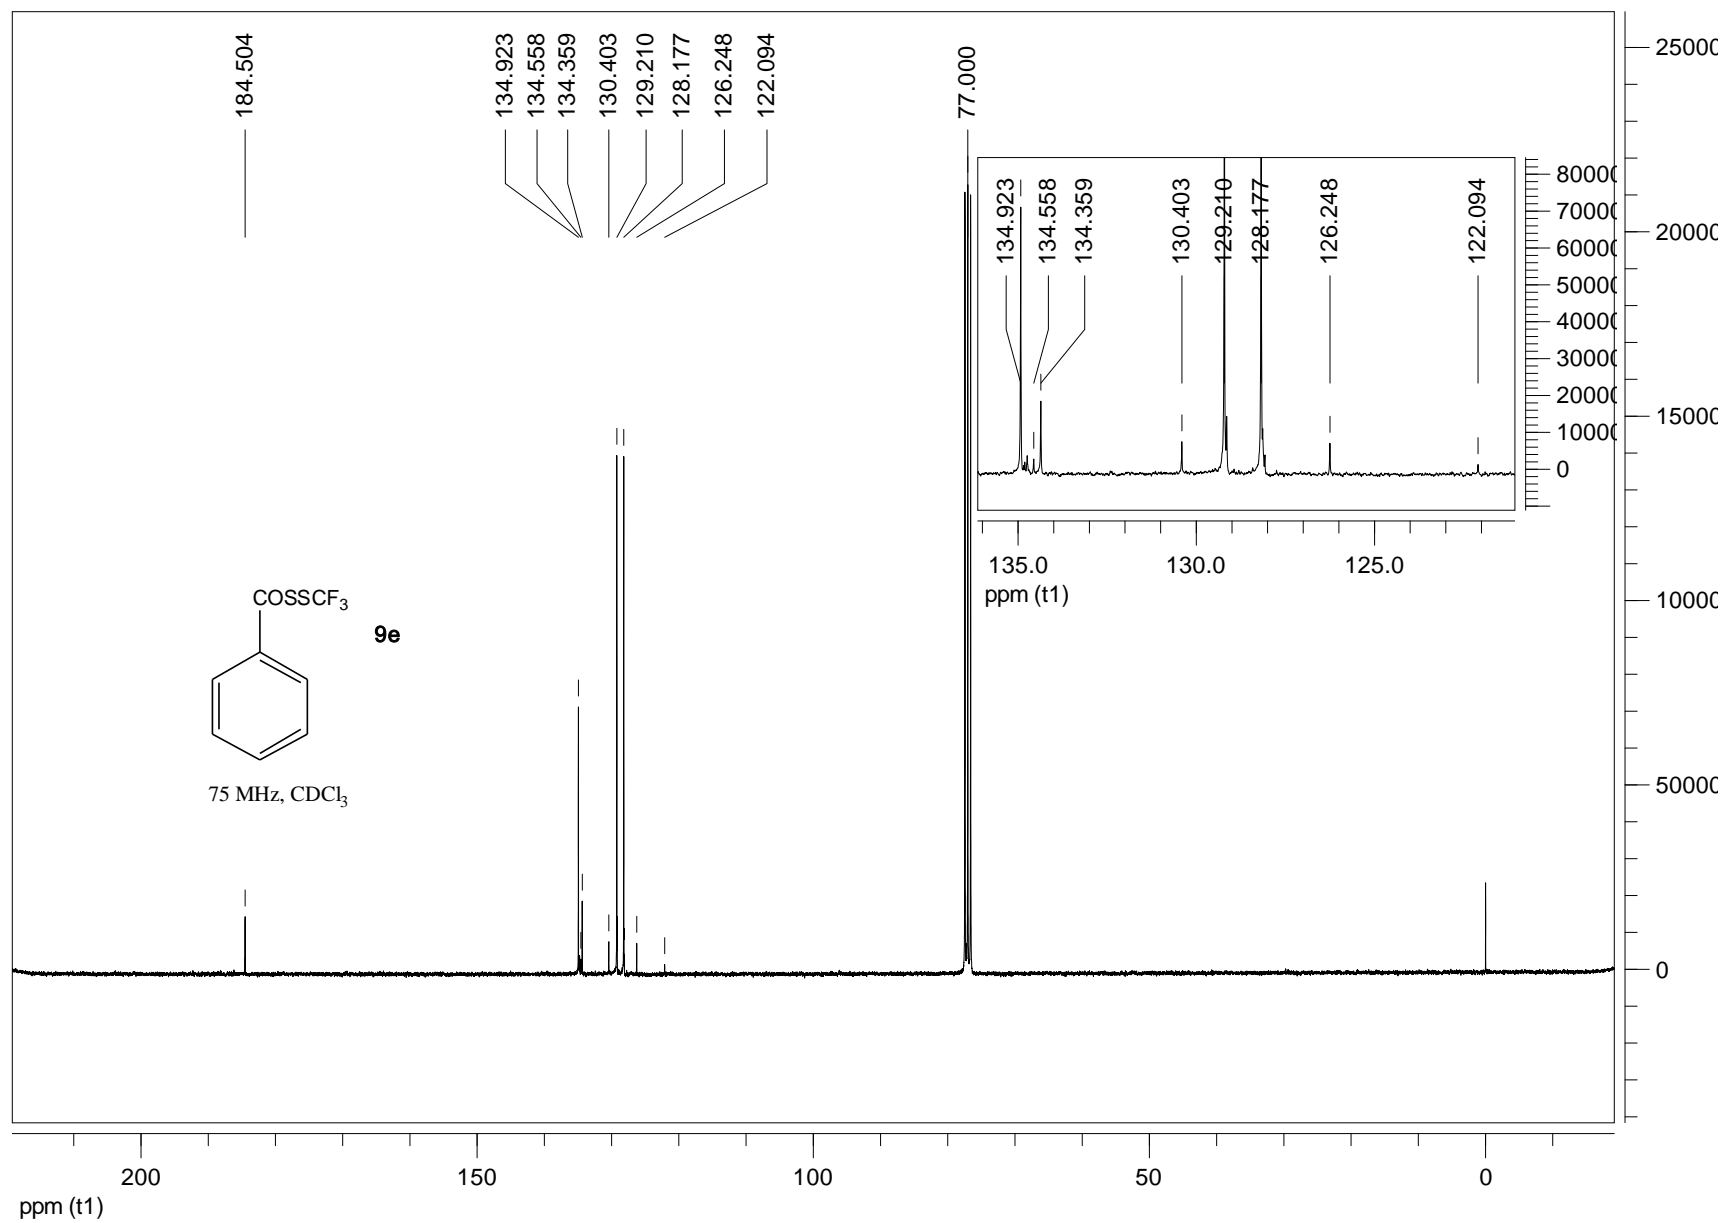



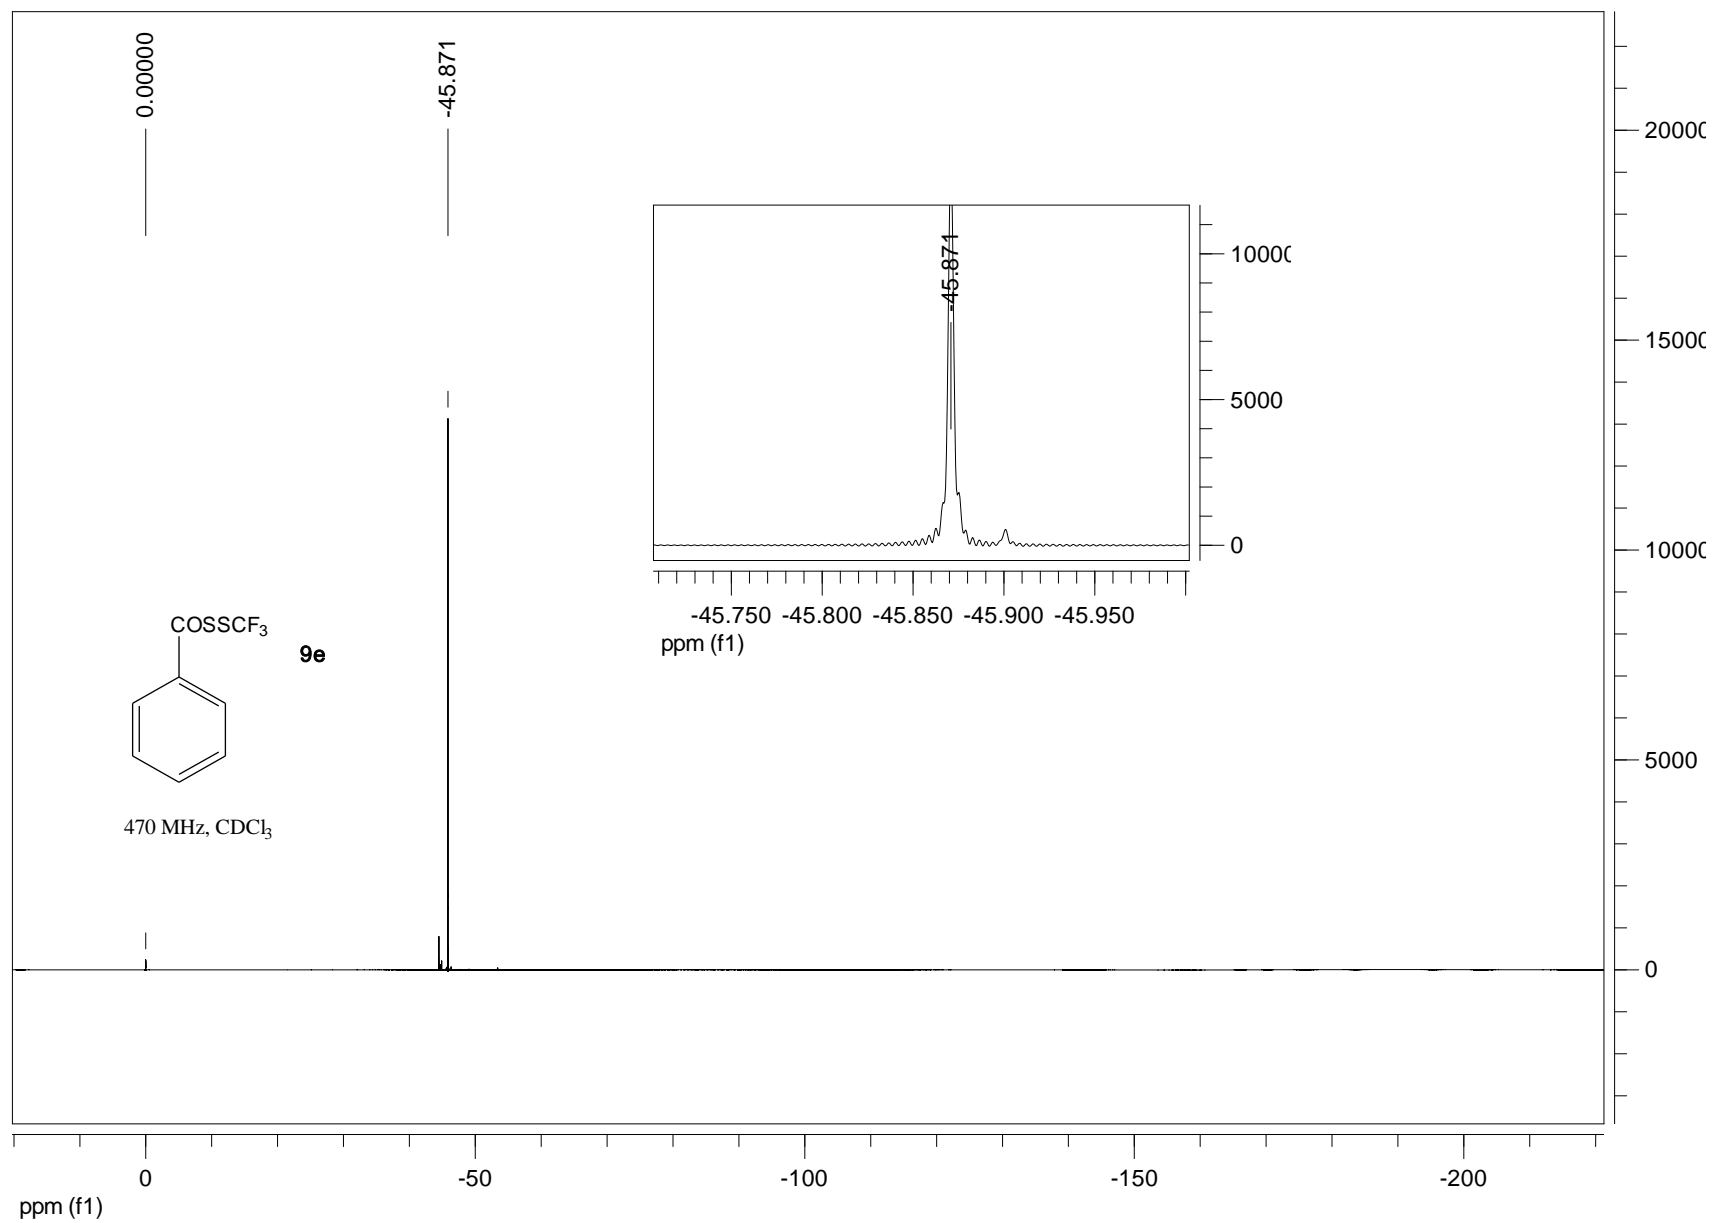

S125

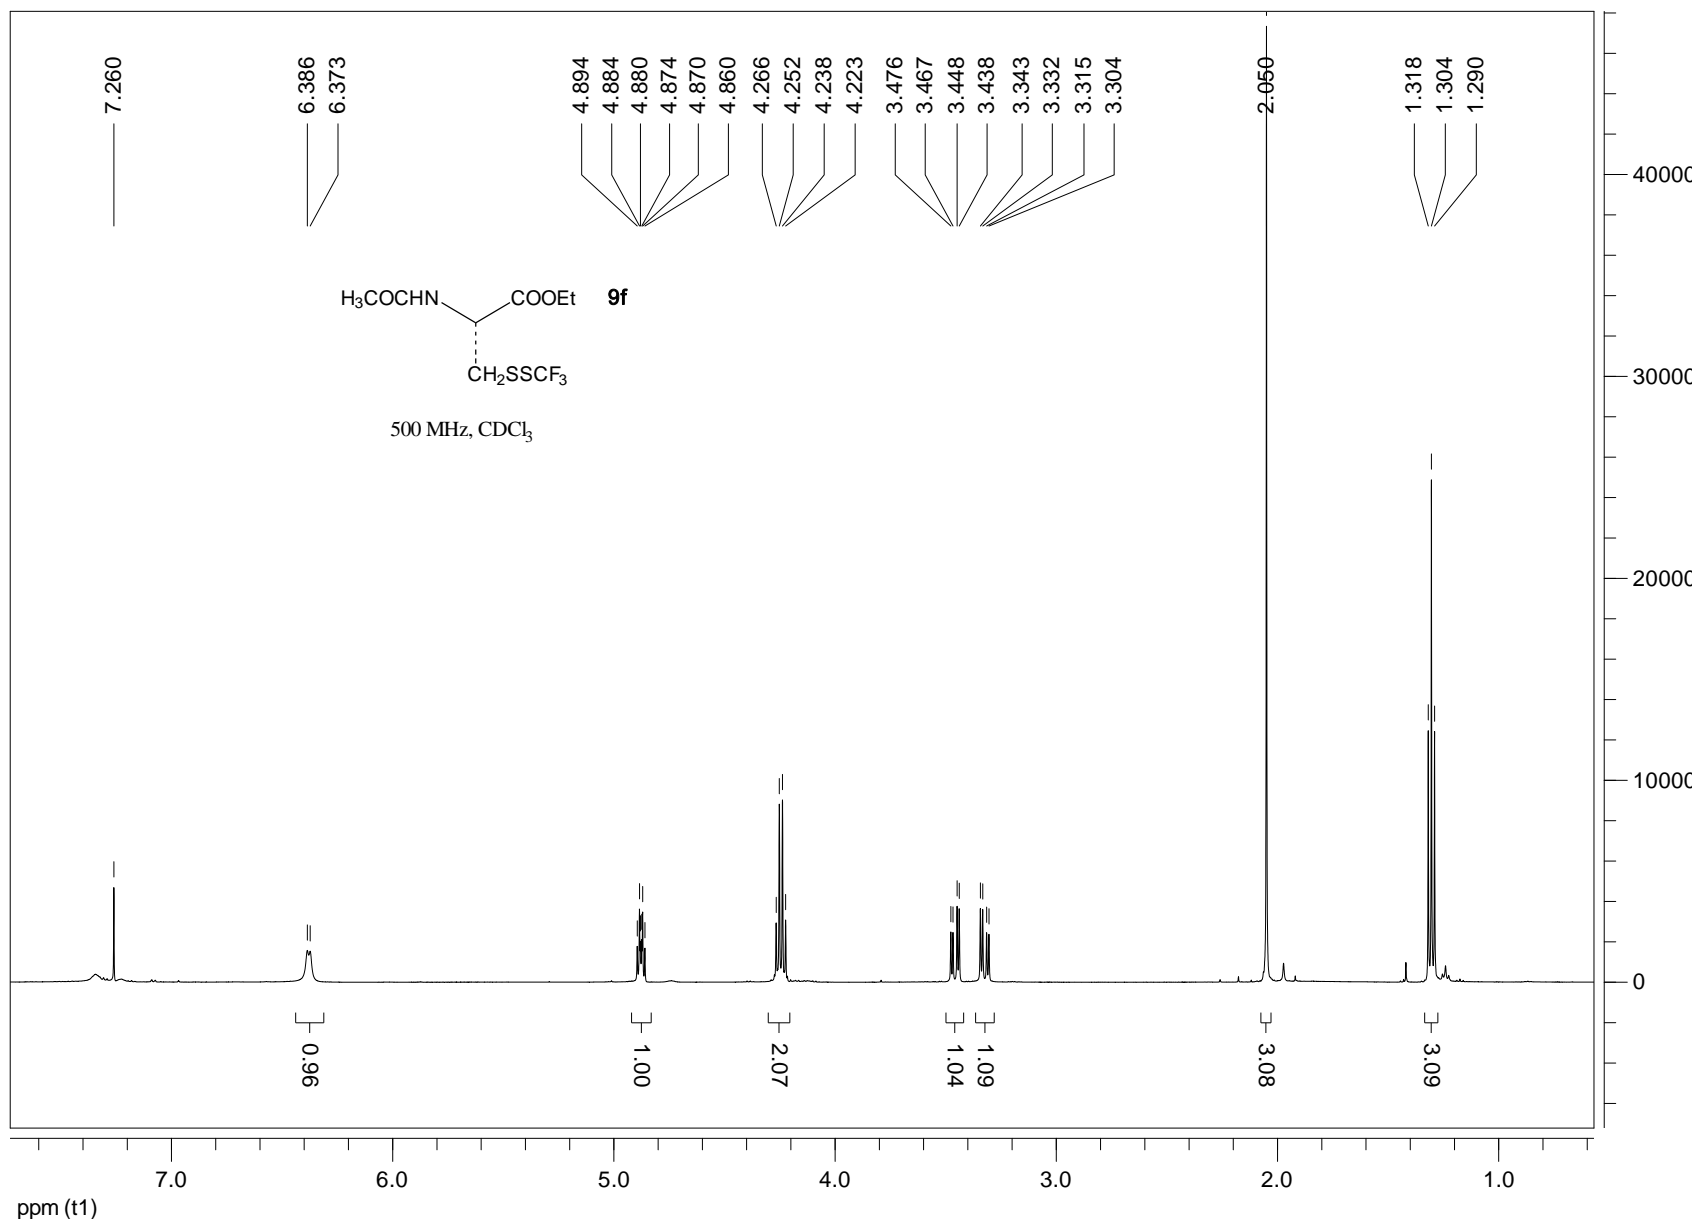

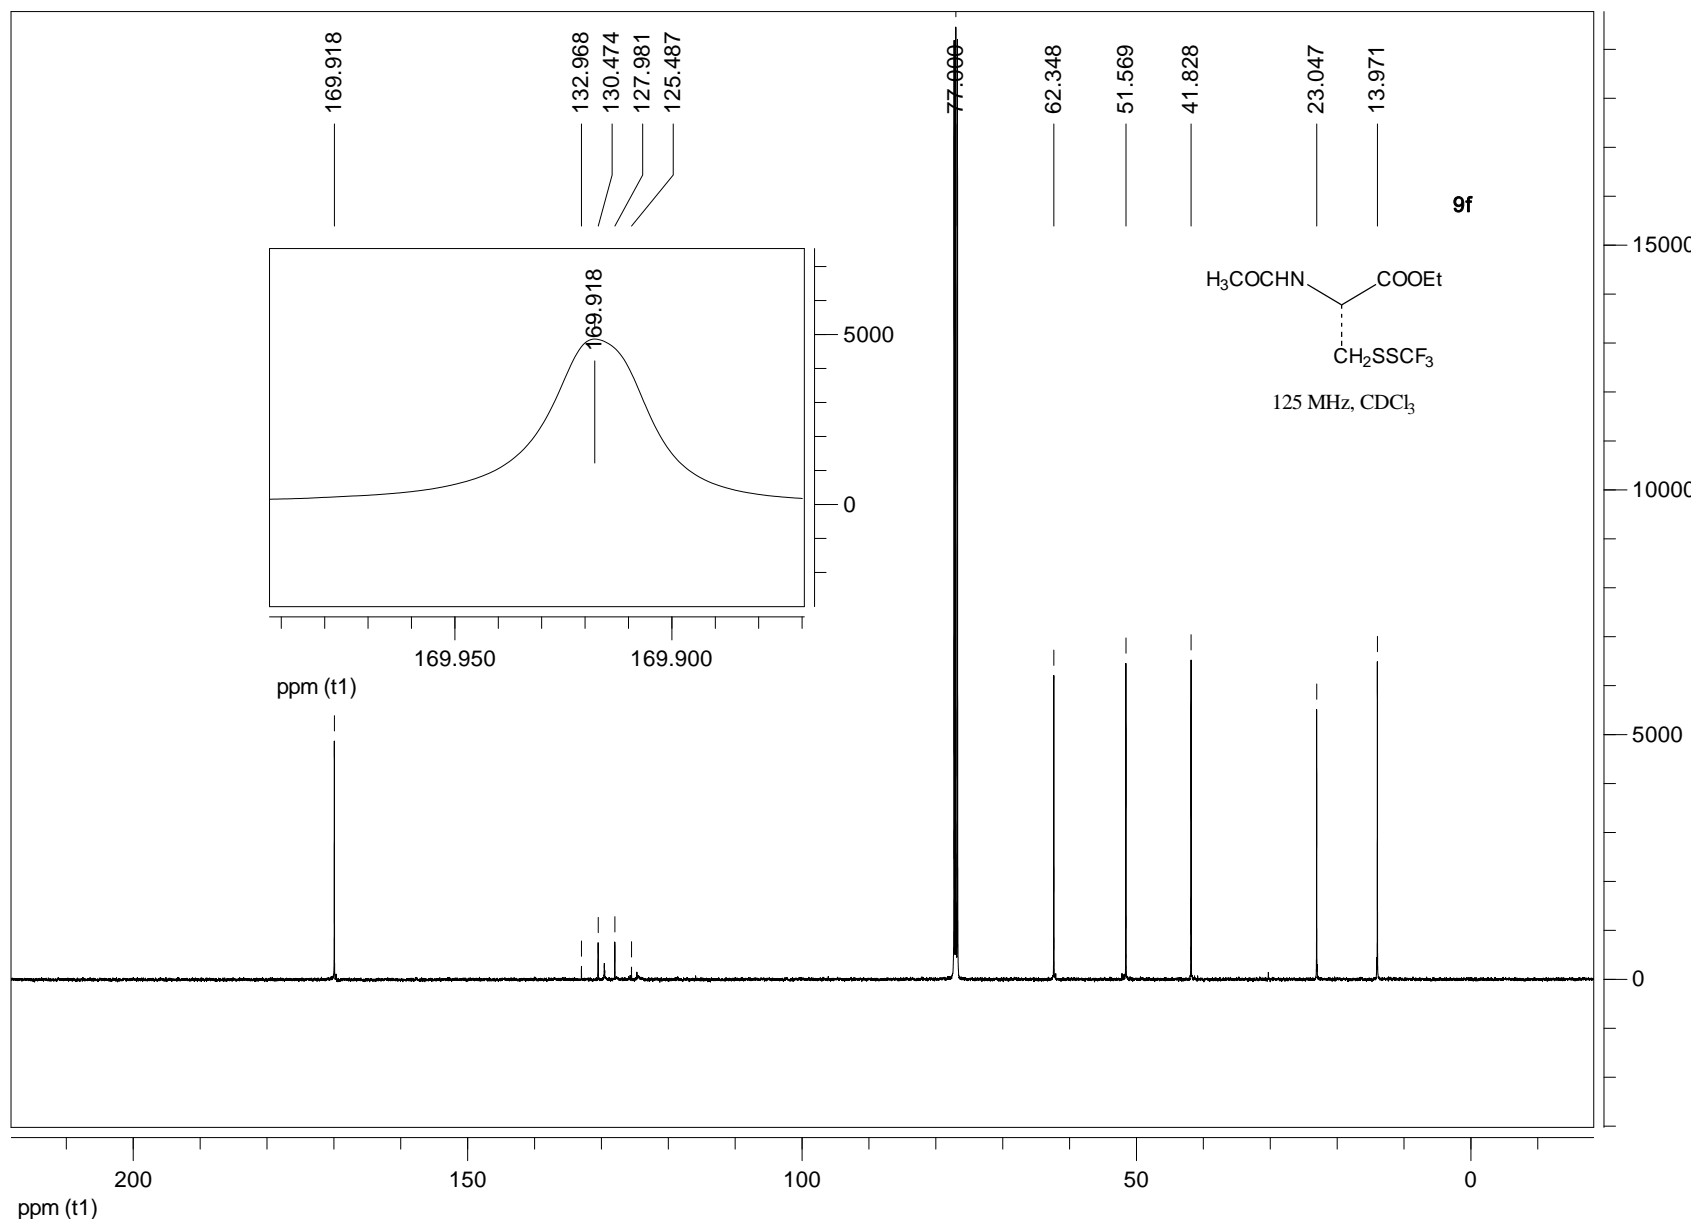

S127

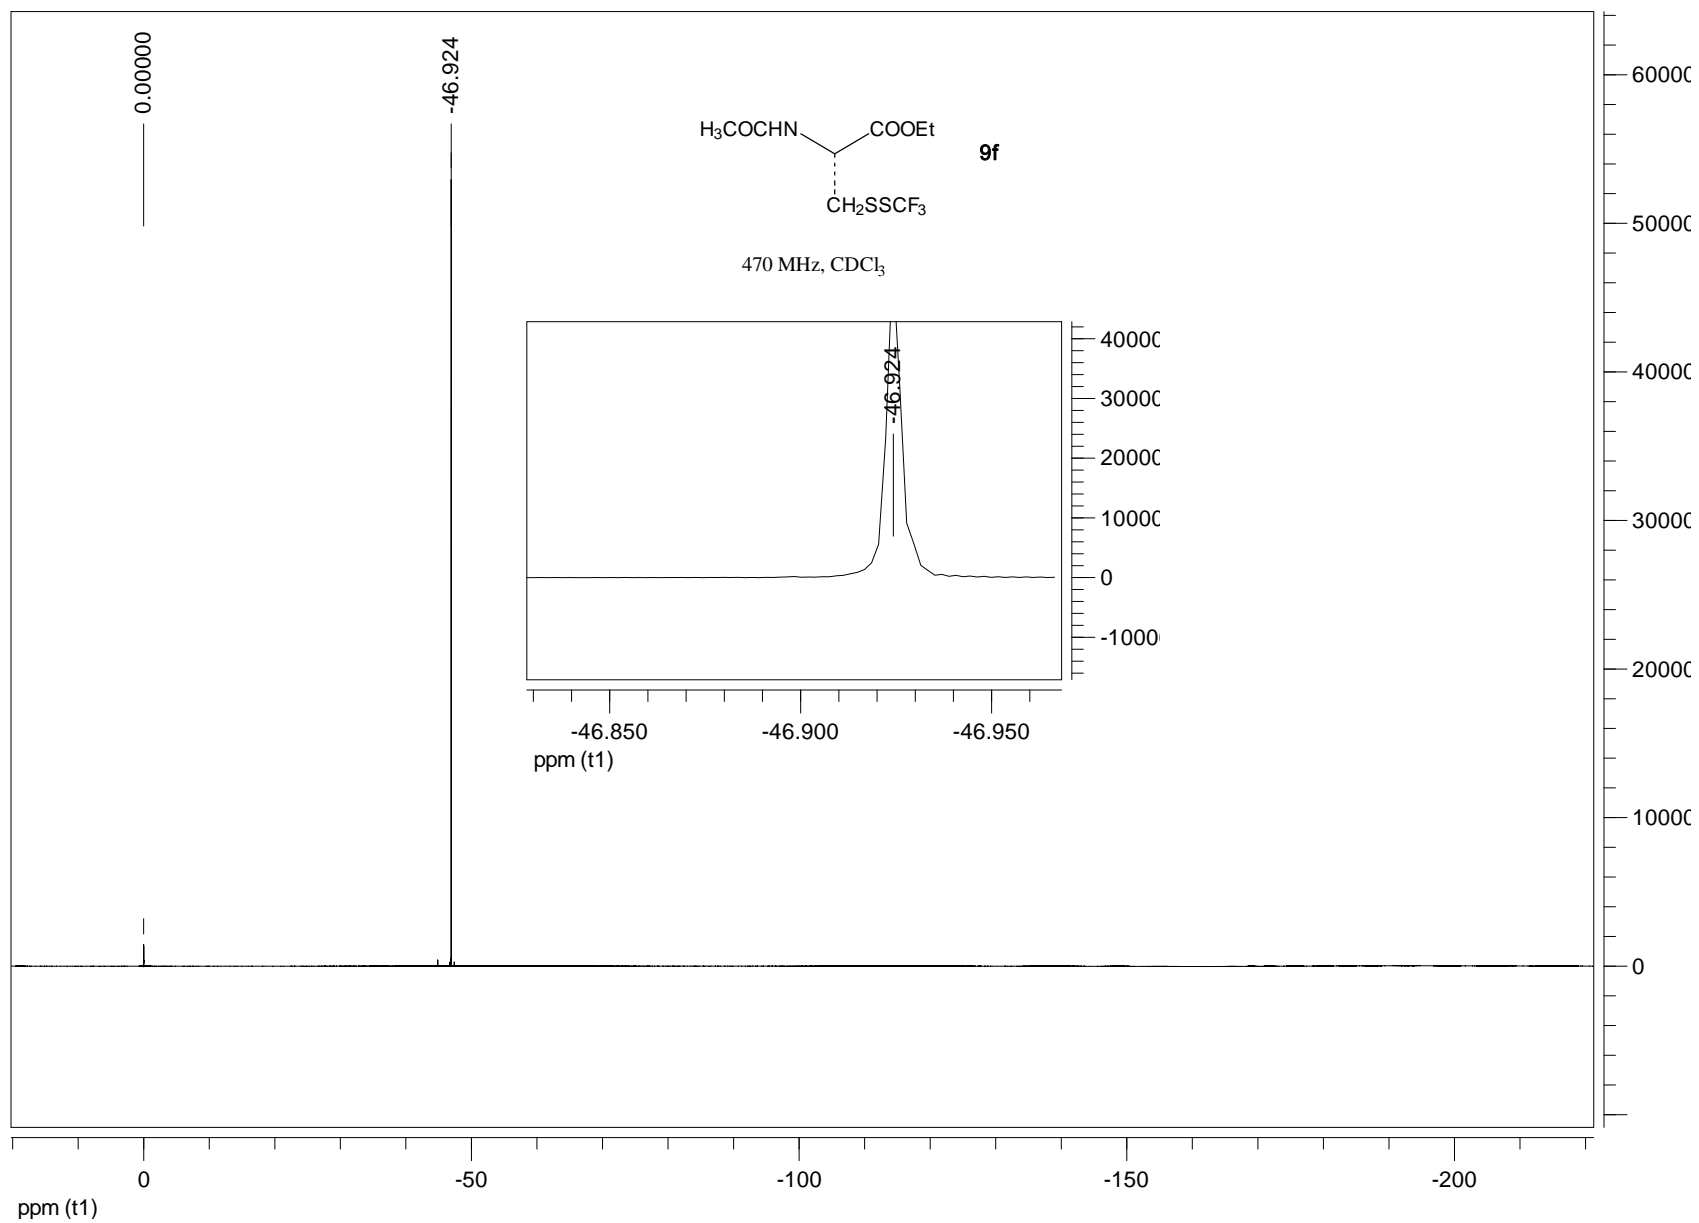

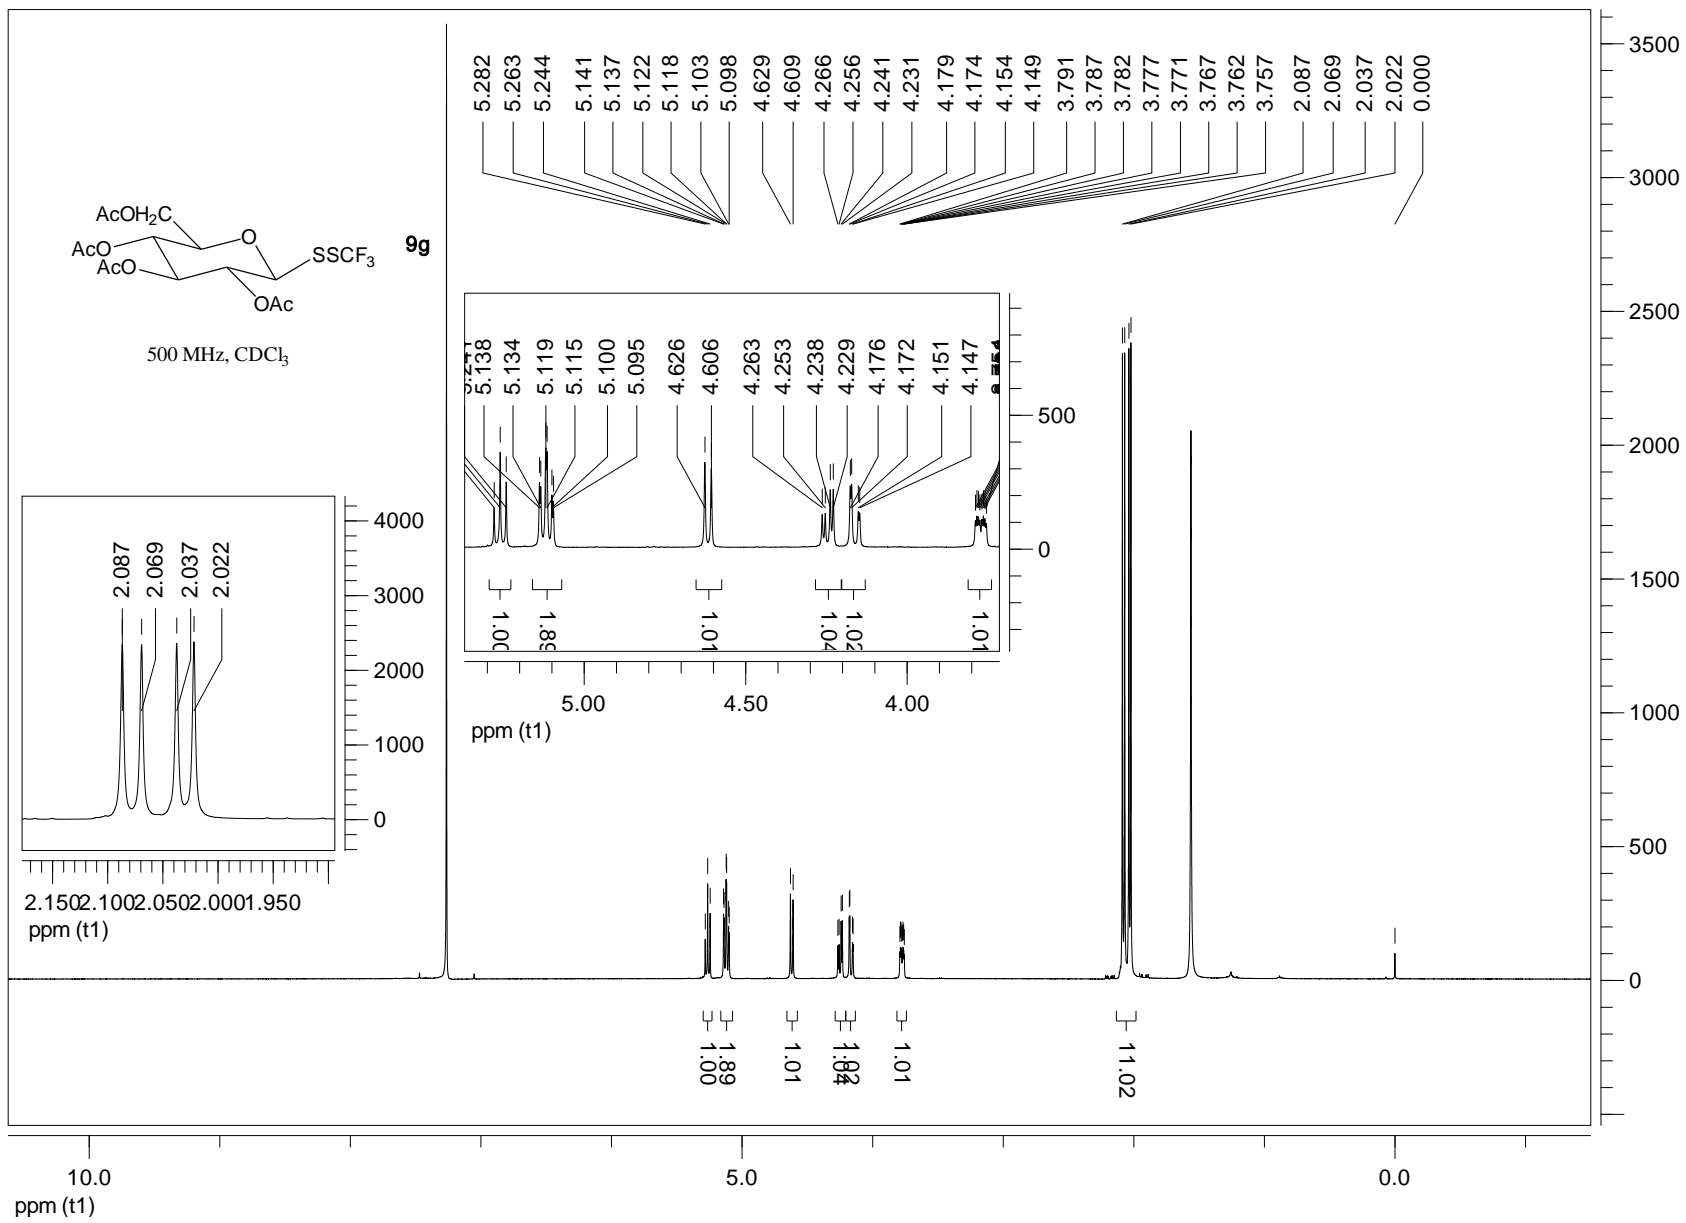

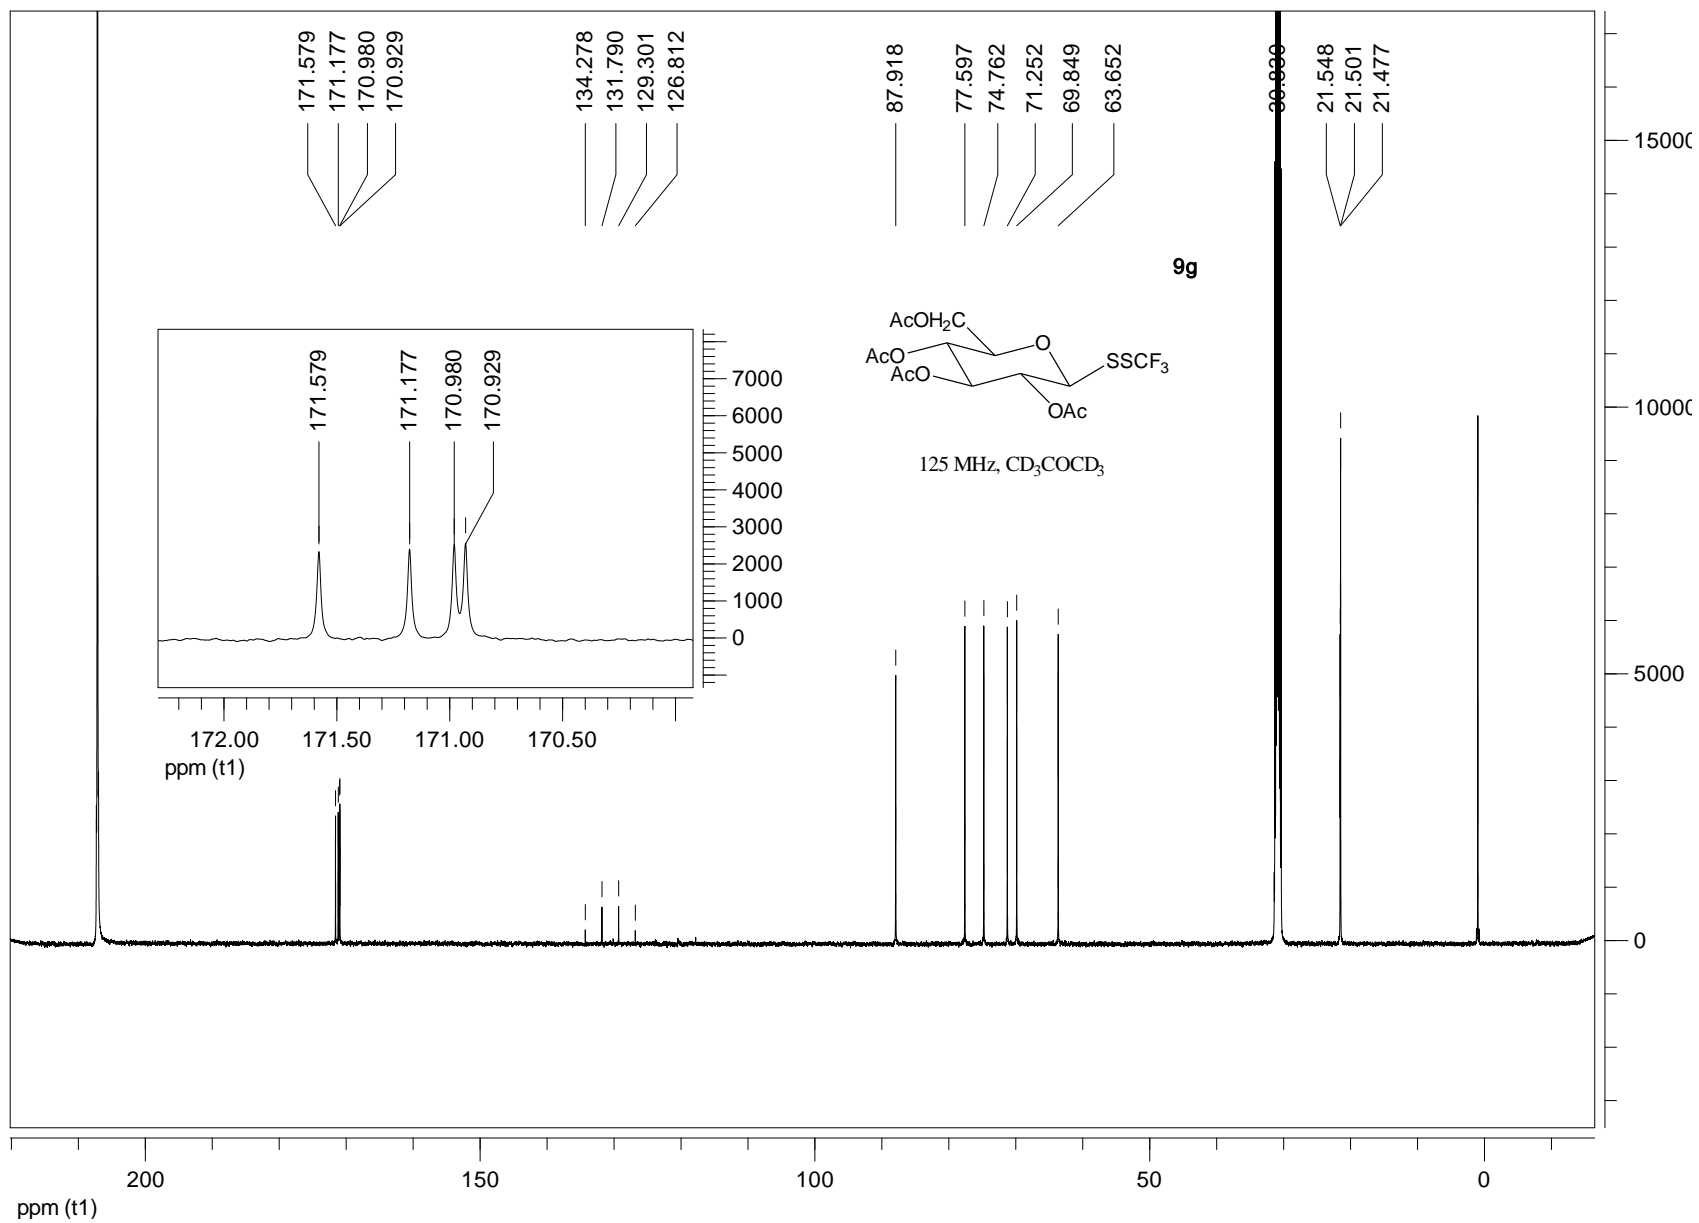

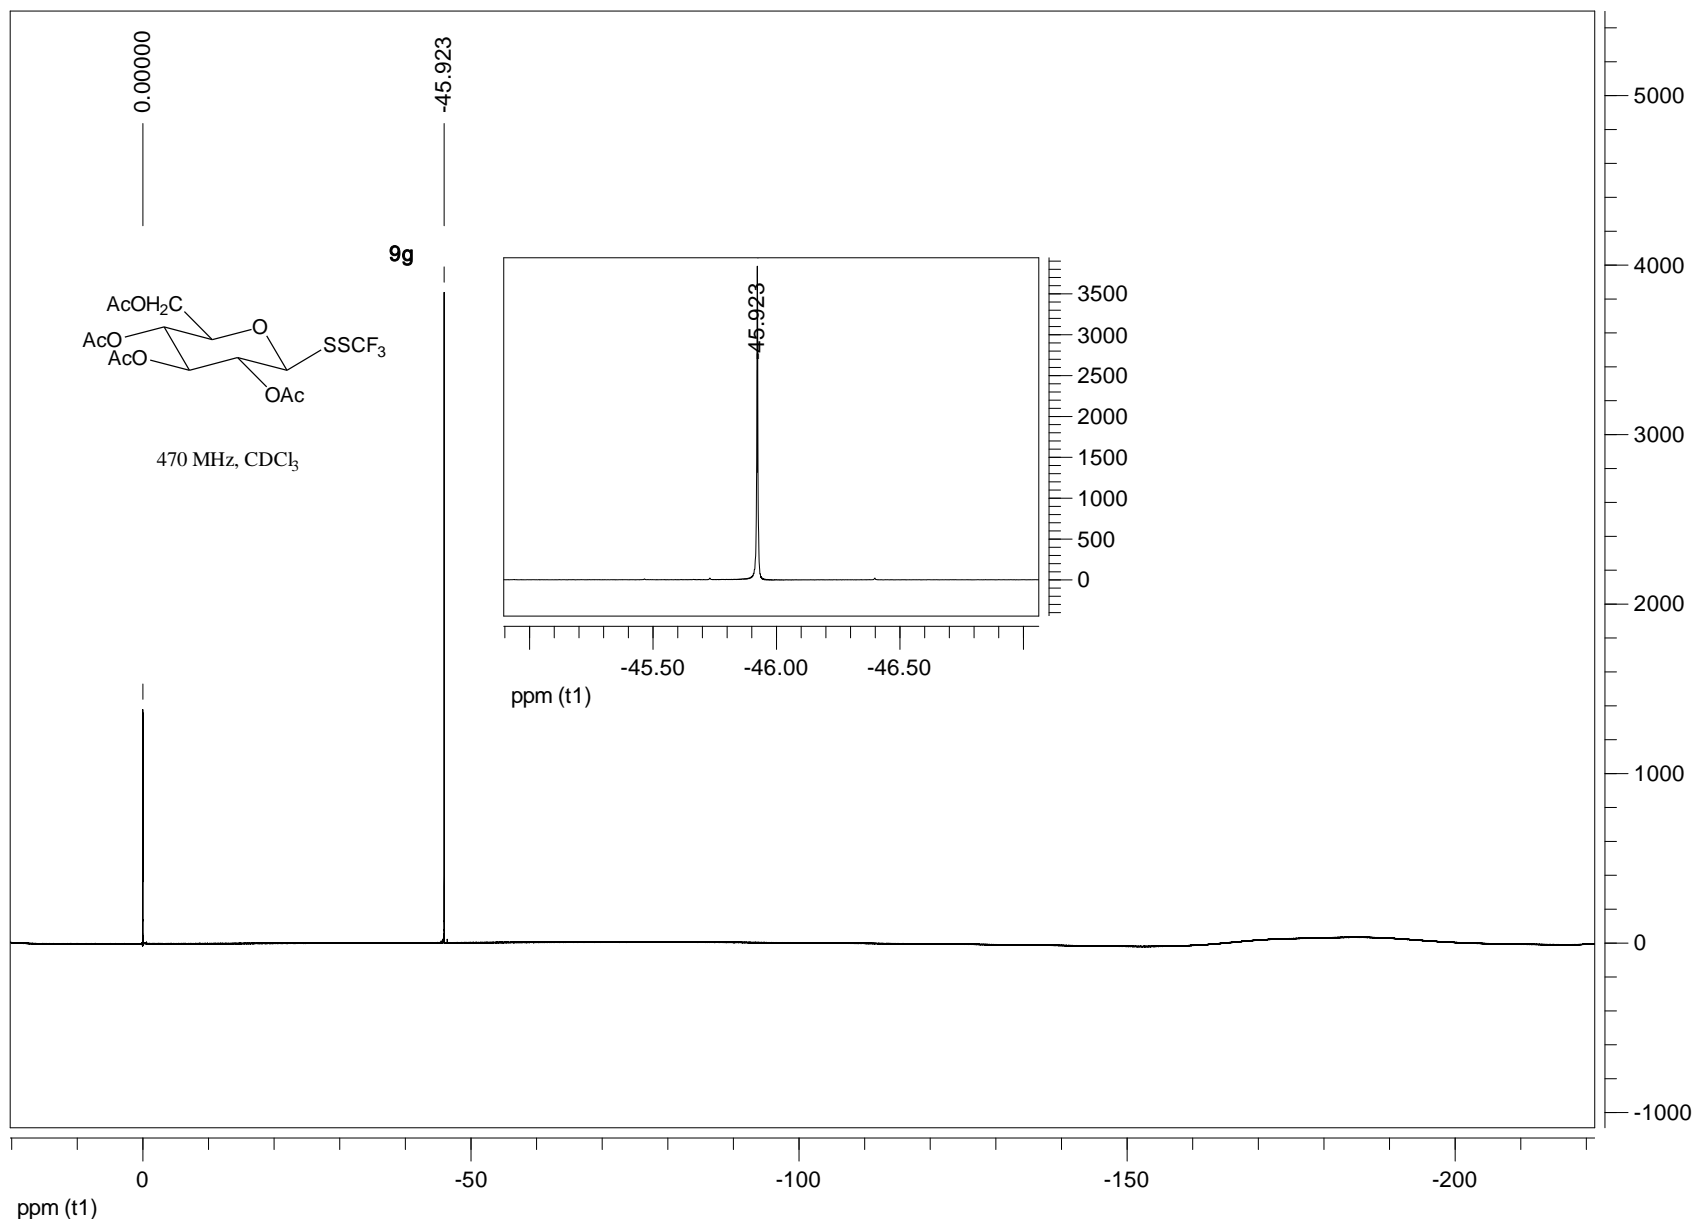

S131

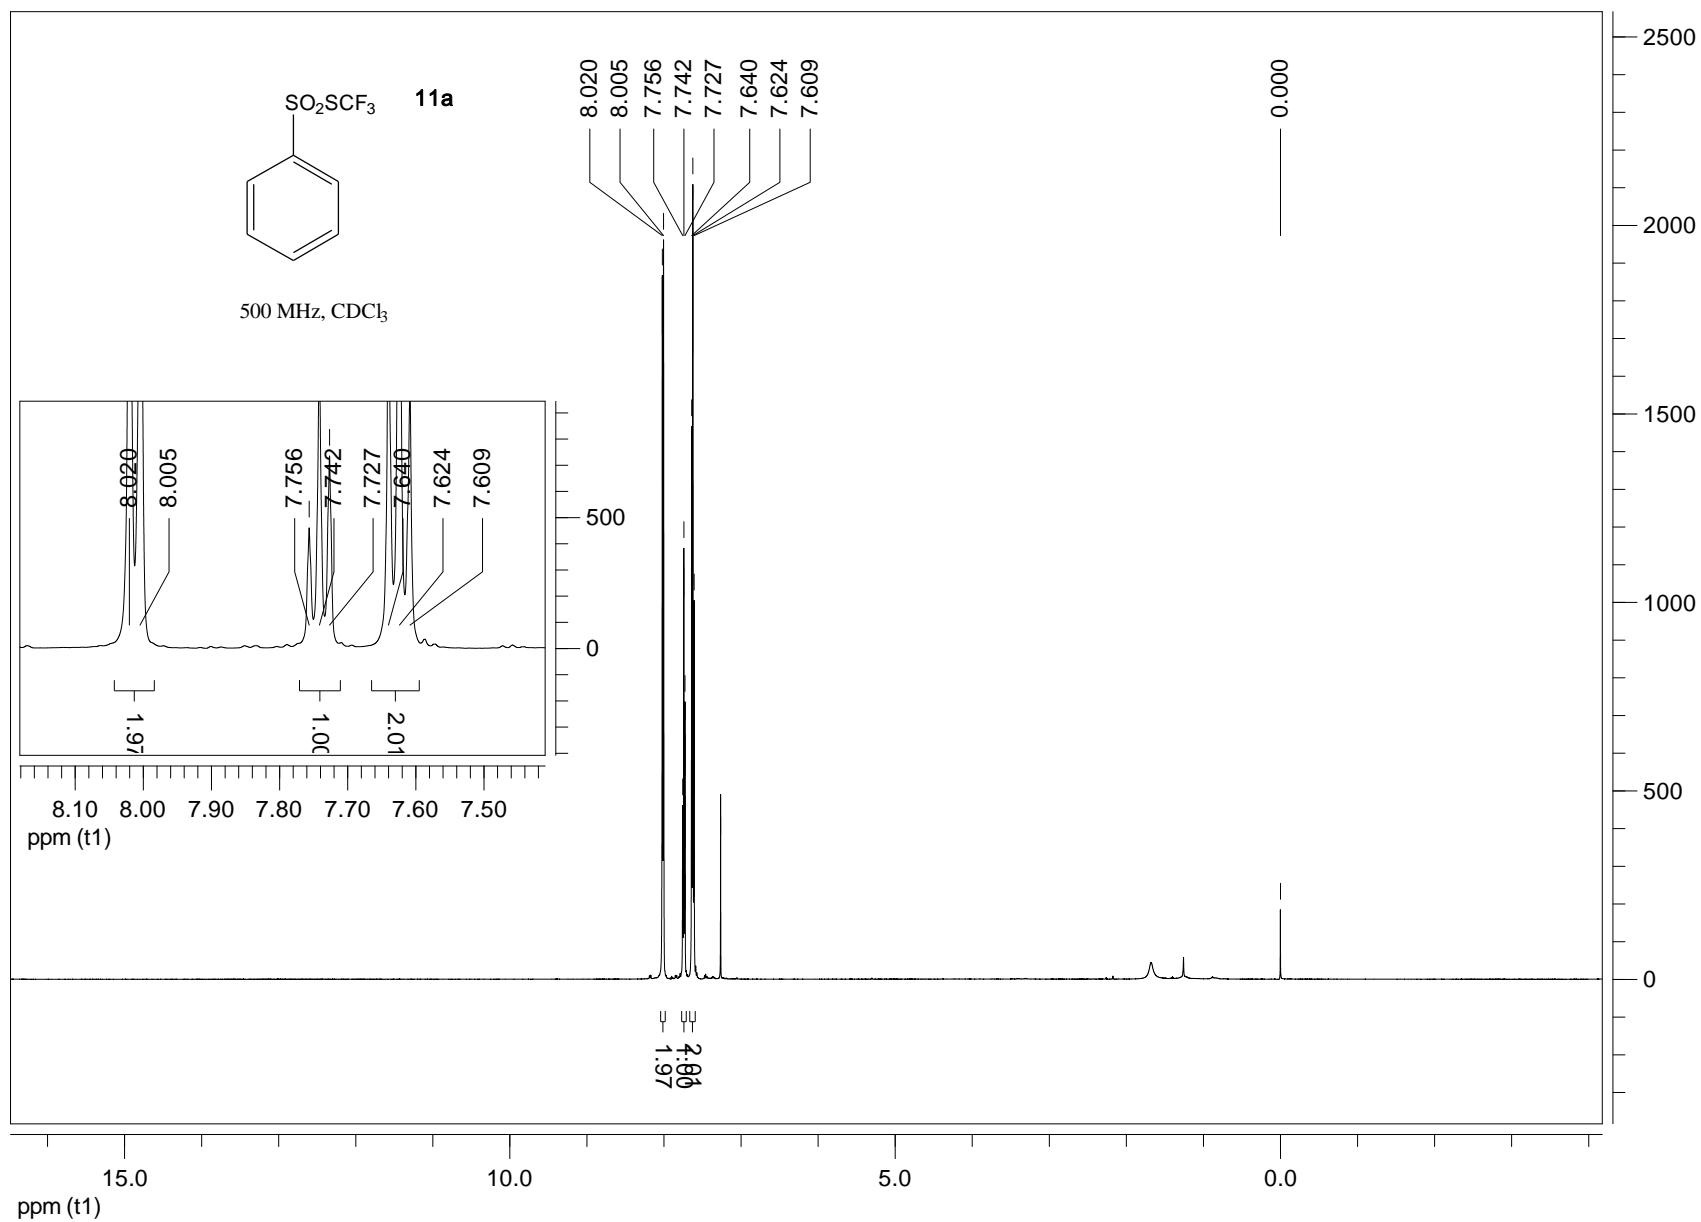



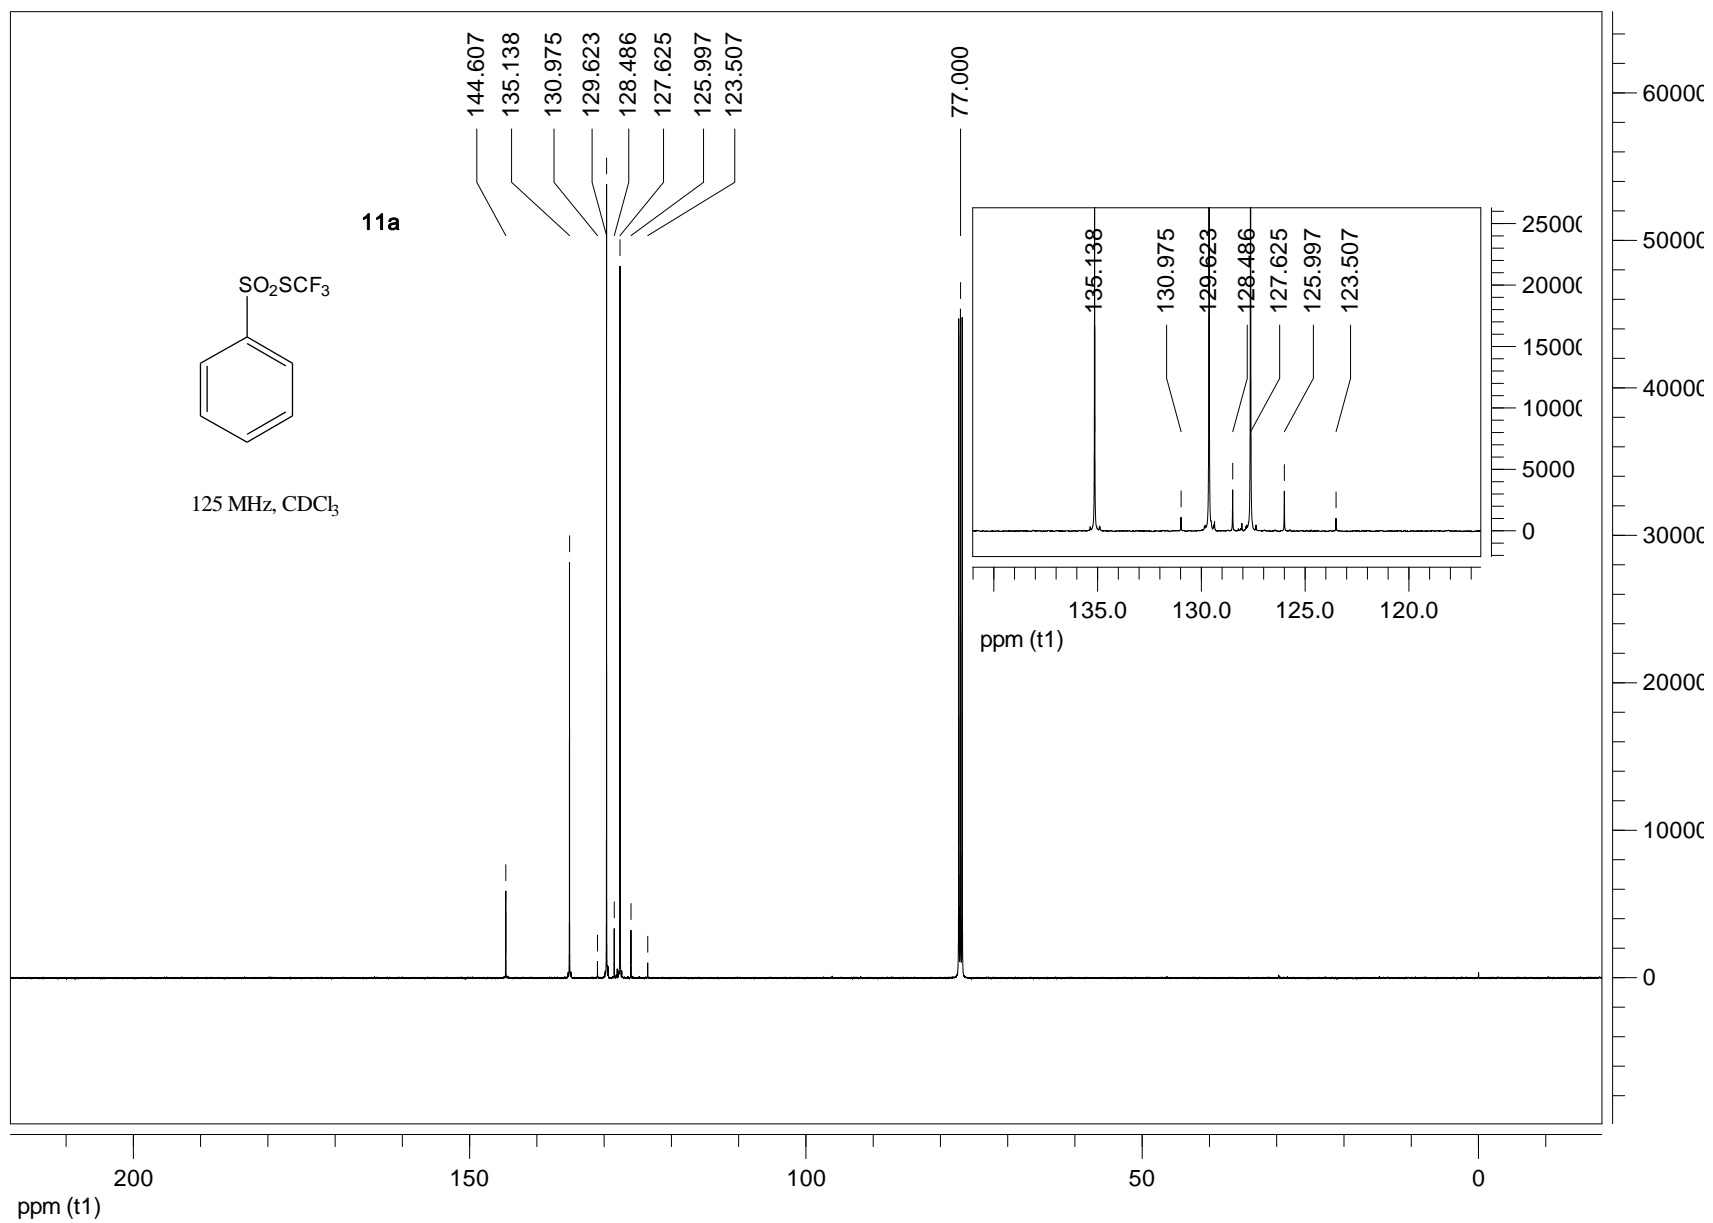

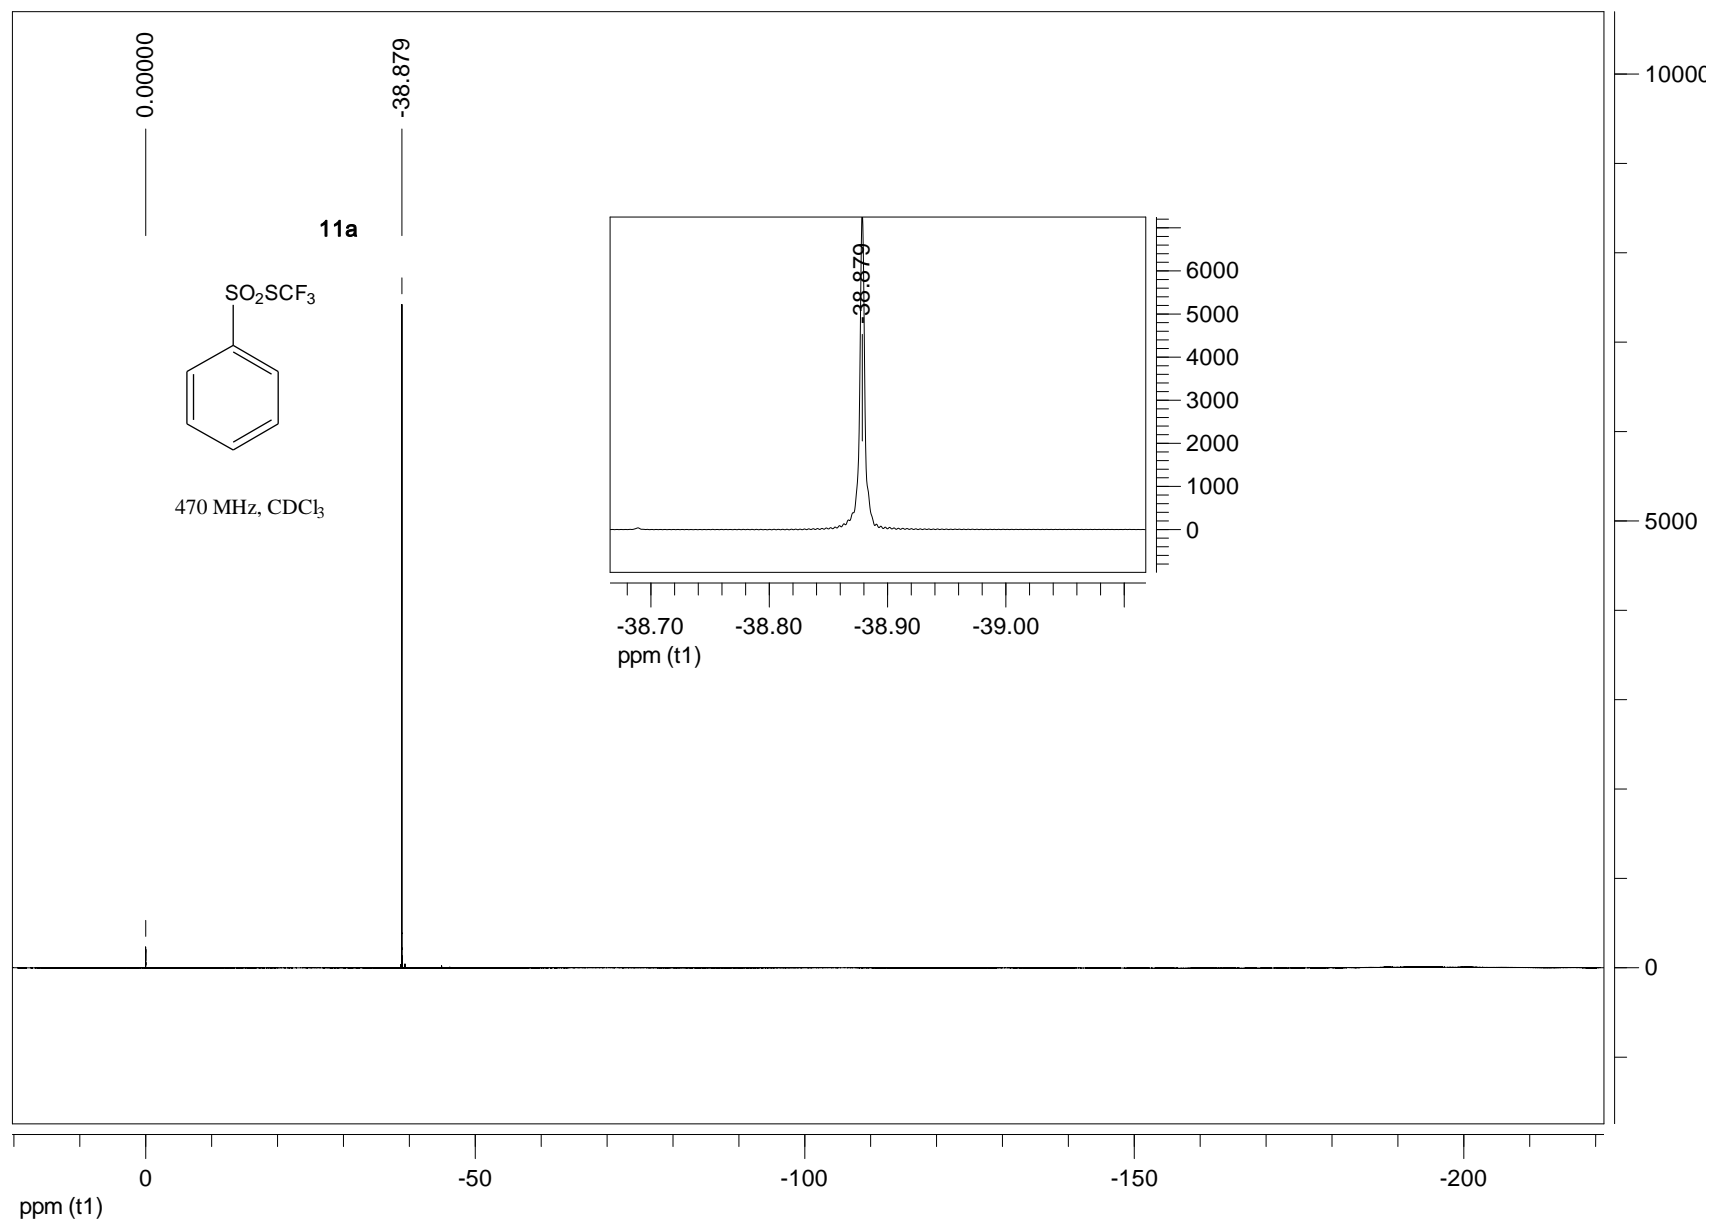

S134

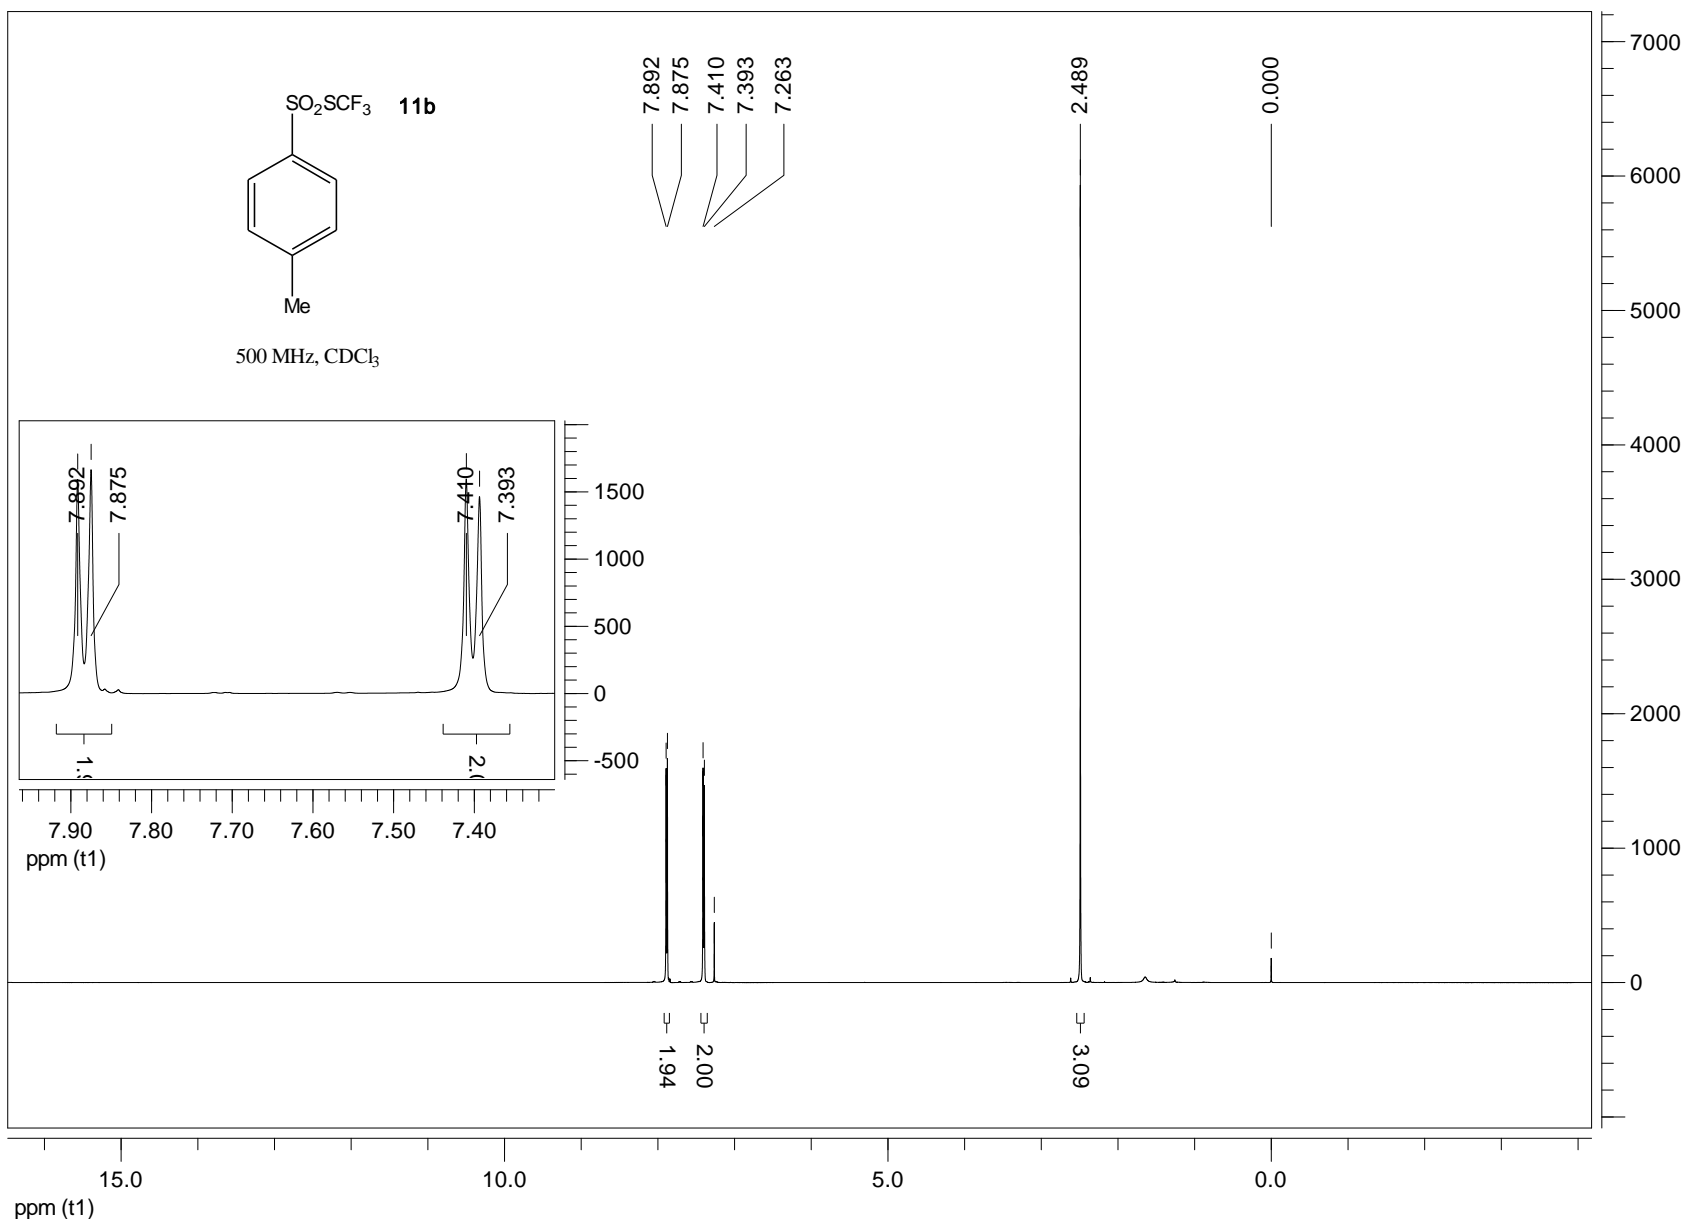

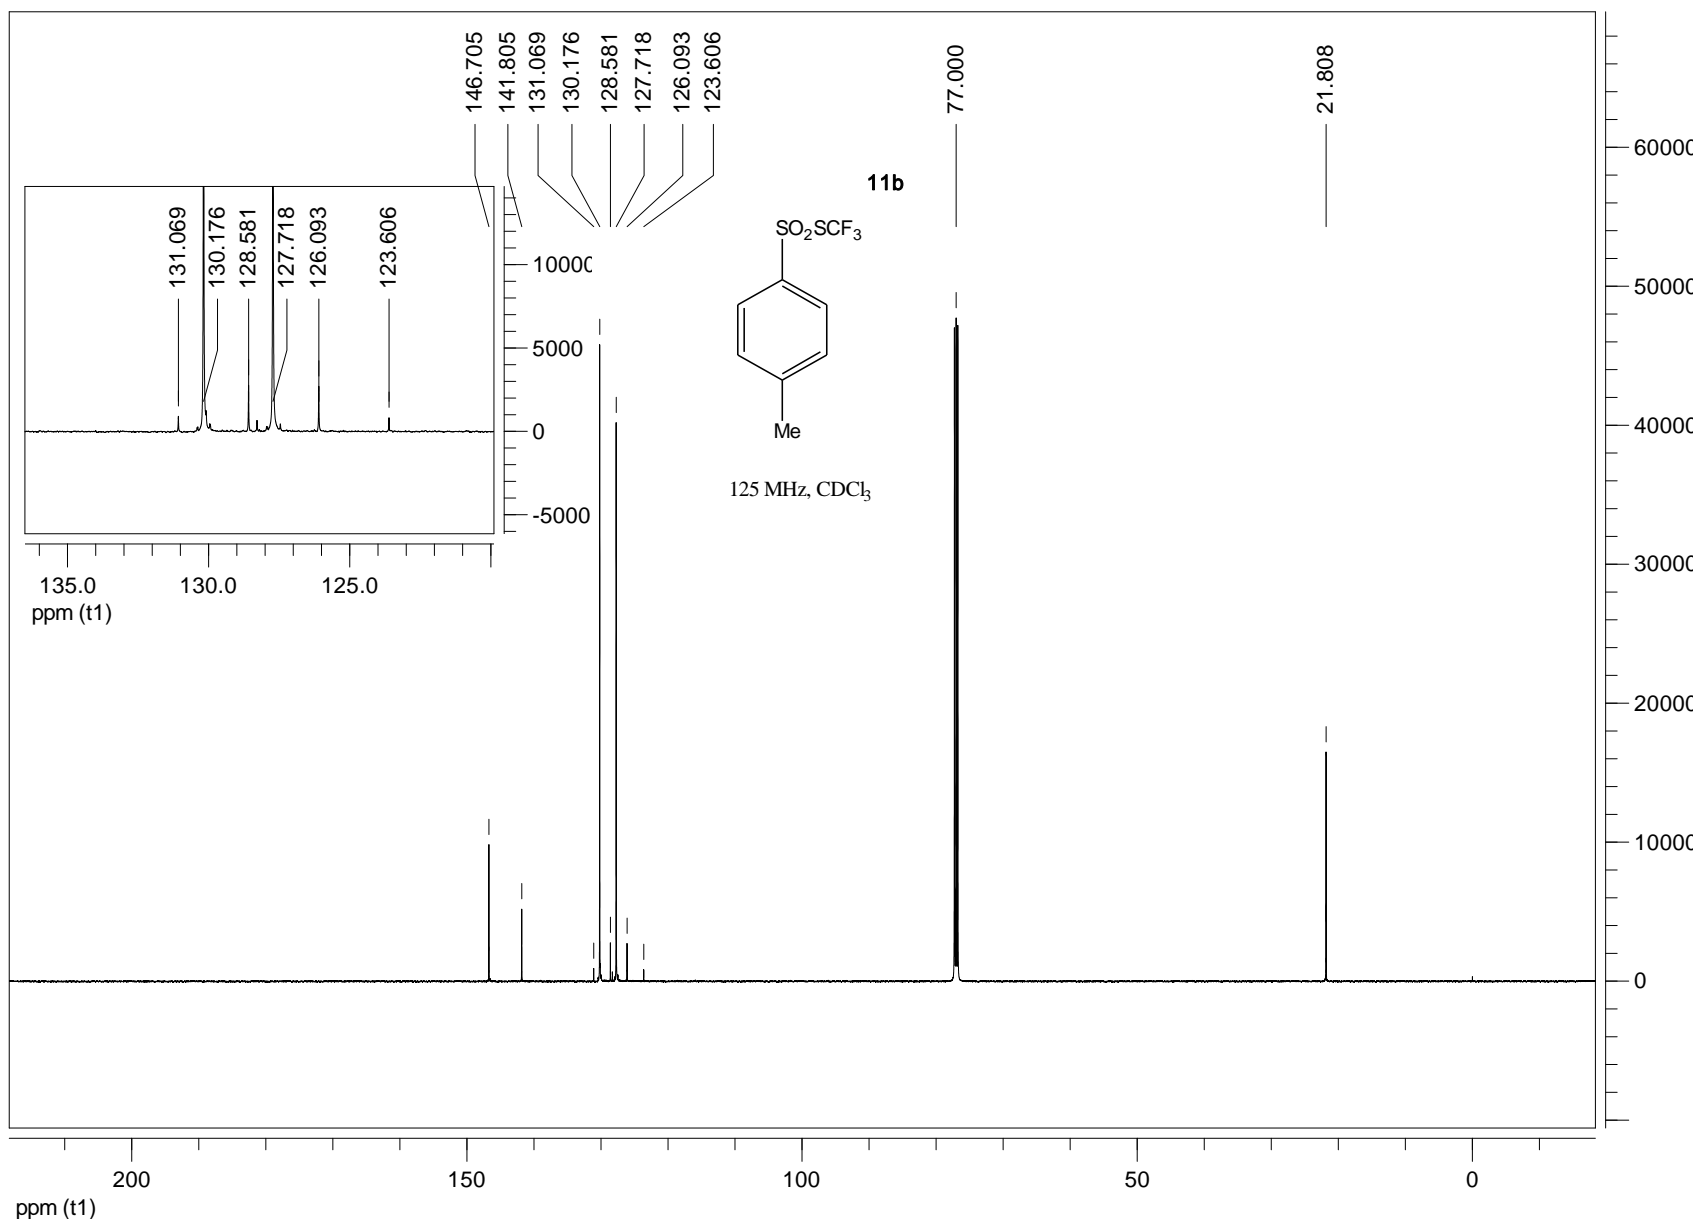

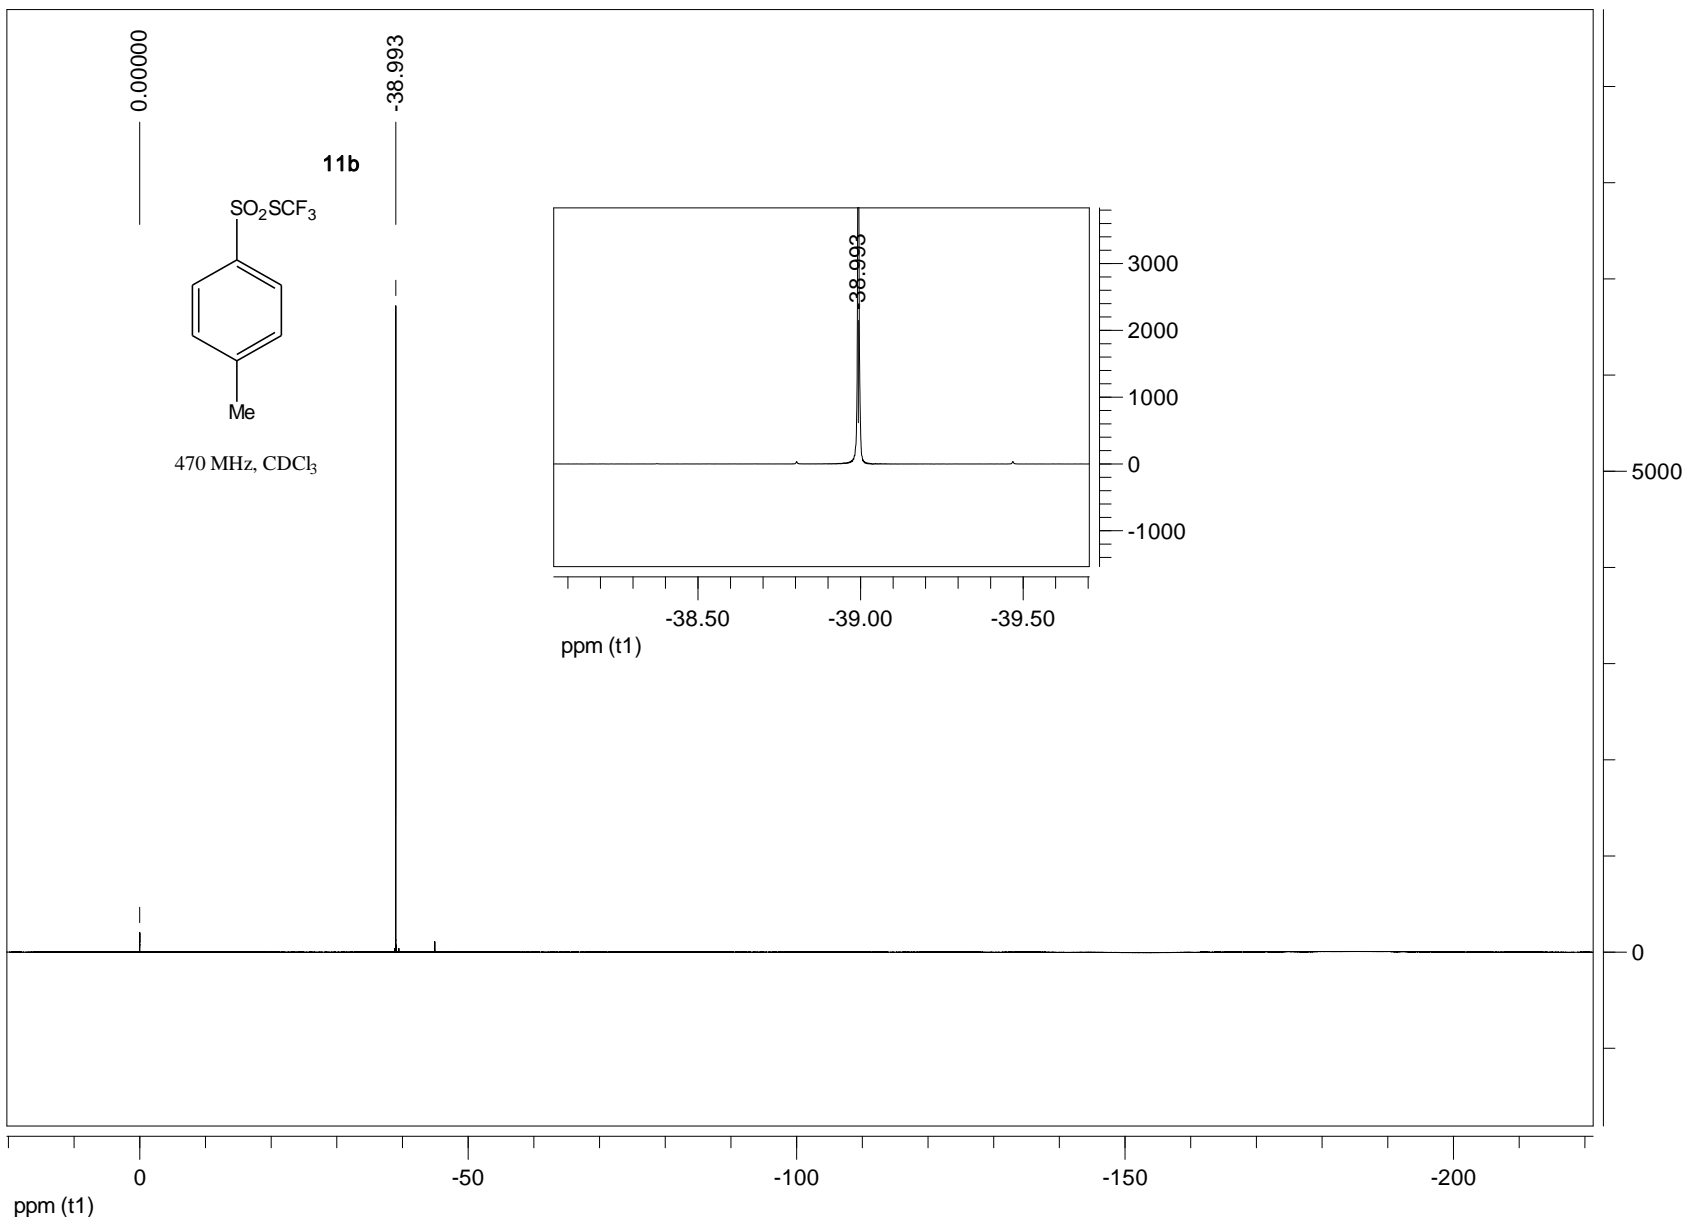

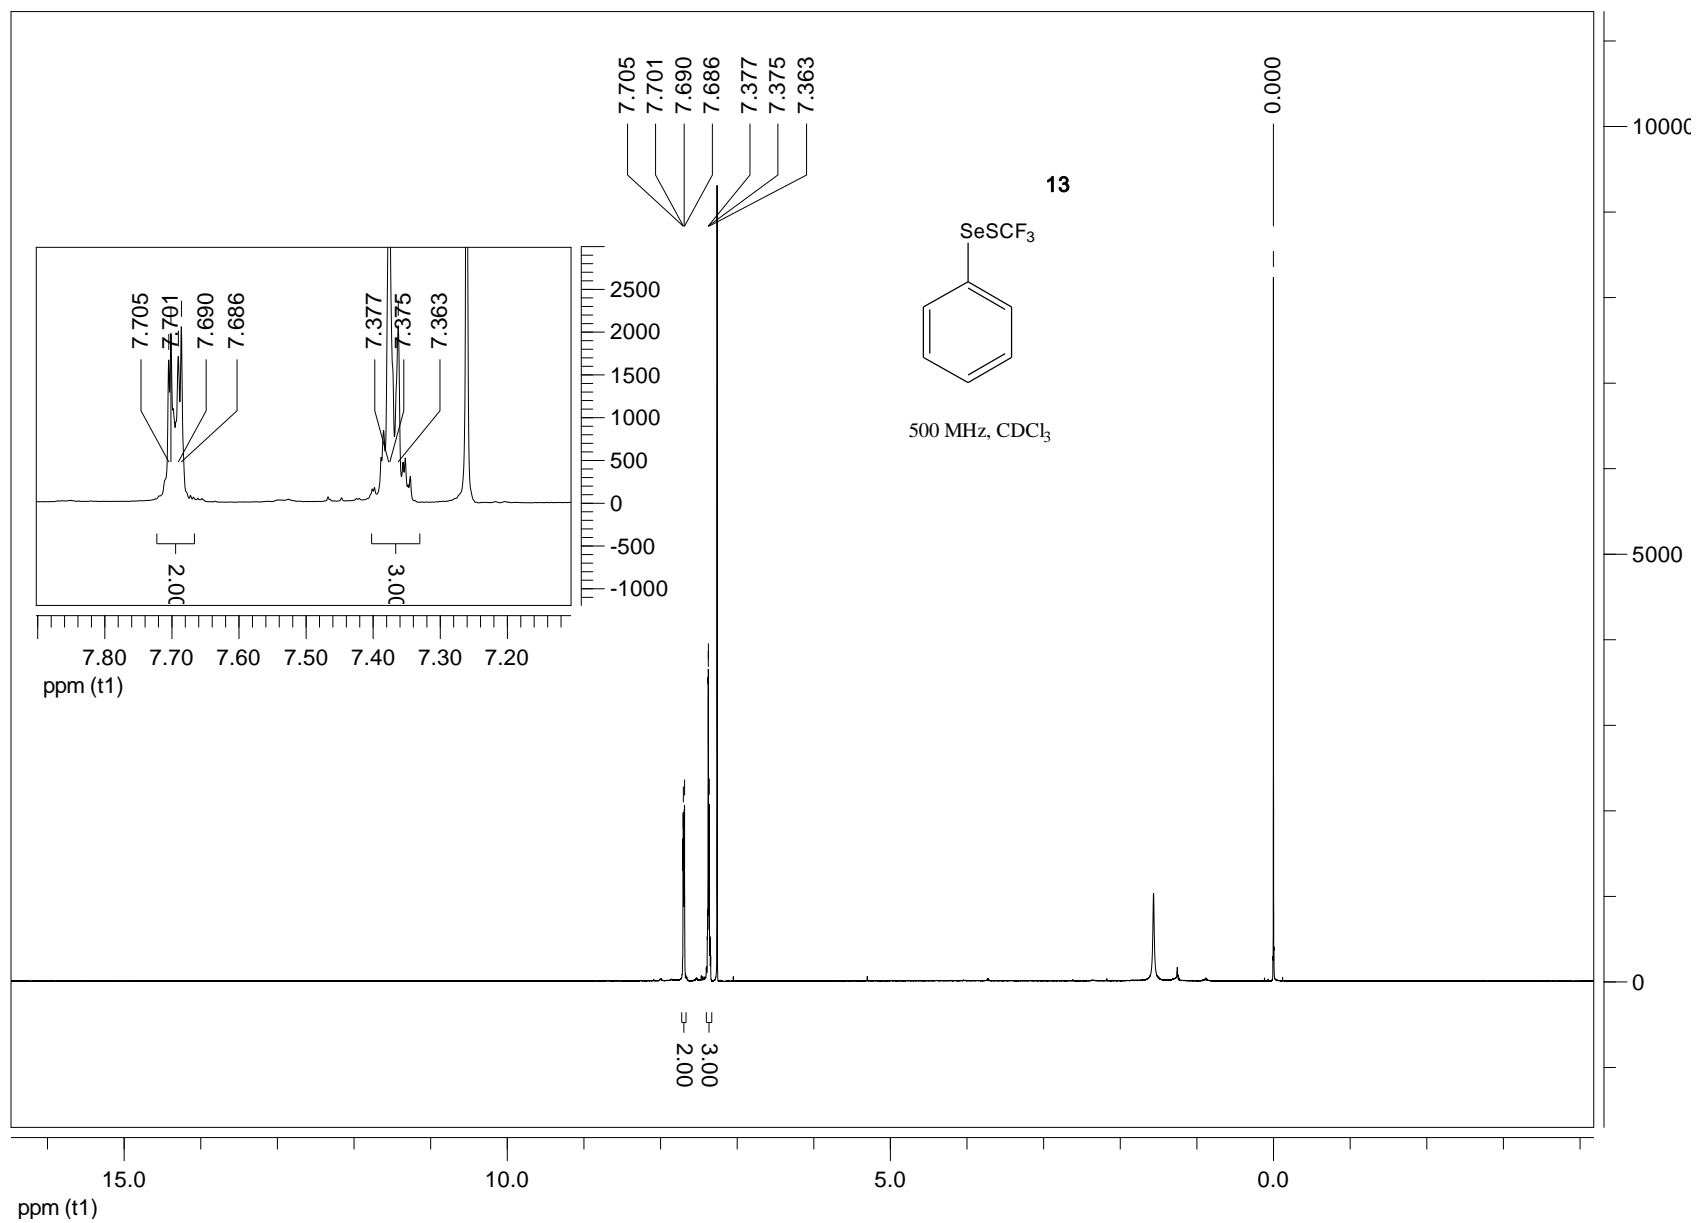

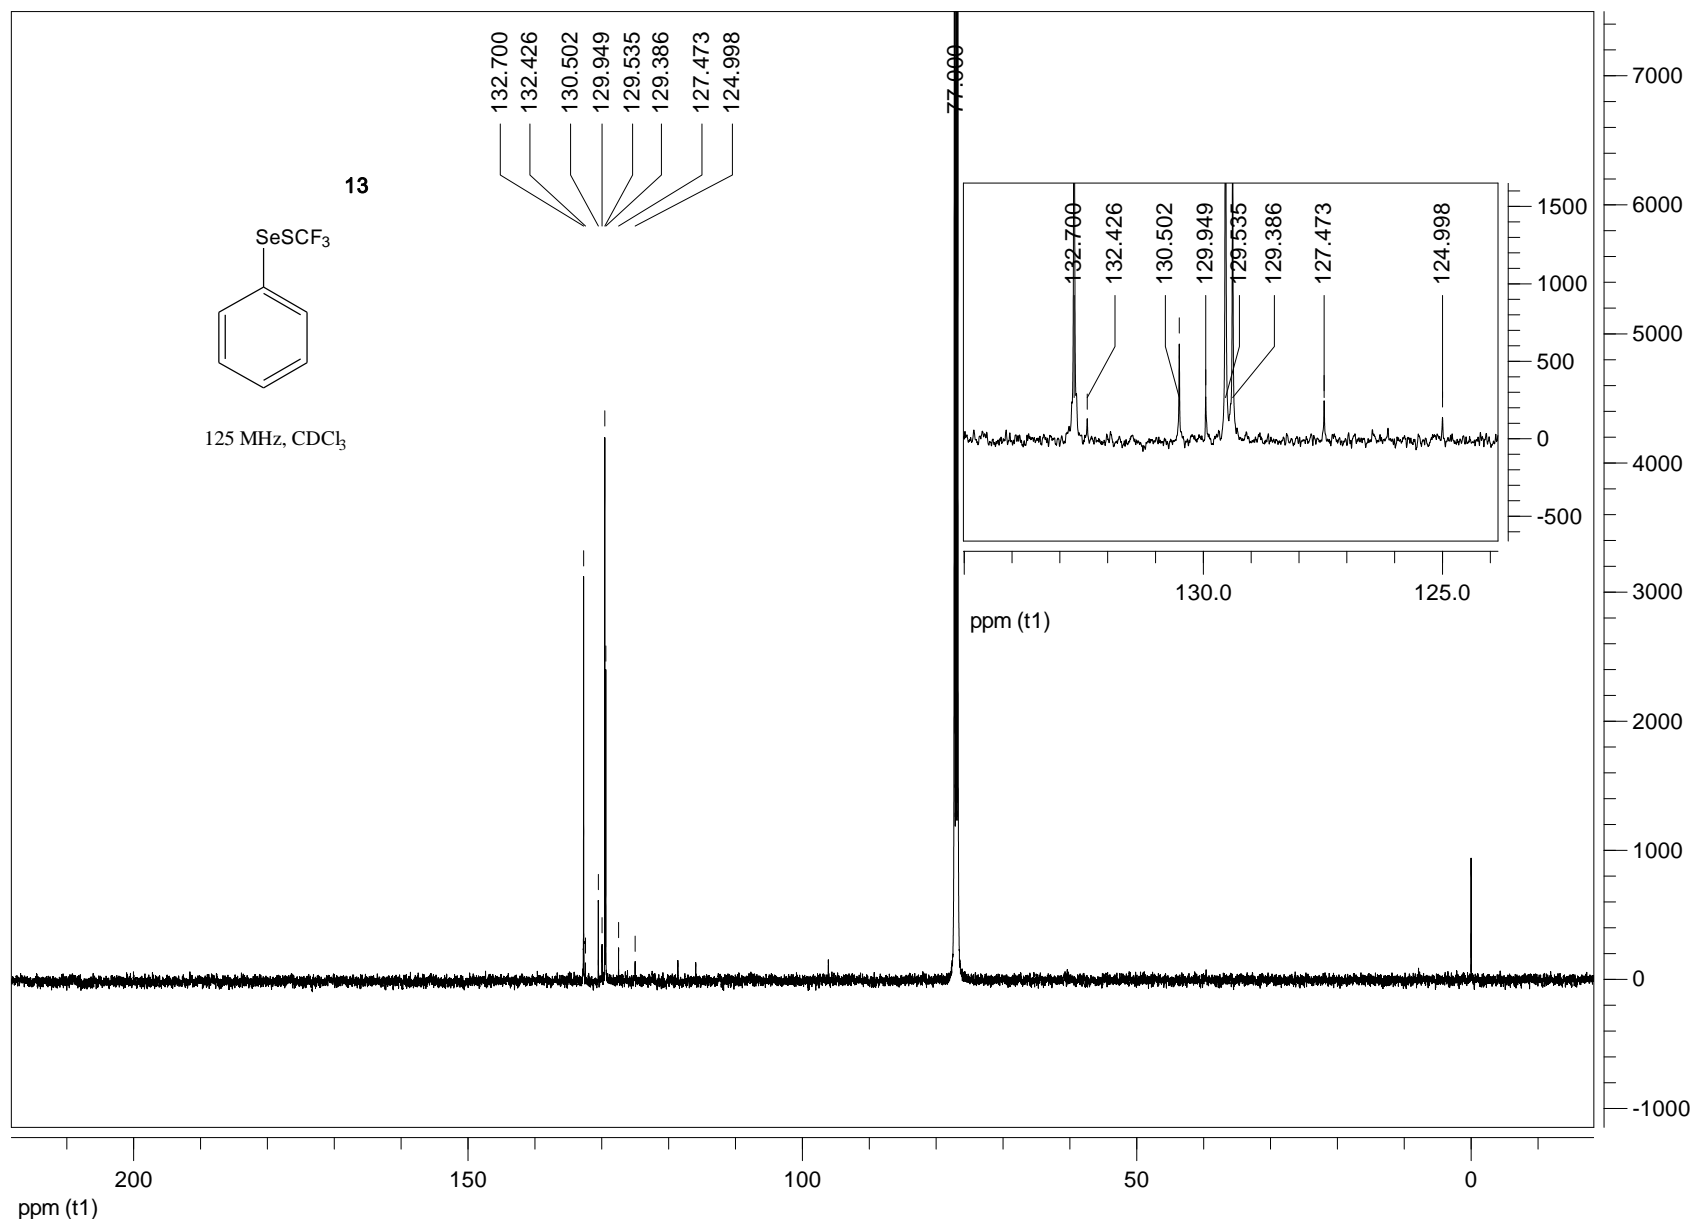

S139

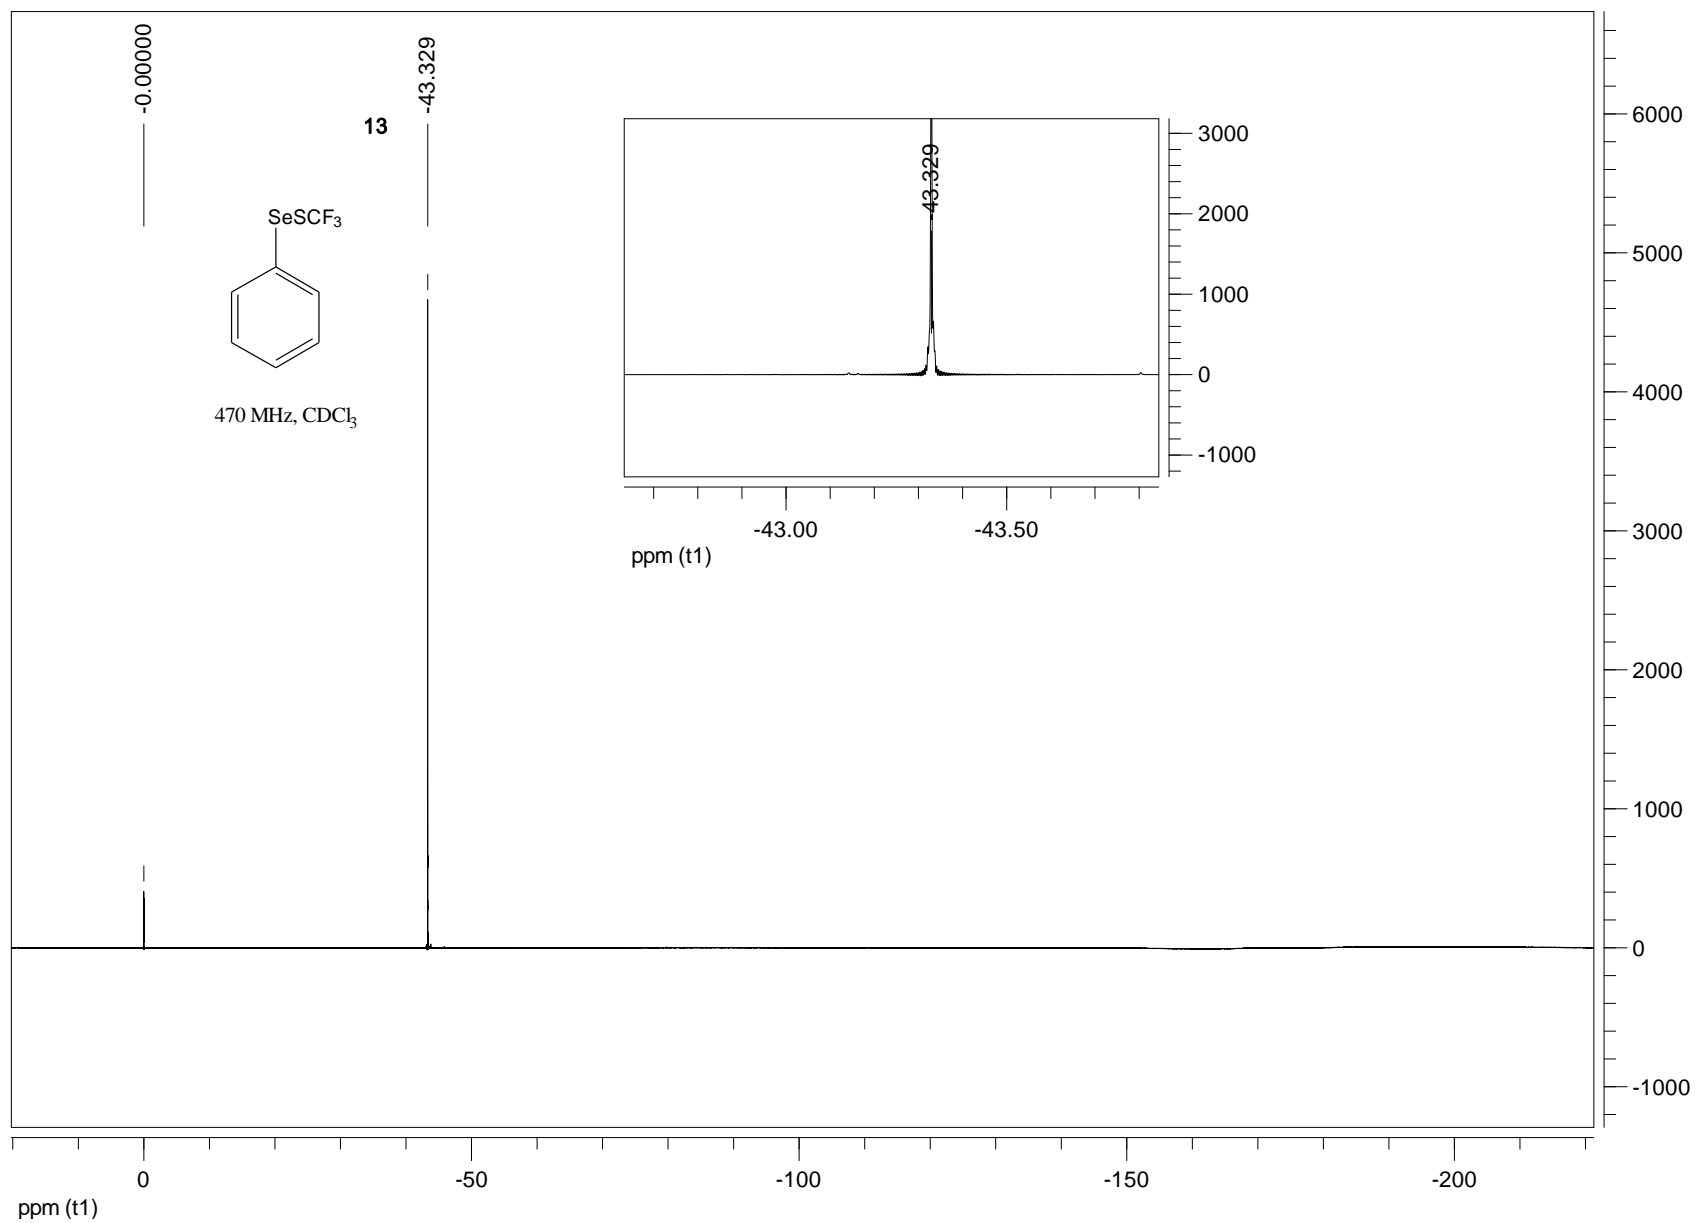

S140



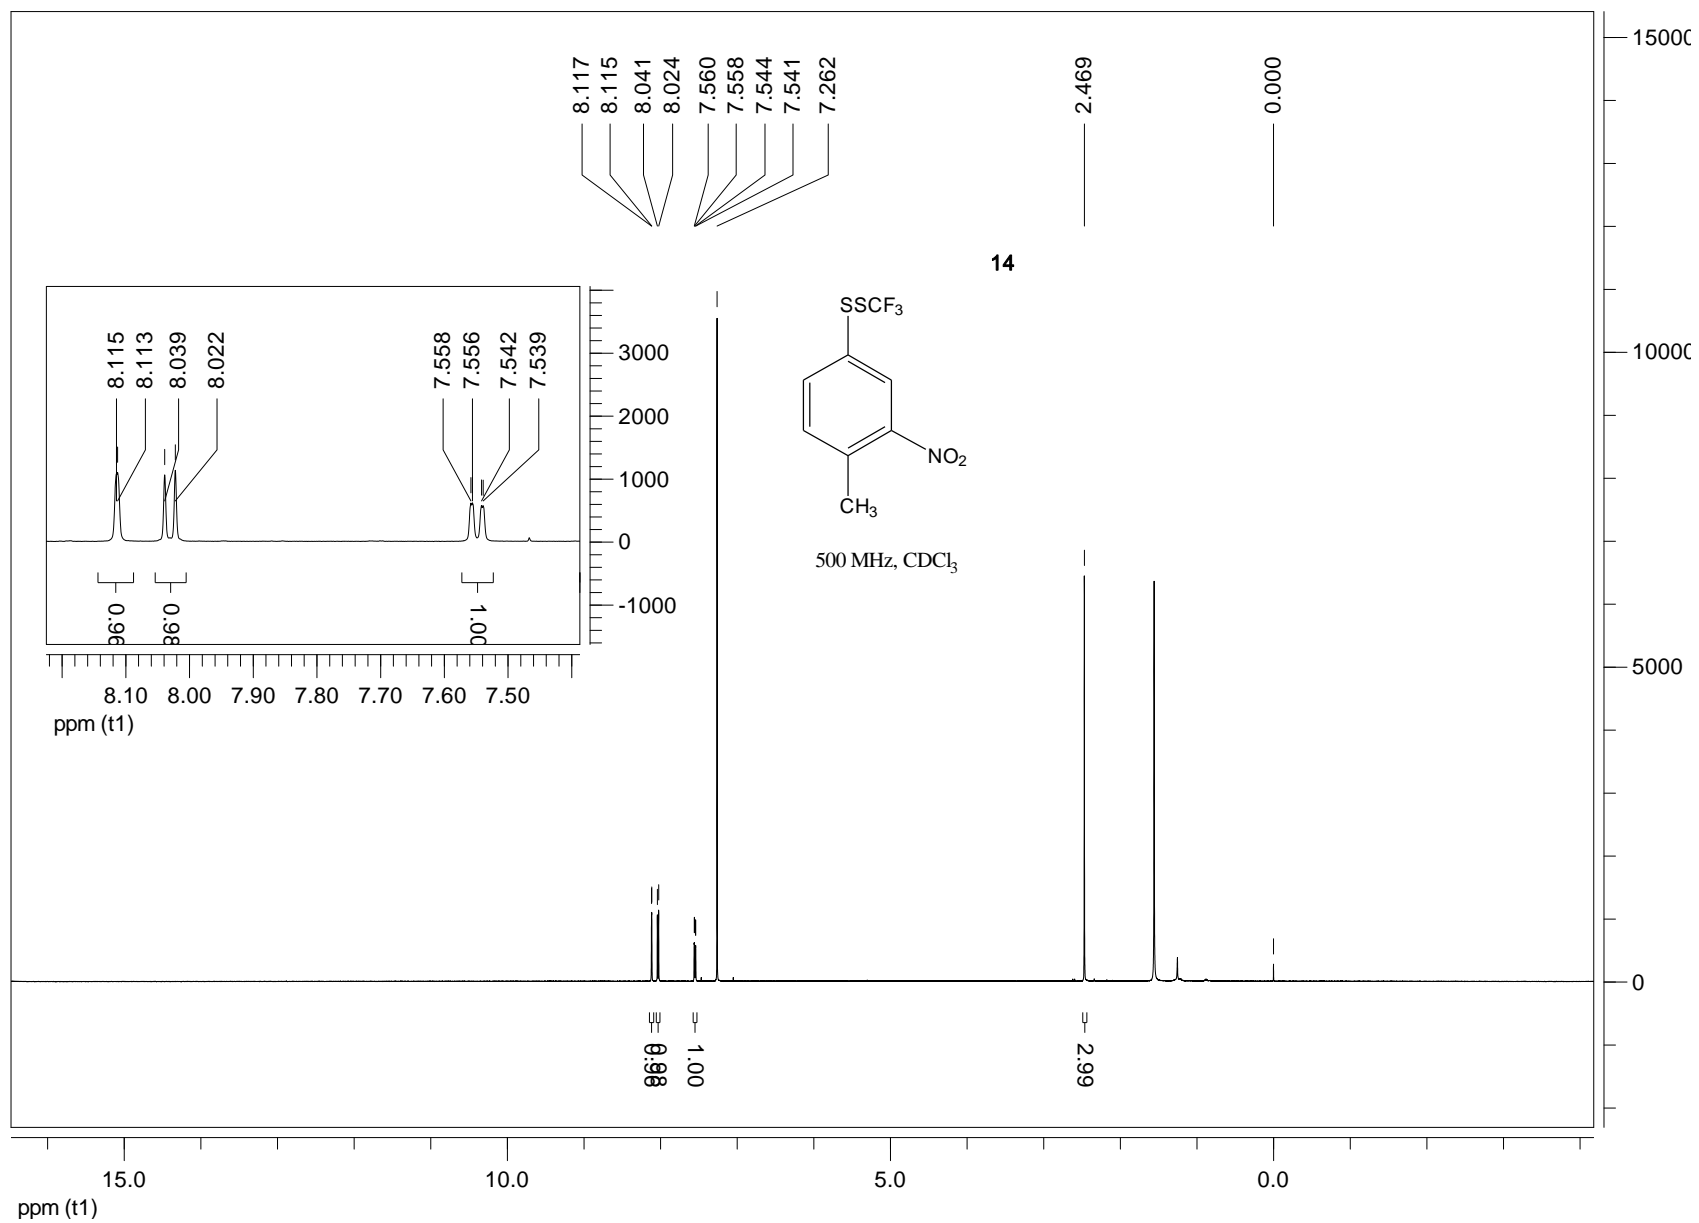

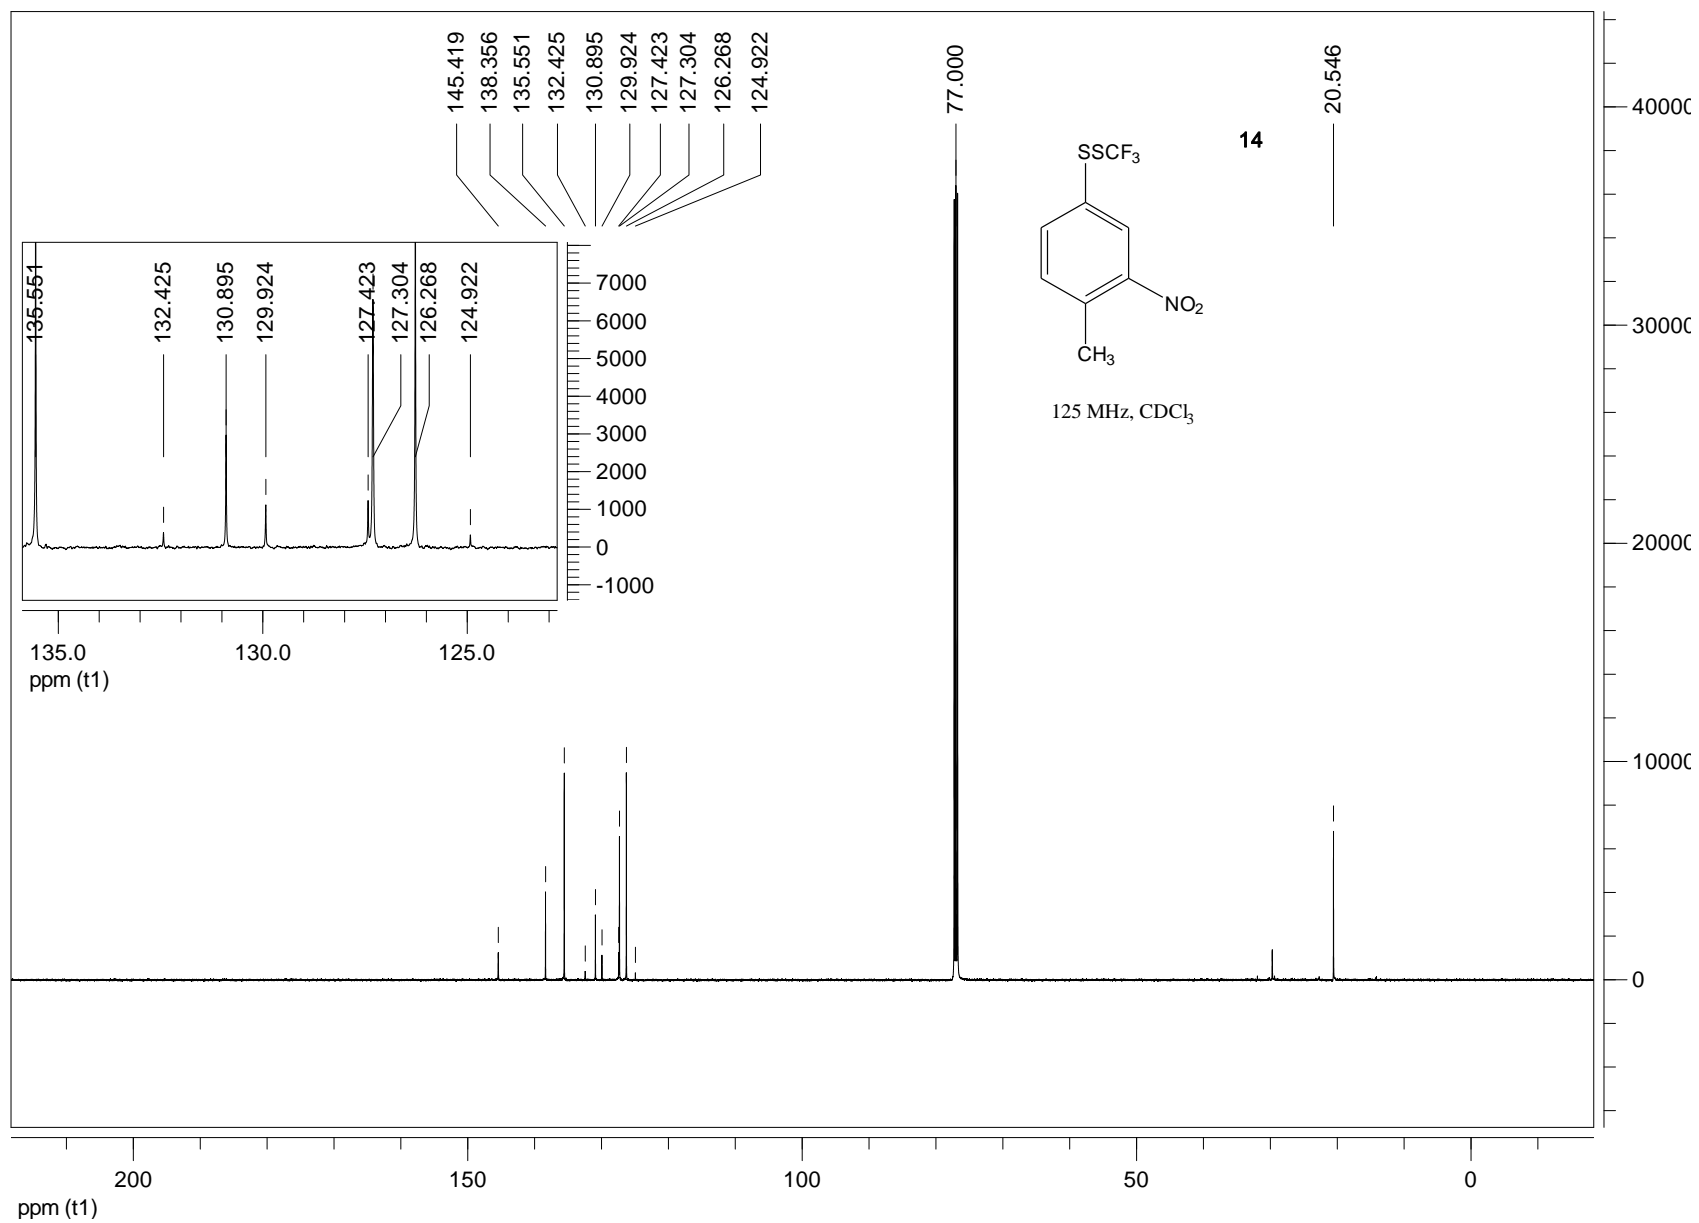

S142

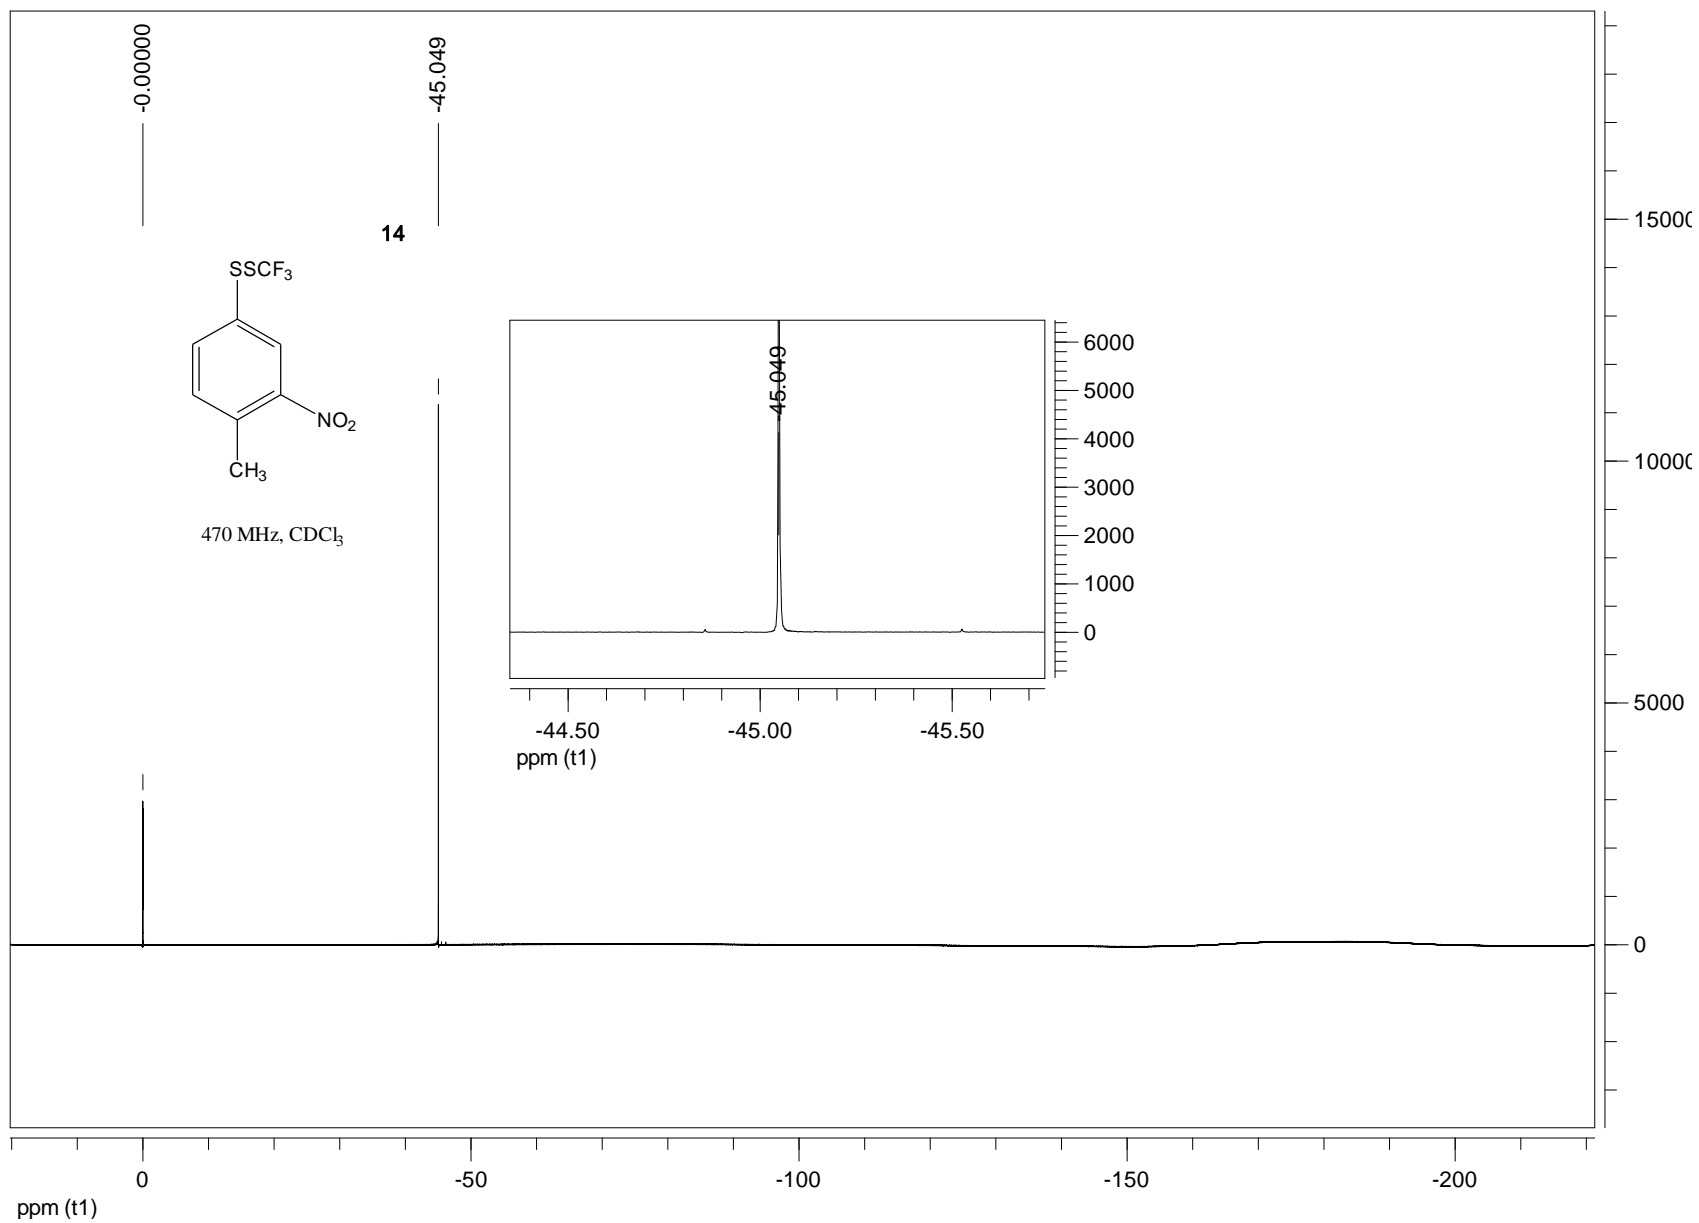

S143
